# Supplementary material for: Catalytic asymmetric C–C cross-couplings enabled by photoexcitation
Source: Springer Nature journal article supplement (doi:10.1038/s41557-021-00683-5), 2021-05-24
Supplement: 41557_2021_683_MOESM128_ESM.cif [file 41557_2021_683_MOESM128_ESM.cif]

 
data_af432_pl
 
_audit_creation_method            'SHELXL-2018/3'
_shelx_SHELXL_version_number      '2018/3'
_chemical_name_systematic         ?
_chemical_name_common             ?
_chemical_melting_point           ?
_chemical_formula_moiety          ?
_chemical_formula_sum
 'C22 H18 Cl N' 
_chemical_formula_weight          331.82

loop_
 _atom_type_symbol
 _atom_type_description
 _atom_type_scat_dispersion_real
 _atom_type_scat_dispersion_imag
 _atom_type_scat_source
 'C'  'C'   0.0033   0.0016
 'International Tables Vol C Tables 4.2.6.8 and 6.1.1.4'
 'H'  'H'   0.0000   0.0000
 'International Tables Vol C Tables 4.2.6.8 and 6.1.1.4'
 'Cl'  'Cl'   0.1484   0.1585
 'International Tables Vol C Tables 4.2.6.8 and 6.1.1.4'
 'N'  'N'   0.0061   0.0033
 'International Tables Vol C Tables 4.2.6.8 and 6.1.1.4'
 
_space_group_crystal_system       tetragonal
_space_group_IT_number            80
_space_group_name_H-M_alt         'I 41'
_space_group_name_Hall            'I 4bw'
 
_shelx_space_group_comment
;
The symmetry employed for this shelxl refinement is uniquely defined
by the following loop, which should always be used as a source of
symmetry information in preference to the above space-group names.
They are only intended as comments.
;
 
loop_
 _space_group_symop_operation_xyz
 'x, y, z'
 '-y, x+1/2, z+1/4'
 '-x+1/2, -y+1/2, z+1/2'
 'y+1/2, -x, z+3/4'
 'x+1/2, y+1/2, z+1/2'
 '-y+1/2, x+1, z+3/4'
 '-x+1, -y+1, z+1'
 'y+1, -x+1/2, z+5/4'
 
_cell_length_a                    18.4165(2)
_cell_length_b                    18.4165(2)
_cell_length_c                    10.6556(3)
_cell_angle_alpha                 90
_cell_angle_beta                  90
_cell_angle_gamma                 90
_cell_volume                      3614.03(13)
_cell_formula_units_Z             8
_cell_measurement_temperature     296(2)
_cell_measurement_reflns_used   21769
_cell_measurement_theta_min     2.4480
_cell_measurement_theta_max     24.1030
 
_exptl_crystal_description        'Block'
_exptl_crystal_colour             ?
_exptl_crystal_density_meas       ?
_exptl_crystal_density_method     ?
_exptl_crystal_density_diffrn     1.220          
_exptl_crystal_F_000              1392
_exptl_transmission_factor_min    ?
_exptl_transmission_factor_max    ?
_exptl_crystal_size_max           0.300
_exptl_crystal_size_mid           0.300
_exptl_crystal_size_min           0.150
_exptl_absorpt_coefficient_mu     0.213
_shelx_estimated_absorpt_T_min    0.939
_shelx_estimated_absorpt_T_max    0.969
_exptl_absorpt_correction_type    multi-scan
_exptl_absorpt_correction_T_min                   0.63207
_exptl_absorpt_correction_T_max                   1.00000
_exptl_absorpt_process_details   
;
 CrysAlisPro 1.171.40.35a (Rigaku Oxford Diffraction, 2018)
 Empirical absorption correction using spherical harmonics,
 implemented in SCALE3 ABSPACK scaling algorithm.
;

_exptl_absorpt_special_details    ?
_diffrn_ambient_temperature       296(2)
_diffrn_radiation_wavelength      0.71075
_diffrn_radiation_type            MoK\a
_diffrn_source                    'Microfocus rotating anode X-ray tube' 
_diffrn_source_type               'Rigaku MicroMax-007HF'
_diffrn_source_power              50
_diffrn_source_current            24
_diffrn_source_size               '0.2 mm x 0.2 mm fine focus'
_diffrn_radiation_monochromator   'Confocal Max Flux optic'
_diffrn_detector_type             'PILATUS 200K'
_diffrn_measurement_device_type   '1/4chi goniometer' 
_diffrn_measurement_method
;
 Fullsphere data collection, phi and omega scans
;
_diffrn_detector_area_resol_mean  5.8140 
_diffrn_reflns_number             58409
_diffrn_reflns_av_unetI/netI      0.0259
_diffrn_reflns_av_R_equivalents   0.0308
_diffrn_reflns_limit_h_min        -26
_diffrn_reflns_limit_h_max        27
_diffrn_reflns_limit_k_min        -27
_diffrn_reflns_limit_k_max        27
_diffrn_reflns_limit_l_min        -15
_diffrn_reflns_limit_l_max        15
_diffrn_reflns_theta_min          3.126
_diffrn_reflns_theta_max          32.069
_diffrn_reflns_theta_full         25.242
_diffrn_measured_fraction_theta_max   0.982
_diffrn_measured_fraction_theta_full  0.998
_diffrn_reflns_Laue_measured_fraction_max    0.982
_diffrn_reflns_Laue_measured_fraction_full   0.998
_diffrn_reflns_point_group_measured_fraction_max   0.971
_diffrn_reflns_point_group_measured_fraction_full  0.999
_reflns_number_total              6115
_reflns_number_gt                 3275
_reflns_threshold_expression      'I > 2\s(I)'
_reflns_Friedel_coverage          0.888
_reflns_Friedel_fraction_max      0.959
_reflns_Friedel_fraction_full     0.999
 
_reflns_special_details
;
 Reflections were merged by SHELXL according to the crystal
 class for the calculation of statistics and refinement.
 
 _reflns_Friedel_fraction is defined as the number of unique
 Friedel pairs measured divided by the number that would be
 possible theoretically, ignoring centric projections and
 systematic absences.
;
 
_computing_data_collection     'CrysAlisPro 1.171.40.53 64bit (Rigaku OD, 2019)' 
_computing_cell_refinement     'CrysAlisPro 1.171.40.53 64bit (Rigaku OD, 2019)' 
_computing_data_reduction      'CrysAlisPro 1.171.40.53 64bit (Rigaku OD, 2019)' 
_computing_structure_solution   'Sir2019'
_computing_structure_refinement 'SHELXL-2018/3 (Sheldrick, 2018)'
_computing_molecular_graphics   'shelXle (H�bschle, Sheldrick and Dittirch, 2011)' 
_computing_publication_material 'SHELXL-2018/3 (Sheldrick, 2018)' 
_refine_special_details           ?
_refine_ls_structure_factor_coef  Fsqd
_refine_ls_matrix_type            full
_refine_ls_weighting_scheme       calc
_refine_ls_weighting_details
'w=1/[\s^2^(Fo^2^)+(0.0911P)^2^+0.2170P] where P=(Fo^2^+2Fc^2^)/3'
_atom_sites_solution_primary      ?
_atom_sites_solution_secondary    ?
_atom_sites_solution_hydrogens    geom
_refine_ls_hydrogen_treatment     constr
_refine_ls_extinction_method      none
_refine_ls_extinction_coef        .
_refine_ls_abs_structure_details
;
 Flack x determined using 1231 quotients [(I+)-(I-)]/[(I+)+(I-)]
 (Parsons, Flack and Wagner, Acta Cryst. B69 (2013) 249-259).
;
_refine_ls_abs_structure_Flack    0.03(2)
_chemical_absolute_configuration  ad
_refine_ls_number_reflns          6115
_refine_ls_number_parameters      217
_refine_ls_number_restraints      1
_refine_ls_R_factor_all           0.0888
_refine_ls_R_factor_gt            0.0501
_refine_ls_wR_factor_ref          0.1805
_refine_ls_wR_factor_gt           0.1520
_refine_ls_goodness_of_fit_ref    0.998
_refine_ls_restrained_S_all       0.998
_refine_ls_shift/su_max           0.000
_refine_ls_shift/su_mean          0.000
 
loop_
 _atom_site_label
 _atom_site_type_symbol
 _atom_site_fract_x
 _atom_site_fract_y
 _atom_site_fract_z
 _atom_site_U_iso_or_equiv
 _atom_site_adp_type
 _atom_site_occupancy
 _atom_site_site_symmetry_order  
 _atom_site_calc_flag
 _atom_site_refinement_flags_posn
 _atom_site_refinement_flags_adp
 _atom_site_refinement_flags_occupancy
 _atom_site_disorder_assembly
 _atom_site_disorder_group
Cl1A Cl -0.41418(7) -1.08079(9) 0.64678(17) 0.1650(6) Uani 1 1 d . . . . .
N1A N -0.10309(12) -0.98277(11) 0.3752(3) 0.0948(7) Uani 1 1 d . . . . .
C1A C -0.11909(13) -0.94579(15) 0.4849(4) 0.0972(9) Uani 1 1 d . . . . .
C2A C -0.12586(18) -0.9717(2) 0.6077(4) 0.1147(11) Uani 1 1 d . . . . .
H2A H -0.119371 -1.020612 0.626220 0.138 Uiso 1 1 calc R U . . .
C3A C -0.1425(2) -0.9222(3) 0.7000(5) 0.1404(16) Uani 1 1 d . . . . .
H3A H -0.147447 -0.937886 0.782534 0.168 Uiso 1 1 calc R U . . .
C4A C -0.1518(3) -0.8501(4) 0.6723(9) 0.164(2) Uani 1 1 d . . . . .
H4A H -0.163696 -0.818289 0.736959 0.197 Uiso 1 1 calc R U . . .
C5A C -0.1445(2) -0.8231(2) 0.5547(9) 0.156(2) Uani 1 1 d . . . . .
H5A H -0.149991 -0.773825 0.538511 0.187 Uiso 1 1 calc R U . . .
C6A C -0.12835(16) -0.87232(17) 0.4583(5) 0.1169(14) Uani 1 1 d . . . . .
C7A C -0.11818(16) -0.86418(18) 0.3250(6) 0.1299(17) Uani 1 1 d . . . . .
C8A C -0.1191(3) -0.8068(3) 0.2402(11) 0.185(3) Uani 1 1 d . . . . .
H8A H -0.128549 -0.759874 0.268137 0.222 Uiso 1 1 calc R U . . .
C9A C -0.1058(4) -0.8194(5) 0.1142(11) 0.209(5) Uani 1 1 d . . . . .
H9A H -0.107154 -0.780663 0.058301 0.250 Uiso 1 1 calc R U . . .
C10A C -0.0906(3) -0.8887(5) 0.0691(7) 0.175(3) Uani 1 1 d . . . . .
H10A H -0.081280 -0.895388 -0.015930 0.210 Uiso 1 1 calc R U . . .
C11A C -0.0891(2) -0.9475(3) 0.1490(5) 0.1315(15) Uani 1 1 d . . . . .
H11A H -0.079334 -0.994123 0.119858 0.158 Uiso 1 1 calc R U . . .
C12A C -0.10302(15) -0.93403(17) 0.2758(4) 0.1050(11) Uani 1 1 d . . . . .
C13A C -0.08896(13) -1.05981(15) 0.3619(4) 0.0956(8) Uani 1 1 d . . . . .
H13A H -0.076913 -1.079925 0.443443 0.115 Uiso 1 1 calc R U . . .
H13B H -0.047345 -1.066629 0.307380 0.115 Uiso 1 1 calc R U . . .
C14A C -0.15454(14) -1.10140(15) 0.3072(3) 0.0954(8) Uani 1 1 d . . . . .
H14A H -0.167808 -1.077433 0.228370 0.114 Uiso 1 1 calc R U . . .
C15A C -0.21928(12) -1.09601(11) 0.3934(3) 0.0849(7) Uani 1 1 d . . . . .
C16A C -0.27333(15) -1.04596(13) 0.3694(4) 0.0961(8) Uani 1 1 d . . . . .
H16A H -0.269821 -1.015845 0.299601 0.115 Uiso 1 1 calc R U . . .
C17A C -0.33306(16) -1.04023(16) 0.4489(4) 0.1109(11) Uani 1 1 d . . . . .
H17A H -0.369197 -1.006137 0.433254 0.133 Uiso 1 1 calc R U . . .
C18A C -0.33780(17) -1.08560(19) 0.5506(4) 0.1067(10) Uani 1 1 d . . . . .
C19A C -0.28440(18) -1.13481(19) 0.5770(4) 0.1094(10) Uani 1 1 d . . . . .
H19A H -0.287619 -1.164562 0.647258 0.131 Uiso 1 1 calc R U . . .
C20A C -0.22585(14) -1.13945(16) 0.4974(4) 0.1042(9) Uani 1 1 d . . . . .
H20A H -0.189522 -1.173088 0.514676 0.125 Uiso 1 1 calc R U . . .
C21A C -0.1343(2) -1.1784(2) 0.2757(5) 0.1313(15) Uani 1 1 d . . . . .
H21A H -0.171454 -1.210994 0.293866 0.158 Uiso 1 1 calc R U . . .
C22A C -0.0845(4) -1.2065(3) 0.2350(10) 0.202(4) Uani 1 1 d . . . . .
H22A H -0.043851 -1.179380 0.213209 0.243 Uiso 1 1 calc R U . . .
H22B H -0.084531 -1.256575 0.223615 0.243 Uiso 1 1 calc R U . . .
 
loop_
 _atom_site_aniso_label
 _atom_site_aniso_U_11
 _atom_site_aniso_U_22
 _atom_site_aniso_U_33
 _atom_site_aniso_U_23
 _atom_site_aniso_U_13
 _atom_site_aniso_U_12
Cl1A 0.1093(7) 0.1836(12) 0.2022(12) -0.0494(10) 0.0403(8) 0.0058(7)
N1A 0.0731(12) 0.0670(11) 0.1443(19) 0.0134(13) -0.0052(12) -0.0134(8)
C1A 0.0581(11) 0.0709(13) 0.163(3) 0.0022(17) -0.0069(15) -0.0140(10)
C2A 0.0824(17) 0.0952(19) 0.167(3) 0.001(2) 0.0038(19) -0.0140(14)
C3A 0.093(2) 0.149(4) 0.179(4) -0.040(3) 0.011(2) -0.018(2)
C4A 0.104(3) 0.122(4) 0.266(8) -0.064(5) 0.005(4) -0.008(3)
C5A 0.079(2) 0.082(2) 0.307(8) -0.029(4) -0.026(3) -0.0065(15)
C6A 0.0669(14) 0.0705(15) 0.213(5) -0.003(2) -0.024(2) -0.0152(11)
C7A 0.0682(15) 0.0803(18) 0.241(5) 0.040(2) -0.033(2) -0.0216(12)
C8A 0.115(3) 0.108(3) 0.331(9) 0.093(5) -0.065(5) -0.033(2)
C9A 0.135(4) 0.184(7) 0.307(11) 0.149(8) -0.063(6) -0.048(4)
C10A 0.117(3) 0.200(6) 0.207(5) 0.095(5) -0.034(3) -0.041(4)
C11A 0.087(2) 0.150(3) 0.158(4) 0.049(3) -0.021(2) -0.030(2)
C12A 0.0641(13) 0.0912(19) 0.160(3) 0.0339(18) -0.0167(16) -0.0214(11)
C13A 0.0624(12) 0.0755(14) 0.149(3) 0.0102(15) -0.0001(14) -0.0062(9)
C14A 0.0713(13) 0.0730(13) 0.142(2) 0.0007(15) -0.0026(14) -0.0083(10)
C15A 0.0633(11) 0.0557(10) 0.136(2) -0.0037(12) -0.0067(12) -0.0083(8)
C16A 0.0820(15) 0.0600(11) 0.146(2) 0.0046(14) -0.0153(16) 0.0005(10)
C17A 0.0778(16) 0.0713(14) 0.184(3) -0.0209(18) -0.0111(19) 0.0105(11)
C18A 0.0797(16) 0.0904(18) 0.150(3) -0.024(2) 0.0075(17) -0.0054(13)
C19A 0.0852(18) 0.0955(19) 0.148(3) 0.0126(19) 0.0015(17) -0.0082(13)
C20A 0.0666(13) 0.0780(14) 0.168(3) 0.0194(17) -0.0049(16) 0.0034(11)
C21A 0.102(2) 0.0834(18) 0.208(4) -0.021(2) 0.034(3) -0.0067(15)
C22A 0.174(5) 0.100(3) 0.333(10) -0.017(4) 0.111(6) -0.003(3)
 
_geom_special_details
;
 All esds (except the esd in the dihedral angle between two l.s. planes)
 are estimated using the full covariance matrix.  The cell esds are taken
 into account individually in the estimation of esds in distances, angles
 and torsion angles; correlations between esds in cell parameters are only
 used when they are defined by crystal symmetry.  An approximate (isotropic)
 treatment of cell esds is used for estimating esds involving l.s. planes.
;
 
loop_
 _geom_bond_atom_site_label_1
 _geom_bond_atom_site_label_2
 _geom_bond_distance
 _geom_bond_site_symmetry_2
 _geom_bond_publ_flag
Cl1A C18A 1.742(4) . ?
N1A C1A 1.384(5) . ?
N1A C12A 1.389(4) . ?
N1A C13A 1.449(4) . ?
C1A C6A 1.393(4) . ?
C1A C2A 1.398(6) . ?
C2A C3A 1.376(6) . ?
C2A H2A 0.9300 . ?
C3A C4A 1.372(9) . ?
C3A H3A 0.9300 . ?
C4A C5A 1.354(10) . ?
C4A H4A 0.9300 . ?
C5A C6A 1.402(8) . ?
C5A H5A 0.9300 . ?
C6A C7A 1.440(7) . ?
C7A C8A 1.391(8) . ?
C7A C12A 1.417(6) . ?
C8A C9A 1.384(14) . ?
C8A H8A 0.9300 . ?
C9A C10A 1.393(13) . ?
C9A H9A 0.9300 . ?
C10A C11A 1.378(8) . ?
C10A H10A 0.9300 . ?
C11A C12A 1.398(7) . ?
C11A H11A 0.9300 . ?
C13A C14A 1.545(4) . ?
C13A H13A 0.9700 . ?
C13A H13B 0.9700 . ?
C14A C21A 1.505(5) . ?
C14A C15A 1.508(4) . ?
C14A H14A 0.9800 . ?
C15A C20A 1.373(5) . ?
C15A C16A 1.381(4) . ?
C16A C17A 1.392(5) . ?
C16A H16A 0.9300 . ?
C17A C18A 1.371(6) . ?
C17A H17A 0.9300 . ?
C18A C19A 1.366(5) . ?
C19A C20A 1.374(5) . ?
C19A H19A 0.9300 . ?
C20A H20A 0.9300 . ?
C21A C22A 1.138(7) . ?
C21A H21A 0.9300 . ?
C22A H22A 0.9300 . ?
C22A H22B 0.9300 . ?
 
loop_
 _geom_angle_atom_site_label_1
 _geom_angle_atom_site_label_2
 _geom_angle_atom_site_label_3
 _geom_angle
 _geom_angle_site_symmetry_1
 _geom_angle_site_symmetry_3
 _geom_angle_publ_flag
C1A N1A C12A 109.0(3) . . ?
C1A N1A C13A 127.0(3) . . ?
C12A N1A C13A 123.9(3) . . ?
N1A C1A C6A 109.4(3) . . ?
N1A C1A C2A 129.9(3) . . ?
C6A C1A C2A 120.8(4) . . ?
C3A C2A C1A 117.6(4) . . ?
C3A C2A H2A 121.2 . . ?
C1A C2A H2A 121.2 . . ?
C4A C3A C2A 121.0(6) . . ?
C4A C3A H3A 119.5 . . ?
C2A C3A H3A 119.5 . . ?
C5A C4A C3A 122.8(6) . . ?
C5A C4A H4A 118.6 . . ?
C3A C4A H4A 118.6 . . ?
C4A C5A C6A 117.6(4) . . ?
C4A C5A H5A 121.2 . . ?
C6A C5A H5A 121.2 . . ?
C1A C6A C5A 120.3(5) . . ?
C1A C6A C7A 106.6(4) . . ?
C5A C6A C7A 133.1(4) . . ?
C8A C7A C12A 116.9(7) . . ?
C8A C7A C6A 135.9(6) . . ?
C12A C7A C6A 107.2(3) . . ?
C9A C8A C7A 120.0(8) . . ?
C9A C8A H8A 120.0 . . ?
C7A C8A H8A 120.0 . . ?
C8A C9A C10A 121.7(6) . . ?
C8A C9A H9A 119.2 . . ?
C10A C9A H9A 119.2 . . ?
C11A C10A C9A 120.7(8) . . ?
C11A C10A H10A 119.6 . . ?
C9A C10A H10A 119.6 . . ?
C10A C11A C12A 117.0(6) . . ?
C10A C11A H11A 121.5 . . ?
C12A C11A H11A 121.5 . . ?
N1A C12A C11A 128.5(4) . . ?
N1A C12A C7A 107.7(4) . . ?
C11A C12A C7A 123.7(4) . . ?
N1A C13A C14A 112.5(2) . . ?
N1A C13A H13A 109.1 . . ?
C14A C13A H13A 109.1 . . ?
N1A C13A H13B 109.1 . . ?
C14A C13A H13B 109.1 . . ?
H13A C13A H13B 107.8 . . ?
C21A C14A C15A 113.2(2) . . ?
C21A C14A C13A 111.0(3) . . ?
C15A C14A C13A 110.8(3) . . ?
C21A C14A H14A 107.2 . . ?
C15A C14A H14A 107.2 . . ?
C13A C14A H14A 107.2 . . ?
C20A C15A C16A 118.4(3) . . ?
C20A C15A C14A 121.5(2) . . ?
C16A C15A C14A 120.1(3) . . ?
C15A C16A C17A 120.5(3) . . ?
C15A C16A H16A 119.7 . . ?
C17A C16A H16A 119.7 . . ?
C18A C17A C16A 119.0(3) . . ?
C18A C17A H17A 120.5 . . ?
C16A C17A H17A 120.5 . . ?
C19A C18A C17A 121.4(3) . . ?
C19A C18A Cl1A 119.6(3) . . ?
C17A C18A Cl1A 119.0(3) . . ?
C18A C19A C20A 118.7(4) . . ?
C18A C19A H19A 120.7 . . ?
C20A C19A H19A 120.7 . . ?
C15A C20A C19A 122.1(3) . . ?
C15A C20A H20A 119.0 . . ?
C19A C20A H20A 119.0 . . ?
C22A C21A C14A 135.4(4) . . ?
C22A C21A H21A 112.3 . . ?
C14A C21A H21A 112.3 . . ?
C21A C22A H22A 120.0 . . ?
C21A C22A H22B 120.0 . . ?
H22A C22A H22B 120.0 . . ?
 
loop_
 _geom_torsion_atom_site_label_1
 _geom_torsion_atom_site_label_2
 _geom_torsion_atom_site_label_3
 _geom_torsion_atom_site_label_4
 _geom_torsion
 _geom_torsion_site_symmetry_1
 _geom_torsion_site_symmetry_2
 _geom_torsion_site_symmetry_3
 _geom_torsion_site_symmetry_4
 _geom_torsion_publ_flag
C12A N1A C1A C6A -1.0(3) . . . . ?
C13A N1A C1A C6A 179.5(2) . . . . ?
C12A N1A C1A C2A 179.4(3) . . . . ?
C13A N1A C1A C2A -0.2(4) . . . . ?
N1A C1A C2A C3A -179.9(3) . . . . ?
C6A C1A C2A C3A 0.5(4) . . . . ?
C1A C2A C3A C4A -0.2(6) . . . . ?
C2A C3A C4A C5A -0.9(7) . . . . ?
C3A C4A C5A C6A 1.5(7) . . . . ?
N1A C1A C6A C5A -179.5(3) . . . . ?
C2A C1A C6A C5A 0.1(4) . . . . ?
N1A C1A C6A C7A 0.6(3) . . . . ?
C2A C1A C6A C7A -179.7(3) . . . . ?
C4A C5A C6A C1A -1.1(6) . . . . ?
C4A C5A C6A C7A 178.7(4) . . . . ?
C1A C6A C7A C8A -179.1(4) . . . . ?
C5A C6A C7A C8A 1.0(7) . . . . ?
C1A C6A C7A C12A 0.0(3) . . . . ?
C5A C6A C7A C12A -179.8(3) . . . . ?
C12A C7A C8A C9A 0.3(7) . . . . ?
C6A C7A C8A C9A 179.4(5) . . . . ?
C7A C8A C9A C10A -0.8(9) . . . . ?
C8A C9A C10A C11A 0.9(9) . . . . ?
C9A C10A C11A C12A -0.4(7) . . . . ?
C1A N1A C12A C11A 179.5(3) . . . . ?
C13A N1A C12A C11A -1.0(4) . . . . ?
C1A N1A C12A C7A 1.0(3) . . . . ?
C13A N1A C12A C7A -179.4(2) . . . . ?
C10A C11A C12A N1A -178.3(3) . . . . ?
C10A C11A C12A C7A 0.0(5) . . . . ?
C8A C7A C12A N1A 178.7(3) . . . . ?
C6A C7A C12A N1A -0.7(3) . . . . ?
C8A C7A C12A C11A 0.1(5) . . . . ?
C6A C7A C12A C11A -179.2(3) . . . . ?
C1A N1A C13A C14A 103.0(3) . . . . ?
C12A N1A C13A C14A -76.4(3) . . . . ?
N1A C13A C14A C21A 171.1(3) . . . . ?
N1A C13A C14A C15A -62.3(4) . . . . ?
C21A C14A C15A C20A 45.1(4) . . . . ?
C13A C14A C15A C20A -80.4(3) . . . . ?
C21A C14A C15A C16A -135.7(3) . . . . ?
C13A C14A C15A C16A 98.8(3) . . . . ?
C20A C15A C16A C17A -0.3(4) . . . . ?
C14A C15A C16A C17A -179.5(3) . . . . ?
C15A C16A C17A C18A -0.7(4) . . . . ?
C16A C17A C18A C19A 1.6(5) . . . . ?
C16A C17A C18A Cl1A -177.6(2) . . . . ?
C17A C18A C19A C20A -1.5(5) . . . . ?
Cl1A C18A C19A C20A 177.7(3) . . . . ?
C16A C15A C20A C19A 0.5(4) . . . . ?
C14A C15A C20A C19A 179.7(3) . . . . ?
C18A C19A C20A C15A 0.4(5) . . . . ?
C15A C14A C21A C22A -163.4(9) . . . . ?
C13A C14A C21A C22A -38.0(10) . . . . ?
 
_refine_diff_density_max    0.090
_refine_diff_density_min   -0.188
_refine_diff_density_rms    0.033

_shelx_res_file
;
TITL af432            P 43         R = 0.06 New:I41
    af432_pl.res
    created by SHELXL-2018/3 at 17:49:44 on 04-Aug-2020
CELL  0.71073   18.4165   18.4165   10.6556    90.000    90.000    90.000
ZERR        8    0.0002    0.0002    0.0003     0.000     0.000     0.000
LATT  -2
SYMM             - Y ,    0.50000 + X ,    0.25000 + Z
SYMM     0.50000 - X ,    0.50000 - Y ,    0.50000 + Z
SYMM     0.50000 + Y ,            - X ,    0.75000 + Z
SFAC  C  H Cl  N
UNIT   176  144   8   8
LIST 4 ! automatically inserted. Change 6 to 4 for CHECKCIF!!
TEMP    23
L.S. 25
FMAP 2
PLAN -20
ACTA
CONF
BOND $H
size 0.3 0.3 0.15
REM TWIN
REM BASF 0.06900
WGHT    0.091100    0.217000
FVAR       2.79245
RESI 0
CL1A  3   -0.414177   -1.080793    0.646775    11.00000    0.10929    0.18364 =
         0.20217   -0.04938    0.04035    0.00580
N1A   4   -0.103087   -0.982773    0.375243    11.00000    0.07313    0.06698 =
         0.14430    0.01337   -0.00520   -0.01339
C1A   1   -0.119089   -0.945793    0.484929    11.00000    0.05811    0.07088 =
         0.16253    0.00219   -0.00692   -0.01400
C2A   1   -0.125860   -0.971698    0.607656    11.00000    0.08243    0.09516 =
         0.16653    0.00114    0.00383   -0.01402
AFIX  43
H2A   2   -0.119371   -1.020612    0.626220    11.00000   -1.20000
AFIX   0
C3A   1   -0.142477   -0.922196    0.700022    11.00000    0.09280    0.14888 =
         0.17947   -0.03981    0.01105   -0.01827
AFIX  43
H3A   2   -0.147447   -0.937886    0.782534    11.00000   -1.20000
AFIX   0
C4A   1   -0.151828   -0.850051    0.672281    11.00000    0.10409    0.12159 =
         0.26638   -0.06367    0.00450   -0.00779
AFIX  43
H4A   2   -0.163696   -0.818289    0.736959    11.00000   -1.20000
AFIX   0
C5A   1   -0.144504   -0.823143    0.554695    11.00000    0.07856    0.08235 =
         0.30682   -0.02947   -0.02579   -0.00645
AFIX  43
H5A   2   -0.149991   -0.773825    0.538511    11.00000   -1.20000
AFIX   0
C6A   1   -0.128354   -0.872320    0.458257    11.00000    0.06689    0.07053 =
         0.21326   -0.00274   -0.02419   -0.01517
C7A   1   -0.118185   -0.864179    0.325024    11.00000    0.06822    0.08030 =
         0.24132    0.03994   -0.03346   -0.02162
C8A   1   -0.119066   -0.806765    0.240193    11.00000    0.11517    0.10770 =
         0.33090    0.09329   -0.06454   -0.03271
AFIX  43
H8A   2   -0.128549   -0.759874    0.268137    11.00000   -1.20000
AFIX   0
C9A   1   -0.105830   -0.819417    0.114210    11.00000    0.13492    0.18382 =
         0.30697    0.14914   -0.06322   -0.04776
AFIX  43
H9A   2   -0.107154   -0.780663    0.058301    11.00000   -1.20000
AFIX   0
C10A  1   -0.090582   -0.888721    0.069078    11.00000    0.11687    0.20027 =
         0.20683    0.09524   -0.03405   -0.04080
AFIX  43
H10A  2   -0.081280   -0.895388   -0.015930    11.00000   -1.20000
AFIX   0
C11A  1   -0.089124   -0.947540    0.149000    11.00000    0.08727    0.14951 =
         0.15767    0.04937   -0.02131   -0.02995
AFIX  43
H11A  2   -0.079334   -0.994123    0.119858    11.00000   -1.20000
AFIX   0
C12A  1   -0.103019   -0.934034    0.275817    11.00000    0.06411    0.09120 =
         0.15975    0.03389   -0.01665   -0.02140
C13A  1   -0.088955   -1.059805    0.361930    11.00000    0.06243    0.07550 =
         0.14897    0.01017   -0.00009   -0.00622
AFIX  23
H13A  2   -0.076913   -1.079925    0.443443    11.00000   -1.20000
H13B  2   -0.047345   -1.066629    0.307380    11.00000   -1.20000
AFIX   0
C14A  1   -0.154539   -1.101402    0.307215    11.00000    0.07126    0.07296 =
         0.14198    0.00075   -0.00264   -0.00829
AFIX  13
H14A  2   -0.167808   -1.077433    0.228370    11.00000   -1.20000
AFIX   0
C15A  1   -0.219281   -1.096011    0.393393    11.00000    0.06335    0.05574 =
         0.13572   -0.00370   -0.00666   -0.00828
C16A  1   -0.273330   -1.045961    0.369397    11.00000    0.08200    0.06003 =
         0.14624    0.00460   -0.01526    0.00046
AFIX  43
H16A  2   -0.269821   -1.015845    0.299601    11.00000   -1.20000
AFIX   0
C17A  1   -0.333058   -1.040226    0.448900    11.00000    0.07780    0.07126 =
         0.18371   -0.02094   -0.01115    0.01047
AFIX  43
H17A  2   -0.369197   -1.006137    0.433254    11.00000   -1.20000
AFIX   0
C18A  1   -0.337797   -1.085603    0.550625    11.00000    0.07969    0.09036 =
         0.15017   -0.02447    0.00746   -0.00539
C19A  1   -0.284396   -1.134815    0.576952    11.00000    0.08523    0.09545 =
         0.14754    0.01260    0.00148   -0.00825
AFIX  43
H19A  2   -0.287619   -1.164562    0.647258    11.00000   -1.20000
AFIX   0
C20A  1   -0.225848   -1.139454    0.497449    11.00000    0.06661    0.07801 =
         0.16788    0.01941   -0.00489    0.00340
AFIX  43
H20A  2   -0.189522   -1.173088    0.514676    11.00000   -1.20000
AFIX   0
C21A  1   -0.134302   -1.178445    0.275707    11.00000    0.10248    0.08343 =
         0.20811   -0.02094    0.03431   -0.00666
AFIX  43
H21A  2   -0.171454   -1.210994    0.293866    11.00000   -1.20000
AFIX   0
C22A  1   -0.084527   -1.206511    0.235031    11.00000    0.17371    0.09986 =
         0.33333   -0.01654    0.11140   -0.00257
AFIX  93
H22A  2   -0.043851   -1.179380    0.213209    11.00000   -1.20000
H22B  2   -0.084531   -1.256575    0.223615    11.00000   -1.20000
AFIX   0
HKLF 4 1 0.0000 1.0000 0.0000 -1.0000 0.0000 0.0000 0.0000 0.0000 1.0000


REM  af432            P 43         R = 0.06 New:I41
REM wR2 = 0.1805, GooF = S = 0.998, Restrained GooF = 0.998 for all data
REM R1 = 0.0501 for 3275 Fo > 4sig(Fo) and 0.0888 for all 6115 data
REM 217 parameters refined using 1 restraints

END

WGHT      0.0826      0.2497

REM Highest difference peak  0.090,  deepest hole -0.188,  1-sigma level  0.033
Q1    1  -0.5000 -1.0000  0.6738  10.50000  0.05    0.09
Q2    1  -0.4831 -1.0212  0.5242  11.00000  0.05    0.09
Q3    1  -0.4472 -1.0043  0.7826  11.00000  0.05    0.08
Q4    1  -0.1621 -1.2084  0.1593  11.00000  0.05    0.08
Q5    1  -0.5000 -1.0000  0.7921  10.50000  0.05    0.08
Q6    1   0.0000 -1.0000  0.1345  10.50000  0.05    0.08
Q7    1  -0.4236 -1.0234  0.4381  11.00000  0.05    0.08
Q8    1   0.0123 -0.9604  0.1610  11.00000  0.05    0.08
Q9    1  -0.4944 -1.0398  0.5474  11.00000  0.05    0.08
Q10   1  -0.2251 -0.7819  0.5763  11.00000  0.05    0.08
Q11   1   0.0001 -1.0791  0.4810  11.00000  0.05    0.08
Q12   1  -0.0388 -1.0308  0.6730  11.00000  0.05    0.08
Q13   1  -0.0384 -0.7581  0.2884  11.00000  0.05    0.07
Q14   1  -0.0186 -0.9888  0.5715  11.00000  0.05    0.07
Q15   1  -0.2600 -0.9594  0.3259  11.00000  0.05    0.07
Q16   1  -0.2376 -0.7771  0.4050  11.00000  0.05    0.07
Q17   1  -0.2331 -0.9527  0.6021  11.00000  0.05    0.07
Q18   1  -0.1510 -0.7650  0.4791  11.00000  0.05    0.07
Q19   1  -0.2346 -0.9773  0.3177  11.00000  0.05    0.07
Q20   1   0.0021 -0.8039  0.4072  11.00000  0.05    0.07
;
_shelx_res_checksum    5078

_shelx_hkl_file
;
   0   0 -15 15.4860 32.5040   2
   0   0 -15-35.5267 34.7897   1
   0   0 -14 32.7827 34.3109   1
   0   0 -14-18.2384 32.3738   2
   0   0 -14-51.7484 33.8820   6
   0   0 -13 53.7166 27.4951   6
   0   0 -13-3.38413 31.1629   2
   0   0 -13 18.6833 32.0773   1
   0   0 -12-16.9611 29.7602   1
   0   0 -12-15.5213 26.7309   2
   0   0 -12-25.8921 27.0676   6
   0   0 -11-21.2690 29.6127   1
   0   0 -11-11.8026 24.4215   6
   0   0 -11-5.48243 20.6947   8
   0   0 -10-8.49806 20.9367   8
   0   0 -10-2.70208 27.4687   1
   0   0 -10-38.4092 24.5425   6
   0   0  -9-12.4082 19.7980   8
   0   0  -9-16.2388 14.6088   4
   0   0  -9 7.14651 25.3558   1
   0   0  -9-13.3412 23.5886   6
   0   0  -8 687.802 68.7617   8
   0   0  -8 679.939 66.8107   4
   0   0  -8 700.215 71.7130   1
   0   0  -8 696.226 70.0469   6
   0   0  -7 3.68667 12.5873   8
   0   0  -7 21.3224 14.8587   1
   0   0  -7 7.34994 14.0764   6
   0   0  -7 16.4354 8.57727   4
   0   0  -6-2.11682 9.78374   8
   0   0  -6-1.38186 6.87708   4
   0   0  -5 9.69966 14.2977   8
   0   0  -5 21.8792 9.76246   4
   0   0  -5 13.4655 15.0032   6
   0   0  -4 40745.7 3769.51   4
   0   0  -4 40703.1 3769.99   5
   0   0  -4 39734.5 3770.12   8
   0   0  -4 41816.0 3770.10   8
   0   0  -4 40912.4 3770.50   6
   0   0  -3-6.05243 5.33070   8
   0   0  -3 0.65857 5.58465   3
   0   0  -3-0.49483 5.49257   5
   0   0  -3-0.55907 5.56928   7
   0   0  -3-5.48982 6.65062   6
   0   0  -3-0.52891 5.87063   8
   0   0  -3-1.09544 3.99829   4
   0   0  -3-6.30331 5.53773   2
   0   0  -3 5.00264 7.04956   1
   0   0  -3 9.78447 6.58638   6
   0   0  -2 23.0869 5.31969   5
   0   0  -2 7.72479 4.82056   8
   0   0  -2 5.65140 4.94500   7
   0   0  -2 21.7276 5.84783   6
   0   0  -2 11.4324 3.59612   4
   0   0  -2 19.6722 4.95489   2
   0   0  -2 17.8545 5.88373   6
   0   0   2 22.5929 5.29496   1
   0   0   2 15.0674 5.54862   5
   0   0   2 7.89691 5.06752   3
   0   0   2 8.22730 3.11657   4
   0   0   2 12.7116 5.50463   7
   0   0   3 3.01634 6.74686   7
   0   0   3 2.25763 6.47933   5
   0   0   3 5.78954 5.66810   2
   0   0   3-0.72635 6.03392   1
   0   0   3-1.95938 3.79826   4
   0   0   3-0.70362 6.48029   3
   0   0   4 37658.8 3614.24   3
   0   0   4 39952.9 3613.17   4
   0   0   4 38472.6 3613.91   7
   0   0   4 41867.5 3614.01   5
   0   0   4 38452.2 3614.38   1
   0   0   4 37416.4 3613.99   2
   0   0   5 25.9484 15.8762   1
   0   0   5 54.0433 16.8516   2
   0   0   5 21.7089 16.7148   3
   0   0   5 23.2304 14.4270   5
   0   0   5 32.4757 15.1953   7
   0   0   5 9.91645 9.84435   4
   0   0   6-14.1633 11.5843   5
   0   0   6 3.98986 7.87167   4
   0   0   6 6.39763 12.2099   7
   0   0   6 16.1450 12.5683   3
   0   0   6-1.33440 11.5012   2
   0   0   7-3.04538 14.7575   7
   0   0   7 4.71611 13.8941   2
   0   0   7-5.21196 15.8644   3
   0   0   7-2.79350 14.2437   5
   0   0   8 657.651 67.6459   7
   0   0   8 610.203 68.7141   3
   0   0   8 626.079 67.7705   2
   0   0   8 740.961 68.2546   5
   0   0   9 14.1804 25.3585   7
   0   0   9-22.7826 23.5150   2
   0   0   9 21.7594 22.6986   5
   0   0   9-16.0296 28.0897   3
   0   0  10-20.6525 26.7628   3
   0   0  10 4.65617 24.6180   2
   0   0  10-25.1672 27.3108   7
   0   0  10-2.00331 23.3482   5
   0   0  11-11.5276 28.9830   3
   0   0  11-2.57100 26.3428   7
   0   0  11-4.33818 23.8415   5
   0   0  12 9.53913 28.5312   3
   0   0  12-14.2248 29.5423   7
   0   0  13-24.3027 34.1022   3
   0   0  13-6.19132 30.8637   7
   0   0  14-56.3323 38.0310   3
   0   0  15 56.4949 40.5279   3
   0  -1 -15 53.9088 34.0541   2
  -1   0 -15 4.54491 38.1653   1
   1   0 -15-13.0009 34.8779   1
   1   0 -15 52.1837 32.0441   2
  -1   0 -15 55.9227 32.8575   2
   0   1 -15 8.92737 35.1168   1
   0   1 -15-46.8513 34.7388   2
   0  -1 -15-4.43674 36.1007   1
   0   1 -14 11.0955 32.7070   2
   0   1 -14-4.10519 34.8232   1
  -1   0 -14 48.9078 29.8716   6
   0  -1 -14-40.9547 36.9821   1
  -1   0 -14 46.0317 36.4303   1
   0  -1 -14-3.58699 30.1272   2
   1   0 -14 40.0382 34.6362   1
   1   0 -14 14.1654 32.9097   2
   0  -1 -14 3.16656 30.4739   6
  -1   0 -14 11.2949 33.3960   2
   0   1 -13-16.1923 26.4244   6
   1   0 -13 10.9728 30.9102   1
   1   0 -13 28.1965 28.2897   6
   0  -1 -13 59.5072 32.0430   2
  -1   0 -13-2.82848 28.7807   6
   0   1 -13-14.9719 32.0531   1
   0  -1 -13 22.5680 30.7017   1
   0  -1 -13-35.2794 29.7758   6
  -1   0 -13 17.4592 32.1625   2
   0   1 -13 3.46975 32.3180   2
   1   0 -13 13.1380 30.8455   2
  -1   0 -13 3.80961 32.4098   1
   0   1 -12 3.37269 31.4115   1
   1   0 -12-15.6196 26.4865   6
   0  -1 -12-30.6576 32.5045   1
   1   0 -12 3.01128 27.8124   2
  -1   0 -12 25.6306 30.8121   2
   0  -1 -12 32.4582 27.8995   6
   1   0 -12-13.2536 30.6025   1
   0   1 -12-7.42297 23.9199   6
   0   1 -12 19.2126 28.8174   2
  -1   0 -12 13.8114 31.3483   1
  -1   0 -12-2.59677 27.6164   6
   0  -1 -12 14.6499 22.6782   8
  -1   0 -11-6.17487 30.0019   1
   0   1 -11 12.1026 28.1049   1
   1   0 -11 14.9066 27.0710   1
   0   1 -11-2.91799 27.4046   2
   0  -1 -11 4.96489 24.7293   6
   0  -1 -11 6.15419 29.9772   1
   0   1 -11 1.68137 19.7931   8
   0   1 -11 4.47586 22.2408   6
   1   0 -11-38.1363 26.9654   6
  -1   0 -11-17.5521 20.3376   8
  -1   0 -11-40.0303 26.3893   6
   1   0 -11 7.68799 21.1269   8
  -1   0 -10 48.3325 21.8739   8
   0   1 -10 8.02820 30.0198   1
   0   1 -10 2.63057 28.1889   2
   1   0 -10 29.2724 28.1561   1
   0  -1 -10 41.2547 28.7212   1
   0   1 -10-1.55348 18.5892   8
  -1   0 -10 63.0737 30.1701   1
   1   0 -10 17.8967 22.7889   8
   0  -1 -10 33.7455 27.1915   6
   0  -1 -10 33.0832 22.8057   8
   0   1 -10-6.03749 24.2131   6
   1   0 -10-6.48066 25.3748   6
  -1   0 -10-27.4918 24.1425   6
   0   1  -9 310.429 34.3996   8
   0  -1  -9 297.163 40.8575   1
   1   0  -9 268.253 32.1481   4
  -1   0  -9 276.113 35.2977   8
   0   1  -9 290.207 36.8647   6
   0  -1  -9 241.496 30.6656   4
   0   1  -9 328.541 41.3638   1
  -1   0  -9 241.865 36.7222   6
   0   1  -9 275.025 31.2051   4
  -1   0  -9 270.498 40.9513   1
  -1   0  -9 222.421 29.4573   4
   1   0  -9 281.670 40.4990   1
   1   0  -9 289.085 38.1099   6
   0  -1  -9 291.491 36.2338   8
   1   0  -9 304.658 36.2532   8
   0  -1  -9 329.974 38.6489   6
   0  -1  -8 68.4862 20.1975   6
   0   1  -8 106.828 20.0889   6
   0  -1  -8 47.3625 17.9998   8
   1   0  -8 137.121 23.4031   1
   0   1  -8 77.3472 17.2635   8
   1   0  -8 67.1572 21.2283   6
   1   0  -8 70.9464 18.2946   8
  -1   0  -8 46.7790 12.4707   4
  -1   0  -8 132.304 23.9154   1
   0   1  -8 138.315 24.1097   1
  -1   0  -8 81.8670 16.8737   8
   0  -1  -8 89.2743 13.8819   4
  -1   0  -8 76.7357 20.1822   6
   1   0  -8 59.8694 15.0132   4
   0  -1  -7 325.353 34.7801   6
   0  -1  -7 266.343 29.9825   4
  -1   0  -7 323.090 33.8666   6
  -1   0  -7 303.120 31.8674   8
   0  -1  -7 256.272 32.5077   8
   0   1  -7 321.359 35.4411   1
   1   0  -7 246.601 32.3554   8
  -1   0  -7 285.604 29.4632   4
   0   1  -7 266.320 32.6812   6
   1   0  -7 268.938 33.4978   6
  -1   0  -7 323.451 29.5199   4
  -1   0  -7 284.685 34.3382   1
   0   1  -7 290.240 31.7614   8
   0  -1  -6-9.16492 7.23858   4
  -1   0  -6-6.04997 12.9930   1
  -1   0  -6-4.95138 11.8423   6
  -1   0  -6-2.26756 6.02854   4
   0   1  -6 7.52735 8.61642   8
   0  -1  -6 6.75870 12.6582   6
   1   0  -6 4.53184 10.8105   8
  -1   0  -6-2.99873 10.1930   8
   0  -1  -6-2.34559 10.7704   8
   0  -1  -6-0.72132 7.71939   4
   0   1  -6 12.7843 6.78185   4
   1   0  -6-6.33163 11.6953   6
   0   1  -6-5.81393 12.8063   1
   0   1  -6-4.59585 10.4914   6
  -1   0  -6 1.10414 5.99402   4
   0  -1  -5 6429.80 638.412   4
   1   0  -5 7145.73 639.640   8
   0  -1  -5 6895.92 638.549   4
  -1   0  -5 7021.99 639.851   6
   0  -1  -5 6955.40 640.120   6
   0   1  -5 6946.10 640.320   1
  -1   0  -5 6741.19 638.068   4
   0   1  -5 7391.10 639.730   6
   0   1  -5 7018.82 638.449   4
   0   1  -5 6887.85 639.027   8
   0  -1  -5 6568.93 639.613   8
   1   0  -5 7215.61 640.045   6
  -1   0  -5 6928.12 639.200   8
   0   1  -5 6962.17 639.041   8
   1   0  -5 6802.25 638.807   4
   0   1  -4 447.971 45.0590   8
   1   0  -4 438.377 44.8203   4
  -1   0  -4 465.751 43.9726   4
   1   0  -4 459.780 45.7997   8
  -1   0  -4 434.241 45.2860   8
  -1   0  -4 454.572 46.1375   6
   1   0  -4 482.260 45.6068   8
  -1   0  -4 471.375 45.2061   5
   0  -1  -4 463.217 45.8593   8
   0   1  -4 475.346 44.3937   4
   0  -1  -4 452.021 44.4456   4
   0   1  -4 476.858 45.8374   6
   0  -1  -4 425.138 45.1469   7
   0  -1  -4 440.403 44.4539   4
   1   0  -4 456.029 46.1053   6
   0  -1  -4 488.798 46.5797   6
   0   1  -4 436.017 45.6029   6
   0   1  -4 396.305 44.8774   8
   1   0  -4 514.320 45.7810   5
   0  -1  -4 457.910 44.9615   5
   0  -1  -3 18894.6 1781.73   7
   1   0  -3 18502.7 1782.15   3
   0  -1  -3 20085.7 1782.15   8
  -1   0  -3 19265.7 1781.73   5
   0  -1  -3 19115.0 1782.18   8
   0   1  -3 19929.2 1781.99   6
   0  -1  -3 20227.7 1782.41   6
   1   0  -3 21186.4 1782.22   6
  -1   0  -3 19213.3 1781.96   7
   0  -1  -3 18425.3 1781.46   4
   0   1  -3 19119.2 1781.40   4
  -1   0  -3 18882.8 1781.11   4
   1   0  -3 19275.4 1782.37   1
   0  -1  -3 19676.2 1782.45   6
  -1   0  -3 18061.9 1782.22   2
   1   0  -3 21263.0 1782.18   5
   0   1  -3 19004.0 1782.17   2
   0   1  -3 19536.0 1782.20   7
   1   0  -3 19518.1 1782.08   7
   0  -1  -3 19435.5 1781.59   5
  -1   0  -3 19614.3 1781.83   8
   0   1  -3 20557.1 1781.65   8
   1   0  -3 18563.1 1781.98   2
   0   1  -3 18954.0 1782.28   1
  -1   0  -3 19503.7 1782.20   6
   1   0  -3 20436.7 1782.10   8
   0   1  -3 19269.0 1781.64   8
   1   0  -3 19111.0 1781.75   4
   0   1  -3 19486.0 1782.34   1
   0  -1  -3 18245.4 1782.11   2
   0  -1  -3 17844.9 1781.43   4
   0   1  -3 19756.9 1782.04   5
   0  -1  -3 17867.9 1782.14   3
  -1   0  -2 632.566 59.4060   5
   0  -1  -2 585.097 59.1282   4
  -1   0  -2 547.894 59.6579   6
   0   1  -2 620.989 59.7714   5
   0   1  -2 889.664 60.2661   1
   0  -1  -2 543.605 59.7120   8
   0  -1  -2 564.267 59.2433   7
   0   1  -2 611.115 59.1257   4
   0   1  -2 548.658 59.0600   8
   0  -1  -2 615.778 59.2188   4
   0  -1  -2 586.726 59.1841   5
   1   0  -2 1069.19 60.6991   1
   0  -1  -2 726.650 59.8805   3
   1   0  -2 582.392 59.6125   7
   0   1  -2 988.408 60.3593   2
  -1   0  -2 576.042 59.3704   8
  -1   0  -2 582.902 59.4770   7
   1   0  -2 539.189 59.4855   8
   1   0  -2 734.165 59.8655   3
   0   1  -2 556.499 59.0999   8
   1   0  -2 600.112 59.6906   5
   0  -1  -2 958.092 60.3776   2
   0   1  -2 578.196 59.3714   6
   1   0  -2 593.666 59.4346   4
   1   0  -2 571.971 59.5457   6
   1   0  -2 946.497 59.9884   2
  -1   0   2 715.808 61.5270   3
   0  -1   2 961.477 61.9138   2
   0  -1   2 629.018 61.6272   5
  -1   0   2 921.478 61.5813   2
   0   1   2 964.396 62.1265   2
   0   1   2 554.658 61.2830   8
   1   0   2 607.890 61.4303   6
   0   1   2 571.673 61.0247   7
  -1   0   2 1038.14 62.2006   1
  -1   0   2 526.270 61.0773   8
   0  -1   2 547.406 61.4814   7
  -1   0   2 592.061 61.3351   5
   0   1   2 946.880 62.3600   1
  -1   0   2 556.543 61.2172   6
   0   1   2 749.439 61.7572   3
  -1   0   2 532.534 61.2698   7
   0  -1   2 623.408 60.8372   4
   0  -1   2 584.799 61.1086   6
   1   0   2 563.250 61.2374   7
   1   0   2 586.298 61.0797   5
   1   0   2 563.482 61.0724   8
   1   0   2 921.148 62.1035   2
  -1   0   2 605.432 61.1404   4
   0   1   2 594.186 60.9060   5
  -1   0   3 19722.1 1309.29   4
   0  -1   3 19761.2 1310.01   7
   1   0   3 19835.5 1309.71   7
  -1   0   3 21875.2 1309.90   5
  -1   0   3 19446.9 1310.00   1
   0  -1   3 19912.8 1308.83   4
   0  -1   3 21968.2 1310.17   5
   0  -1   3 19264.0 1309.96   3
   1   0   3 19726.3 1309.30   8
  -1   0   3 19356.8 1309.54   2
   0   1   3 19714.6 1309.98   2
  -1   0   3 20214.3 1309.42   8
   1   0   3 21637.1 1310.00   6
   0   1   3 19224.5 1310.26   1
   0  -1   3 18547.1 1309.66   2
   1   0   3 19364.9 1310.02   2
   0   1   3 19346.3 1309.39   7
  -1   0   3 18764.4 1309.79   3
  -1   0   3 20019.6 1309.78   7
   0   1   3 19609.2 1310.15   3
  -1   0   3 20968.5 1309.87   6
   0   1   3 21263.6 1309.25   5
   1   0   3 20838.5 1309.46   5
   0  -1   4 676.732 51.9102   2
   1   0   4 477.018 49.4387   4
  -1   0   4 487.006 50.4581   4
   0  -1   4 451.679 49.8852   4
   0  -1   4 406.207 51.4658   7
  -1   0   4 459.475 51.0301   5
   0  -1   4 560.276 52.1525   3
   1   0   4 434.911 51.0149   7
   0   1   4 722.476 53.2561   1
   0   1   4 763.287 52.8007   2
   0   1   4 469.372 50.9112   7
   0   1   4 543.884 52.2046   3
   1   0   4 778.528 53.4500   1
   0   1   4 466.229 50.4065   5
   1   0   4 378.758 50.2018   8
   0  -1   4 441.662 51.3245   5
  -1   0   4 687.066 51.9515   2
  -1   0   4 810.099 53.1803   1
   1   0   4 562.924 52.5484   3
   1   0   4 737.552 52.7690   2
   1   0   4 480.927 50.6719   5
  -1   0   4 582.723 51.9599   3
  -1   0   4 421.396 51.0724   7
   0  -1   5 6868.21 641.459   4
   1   0   5 7682.74 642.671   5
  -1   0   5 6920.34 641.894   4
   0  -1   5 6938.48 643.111   3
   0  -1   5 6993.82 642.895   7
   0   1   5 6764.44 642.881   2
  -1   0   5 6374.43 642.820   3
   1   0   5 6560.47 643.236   3
   0  -1   5 7958.82 643.261   5
   0   1   5 7305.33 642.241   5
   0   1   5 6924.59 642.382   7
  -1   0   5 7556.54 642.734   5
  -1   0   5 6869.45 643.119   1
   1   0   5 6771.27 642.690   7
  -1   0   5 7098.33 642.683   7
   1   0   5 6456.68 642.818   2
   0  -1   5 6589.38 642.674   2
  -1   0   5 6547.49 642.476   2
   0   1   5 6579.91 643.179   3
   0   1   5 6640.80 643.289   1
   0  -1   6 3.89096 11.9827   5
   0   1   6 11.8830 11.8963   7
   0   1   6 8.46865 9.64366   5
   1   0   6-2.80179 13.4060   2
  -1   0   6-3.77733 11.6330   2
  -1   0   6 2.82239 13.0737   3
  -1   0   6 3.70497 9.14102   4
   0   1   6 9.57568 11.7938   2
   0  -1   6 13.5954 12.2388   7
   1   0   6-11.5887 11.2068   5
  -1   0   6-1.46114 13.4603   1
   0  -1   6 1.44867 13.2700   3
  -1   0   6 5.08888 12.3964   7
   0  -1   6 5.19743 11.1666   2
   1   0   6-1.29948 12.2724   7
   0   1   6 5.98714 12.8620   3
  -1   0   6 9.76251 12.3038   5
   1   0   6 7.65475 13.2405   3
   0  -1   6 3.06109 7.55457   4
   0   1   6 3.04726 13.5107   1
   0   1   7 279.944 34.7605   2
   0  -1   7 320.575 35.0546   5
   1   0   7 306.645 35.3358   7
   0   1   7 267.412 33.3364   5
  -1   0   7 305.393 34.4899   2
  -1   0   7 316.313 34.6153   5
   1   0   7 373.695 34.7254   5
   0  -1   7 270.089 34.9448   7
   0   1   7 309.160 34.4882   7
   0  -1   7 270.168 35.2779   3
  -1   0   7 286.498 32.1653   4
   1   0   7 295.317 35.3238   2
   1   0   7 280.424 35.4867   3
   0  -1   7 323.984 34.9056   2
  -1   0   7 346.475 35.5131   7
   0   1   7 280.480 35.6491   3
   0   1   7 359.563 36.7112   1
  -1   0   7 275.202 34.9298   3
   0  -1   7 275.794 31.2335   4
  -1   0   8 64.4731 20.5608   5
  -1   0   8 79.7836 22.2622   3
   0  -1   8 69.9216 15.1256   4
   0  -1   8 73.2514 21.1009   5
   1   0   8 73.5300 22.5486   7
   0   1   8 146.986 22.8121   2
  -1   0   8 44.2002 20.7407   7
  -1   0   8 135.654 21.5944   2
   0  -1   8 155.549 22.5908   2
   0   1   8 69.0020 19.9750   7
   0   1   8 73.4361 23.1899   3
   1   0   8 141.183 24.2417   3
   0  -1   8 94.9633 22.6814   7
   1   0   8 47.6695 19.8352   5
   0  -1   8 109.323 22.9228   3
   1   0   8 102.091 22.2250   2
   0   1   8 118.578 19.6076   5
   1   0   9 302.248 39.9663   2
   0  -1   9 292.647 39.8837   7
   1   0   9 276.213 41.4110   3
  -1   0   9 256.499 40.6686   3
   0   1   9 307.540 36.8593   5
   1   0   9 278.874 40.0515   7
   0   1   9 264.771 41.5715   3
   0  -1   9 260.289 40.8113   3
   0  -1   9 289.327 38.5129   5
  -1   0   9 260.289 38.2444   2
  -1   0   9 276.584 37.7096   5
   0   1   9 318.495 38.9245   7
   0   1   9 263.570 38.6122   2
   1   0   9 293.881 37.2208   5
  -1   0   9 280.483 38.9912   7
   1   0  10 6.93638 27.0327   7
  -1   0  10-2.28022 27.0337   7
   1   0  10 14.4142 26.1940   2
   0  -1  10 6.50705 25.2841   5
   1   0  10 26.4236 24.7304   5
  -1   0  10 58.7204 27.1407   2
   0  -1  10 20.6533 28.3592   3
   1   0  10 26.4207 28.9604   3
   0   1  10 37.6677 25.6737   2
   0   1  10 57.4150 29.2853   3
   0   1  10 17.4950 25.7588   7
  -1   0  10 70.6549 28.5907   3
   0  -1  10 66.8799 28.9293   7
  -1   0  10-4.00036 23.6610   5
   0   1  10 20.0564 22.2097   5
   0   1  11-2.88221 27.8684   3
   1   0  11 8.82017 27.8384   3
   1   0  11-20.6982 27.8112   7
   0  -1  11 35.3463 25.6442   5
  -1   0  11-32.5237 23.5020   5
  -1   0  11 7.66236 25.3844   7
   1   0  11 2.68767 25.7206   2
   1   0  11-13.0776 24.1962   5
   0  -1  11-25.9431 30.0707   3
   0  -1  11 16.0715 26.9415   7
   0   1  11-32.0238 26.5349   7
  -1   0  11-19.7295 28.8802   3
   0   1  11 2.61097 25.6324   2
   0   1  12-3.17948 30.5110   3
   1   0  12 25.7698 28.3246   7
   0  -1  12 14.7935 30.3231   7
   0   1  12 14.4598 25.3389   2
  -1   0  12-12.4456 28.8306   3
  -1   0  12 14.0264 29.8463   7
   0   1  12-16.3719 29.3981   7
   0  -1  12 41.3481 32.7440   3
   1   0  12 19.4676 30.7276   3
   0  -1  13-32.1629 33.4348   7
   0   1  13 14.8706 31.3995   7
   0  -1  13-41.6872 33.1863   3
  -1   0  13 27.5443 31.9596   7
  -1   0  13-61.1838 33.3976   3
   1   0  13-3.54286 30.9662   3
   0   1  13-13.8962 32.5717   3
   1   0  13-25.1249 30.8639   7
   1   0  14-11.3897 33.5556   3
   0  -1  14-3.46885 35.2931   7
   1   0  14-23.6706 35.3473   7
   0   1  14-22.5317 34.8784   3
  -1   0  14 29.5280 34.8481   3
   0  -1  14 11.3113 36.6354   3
   1   0  15-8.15398 38.0829   3
   0  -1  15 12.1766 38.4306   3
  -1   0  15 23.8439 38.6198   3
   0   1  15 8.04212 36.6207   3
   1   1 -15 11.4878 33.5296   2
   1   1 -15-56.5651 38.0995   1
   1  -1 -15-14.9354 32.7963   2
  -1   1 -15-23.0333 41.4557   1
  -1  -1 -15-7.95116 34.7019   2
  -1   1 -15 44.2850 36.5496   2
  -1  -1 -15 31.7423 36.4722   1
   1  -1 -15 25.9954 35.8647   1
  -1   1 -14-59.0272 36.5818   1
  -1  -1 -14 6.34906 29.7417   6
  -1  -1 -14 58.5064 38.2801   1
   1  -1 -14-4.00456 34.3012   1
   1  -1 -14-25.1961 32.2034   6
   1   1 -14-28.0607 36.4046   1
  -1   1 -14 15.2482 32.6536   2
  -1  -1 -14 25.9174 32.5336   2
   1  -1 -14-48.6843 32.3092   2
   1   1 -14 3.56339 32.5510   2
   1  -1 -13-32.2807 30.1356   6
  -1   1 -13-15.3254 31.3855   1
  -1   1 -13 2.70623 27.6645   6
  -1  -1 -13-30.7489 30.1995   2
   1   1 -13 45.9491 27.9454   6
   1  -1 -13-14.6783 30.2746   1
   1  -1 -13 3.20476 28.5874   2
  -1  -1 -13-7.66377 32.0553   1
  -1   1 -13 14.3000 32.0805   2
   1   1 -13-21.9707 30.5277   1
   1   1 -13-3.34307 31.1386   2
  -1  -1 -13-8.85113 29.6011   6
   1   1 -12 19.8021 26.2110   6
  -1   1 -12-31.0766 30.9813   1
   1  -1 -12 27.2600 27.0841   6
  -1  -1 -12 5.41208 26.0909   6
   1   1 -12 15.5347 28.4516   2
   1  -1 -12-21.7913 23.7075   8
  -1   1 -12-4.94888 25.6363   6
  -1  -1 -12-10.4067 29.7025   1
  -1   1 -12 9.89897 27.4097   2
   1  -1 -12 10.0283 29.9925   1
   1   1 -12-13.2270 31.4692   1
   1   1 -11 5.67263 27.5634   2
  -1  -1 -11-24.6866 21.9249   8
   1   1 -11 26.7255 27.5078   1
  -1  -1 -11 18.7202 29.3818   1
  -1   1 -11 51.1215 27.7785   2
   1  -1 -11 35.0359 26.4494   6
   1   1 -11-29.3324 23.3835   6
   1  -1 -11 26.8325 21.4871   8
  -1  -1 -11 17.2409 25.2375   6
  -1   1 -11 13.4687 23.6754   6
   1  -1 -11-9.07338 29.4655   1
   1   1 -11-3.53779 19.4849   8
  -1   1 -11-3.07848 29.1469   1
  -1   1 -10 116.514 27.3355   6
   1  -1 -10 42.4058 25.8427   8
   1   1 -10 105.169 32.0624   1
  -1  -1 -10 98.5261 25.5456   8
  -1   1 -10 79.1718 31.3967   1
  -1   1 -10 95.6931 22.4083   8
   1   1 -10 94.5133 31.5039   2
   1  -1 -10 66.2053 27.9732   6
   1  -1 -10 54.1433 30.1762   1
   1   1 -10 93.5430 27.3559   6
   1   1 -10 90.7548 23.2287   8
  -1  -1 -10 114.229 32.5777   1
  -1  -1 -10 46.8459 28.3256   6
  -1  -1  -9 95.9784 16.5156   4
   1  -1  -9 94.8332 27.9374   6
  -1   1  -9 107.244 17.7569   4
  -1  -1  -9 224.495 33.4333   1
  -1   1  -9 87.1874 26.6193   6
   1   1  -9 177.673 30.3444   1
   1   1  -9 92.6478 25.1361   6
   1  -1  -9 87.6995 19.4048   4
  -1  -1  -9 82.0456 24.3199   8
   1  -1  -9 165.490 30.5758   1
  -1   1  -9 105.477 22.3585   8
   1  -1  -9 65.4724 23.3299   8
   1   1  -9 103.908 23.3945   8
  -1  -1  -9 56.0422 27.4683   6
  -1   1  -9 198.061 31.7959   1
   1   1  -8 167.669 20.3612   8
  -1  -1  -8 124.066 23.8127   6
  -1  -1  -8 87.0517 14.9618   4
  -1   1  -8 88.8861 23.2372   1
   1  -1  -8 128.313 21.7444   8
   1  -1  -8 124.850 17.3677   4
   1   1  -8 108.104 23.5261   1
  -1   1  -8 105.897 15.4794   4
  -1  -1  -8 99.7683 20.3591   8
   1  -1  -8 118.879 23.6968   6
  -1   1  -8 131.305 21.6192   6
  -1  -1  -8 107.389 23.7337   1
  -1   1  -8 97.5497 18.3801   8
   1   1  -8 140.875 22.7077   6
   1  -1  -7 52.4019 17.6586   6
  -1   1  -7 45.5336 10.0894   4
  -1   1  -7 98.9139 20.1223   1
   1   1  -7 61.6682 14.3974   8
  -1   1  -7 44.5249 13.6548   8
   1  -1  -7 64.1959 12.7171   4
  -1  -1  -7 34.5775 14.8324   8
  -1  -1  -7 58.9833 17.1615   6
  -1  -1  -7 65.7246 10.6796   4
  -1  -1  -7 55.4774 10.3710   4
   1   1  -7 97.3322 18.5430   1
  -1   1  -7 59.4912 16.0604   6
   1   1  -7 37.4751 15.9299   6
   1  -1  -7 42.7357 15.6361   8
   1   1  -6 309.007 33.4479   1
  -1  -1  -6 309.822 33.4964   6
  -1   1  -6 305.660 32.3551   6
   1   1  -6 236.377 30.8425   8
  -1   1  -6 305.429 34.1732   1
  -1  -1  -6 289.244 29.4752   4
  -1   1  -6 332.249 31.3512   8
   1   1  -6 244.243 31.9703   6
   1  -1  -6 313.915 30.9455   4
  -1  -1  -6 329.064 29.7959   4
   1  -1  -6 320.327 33.5648   6
  -1  -1  -6 297.435 32.2296   8
   1  -1  -6 296.775 32.7288   8
  -1   1  -6 280.878 29.3569   4
  -1   1  -5 396.991 37.9739   4
   1  -1  -5 393.651 41.6719   8
  -1   1  -5 316.758 39.0145   8
  -1   1  -5 365.798 39.1943   8
  -1   1  -5 388.208 40.5540   6
   1   1  -5 635.827 43.3614   1
  -1  -1  -5 364.076 37.8281   4
   1   1  -5 405.365 39.1751   4
  -1  -1  -5 402.113 38.2324   4
  -1  -1  -5 344.841 40.6687   8
   1   1  -5 344.659 40.0444   8
  -1   1  -5 608.698 43.5457   1
  -1  -1  -5 398.608 42.2614   6
   1  -1  -5 433.457 39.3379   4
  -1  -1  -5 340.708 39.1847   5
   1  -1  -5 422.595 41.8847   6
   1   1  -5 370.634 40.3697   6
  -1   1  -4 1792.06 162.899   8
   1   1  -4 1647.02 163.808   1
   1   1  -4 1725.29 162.911   4
  -1  -1  -4 1692.81 164.003   6
   1  -1  -4 1778.48 163.180   5
   1  -1  -4 1652.19 163.787   8
  -1  -1  -4 1659.51 162.242   4
  -1   1  -4 1803.50 162.239   4
  -1   1  -4 1873.98 163.634   6
  -1  -1  -4 1685.65 162.301   4
   1   1  -4 1865.45 163.685   6
   1   1  -4 1988.93 163.652   6
   1  -1  -4 1695.46 163.310   7
  -1  -1  -4 1707.19 162.748   5
   1  -1  -4 1739.39 163.003   4
  -1  -1  -4 1669.21 163.515   8
   1   1  -4 1774.64 163.219   8
   1   1  -3 590.026 57.1548   6
   1  -1  -3 540.651 57.4714   6
   1   1  -3 970.393 58.5828   1
   1   1  -3 717.172 58.0216   3
   1   1  -3 628.570 56.9366   4
  -1   1  -3 524.184 57.2522   7
  -1  -1  -3 527.088 57.3012   8
   1   1  -3 975.152 58.5344   1
   1   1  -3 571.512 57.5056   7
   1   1  -3 523.687 56.7749   8
   1  -1  -3 636.158 57.5684   3
   1  -1  -3 897.793 58.1217   2
  -1  -1  -3 872.088 58.4034   2
  -1  -1  -3 555.190 56.1783   4
   1  -1  -3 503.341 56.9020   7
  -1   1  -3 491.746 56.9994   6
  -1   1  -3 578.478 56.1102   4
   1   1  -3 921.960 58.1174   2
   1   1  -3 597.748 57.6899   5
   1  -1  -3 538.273 57.3477   8
  -1   1  -3 539.840 57.1565   5
  -1   1  -3 835.753 58.2502   2
  -1  -1  -3 515.393 56.0999   4
   1  -1  -3 1009.55 59.2054   1
   1  -1  -3 574.791 56.9580   5
  -1  -1  -3 539.109 56.8971   7
  -1  -1  -3 525.791 57.6465   6
  -1   1  -3 531.257 56.4928   8
  -1  -1  -3 544.605 56.5029   5
   1  -1  -3 545.577 56.8397   4
   1   1  -3 560.063 57.0228   6
   1   1  -2 64408.1 5984.97   8
  -1   1  -2 65232.3 5984.54   4
   1  -1  -2 62750.5 5985.17   4
   1   1  -2 64705.2 5985.36   3
   1  -1  -2 63604.5 5985.20   3
  -1  -1  -2 61004.4 5985.47   1
  -1   1  -2 65776.6 5985.24   5
  -1  -1  -2 63931.7 5984.54   4
   1  -1  -2 64207.0 5985.13   2
  -1   1  -2 66347.7 5984.74   8
   1  -1  -2 66898.0 5985.42   8
   1  -1  -2 63242.7 5985.42   1
   1   1  -2 63645.5 5985.29   2
   1   1  -2 64030.0 5985.21   1
   1  -1  -2 66537.3 5985.39   6
   1   1  -2 68644.1 5985.50   5
  -1  -1  -2 64619.5 5984.70   5
   1   1  -2 62953.7 5985.22   1
   1   1  -2 63751.5 5985.06   4
  -1  -1  -2 65705.5 5984.98   7
   1  -1  -2 67847.0 5985.08   5
   1   1  -2 66615.4 5984.98   6
  -1   1  -2 65968.7 5985.11   6
   1  -1  -2 65764.8 5985.01   7
   1   1  -2 61550.8 5985.36   7
  -1  -1  -2 67495.4 5985.30   8
   1   1  -2 63423.9 5985.13   2
  -1   1  -2 60655.5 5985.38   3
   1  -1  -1 736.328 86.0624   5
  -1  -1  -1 695.480 85.9295   7
   1   1  -1 1311.44 86.3311   1
   1  -1  -1 986.529 86.1276   3
  -1  -1  -1 1426.84 86.8720   1
  -1   1  -1 744.668 86.0467   6
   1   1  -1 736.123 85.9666   8
   1   1  -1 1139.23 86.3754   2
  -1   1  -1 1078.43 86.4775   3
   1  -1  -1 1266.92 86.3164   2
   1  -1   1 724.012 76.0442   5
  -1  -1   1 851.135 76.2366   3
   1  -1   1 738.156 75.8794   6
  -1  -1   1 811.685 76.1285   4
   1   1   1 706.794 76.0604   8
  -1   1   2 61332.8 5866.18   5
   1  -1   2 64208.5 5865.96   8
   1   1   2 65247.4 5865.96   5
  -1   1   2 62702.4 5866.37   2
   1   1   2 64252.8 5866.24   7
  -1   1   2 63301.5 5866.47   3
  -1  -1   2 61732.8 5866.53   3
   1  -1   2 66575.1 5866.32   6
  -1  -1   2 64932.5 5866.19   6
  -1  -1   2 65632.4 5866.73   5
   1  -1   2 63040.3 5866.58   7
  -1   1   2 65658.2 5866.61   6
  -1   1   2 62761.9 5866.21   7
  -1  -1   2 64009.1 5866.66   7
   1   1   2 65100.5 5866.47   8
   1   1   2 69002.3 5866.74   6
   1  -1   2 64338.2 5866.51   5
  -1   1   2 60833.6 5866.61   1
   1   1   2 64422.5 5865.77   4
  -1  -1   2 61438.4 5866.31   4
  -1   1   2 62842.1 5866.52   8
   1   1   2 60673.2 5866.63   2
   1   1   2 57699.8 5866.60   3
  -1  -1   2 60249.2 5866.12   8
   1  -1   3 509.371 57.7797   8
  -1   1   3 654.613 58.5753   4
   1  -1   3 578.171 58.7471   5
   1   1   3 559.701 57.9968   5
   1   1   3 523.021 58.2453   7
   1   1   3 538.335 58.5283   8
  -1   1   3 958.202 59.6043   2
  -1  -1   3 533.186 57.9792   8
  -1  -1   3 556.316 58.1287   4
  -1  -1   3 751.774 59.2963   3
   1  -1   3 957.590 59.9129   2
   1   1   3 536.027 58.8562   6
   1   1   3 726.743 59.7582   3
   1   1   3 953.096 60.2220   2
  -1   1   3 687.597 59.1709   3
  -1   1   3 553.380 58.8521   6
  -1  -1   3 571.949 59.0669   5
   1  -1   3 561.608 58.9296   7
  -1  -1   3 561.366 58.9127   7
   1  -1   3 532.719 57.3291   4
  -1   1   3 576.944 58.2588   5
  -1  -1   3 906.174 59.3130   2
   1  -1   3 601.833 58.5378   6
  -1   1   3 517.785 58.1803   7
  -1   1   3 970.001 60.2843   1
  -1  -1   4 1668.90 152.825   7
   1  -1   4 1792.81 153.028   7
  -1   1   4 1575.61 152.142   7
   1   1   4 1521.12 152.744   2
  -1   1   4 1454.50 152.592   3
   1   1   4 1604.19 153.232   3
  -1  -1   4 1586.19 151.795   4
  -1  -1   4 1769.38 153.013   5
  -1   1   4 1644.57 151.984   5
   1  -1   4 1709.02 151.123   4
   1   1   4 1646.47 151.923   5
   1   1   4 1533.39 152.121   7
  -1   1   4 1536.02 152.904   1
   1  -1   4 1711.22 151.715   8
   1  -1   4 1939.83 152.979   5
  -1  -1   4 1522.71 152.593   3
  -1   1   4 1513.29 152.444   2
   1  -1   4 1698.55 152.853   2
  -1  -1   4 1410.15 152.123   2
  -1   1   4 1616.48 152.071   4
  -1  -1   5 502.592 50.0033   3
   1   1   5 359.332 48.7703   7
  -1   1   5 703.268 51.7828   1
  -1  -1   5 434.296 47.7426   4
  -1   1   5 550.059 50.4792   3
   1  -1   5 391.226 50.1064   7
  -1   1   5 439.712 48.2800   5
   1   1   5 555.763 51.1705   3
   1  -1   5 425.534 49.6191   5
   1  -1   5 520.165 50.6270   3
   1   1   5 431.180 48.5000   5
  -1  -1   5 407.747 49.6433   7
  -1  -1   5 621.828 50.0129   2
  -1   1   5 416.769 48.7220   7
   1   1   5 664.960 52.0709   1
  -1  -1   5 464.861 50.0449   5
  -1   1   5 665.392 50.2664   2
   1  -1   5 651.034 50.7678   2
   1   1   5 673.385 51.2516   2
   1  -1   5 389.058 46.5967   4
  -1   1   6 296.403 30.7306   7
   1  -1   6 268.675 32.0504   3
   1  -1   6 270.255 30.8954   2
  -1  -1   6 260.149 30.0089   2
   1  -1   6 256.279 27.4149   4
  -1   1   6 265.618 31.5919   1
   1   1   6 289.587 31.4831   2
  -1   1   6 306.717 32.0843   3
   1   1   6 266.825 32.1346   3
   1   1   6 292.687 30.6623   7
  -1  -1   6 262.649 31.0518   5
  -1   1   6 284.196 29.9639   5
   1   1   6 324.072 29.9985   5
  -1  -1   6 245.036 30.8085   3
  -1  -1   6 244.315 28.5292   4
  -1   1   6 256.382 30.6106   2
  -1  -1   6 230.871 30.9424   7
   1   1   6 272.999 32.0770   1
   1  -1   6 289.199 30.7174   5
   1  -1   6 278.722 31.2486   7
  -1   1   7 41.6913 15.4627   5
   1  -1   7 74.4034 19.0845   3
   1  -1   7 29.9036 17.2436   5
  -1  -1   7 84.7192 20.1606   3
  -1   1   7 35.5742 16.4517   7
  -1  -1   7 77.5120 18.5341   5
   1  -1   7 98.2898 18.2953   2
   1   1   7 60.2570 19.4932   3
  -1   1   7 59.5265 18.2073   3
   1   1   7 106.626 20.6198   1
  -1   1   7 88.2835 18.0793   2
   1  -1   7 58.0232 18.7368   7
  -1  -1   7 44.8727 18.4417   7
   1   1   7 50.9514 15.5117   5
   1   1   7 33.4584 16.8924   7
  -1   1   7 96.7006 19.5700   1
  -1  -1   7 93.9108 17.4996   2
   1   1   7 74.3628 18.2929   2
  -1  -1   7 55.1322 13.0268   4
   1  -1   7 67.3641 11.4680   4
  -1  -1   8 113.053 17.7401   4
   1  -1   8 120.192 24.3843   7
   1  -1   8 118.782 22.7518   5
  -1   1   8 103.720 23.4545   7
  -1  -1   8 108.003 24.3200   7
   1   1   8 109.210 20.3389   5
  -1   1   8 94.8183 21.7212   2
   1   1   8 86.2576 24.9391   3
  -1  -1   8 135.592 24.2773   3
  -1  -1   8 133.847 23.8269   5
  -1   1   8 120.516 24.7452   3
   1   1   8 104.279 23.7326   2
   1  -1   8 100.115 24.4750   3
  -1  -1   8 86.1063 21.3739   2
   1  -1   8 118.920 22.5831   2
  -1   1   8 169.622 26.2927   1
  -1   1   8 116.395 20.3018   5
   1   1   8 157.372 23.6114   7
   1   1   9 123.435 28.4714   7
  -1   1   9 202.731 30.1151   2
  -1  -1   9 102.035 29.0180   5
   1   1   9 172.314 29.2617   2
  -1   1   9 124.116 31.5386   3
   1   1   9 164.418 28.0360   5
  -1  -1   9 118.506 31.3944   7
   1  -1   9 223.608 32.1388   2
   1  -1   9 139.402 30.1760   5
   1  -1   9 145.573 31.1367   7
  -1   1   9 99.5006 26.5084   5
  -1  -1   9 162.027 31.3748   3
   1   1   9 124.142 32.1342   3
  -1   1   9 100.023 28.8417   7
   1  -1   9 161.424 33.1378   3
   1  -1  10 86.7262 27.6510   5
  -1  -1  10 54.8406 29.2870   7
   1  -1  10 150.298 33.2514   3
   1   1  10 78.1330 29.3156   2
  -1   1  10 40.9968 26.6604   2
   1   1  10 70.8429 28.2719   7
  -1   1  10 103.913 31.2534   3
  -1   1  10 63.4859 24.5329   5
   1   1  10 89.8053 25.8756   5
  -1  -1  10 60.5854 30.0386   3
   1  -1  10 79.8971 29.5651   7
  -1   1  10 100.546 29.8040   7
   1   1  10 130.624 33.2407   3
  -1  -1  10 103.684 28.7085   5
  -1   1  11-25.3167 25.8908   2
   1   1  11 17.3743 25.9020   7
   1  -1  11-35.3124 30.3643   3
   1  -1  11 7.06811 23.9863   5
   1  -1  11-2.69201 26.7611   7
  -1  -1  11 61.9901 26.9716   3
  -1   1  11 28.1959 26.3466   3
   1   1  11 8.06306 24.9773   2
  -1   1  11 7.30911 25.2012   7
  -1  -1  11 7.05098 23.5940   5
   1   1  11 35.3499 29.6346   3
  -1  -1  11 15.9830 26.9271   7
  -1  -1  12-2.92654 29.7746   7
   1   1  12-5.94521 27.9890   2
   1  -1  12-6.49598 30.0819   3
   1   1  12-8.24958 27.2555   7
   1  -1  12 20.8248 29.1248   7
  -1   1  12-18.6787 31.4520   3
  -1  -1  12 18.6778 29.7821   3
  -1   1  12 16.1259 27.5963   7
   1   1  12-35.6682 33.8192   3
  -1   1  13-55.8171 33.0423   7
   1   1  13 27.1766 31.4935   7
  -1  -1  13-25.4582 33.8414   7
  -1   1  13 23.7878 33.6813   3
   1  -1  13 9.78245 32.3190   7
   1  -1  13-21.2672 33.5533   3
   1   1  13 3.54136 34.6689   3
  -1  -1  13 64.8597 32.9137   3
   1   1  14-30.4176 34.2167   3
  -1   1  14 51.4741 34.5247   3
  -1  -1  14-11.1393 35.8932   3
   1  -1  14 84.1683 35.1809   7
   1  -1  14 3.80951 36.5408   3
  -1  -1  14-65.4253 37.3868   7
   1  -1  15 45.0368 37.6438   3
  -1  -1  15 19.9472 36.0532   3
  -1   1  15-3.95371 38.3597   3
  -1  -2 -15 34.7738 33.5446   6
  -1  -2 -15 15.7800 35.2006   2
  -2   1 -15-28.2489 37.3176   1
   1   2 -15 65.9716 38.4046   1
   2  -1 -15 14.3767 30.4902   2
   1   2 -15-23.5235 32.9220   2
  -2   1 -15 24.9321 36.4002   2
  -1  -2 -15 4.52673 38.1361   1
   2  -1 -15 4.22415 38.0280   1
  -1  -2 -14-36.5380 31.8939   2
  -1  -2 -14-21.0061 37.4707   1
  -2   1 -14 43.0245 35.2405   1
   2  -1 -14 15.6829 30.0081   6
   2  -1 -14 3.37123 31.1360   2
  -1  -2 -14-9.82525 32.2227   6
   2  -1 -14 3.90983 33.0380   1
   1   2 -14 44.3809 34.2067   1
   1   2 -14-36.8765 33.8664   2
  -2   1 -14 31.4677 33.6809   2
  -1  -2 -13-11.5457 33.0657   1
   1   2 -13-62.4360 35.4157   1
  -2   1 -13 29.9751 28.3637   6
  -2   1 -13-25.8220 31.7966   2
  -2   1 -13-11.7065 35.0164   1
   2  -1 -13 35.4022 31.2451   6
  -1  -2 -13 67.2236 31.2358   6
   1   2 -13 13.6641 30.6551   2
   2  -1 -13 3.11073 28.3286   2
   2  -1 -13 35.8866 30.7330   1
  -1  -2 -12-28.1356 27.8620   6
   2  -1 -12-27.0738 22.8473   8
   2  -1 -12 13.7080 27.0187   6
   1   2 -12-2.35222 23.3660   6
   2  -1 -12-49.1087 30.8650   1
  -2   1 -12-31.6064 32.7433   1
  -2   1 -12 22.4042 25.6653   6
  -1  -2 -12-24.0280 24.1023   8
   1   2 -12-13.2679 29.7139   1
  -2   1 -12 3.40294 30.1154   2
  -1  -2 -12-45.5655 31.0166   1
   1   2 -12-22.3078 29.8022   2
  -1  -2 -11-9.51592 27.3377   1
   2  -1 -11-2.14907 21.5593   8
  -2   1 -11 4.50971 23.7757   6
   1   2 -11 41.1719 28.3556   2
   2  -1 -11 2.53274 25.8278   6
   2  -1 -11-2.96884 27.4966   1
  -2   1 -11 3.10247 29.2118   2
  -1  -2 -11-20.4012 22.4640   8
  -1  -2 -11-12.8975 26.2440   6
  -2   1 -11 40.6582 28.6410   1
   1   2 -11-14.7921 27.6287   1
   1   2 -11 21.2377 23.0123   6
   1   2 -10 228.879 36.8803   2
  -2   1 -10 147.219 31.0388   6
   2  -1 -10 150.432 30.4948   8
   1   2 -10 144.965 29.8354   6
  -1  -2 -10 227.689 37.2706   1
   2  -1 -10 151.230 25.4174   4
  -2   1 -10 92.5683 25.6918   8
   2  -1 -10 186.658 35.1943   1
   1   2 -10 209.920 35.9777   1
   1   2 -10 142.365 25.3394   8
  -1  -2 -10 114.973 33.1455   6
  -2   1 -10 169.083 35.1437   1
   2  -1 -10 129.806 33.2022   6
  -1  -2 -10 102.348 27.9536   8
   1   2  -9 84.9946 22.0645   8
   1   2  -9 71.3002 28.5930   1
  -2   1  -9 152.859 26.7971   6
  -1  -2  -9 102.636 26.3714   8
   2  -1  -9 85.5670 21.0444   4
  -2   1  -9 88.4240 21.1021   8
  -1  -2  -9 141.378 29.9203   6
   1   2  -9 106.685 29.1416   2
   1   2  -9 89.5783 23.9054   6
   2  -1  -9 91.8223 28.0704   6
  -2   1  -9 160.540 30.9356   1
  -1  -2  -9 126.448 17.4129   4
   2  -1  -9 92.3153 26.1060   8
   1   2  -8 46.4064 16.3752   8
  -1  -2  -8 42.3816 11.3353   4
   2  -1  -8 42.4971 21.7819   6
  -2   1  -8 33.1523 18.1253   6
  -2   1  -8 33.2989 9.43294   4
   1   2  -8 103.918 22.9160   2
  -2   1  -8 52.5600 21.8064   1
   1   2  -8 78.3943 17.9166   6
  -2   1  -8 37.4436 15.6146   8
   1   2  -8 85.1871 21.4033   1
   2  -1  -8 53.9139 15.0074   4
  -1  -2  -8 14.1376 17.6426   8
  -1  -2  -8 45.1753 21.5926   6
   2  -1  -8 60.5716 19.2543   8
   2  -1  -7 771.272 78.5943   6
   1   2  -7 702.666 77.9570   1
   1   2  -7 780.333 75.9791   8
   1   2  -7 790.279 76.9404   6
  -2   1  -7 773.306 73.9025   4
   1   2  -7 799.759 79.5591   2
  -1  -2  -7 858.570 79.0058   6
  -2   1  -7 796.561 79.2969   1
  -2   1  -7 797.544 75.8929   8
  -2   1  -7 838.660 77.5788   6
  -1  -2  -7 831.264 77.6874   8
   2  -1  -7 799.972 77.7220   8
   2  -1  -7 781.088 76.1528   4
  -2   1  -7 760.167 74.0143   4
  -1  -2  -7 763.695 74.5640   4
   2  -1  -6 147.947 23.4247   6
  -2   1  -6 179.453 18.4455   4
   1   2  -6 158.314 20.9492   8
  -1  -2  -6 175.218 24.2031   6
   1   2  -6 189.482 22.1304   6
  -1  -2  -6 155.875 23.1290   8
  -1  -2  -6 162.516 19.3189   4
   1   2  -6 301.522 25.9597   1
  -1  -2  -6 180.355 19.4845   4
   1   2  -6 292.046 26.8725   2
  -2   1  -6 184.509 21.2249   8
  -2   1  -6 155.044 22.2740   6
   2  -1  -6 150.954 23.4460   8
   1   2  -5 2740.67 256.959   8
  -1  -2  -5 2802.70 258.511   6
  -1  -2  -5 2627.79 256.203   4
   1   2  -5 2729.42 258.184   1
  -2   1  -5 2863.06 257.812   6
   2  -1  -5 2763.86 258.141   8
  -2   1  -5 2701.31 255.661   4
   1   2  -5 2857.83 258.645   2
  -2   1  -5 2917.51 256.842   8
  -1  -2  -5 2746.62 256.489   5
   1   2  -5 2923.22 257.045   8
   1   2  -5 2810.71 257.441   6
  -1  -2  -5 2676.17 257.933   8
  -1  -2  -5 2687.14 256.124   4
  -2   1  -4 1073.56 105.185   8
  -1  -2  -4 1080.04 104.928   5
   2  -1  -4 1114.38 105.876   4
  -2   1  -4 1109.86 104.232   4
   1   2  -4 1065.89 105.367   8
  -2   1  -4 1059.86 106.172   6
   2  -1  -4 1644.98 106.923   2
   1   2  -4 1813.20 107.989   1
  -1  -2  -4 1106.51 104.835   4
   1   2  -4 1068.76 105.559   6
  -1  -2  -4 1103.42 106.505   8
  -1  -2  -4 1020.90 106.816   6
  -1  -2  -4 1034.54 104.828   4
   1   2  -4 1091.24 105.698   6
   2  -1  -4 999.072 105.908   7
   1   2  -4 1606.28 107.942   2
  -1  -2  -4 1029.05 105.430   7
   1   2  -4 1077.44 105.554   4
   2  -1  -4 1072.83 106.067   5
  -2   1  -3 23333.2 2143.04   8
   2  -1  -3 24485.1 2143.76   6
   1   2  -3 24792.2 2143.24   6
   1   2  -3 23617.5 2143.04   8
   2  -1  -3 23498.6 2143.91   1
   1   2  -3 23314.3 2143.69   2
   1   2  -3 24558.3 2144.00   5
   2  -1  -3 22735.3 2143.38   2
   2  -1  -3 24634.1 2143.70   5
   1   2  -3 22963.4 2143.18   6
  -1  -2  -3 23332.9 2143.89   8
   2  -1  -3 22318.2 2143.51   3
   2  -1  -3 23930.6 2143.98   8
  -1  -2  -3 23299.8 2142.72   5
   2  -1  -3 23713.0 2143.43   7
  -1  -2  -3 22757.1 2142.79   4
   1   2  -3 22487.5 2143.62   1
  -2   1  -3 22724.1 2143.63   7
   1   2  -3 22929.0 2143.90   7
   2  -1  -3 22735.5 2143.57   4
  -1  -2  -3 22989.3 2143.08   7
  -1  -2  -3 22351.1 2143.85   2
  -2   1  -3 21991.7 2143.84   3
  -2   1  -3 22854.7 2143.58   6
  -2   1  -3 23141.9 2143.39   5
  -1  -2  -3 22103.4 2143.72   3
   1   2  -3 23022.3 2143.31   4
   1   2  -3 22948.1 2143.72   1
   1   2  -3 22644.3 2143.95   2
   1   2  -3 23098.1 2143.96   3
   2  -1  -2 1778.84 196.149   7
  -2   1  -2 3200.52 197.626   1
  -2   1  -2 1863.03 196.267   5
   2  -1  -2 3400.84 197.425   1
  -1  -2  -2 1889.39 195.982   7
   2  -1  -2 1902.16 196.771   8
   1   2  -2 1750.32 195.825   8
   1   2  -2 3187.17 197.194   1
  -1  -2  -2 1984.16 195.958   4
   2  -1  -2 2013.92 196.453   5
  -2   1  -2 1843.25 196.405   6
   2  -1  -2 2470.13 196.527   3
  -2   1  -2 2398.54 196.984   3
   2  -1  -2 3225.51 196.705   2
  -1  -2  -2 3571.87 198.033   1
   1   2  -2 1769.05 195.856   6
   1   2  -2 1977.24 196.432   4
  -2   1  -2 3155.19 197.542   2
   2  -1  -2 1818.18 196.444   6
   1   2  -2 1694.97 195.864   6
  -2   1  -2 1853.67 195.937   8
   2  -1  -2 2158.30 196.735   4
   1   2  -2 2774.67 197.209   2
  -2   1  -1 83460.6 8144.84   6
  -1  -2  -1 86537.4 8144.97   6
   2  -1  -1 88020.8 8144.82   5
  -2   1  -1 88205.5 8144.62   8
   1   2  -1 87996.6 8144.79   2
  -1  -2  -1 88487.4 8144.63   4
  -1  -2  -1 88854.6 8144.43   7
   1   2  -1 88207.7 8144.73   1
   2  -1  -1 88722.5 8144.65   1
  -1  -2  -1 92434.4 8144.94   1
  -2   1  -1 89960.3 8144.81   3
  -2   1  -1 87853.3 8144.88   2
   1   2  -1 86837.2 8144.95   7
  -2   1  -1 90292.9 8145.02   1
   1   2  -1 84762.8 8145.04   5
   2  -1   0 23.3843 2.82332   1
  -1  -2   0 12.2728 2.89701   8
  -1  -2   0 11.4506 3.04244   5
   2  -1   0 10.7118 2.74465   8
   2  -1   0 19.0820 3.02226   4
   2  -1   0 14.7303 3.07904   7
   1   2   0 12.4457 3.06884   8
   1   2   0 18.1582 3.29215   4
  -2   1   0 14.3805 3.01828   7
  -1  -2   0 20.2405 2.72965   2
  -2   1   0 23.7166 2.96844   1
   1   2   0 22.4831 2.73257   1
   2  -1   1 89768.1 8269.46   6
   2  -1   1 90462.1 8269.41   5
   1   2   1 87279.2 8269.49   3
  -1  -2   1 88686.7 8269.48   2
  -2   1   1 88495.3 8269.38   1
   1   2   1 89435.8 8269.25   4
   2  -1   1 91229.7 8269.47   3
   1   2   1 83744.9 8269.58   1
   2  -1   1 89618.0 8269.21   8
  -1  -2   1 90725.6 8269.34   1
  -2   1   1 88827.7 8269.51   5
  -2   1   1 90999.7 8269.50   6
  -1  -2   1 91363.3 8269.59   4
   1   2   1 90411.7 8269.06   7
  -2   1   2 3307.01 198.142   1
  -1  -2   2 2662.73 197.671   2
   2  -1   2 1882.92 197.020   6
  -1  -2   2 2004.47 197.132   4
   2  -1   2 1848.59 197.251   7
  -2   1   2 1924.14 197.256   6
   1   2   2 1905.37 196.539   4
  -2   1   2 2170.65 197.198   5
  -2   1   2 2157.59 197.606   4
   1   2   2 1958.33 197.348   8
  -1  -2   2 3195.11 197.716   1
   1   2   2 1817.95 196.633   7
   2  -1   2 1802.11 196.595   8
  -2   1   2 1830.12 197.363   8
   2  -1   2 1817.32 197.046   5
  -1  -2   2 1860.53 197.542   5
   1   2   2 2382.24 197.638   3
  -2   1   2 1981.01 196.986   7
  -2   1   2 2490.73 197.210   3
  -2   1   2 3231.53 197.390   2
  -1  -2   2 1773.73 196.513   8
   2  -1   2 2406.91 197.695   3
   1   2   2 3098.36 198.264   2
  -1  -2   3 22771.5 2115.80   3
   2  -1   3 23033.3 2114.98   8
  -1  -2   3 22430.0 2114.80   8
  -2   1   3 23695.7 2115.77   4
   1   2   3 22196.7 2115.87   2
  -1  -2   3 23725.8 2116.12   5
  -2   1   3 22745.9 2115.33   2
   1   2   3 23215.1 2114.73   5
  -1  -2   3 23816.9 2116.05   7
  -2   1   3 24424.6 2115.46   7
   1   2   3 22451.6 2115.91   3
   2  -1   3 22704.6 2115.51   5
  -1  -2   3 23094.9 2115.32   4
  -2   1   3 22225.0 2115.67   8
  -2   1   3 23767.4 2115.41   5
   1   2   3 22181.0 2114.73   4
   1   2   3 22445.0 2115.68   8
  -2   1   3 23727.0 2115.81   6
  -2   1   3 21825.9 2115.44   3
  -2   1   3 22290.9 2115.78   1
   2  -1   3 22612.1 2115.73   7
   2  -1   3 23106.3 2115.47   6
   1   2   3 22467.4 2115.12   7
   2  -1   4 1160.30 114.234   5
  -2   1   4 1172.76 114.194   4
  -2   1   4 998.311 113.952   7
  -2   1   4 972.832 113.972   8
  -1  -2   4 1108.61 113.554   4
   2  -1   4 1095.34 114.556   7
   1   2   4 1379.09 115.540   3
  -1  -2   4 1203.15 115.089   5
  -2   1   4 1743.74 115.042   2
   2  -1   4 1778.83 116.099   2
  -2   1   4 996.600 114.348   6
  -2   1   4 1332.56 114.803   3
   1   2   4 1729.78 116.244   2
   2  -1   4 1036.65 113.215   8
   1   2   4 1152.10 113.247   5
  -2   1   4 1011.10 113.859   5
  -2   1   4 1843.22 116.226   1
  -1  -2   4 1431.16 115.292   3
  -1  -2   4 1155.51 115.032   7
   1   2   4 1098.11 113.670   7
  -1  -2   5 2531.39 247.904   3
   2  -1   5 2705.66 248.110   7
   1   2   5 2633.82 248.459   3
   2  -1   5 2995.96 247.878   5
  -1  -2   5 2910.20 248.579   5
   2  -1   5 2599.87 248.046   2
  -2   1   5 2541.07 247.739   3
  -2   1   5 2519.60 248.044   1
  -2   1   5 2789.79 247.559   7
  -2   1   5 2539.53 247.113   5
  -1  -2   5 2540.09 246.769   4
   2  -1   5 2595.88 246.705   8
   1   2   5 2638.13 246.651   5
   1   2   5 2689.62 247.261   7
  -2   1   5 2563.92 247.392   2
  -2   1   5 2610.68 247.882   6
   1   2   5 2772.35 248.446   2
   1   2   5 2428.83 248.193   1
  -2   1   5 2666.19 247.397   4
  -1  -2   5 2793.96 248.455   7
   2  -1   6 205.212 25.5765   5
  -2   1   6 170.490 24.1262   5
  -1  -2   6 177.305 23.3695   4
  -1  -2   6 214.816 26.7142   3
   1   2   6 150.697 24.5314   7
   2  -1   6 201.584 26.9734   7
  -2   1   6 191.531 26.5518   3
  -2   1   6 182.850 25.1940   7
   1   2   6 294.607 27.8707   2
   1   2   6 205.536 27.4224   3
  -2   1   6 280.999 27.3107   1
   1   2   6 162.724 23.7680   5
   1   2   6 349.791 30.0287   1
   2  -1   6 300.508 27.8961   2
  -1  -2   6 194.971 27.0167   7
  -2   1   6 240.326 25.8468   2
  -1  -2   6 185.855 26.7805   5
  -1  -2   7 720.640 75.5662   4
  -1  -2   7 760.549 78.5327   5
  -2   1   7 848.534 78.7254   3
   1   2   7 774.990 79.4900   3
   1   2   7 870.676 77.8141   7
  -2   1   7 769.892 77.6170   7
   1   2   7 785.665 78.4889   2
  -1  -2   7 829.253 78.9465   7
  -2   1   7 725.176 77.1260   2
  -2   1   7 774.481 78.1722   1
   2  -1   7 673.353 78.8214   3
  -1  -2   7 809.577 78.4909   3
   1   2   7 723.653 78.5826   1
   1   2   7 846.950 76.6228   5
  -2   1   7 757.197 76.6637   5
   2  -1   7 823.056 78.5058   7
   2  -1   7 770.715 78.3384   2
   2  -1   7 835.208 78.3368   5
  -1  -2   8 43.3804 14.3571   4
   2  -1   8 107.956 22.9991   2
  -2   1   8 16.6501 18.4342   7
   1   2   8 23.4115 23.0846   3
  -2   1   8 71.6129 19.8535   2
   2  -1   8 57.1723 21.7713   7
   1   2   8 39.7663 17.2806   5
  -1  -2   8 33.2554 21.6081   7
   2  -1   8 40.8181 20.4604   5
   2  -1   8 78.0705 22.9420   3
   1   2   8 59.4645 19.7824   7
   1   2   8 65.2461 20.7719   2
  -1  -2   8 52.1030 21.4567   3
  -2   1   8 45.3580 17.1693   5
   1   2   8 96.8049 23.9316   1
  -2   1   8 41.7149 20.2281   3
  -1  -2   8 66.6400 21.3087   5
  -2   1   8 94.4447 22.6831   1
   1   2   9 95.0641 22.1758   5
   2  -1   9 93.1791 30.6638   3
  -2   1   9 111.256 26.4274   2
   1   2   9 91.4583 26.3533   7
   1   2   9 165.465 29.3782   2
  -2   1   9 73.9694 22.9011   5
  -2   1   9 97.8942 27.4922   3
   2  -1   9 140.413 28.9898   7
  -1  -2   9 77.2491 19.9152   4
  -1  -2   9 126.716 29.2205   5
   1   2   9 125.167 33.5027   3
  -1  -2   9 146.641 28.4727   3
  -1  -2   9 91.1004 30.1685   7
  -2   1   9 43.8730 25.6659   7
   2  -1   9 121.120 27.6301   5
   2  -1   9 92.4653 29.0515   2
   2  -1  10 193.311 35.8725   3
  -2   1  10 105.659 31.4138   7
   1   2  10 258.487 39.5007   3
  -2   1  10 269.178 33.7615   2
   2  -1  10 102.626 32.6548   5
   1   2  10 154.020 28.7983   5
  -2   1  10 177.446 35.3317   3
  -1  -2  10 146.221 34.0340   5
  -2   1  10 184.194 31.0232   5
  -1  -2  10 99.5229 34.8022   7
  -1  -2  10 278.311 37.6690   3
   1   2  10 234.941 35.9635   2
   2  -1  10 144.466 33.9847   7
   1   2  10 126.879 31.7121   7
  -1  -2  11 19.4154 28.6836   7
   1   2  11 2.73405 25.9632   2
   2  -1  11-29.9108 27.4191   7
  -2   1  11 2.40974 26.2293   7
   1   2  11 33.2614 24.4630   7
   2  -1  11-18.8891 25.5966   5
  -1  -2  11-14.1152 29.9051   3
   1   2  11-5.94031 29.0158   3
  -2   1  11 33.0473 28.6710   3
   2  -1  11 56.7834 28.5286   3
  -1  -2  11-10.0654 26.5448   5
  -2   1  11 28.3383 22.2586   5
  -2   1  11 27.0407 24.2593   2
  -1  -2  12 40.6710 30.5557   3
   1   2  12 11.9657 28.5490   2
  -2   1  12 13.3431 28.8613   7
   2  -1  12-16.4590 31.8251   3
  -1  -2  12-51.7234 33.0385   7
  -1  -2  12 2.70236 26.5270   5
   1   2  12 5.27057 25.4801   7
   1   2  12-19.4872 30.2527   3
  -2   1  12-24.3208 28.9369   3
   2  -1  12-15.0195 29.4858   7
  -1  -2  13-17.1892 33.9938   3
   1   2  13-6.51487 29.5770   2
  -1  -2  13 66.0952 34.2423   7
  -2   1  13-6.64671 33.5790   3
   2  -1  13-9.85300 32.0759   7
   1   2  13 10.6182 33.5082   3
   2  -1  13 10.7553 33.7589   3
  -1  -2  14-26.1192 35.8968   3
  -2   1  14 43.3004 35.6022   3
   2  -1  14-53.4445 36.3457   7
  -1  -2  14 49.9905 36.3411   7
   2  -1  14 61.9391 34.6442   3
   1   2  14 7.62329 36.5740   3
   1   2  15-61.1368 37.9684   3
  -2   1  15-19.4315 36.3140   3
   2  -1  15-8.30759 37.8264   3
   2   0 -15-3.62075 33.1694   2
   0  -2 -15-6.91696 33.0128   6
   0   2 -15 13.5351 36.4334   1
   0   2 -15 56.5565 35.6049   2
  -2   0 -15 4.66249 37.5118   1
  -2   0 -15-37.1316 39.2739   2
   0  -2 -15-49.6426 34.6801   2
   2   0 -15-42.2124 37.5461   1
   0  -2 -15 4.43406 37.8534   1
   2   0 -14-30.7205 30.6390   2
   0   2 -14-15.1734 32.9141   2
   2   0 -14-58.3001 35.0908   1
   0  -2 -14 28.2695 31.1468   2
   0   2 -14-4.13218 35.7378   1
   0  -2 -14 32.9693 36.9873   1
  -2   0 -14 52.2983 30.1297   6
   0  -2 -14 45.7579 33.4174   6
  -2   0 -14-4.28081 37.3766   1
  -2   0 -14 62.3410 34.8662   2
   2   0 -13-10.7255 32.3685   1
  -2   0 -13 46.8981 32.6614   2
   0   2 -13-11.3246 32.7472   1
   2   0 -13 22.3162 31.1374   2
  -2   0 -13-7.79306 34.1238   1
   0   2 -13 21.0659 32.7936   2
   2   0 -13 28.3068 28.8713   6
  -2   0 -13 2.84158 29.6424   6
   0  -2 -13-12.1787 31.1958   6
   0  -2 -13-15.1080 34.2950   1
   2   0 -12 32.2179 28.1065   2
   0   2 -12-13.0983 29.8268   2
   0  -2 -12-8.47482 28.3509   6
  -2   0 -12-5.20442 26.3034   6
   0  -2 -12-2.25339 24.3808   8
   0   2 -12-33.9637 29.7513   1
   2   0 -12 5.25146 27.2775   6
   0   2 -12 18.7625 24.2046   6
   0  -2 -12 44.8734 29.1794   1
  -2   0 -12 52.6389 33.9330   1
   2   0 -12 42.1629 29.1126   1
   0   2 -11 27.1916 27.9845   2
   2   0 -11 56.2607 22.4316   8
   0  -2 -11-12.9770 25.9768   6
   0   2 -11 12.1284 28.3190   1
   0   2 -11 29.7219 22.0969   6
   0  -2 -11 18.7593 29.9141   1
   0  -2 -11-2.12474 22.9315   8
  -2   0 -11-23.6556 25.3718   6
  -2   0 -11-32.4195 20.1531   8
   2   0 -11 21.2593 24.6836   2
   2   0 -11-24.1189 27.0793   6
  -2   0 -11-3.14469 30.7882   1
   2   0 -11 17.5414 25.9993   1
   0  -2 -10 11.8510 24.6562   8
   0  -2 -10 2.80901 30.2236   1
  -2   0 -10 6.37096 24.5123   6
   2   0 -10 20.5805 22.2195   8
   0   2 -10-1.41018 18.3235   8
   2   0 -10 54.8872 27.3004   1
   0   2 -10 38.2987 29.6786   2
   0  -2 -10 45.0072 26.9855   6
   0   2 -10 13.3711 26.8041   1
   0   2 -10 15.1377 23.1106   6
   2   0 -10 5.86546 17.9631   4
   2   0 -10 39.5358 24.1826   6
  -2   0 -10 17.1868 20.5757   8
  -2   0 -10-13.9116 28.8647   1
   0   2  -9 77.3216 27.7958   1
   0   2  -9 70.7567 28.1454   2
   0   2  -9 35.1574 22.7053   6
  -2   0  -9 74.8628 21.3305   8
  -2   0  -9 134.386 29.3281   1
   0  -2  -9 44.9672 25.2504   6
   2   0  -9 51.8250 19.1961   4
   2   0  -9 67.3257 25.5251   6
  -2   0  -9 47.2871 23.2557   6
   2   0  -9 106.135 28.5747   1
   0  -2  -9 57.2735 15.2299   4
   0  -2  -9 52.9706 23.2759   8
   0   2  -9 56.0450 19.0118   8
   2   0  -9 63.5050 24.0175   8
   0   2  -8 309.794 38.0149   6
   2   0  -8 347.884 40.9051   1
  -2   0  -8 321.052 33.0501   4
   2   0  -8 275.757 37.8160   8
  -2   0  -8 421.674 37.4135   8
   0   2  -8 294.109 40.1132   1
   0   2  -8 300.377 35.8316   8
  -2   0  -8 346.509 39.3083   6
   0  -2  -8 337.396 39.0138   8
  -2   0  -8 348.549 41.5481   1
   0   2  -8 383.704 42.4175   2
   0  -2  -8 334.509 34.7657   4
   0  -2  -8 363.803 40.8662   6
   2   0  -8 334.686 39.6176   6
   0   2  -7 40.7270 18.5533   2
   0   2  -7 31.5023 11.5538   8
   0   2  -7 77.5198 18.7013   1
  -2   0  -7 32.7982 7.63875   4
  -2   0  -7 50.8488 16.0591   6
   2   0  -7 41.6669 14.4951   8
   0  -2  -7 32.3069 15.4730   8
  -2   0  -7 46.1619 8.11765   4
   0  -2  -7 55.4006 10.6956   4
   2   0  -7 25.7902 15.7813   6
   0   2  -7 26.2628 13.8749   6
   0  -2  -7 62.1690 18.3705   6
  -2   0  -7 34.1523 13.7127   8
   0  -2  -6 685.929 67.5938   4
   0  -2  -6 743.338 70.7205   6
   0   2  -6 696.428 68.7356   6
   0   2  -6 738.886 68.1048   8
   0  -2  -6 731.083 69.9628   8
  -2   0  -6 707.520 66.4528   4
  -2   0  -6 736.291 68.8023   8
   0   2  -6 678.738 70.2299   1
  -2   0  -6 666.171 66.4178   4
   2   0  -6 786.084 70.3680   6
  -2   0  -6 690.709 69.5370   6
   2   0  -6 706.154 69.3361   8
   0  -2  -5 905.066 87.1384   5
  -2   0  -5 907.317 87.7787   8
   0   2  -5 881.374 87.1545   8
   0  -2  -5 901.046 87.0524   4
   0  -2  -5 1006.04 90.1128   6
   0  -2  -5 866.958 89.1000   8
   0  -2  -5 948.469 87.0318   4
   0   2  -5 880.840 87.2337   8
   0   2  -5 923.609 87.0193   4
  -2   0  -5 845.295 85.8548   4
  -2   0  -5 929.486 85.9193   4
  -2   0  -5 892.054 89.0035   6
   0   2  -5 932.985 88.1740   6
   0   2  -4 35496.1 3163.88   2
  -2   0  -4 31300.1 3161.53   4
   0   2  -4 35775.6 3162.86   6
   2   0  -4 33525.8 3162.99   2
   2   0  -4 35184.9 3162.96   4
   0  -2  -4 34767.9 3163.56   8
   0   2  -4 35628.0 3162.82   6
  -2   0  -4 35984.8 3162.81   8
   0   2  -4 33564.2 3162.32   4
   0  -2  -4 35770.3 3162.36   5
  -2   0  -4 34692.8 3162.60   5
  -2   0  -4 35371.7 3163.40   6
   0  -2  -4 34405.3 3162.43   4
   0   2  -4 36290.8 3162.43   8
  -2   0  -4 33337.6 3161.55   4
   0  -2  -4 32375.6 3162.37   4
   0  -2  -4 35201.6 3162.62   7
   0   2  -4 32967.6 3163.48   1
   0   2  -4 34334.8 3162.33   8
   0  -2  -4 36406.7 3163.96   6
   2   0  -4 35605.3 3163.25   8
   0  -2  -3 186.854 22.4681   7
   2   0  -3 346.245 23.8395   2
   2   0  -3 290.541 24.0867   3
   2   0  -3 384.154 25.0099   1
   0  -2  -3 214.647 22.6850   4
   0   2  -3 296.154 24.4043   1
  -2   0  -3 322.401 24.9091   1
   0  -2  -3 262.007 23.8145   3
  -2   0  -3 356.069 25.3105   1
   2   0  -3 232.926 23.8423   5
   0   2  -3 191.790 23.4688   5
   0  -2  -3 210.204 24.1107   8
  -2   0  -3 202.132 23.0321   8
   0  -2  -3 222.664 24.4599   6
   0   2  -3 202.433 22.2401   8
  -2   0  -3 252.690 24.0936   3
   0   2  -3 329.939 24.5880   2
   2   0  -3 205.446 23.5217   7
  -2   0  -3 212.645 23.2264   7
   0   2  -3 204.478 22.4715   4
   0   2  -3 273.862 24.7996   2
   2   0  -3 226.577 23.4218   4
   0   2  -3 183.194 22.2068   8
   0  -2  -3 214.149 22.3576   5
  -2   0  -3 206.980 22.6804   5
   2   0  -3 193.551 23.1837   6
   0  -2  -3 352.924 24.8710   2
   2   0  -3 190.913 23.4623   8
   0   2  -3 185.823 22.7711   6
  -2   0  -3 172.615 23.6662   6
   0   2  -2 77237.2 7298.99   4
   2   0  -2 78834.1 7299.28   1
  -2   0  -2 79785.8 7299.24   7
   2   0  -2 79751.6 7299.43   4
   2   0  -2 81265.6 7299.15   6
  -2   0  -2 76976.0 7299.57   1
  -2   0  -2 79415.7 7298.94   5
  -2   0  -2 80793.6 7299.53   3
   2   0  -2 79236.8 7299.40   8
   0  -2  -2 78479.8 7298.98   4
   0   2  -2 75298.2 7299.55   2
   0   2  -2 80884.3 7298.82   6
  -2   0  -2 74242.8 7299.47   2
   0  -2  -2 78518.1 7299.31   3
  -2   0  -2 78149.0 7299.38   6
   0  -2  -2 78577.7 7298.74   7
   2   0  -2 79048.1 7298.97   2
   0   2  -2 78149.8 7299.47   1
   2   0  -2 75905.3 7299.24   7
  -2   0  -2 79458.6 7299.56   1
  -2   0  -2 80803.9 7299.07   8
   0  -2  -2 79821.4 7299.43   2
   2   0  -2 79617.4 7299.22   3
   2   0  -2 83608.6 7299.52   5
   0  -2  -1 6.15202 2.70054   4
  -2   0  -1 3.01223 2.65588   8
   2   0  -1 13.4242 2.76766   1
  -2   0  -1 6.14626 2.37794   5
   0  -2  -1-0.51393 3.90851   3
   2   0  -1 4.87553 2.56982   3
   2   0  -1 10.5378 2.50432   3
   0   2  -1 9.54605 3.24829   4
  -2   0  -1 12.5517 3.32655   3
   2   0  -1 5.40291 2.77925   6
   0  -2  -1 0.34499 4.58953   6
  -2   0  -1 13.6180 3.36118   2
  -2   0  -1 12.6843 3.02017   1
   0   2  -1 9.63583 3.98888   3
   0   2  -1 12.2648 4.45596   7
   2   0   1 7.14935 2.69152   7
   0   2   1 9.93938 3.82123   2
  -2   0   1 15.4715 3.04021   1
   2   0   1 5.44549 2.86605   8
   0   2   1 9.00812 2.56029   4
   2   0   1 5.36381 2.40814   5
   2   0   1 5.77644 2.66471   1
   0  -2   1 4.08300 3.48043   4
  -2   0   1 5.13462 3.06362   6
   0   2   1 13.5157 4.24727   3
   2   0   1 6.86444 3.26016   3
   0  -2   1 9.32148 3.33908   1
   0  -2   1 12.1152 3.83958   2
  -2   0   1 4.76006 3.29608   8
  -2   0   2 82430.7 7327.91   6
   0  -2   2 78647.7 7328.17   2
   0  -2   2 78407.6 7327.69   4
  -2   0   2 86732.5 7328.10   7
   0  -2   2 83441.4 7328.33   5
   0   2   2 78308.2 7328.11   2
  -2   0   2 78657.1 7327.91   1
   2   0   2 78224.4 7327.96   7
   2   0   2 79633.9 7327.71   8
  -2   0   2 78721.8 7328.07   5
   0  -2   2 83375.4 7327.51   6
   0   2   2 79446.8 7327.44   7
   2   0   2 79824.5 7328.04   6
   0  -2   2 78402.9 7328.00   1
  -2   0   2 77383.7 7327.82   3
  -2   0   2 76389.9 7327.56   2
   0   2   2 78267.2 7328.02   3
  -2   0   2 77377.2 7328.06   8
   0   2   2 78989.5 7328.15   8
   0   2   2 77628.8 7327.66   4
   2   0   2 77299.9 7327.69   5
  -2   0   2 77997.9 7328.10   4
  -2   0   3 222.260 23.3775   4
   0  -2   3 189.847 24.0464   7
   2   0   3 175.797 22.5651   5
   2   0   3 196.608 23.1112   7
   0   2   3 209.751 21.9443   5
  -2   0   3 308.942 23.1772   2
   2   0   3 214.657 23.5847   6
   0  -2   3 329.433 23.9740   1
   0   2   3 358.529 24.6716   2
   0  -2   3 225.317 24.2258   5
   0   2   3 192.766 22.4206   7
  -2   0   3 179.057 22.9373   6
   0   2   3 354.750 25.5645   1
  -2   0   3 337.463 24.1140   1
   0  -2   3 173.123 22.4291   6
   0   2   3 282.844 24.1918   3
  -2   0   3 262.895 23.5136   3
   0  -2   3 204.741 22.0122   4
  -2   0   3 192.536 23.1666   5
   2   0   3 190.306 22.4502   8
  -2   0   3 191.873 23.2470   7
  -2   0   3 181.856 22.8441   8
  -2   0   4 32239.3 3172.03   3
  -2   0   4 33708.3 3172.12   6
  -2   0   4 34504.6 3171.91   4
   0   2   4 33664.6 3172.69   1
   0   2   4 37082.2 3171.42   5
   0  -2   4 33991.7 3172.50   7
   0   2   4 34993.2 3172.58   3
   2   0   4 35139.5 3171.72   8
   2   0   4 33040.6 3172.46   2
  -2   0   4 33704.4 3172.29   1
   2   0   4 35578.1 3171.85   5
   0   2   4 34207.8 3171.66   7
  -2   0   4 34360.4 3172.11   5
   2   0   4 34397.4 3172.20   7
   0  -2   4 37611.1 3172.77   5
   0  -2   4 33812.2 3171.29   4
   0  -2   4 32256.6 3172.30   3
  -2   0   4 33867.7 3171.84   8
  -2   0   4 34838.3 3172.21   7
  -2   0   4 32229.4 3171.74   2
   0   2   4 34756.1 3172.45   2
   2   0   5 964.757 102.157   5
   0   2   5 1485.66 104.322   2
   0  -2   5 881.876 102.727   7
   0  -2   5 1100.58 103.461   3
   0  -2   5 869.531 100.878   4
  -2   0   5 951.872 102.136   5
   0   2   5 880.760 101.624   7
   2   0   5 923.401 102.478   7
   0   2   5 936.169 101.432   5
   0  -2   5 946.080 103.126   5
  -2   0   5 1196.78 103.178   3
  -2   0   5 954.197 101.737   4
   0   2   5 1266.15 104.299   3
  -2   0   5 962.028 102.448   7
  -2   0   5 1506.65 103.406   2
   2   0   5 1397.70 104.246   2
   0   2   5 1603.24 105.391   1
  -2   0   5 1636.77 104.686   1
   2   0   6 670.634 71.1690   2
   0   2   6 699.195 70.9145   2
   0  -2   6 794.911 71.9081   5
  -2   0   6 779.452 70.7315   5
   2   0   6 821.670 70.3761   5
  -2   0   6 700.073 70.8344   3
   0  -2   6 741.440 71.3302   7
  -2   0   6 640.590 70.7090   1
   0  -2   6 643.617 70.9679   3
   2   0   6 705.361 70.6200   7
   0  -2   6 667.726 68.4918   4
   0   2   6 782.002 69.2982   5
   0   2   6 728.064 70.0260   7
  -2   0   6 713.404 69.5861   4
   0   2   6 686.422 71.7361   1
  -2   0   6 747.585 71.0062   7
   2   0   6 673.204 71.6968   3
  -2   0   6 665.639 70.1621   2
   0   2   6 715.654 71.8392   3
   0   2   7 59.0853 14.3112   5
   0  -2   7 35.8188 18.2771   3
  -2   0   7 70.8949 17.3734   3
   0   2   7 33.8000 15.3343   7
   2   0   7 29.8695 17.1573   7
   0  -2   7 38.9144 18.8449   7
  -2   0   7 78.4492 15.8523   2
   2   0   7 33.4569 19.4281   3
  -2   0   7 59.3217 16.2796   5
  -2   0   7 50.9125 17.7306   1
   2   0   7 109.340 19.0169   2
   2   0   7 67.8132 16.7497   5
  -2   0   7 46.0847 13.3500   4
   0  -2   7 39.2802 17.8438   5
   0   2   7 44.0400 17.8903   1
  -2   0   7 38.0130 17.8598   7
   0   2   7 60.8246 18.5802   3
   0   2   7 97.2679 18.2521   2
   0  -2   7 33.7957 11.1521   4
   0  -2   8 300.785 40.7966   5
   0   2   8 378.702 39.8540   7
   0  -2   8 326.325 41.5372   3
   0   2   8 331.496 42.0195   1
   2   0   8 312.208 42.1496   3
  -2   0   8 386.486 39.8975   2
   2   0   8 327.349 40.4164   7
  -2   0   8 337.062 39.5754   5
  -2   0   8 351.590 41.5086   3
  -2   0   8 326.252 40.9485   7
   2   0   8 335.232 41.1908   2
   0   2   8 350.833 41.0498   2
   2   0   8 389.289 40.4657   5
   0  -2   8 330.941 36.0092   4
   0   2   8 284.582 37.0695   5
   0   2   8 413.496 42.9969   3
   0  -2   8 394.317 42.0409   7
   0   2   9 69.6145 21.8249   5
   0  -2   9 68.2770 28.3946   3
   0   2   9 86.6062 30.1335   3
  -2   0   9 53.5302 24.6975   2
   0   2   9 181.688 27.5978   2
   0  -2   9 68.6669 28.9239   7
   2   0   9 77.5560 28.4006   2
   0   2   9 67.8526 24.3347   7
   0  -2   9 35.6979 27.5399   5
  -2   0   9 66.3232 26.3188   7
  -2   0   9 27.0416 23.3275   5
   0   2   9 122.969 29.3346   1
   2   0   9 169.721 31.9206   3
   0  -2   9 51.1985 16.7878   4
   2   0   9 46.3857 23.8523   5
  -2   0   9 93.4952 28.1398   3
   2   0   9 53.9264 26.3754   7
   2   0  10 2.71573 29.0472   3
   0  -2  10 17.9590 29.0105   3
   0   2  10 2.10049 26.6226   7
   0  -2  10 2.50904 28.7954   7
   2   0  10 47.0581 27.7456   2
   0  -2  10 2.35129 27.1377   5
   0   2  10-2.62448 29.1131   3
  -2   0  10 61.8396 24.9086   5
  -2   0  10 38.4888 27.9071   7
   2   0  10-18.8414 27.4742   7
   0   2  10 6.57304 19.1369   5
   0   2  10 47.9448 25.1641   2
   2   0  10 23.9875 25.4161   5
  -2   0  10 12.3150 27.8544   3
  -2   0  11 23.9055 22.7898   5
   2   0  11 13.0958 26.4819   7
   0  -2  11 38.9998 27.4951   7
   2   0  11 15.0115 29.3368   3
  -2   0  11-5.05550 28.2884   7
   2   0  11 2.76407 26.9443   2
   0   2  11 56.4615 25.5641   7
   0   2  11 7.96610 27.3462   2
   2   0  11 11.0901 25.5295   5
   0   2  11-20.3844 27.7330   3
   0  -2  11-2.85973 28.9783   3
  -2   0  11-11.0065 29.1565   3
   0  -2  11 7.58324 24.7682   5
   0   2  12-26.0512 29.6551   2
   0  -2  12 19.1077 30.1486   3
   0  -2  12 24.2007 25.5929   5
   0  -2  12 3.07311 30.0873   7
   0   2  12-15.6673 28.0055   7
   2   0  12-23.1636 28.0634   7
  -2   0  12 6.08089 29.0902   3
   0   2  12 66.8008 31.2986   3
  -2   0  12-13.9379 30.0209   7
   2   0  12 26.3446 31.0082   3
   2   0  13 35.9041 34.3812   3
   0  -2  13 33.3759 35.7488   7
   0   2  13-45.1629 32.2094   3
   0  -2  13 17.4558 35.5493   3
   0   2  13 22.1940 29.0723   2
  -2   0  13 45.7626 33.0899   7
  -2   0  13 3.33622 30.6744   3
   2   0  13 28.5121 31.2810   7
   2   0  14 3.43765 33.0487   7
  -2   0  14-18.1464 35.6878   3
   2   0  14 7.74620 33.6678   3
   0  -2  14 34.1572 35.6098   3
   0  -2  14 21.5773 36.7391   7
   0  -2  15-30.7148 38.8850   7
   2   0  15 37.2909 39.7490   3
  -2   0  15-15.6009 37.4164   3
   0  -2  15 8.14980 36.4587   3
   0   2  15-27.9328 37.2713   3
  -1   2 -15-27.8728 42.2969   1
   2   1 -15 3.71906 32.7679   2
  -2  -1 -15 4.11640 35.2469   2
  -1   2 -15 41.3751 34.8439   2
   2   1 -15-16.9500 38.1337   1
   1  -2 -15 48.1041 33.7887   2
   1  -2 -15-26.0052 37.5937   1
  -2  -1 -15-27.8566 40.6531   1
   1  -2 -14 42.2269 32.5258   6
   2   1 -14 19.5445 34.4582   1
  -2  -1 -14-3.16892 31.4280   6
  -2  -1 -14 80.4047 35.7736   2
  -2  -1 -14 34.2295 35.5598   1
   2   1 -14 3.46632 29.7013   2
   1  -2 -14-13.6916 30.1788   2
  -1   2 -14 7.73666 34.1010   2
   1  -2 -14-20.0837 33.5005   1
  -1   2 -14-4.25991 35.7704   1
  -2  -1 -13-27.2754 35.7856   1
  -2  -1 -13 47.3157 30.4347   6
  -1   2 -13 29.1531 33.0857   2
   2   1 -13 24.3169 27.5543   6
   1  -2 -13-3.70269 33.6173   1
   1  -2 -13-6.09941 29.9326   6
   2   1 -13-3.57756 30.3333   1
  -1   2 -13 2.58351 26.2258   6
   2   1 -13 3.25412 29.0254   2
  -1   2 -13-30.8265 37.4406   1
   1  -2 -12 22.7012 28.0094   6
   2   1 -12 19.9663 25.9964   6
  -1   2 -12 45.0119 31.1787   1
  -1   2 -12 2.35443 25.0625   6
   2   1 -12 33.2680 29.1061   2
  -2  -1 -12 31.6934 30.5646   1
   1  -2 -12-3.38966 31.2372   1
   2   1 -12 16.1762 29.7318   1
  -1   2 -12 10.1948 31.2281   2
   1  -2 -12-27.8899 25.8661   8
  -2  -1 -12 13.5888 28.4292   6
  -2  -1 -11-46.8901 25.9656   6
   2   1 -11-8.28422 27.3697   2
  -1   2 -11-10.6358 22.1373   6
   1  -2 -11-26.2139 27.9951   6
  -1   2 -11-18.6861 27.7770   2
  -1   2 -11 24.7009 29.9235   1
   2   1 -11 1.86130 18.9810   8
  -2  -1 -11 22.1434 28.2988   1
   2   1 -11 29.6683 25.4251   6
   1  -2 -11-30.8777 22.8001   8
  -2  -1 -11 24.0463 20.0837   8
   2   1 -11 58.2046 26.4981   1
   1  -2 -11 36.9930 27.2455   1
   1  -2 -10 39.3771 24.5909   8
  -1   2 -10 67.7955 19.0624   8
  -1   2 -10 55.2467 25.3034   6
   1  -2 -10-2.40081 27.6871   6
  -1   2 -10 136.754 31.9267   1
   2   1 -10 95.4692 29.8484   1
  -2  -1 -10 64.8469 31.6466   1
   2   1 -10 109.288 28.5604   2
   2   1 -10 35.1931 25.7884   6
  -2  -1 -10 35.6826 23.1107   8
   2   1 -10 75.5690 21.1866   4
   2   1 -10 3.46035 21.9663   8
  -1   2 -10 112.610 32.9541   2
  -2  -1 -10 35.5673 27.7042   6
   1  -2  -9 67.0935 18.6050   4
   1  -2  -9 131.201 26.9780   8
  -2  -1  -9 169.145 31.9058   1
  -1   2  -9 35.1802 30.1699   2
   2   1  -9 134.489 29.6545   2
   2   1  -9 31.7316 27.0726   1
  -1   2  -9 59.6644 27.8226   1
  -2  -1  -9 117.192 23.4483   8
  -2  -1  -9 151.315 27.3961   6
   2   1  -9 89.1729 24.7447   6
   1  -2  -9 91.4601 29.1669   6
  -1   2  -9 149.540 25.3426   6
  -1   2  -9 78.6376 19.2164   8
   2   1  -9 95.2039 22.6638   8
  -1   2  -8 27.8372 16.9612   6
   2   1  -8 55.0639 20.7368   1
   2   1  -8 38.9097 15.4900   8
   1  -2  -8 39.6620 13.2051   4
  -2  -1  -8 42.3447 9.11897   4
  -1   2  -8 68.2512 21.3012   1
   1  -2  -8 24.9799 20.7509   6
  -2  -1  -8 27.5974 17.2807   8
   2   1  -8 35.9614 18.5305   6
  -2  -1  -8 19.4040 18.6692   6
  -1   2  -8 46.4481 23.5492   2
   1  -2  -8 27.6759 18.4762   8
  -1   2  -8 37.9399 13.8901   8
  -2  -1  -8 69.5163 23.4789   1
  -2  -1  -7 26.4397 8.07318   4
  -1   2  -7 15.9125 17.7450   1
  -2  -1  -7 26.2807 16.2556   6
  -2  -1  -7 38.7203 8.08204   4
   2   1  -7 57.1674 15.2293   8
  -1   2  -7 70.5610 9.91190   4
  -1   2  -7 25.4717 11.5262   8
   1  -2  -7 24.7115 16.9302   8
   1  -2  -7 52.6452 17.1932   6
   1  -2  -7 33.7173 11.6969   4
   2   1  -7 45.0627 15.1627   6
  -2  -1  -7 58.8195 14.3729   8
   2   1  -7 21.7843 16.6142   1
  -1   2  -7 21.3403 13.9926   6
  -2  -1  -6 69.1411 17.2620   6
   2   1  -6 114.686 17.5810   1
  -1   2  -6 115.909 18.2691   1
   2   1  -6 75.2785 15.2081   6
   1  -2  -6 83.0673 16.0893   8
  -1   2  -6 61.4459 12.3479   8
  -1   2  -6 67.5072 14.1622   6
   1  -2  -6 66.2846 17.6654   6
  -2  -1  -6 60.8185 9.31686   4
  -2  -1  -6 79.1887 9.83585   4
  -2  -1  -6 45.6368 14.6420   8
   1  -2  -6 60.6214 12.6275   4
  -1   2  -6 87.5956 10.9378   4
   2   1  -6 57.5335 14.0102   8
  -2  -1  -5 10016.7 915.737   8
   1  -2  -5 10010.2 915.148   5
   2   1  -5 10285.9 916.087   6
   1  -2  -5 9007.73 915.099   4
  -2  -1  -5 9378.38 914.827   5
  -1   2  -5 10398.5 914.986   8
  -1   2  -5 9962.89 915.614   6
  -2  -1  -5 9809.81 914.014   4
  -1   2  -5 10249.5 914.859   8
  -1   2  -5 9579.49 916.624   1
  -2  -1  -5 9993.18 914.171   4
   1  -2  -5 10100.2 916.762   6
  -1   2  -5 9882.41 914.476   4
   1  -2  -5 9592.34 916.362   8
  -2  -1  -5 10037.5 916.390   6
   1  -2  -4 752.514 71.9053   4
  -1   2  -4 693.602 71.2093   8
   2   1  -4 739.385 72.2201   8
  -2  -1  -4 773.502 71.5669   5
  -2  -1  -4 672.194 72.5381   8
  -1   2  -4 684.162 71.2552   8
   1  -2  -4 755.695 73.3494   8
   1  -2  -4 746.258 71.9249   7
  -1   2  -4 787.382 71.1019   4
  -2  -1  -4 780.026 73.3248   6
  -2  -1  -4 767.929 70.6554   4
  -1   2  -4 707.092 72.0121   6
   2   1  -4 781.298 72.2599   6
   1  -2  -4 809.165 71.9624   5
   2   1  -4 789.026 72.4452   4
  -1   2  -4 1150.58 74.7257   1
  -2  -1  -4 733.638 70.4816   4
   1  -2  -4 744.354 71.8149   4
  -1   2  -3 6927.94 676.961   2
   1  -2  -3 7637.67 676.276   7
   2   1  -3 7703.89 676.612   2
   1  -2  -3 7617.86 677.297   8
   1  -2  -3 7977.71 677.233   8
   1  -2  -3 7945.48 677.344   1
   1  -2  -3 7528.24 676.852   2
   2   1  -3 7265.63 676.915   7
   1  -2  -3 8218.67 676.378   5
   2   1  -3 7747.78 676.929   1
  -2  -1  -3 6562.38 675.501   4
  -2  -1  -3 7081.82 676.001   5
  -1   2  -3 7366.78 676.846   5
   1  -2  -3 7371.41 676.740   3
   2   1  -3 7941.10 677.082   3
  -2  -1  -3 7254.24 676.698   8
  -2  -1  -3 7315.06 677.105   6
  -2  -1  -3 7275.72 676.476   7
  -1   2  -3 6944.13 677.079   3
   1  -2  -3 6684.33 676.411   4
   2   1  -3 7632.77 676.736   4
  -1   2  -3 7115.11 676.405   6
  -2  -1  -3 7467.59 677.303   1
   1  -2  -3 8357.37 677.344   6
  -1   2  -3 7308.19 675.843   8
   2   1  -3 7677.29 676.464   6
   1  -2  -3 7180.90 676.509   4
  -1   2  -3 7108.52 675.900   4
   2   1  -3 7548.36 676.604   8
  -2  -1  -3 6901.05 675.451   4
   2   1  -3 8033.62 677.264   5
  -1   2  -2 279.588 30.1007   5
   2   1  -2 291.480 29.7618   4
   2   1  -2 461.050 29.8244   2
   2   1  -2 235.900 29.0814   6
   1  -2  -2 280.802 28.9292   7
   1  -2  -2 439.727 30.4772   2
   2   1  -2 290.772 30.3811   5
   2   1  -2 379.118 29.7406   2
  -2  -1  -2 219.457 29.1880   7
  -2  -1  -2 257.601 28.7880   5
   1  -2  -2 336.454 29.8092   3
  -1   2  -2 249.899 29.0862   6
  -2  -1  -2 260.812 29.7712   8
   2   1  -2 225.504 30.0907   7
   1  -2  -2 284.324 29.0332   5
  -1   2  -2 368.205 30.4853   3
   1  -2  -2 294.151 29.6362   4
   1  -2  -2 285.301 29.2085   5
  -1   2  -2 289.672 28.9507   4
   2   1  -2 390.060 30.3339   3
   2   1  -2 277.292 29.4657   8
  -2  -1  -2 476.192 31.0444   1
   2   1  -2 519.591 30.2405   1
   2   1  -1 16686.3 1553.20   3
  -2  -1  -1 16680.3 1553.14   7
   1  -2  -1 16856.5 1553.18   2
   1  -2  -1 15995.6 1553.32   6
   1  -2  -1 16070.6 1552.89   5
  -1   2  -1 17460.2 1553.36   7
  -2  -1  -1 16609.3 1553.41   2
  -1   2  -1 17143.3 1553.07   4
  -2  -1  -1 16929.8 1553.34   1
  -1   2  -1 17160.4 1553.08   6
   2   1  -1 17554.2 1553.28   8
  -2  -1  -1 16792.0 1553.32   3
  -1   2  -1 16903.7 1553.34   3
   2   1  -1 16627.3 1552.93   2
   1  -2  -1 17169.5 1553.01   3
  -2  -1  -1 16836.6 1552.95   5
   2   1  -1 17146.0 1552.97   6
  -2  -1  -1 16315.1 1552.91   4
   2   1   0 67.6712 6.73879   4
  -1   2   0 55.9354 6.45827   6
   2   1   0 56.0233 6.48266   6
  -2  -1   0 63.7153 6.55819   6
   1  -2   0 66.0329 6.31855   3
   1  -2   0 58.2977 6.44556   5
  -2  -1   0 46.7946 6.53601   8
  -1   2   0 62.9825 6.38664   5
  -1   2   0 50.3547 6.54703   8
   1  -2   0 59.5725 6.72717   4
  -2  -1   0 70.1259 7.02034   3
   2   1   0 55.8260 6.90589   7
   2   1   0 95.1747 6.70068   2
   1  -2   0 54.3287 6.38239   6
   2   1   0 59.7020 6.97329   5
  -1   2   0 87.6737 6.76741   2
   2   1   0 52.9281 7.15361   3
   1  -2   1 17546.6 1585.68   6
   1  -2   1 17583.7 1586.00   3
  -2  -1   1 16990.4 1585.60   6
   1  -2   1 17190.3 1585.71   4
  -1   2   1 17154.8 1585.97   4
  -2  -1   1 17465.0 1585.87   3
   2   1   1 16863.6 1585.57   5
   2   1   1 17251.2 1585.98   1
  -1   2   1 16281.9 1586.01   1
  -2  -1   1 17622.0 1585.94   8
  -1   2   1 16891.5 1585.66   3
  -2  -1   1 17140.3 1585.62   2
  -1   2   1 17013.4 1585.55   5
   2   1   1 17256.4 1585.51   4
  -1   2   1 17055.4 1585.88   2
   2   1   1 17397.7 1585.80   7
   2   1   1 17082.1 1585.91   8
   2   1   2 252.522 28.4859   7
  -1   2   2 464.875 29.6467   2
   2   1   2 265.518 28.8225   8
   2   1   2 428.652 30.0521   1
  -2  -1   2 292.964 29.0114   4
   1  -2   2 435.485 29.9079   1
  -2  -1   2 255.728 28.3442   6
  -2  -1   2 496.505 29.2502   1
  -1   2   2 264.015 27.9408   7
   2   1   2 254.095 29.3458   6
  -1   2   2 273.114 29.3734   8
   1  -2   2 264.890 27.9299   4
  -2  -1   2 246.561 29.1957   5
   2   1   2 235.718 27.8768   5
  -1   2   2 253.884 29.1976   6
  -1   2   2 276.356 28.6225   4
   1  -2   2 228.496 28.1110   6
  -1   2   2 470.173 30.5976   1
  -2  -1   2 267.309 28.5737   8
  -2  -1   2 281.505 29.6925   7
  -1   2   2 371.954 29.0039   3
   1  -2   2 272.819 29.5146   5
   2   1   3 7740.74 721.102   7
   2   1   3 7980.70 721.581   6
   1  -2   3 7539.60 720.313   8
  -1   2   3 8286.30 721.809   6
  -2  -1   3 7686.81 721.317   3
   1  -2   3 7613.19 721.594   7
  -2  -1   3 8116.73 721.379   1
   2   1   3 7769.13 721.168   8
  -1   2   3 7858.46 721.767   1
   1  -2   3 7958.78 720.928   6
   1  -2   3 7731.21 721.407   1
   1  -2   3 7562.31 720.400   4
  -2  -1   3 8062.66 721.650   5
  -2  -1   3 8183.36 721.623   7
  -1   2   3 7551.55 721.376   3
  -1   2   3 7721.93 721.317   2
  -2  -1   3 7776.01 721.016   8
   2   1   3 7637.55 720.665   5
  -1   2   3 8128.43 720.673   5
  -2  -1   3 7819.22 720.962   6
   1  -2   3 7599.58 721.538   5
  -1   2   3 7790.31 720.740   7
  -2  -1   3 7542.33 721.186   4
   2   1   4 720.572 81.9121   7
   1  -2   4 795.328 80.6804   4
  -1   2   4 1005.45 83.2658   3
  -2  -1   4 1379.00 83.9461   1
  -2  -1   4 786.924 81.6920   4
  -1   2   4 788.154 81.2575   5
   1  -2   4 737.953 81.6227   6
   1  -2   4 818.189 82.6423   5
  -2  -1   4 734.809 81.2897   8
  -1   2   4 746.061 82.8740   6
  -2  -1   4 839.966 82.7637   5
  -1   2   4 773.063 81.5928   7
  -2  -1   4 1178.80 82.6523   2
  -1   2   4 1306.17 83.8279   2
   1  -2   4 695.445 82.3722   7
  -2  -1   4 733.800 81.6522   6
  -2  -1   4 966.248 82.8147   3
   2   1   4 1262.74 84.1715   2
  -2  -1   4 737.486 82.4885   7
   2   1   4 807.623 81.3764   5
  -1   2   4 1307.67 84.6081   1
  -1   2   5 9916.86 928.937   3
   2   1   5 10950.3 927.954   5
  -2  -1   5 10390.6 928.813   7
  -2  -1   5 10057.7 927.754   8
  -1   2   5 9468.22 928.963   1
   1  -2   5 10388.4 929.072   7
   1  -2   5 10032.7 926.956   4
   2   1   5 9884.89 928.271   7
  -1   2   5 10053.5 927.961   7
   2   1   5 10060.2 929.397   3
  -1   2   5 9758.19 927.539   5
  -1   2   5 9797.22 928.554   2
  -2  -1   5 9240.86 927.903   2
  -2  -1   5 9668.63 927.871   4
  -2  -1   5 9073.49 928.421   3
  -2  -1   5 10805.0 928.937   5
   1  -2   5 11419.4 929.174   5
   2   1   5 9820.25 929.049   2
   1  -2   6 50.8167 11.4007   4
  -1   2   6 67.0077 15.5423   7
   2   1   6 125.909 18.2637   2
  -2  -1   6 86.3547 17.7154   7
  -1   2   6 106.701 17.1729   2
  -1   2   6 91.1111 18.8197   1
   1  -2   6 108.099 18.8192   3
  -2  -1   6 66.2389 16.8766   5
   1  -2   6 54.0650 16.6953   7
   1  -2   6 63.8217 17.5302   5
  -2  -1   6 61.8786 13.7925   4
  -1   2   6 88.1580 14.1176   5
  -2  -1   6 129.312 15.7303   2
   2   1   6 58.5899 16.0987   7
  -1   2   6 76.2911 17.8240   3
   2   1   6 100.682 18.8923   3
   2   1   6 88.3692 15.1062   5
  -2  -1   6 84.1144 16.9520   3
   1  -2   7 46.0985 18.5385   7
   2   1   7 17.0540 19.2121   3
   1  -2   7 48.5619 17.4293   5
  -1   2   7 46.6590 17.6967   3
   1  -2   7 41.9785 18.3887   3
   2   1   7 37.0100 13.6742   5
  -1   2   7 21.6836 16.4605   1
  -1   2   7 41.1076 15.5695   2
  -2  -1   7 46.0895 12.9547   4
   1  -2   7 31.8091 9.59330   4
   2   1   7 38.6763 17.3637   2
  -2  -1   7 31.1100 16.4601   5
  -1   2   7 27.9631 15.3470   7
  -1   2   7 27.8406 13.1025   5
  -2  -1   7 46.2729 14.8454   2
  -2  -1   7 24.2174 17.5285   7
  -2  -1   7 41.8961 16.8068   3
   2   1   7 43.1225 16.7119   7
  -2  -1   8 52.1231 22.0376   7
   2   1   8 58.0318 21.8813   2
  -2  -1   8 69.8635 21.6384   3
   1  -2   8 49.9572 21.0711   5
  -1   2   8 85.4261 22.1360   1
  -1   2   8 58.2111 17.0599   5
   2   1   8 44.9693 20.1684   7
  -2  -1   8 68.4060 15.6928   4
   2   1   8 101.828 24.7202   3
   1  -2   8 31.1273 11.6224   4
   1  -2   8 70.6585 23.4942   7
   1  -2   8 42.7588 21.0052   3
  -1   2   8 51.4044 18.7154   2
   2   1   8 34.5415 17.8277   5
  -1   2   8 72.5291 19.4992   7
  -2  -1   8 54.5544 20.2453   5
  -1   2   8 28.0270 21.3121   3
  -1   2   9 149.339 28.0981   2
  -2  -1   9 90.8051 29.3886   7
   1  -2   9 147.258 29.9111   7
   2   1   9 188.841 29.5283   7
   1  -2   9 113.854 28.9152   5
   2   1   9 141.084 25.9080   5
  -2  -1   9 94.8023 21.5143   4
  -1   2   9 120.085 22.4319   5
  -1   2   9 71.1783 28.1112   1
   2   1   9 85.6271 28.3439   2
   1  -2   9 81.5063 28.6760   3
   2   1   9 95.6237 30.5735   3
  -2  -1   9 78.5330 26.1738   5
  -1   2   9 142.163 26.8237   7
  -1   2   9 95.4867 29.9196   3
  -2  -1   9 86.5062 28.5576   3
   2   1  10 79.5220 23.3455   5
   1  -2  10 71.4806 28.1265   5
  -1   2  10 56.1302 26.6852   7
  -2  -1  10 70.8420 26.1534   5
   1  -2  10 30.2135 29.9439   7
   2   1  10 75.5039 29.2141   2
  -1   2  10 81.2075 27.9268   2
  -2  -1  10 59.3732 28.2691   7
  -1   2  10 71.5613 30.3770   3
   2   1  10 92.9079 31.7275   3
   1  -2  10 120.794 31.3896   3
  -1   2  10 41.2966 21.1549   5
  -2  -1  10 86.2724 30.3654   3
   2   1  10 24.6065 26.0228   7
  -1   2  11-5.66611 27.4586   3
   2   1  11 20.1405 26.8884   7
   1  -2  11 10.1979 26.2389   5
  -1   2  11 16.2617 25.2254   7
   2   1  11-22.2424 26.2511   2
   1  -2  11-2.79566 28.7070   7
  -2  -1  11 7.01403 24.5480   5
  -2  -1  11-2.63839 28.1195   7
   1  -2  11 26.3111 28.9070   3
  -2  -1  11 24.7924 27.1049   3
  -1   2  11 5.12482 25.5848   2
   2   1  11-24.1906 30.7660   3
  -1   2  12 5.13855 28.1928   7
  -2  -1  12 5.80849 29.2179   7
  -1   2  12 49.8394 30.1253   3
   1  -2  12 18.9591 26.6633   5
  -1   2  12-2.81103 27.3970   2
   2   1  12 33.4208 27.6865   7
  -2  -1  12-10.0440 26.0897   5
   1  -2  12 12.3375 30.5097   7
   2   1  12 19.8415 29.6856   3
   2   1  12 9.15875 27.6512   2
  -2  -1  12-15.2789 29.9296   3
   1  -2  12 3.22207 30.8392   3
  -2  -1  13-3.17433 31.4629   7
  -1   2  13-13.6114 32.2992   3
   2   1  13 28.7374 30.9595   3
  -2  -1  13 3.35810 32.4623   3
   2   1  13 48.7944 30.7389   7
   1  -2  13-59.9633 36.6263   3
   1  -2  13-23.6478 33.0731   7
  -2  -1  14 13.7805 34.8962   7
  -2  -1  14 7.29234 33.2076   3
   2   1  14-27.1615 35.5416   3
  -1   2  14-22.0789 33.8031   3
   1  -2  14-18.1711 36.1164   7
   1  -2  14 3.83017 36.0715   3
   2   1  15 4.14839 37.9146   3
  -1   2  15 51.2342 36.1267   3
   1  -2  15-23.2552 38.8218   7
   1  -2  15 32.8663 37.9771   3
  -2  -2 -15 32.4579 38.1612   1
   2   2 -15 12.7686 36.0141   3
   2  -2 -15 10.7507 30.7427   2
  -2   2 -15 113.950 41.2255   1
  -2   2 -15 29.8767 36.2351   2
   2   2 -15 64.1980 37.9881   1
  -2  -2 -15-40.7621 36.6225   2
   2   2 -15-7.65018 33.3371   2
   2  -2 -15 21.1450 36.6131   1
  -2   2 -14-3.98883 33.0226   2
   2   2 -14-3.93364 33.3531   1
   2  -2 -14 22.7105 30.6330   6
   2  -2 -14-9.96102 31.6855   2
   2   2 -14-7.21604 33.6977   2
  -2   2 -14-8.69303 36.8532   1
  -2  -2 -14 4.27590 36.8538   1
  -2  -2 -14 9.86101 31.6958   6
   2  -2 -14-51.0376 35.1234   1
   2   2 -13 36.9440 31.5399   2
  -2   2 -13 11.2621 33.2824   2
   2  -2 -13-50.7168 32.2154   1
  -2   2 -13-7.85249 37.1694   1
  -2  -2 -13 18.3454 30.0854   6
   2   2 -13-14.3528 29.9133   1
   2  -2 -13-30.5885 32.2552   6
  -2  -2 -13 82.1497 33.9336   1
  -2   2 -13 18.3196 25.3671   6
   2   2 -12 15.3936 26.7921   2
  -2  -2 -12 7.11022 31.7102   1
  -2  -2 -12-2.13727 23.1615   8
  -2  -2 -12 8.46845 27.0088   6
   2  -2 -12-37.1285 28.9248   6
   2  -2 -12 19.9481 30.9659   1
   2   2 -12-29.2061 31.6123   1
   2  -2 -12-31.1846 24.9118   8
  -2   2 -12 45.8225 32.4648   1
   2   2 -12-30.6630 25.6644   6
  -2   2 -12 21.4132 23.6999   6
  -2   2 -12-10.4963 32.1339   2
  -2  -2 -11 57.7918 31.5302   1
  -2  -2 -11 43.6955 27.0990   6
  -2   2 -11 12.8256 30.7765   2
  -2  -2 -11 51.7251 21.4801   8
   2   2 -11 23.1800 26.4993   1
   2  -2 -11 24.2003 29.1981   1
   2   2 -11 23.6685 22.3323   6
   2   2 -11 28.3942 27.4903   2
  -2   2 -11 29.8824 23.9550   6
  -2   2 -11 31.5044 29.0396   1
   2  -2 -11-11.4494 24.9364   8
   2  -2 -11 13.2498 26.0619   6
  -2  -2 -10 76.9752 25.6628   8
   2   2 -10 28.4414 29.1976   2
  -2   2 -10 68.0678 18.5815   8
  -2   2 -10 99.6102 26.0174   6
   2  -2 -10 38.9070 28.7172   6
   2  -2 -10 60.1524 20.0059   4
  -2   2 -10 38.9428 29.8396   1
  -2  -2 -10 63.1637 31.4101   1
   2   2 -10 48.3907 23.7696   6
   2  -2 -10 66.4000 25.6545   8
  -2  -2 -10 44.3095 28.3200   6
   2   2 -10 20.5746 27.4763   1
   2   2 -10 19.1243 20.6312   8
  -2   2 -10 28.9912 30.8733   2
  -2  -2  -9 330.988 45.8816   6
  -2   2  -9 272.402 42.9179   6
   2  -2  -9 256.720 46.9723   6
  -2  -2  -9 567.752 53.8893   1
  -2   2  -9 595.091 53.2759   1
  -2   2  -9 351.515 40.8246   8
   2   2  -9 362.861 43.0470   8
   2  -2  -9 332.704 41.3193   4
  -2  -2  -9 367.329 43.6087   8
   2  -2  -9 292.752 44.7609   8
   2   2  -9 491.045 50.6194   2
   2   2  -9 303.985 42.8757   6
   2   2  -9 554.754 49.2704   1
  -2   2  -9 401.555 51.8981   2
   2  -2  -8 92.2927 22.9845   8
   2   2  -8 138.961 19.7529   8
   2  -2  -8 96.2261 17.9294   4
  -2  -2  -8 83.9961 22.8518   6
  -2   2  -8 98.9171 17.3013   8
   2  -2  -8 39.0659 23.9940   6
  -2  -2  -8 85.4172 13.0146   4
   2   2  -8 104.850 25.3701   2
  -2  -2  -8 78.5969 21.3991   8
  -2   2  -8 103.338 25.2470   1
   2   2  -8 128.103 23.7484   1
  -2   2  -8 78.9342 20.4988   6
   2   2  -8 98.6486 20.8200   6
   2  -2  -7 253.981 33.0346   8
  -2   2  -7 286.768 31.0319   6
   2   2  -7 426.416 35.3073   1
  -2  -2  -7 252.382 31.8561   8
   2   2  -7 239.561 30.8644   6
  -2   2  -7 235.604 26.7763   4
  -2   2  -7 426.907 36.2851   1
  -2  -2  -7 247.540 33.5435   6
   2   2  -7 258.440 30.3726   8
  -2  -2  -7 253.036 27.1670   4
  -2   2  -7 232.201 28.6490   8
   2   2  -7 357.822 35.1109   2
  -2  -2  -7 271.530 26.9587   4
   2  -2  -7 235.768 29.2795   4
   2  -2  -7 280.691 34.1176   6
   2   2  -6 1226.88 117.402   1
  -2   2  -6 1094.41 117.960   1
  -2   2  -6 1204.14 116.566   6
   2   2  -6 1233.86 116.612   6
   2   2  -6 1248.22 118.078   2
  -2  -2  -6 1229.45 114.363   4
  -2   2  -6 1207.17 114.344   4
  -2  -2  -6 1242.84 117.949   6
  -2   2  -6 1207.43 115.302   8
  -2  -2  -6 1195.15 114.580   4
   2   2  -6 1295.54 116.367   8
   2  -2  -6 1346.95 118.038   8
   2  -2  -6 1190.84 116.027   4
  -2  -2  -6 1203.54 117.114   8
   2  -2  -6 1324.22 118.270   6
   2   2  -5 548.380 59.6692   6
  -2   2  -5 563.307 58.4818   8
  -2   2  -5 609.613 57.6415   4
   2   2  -5 894.266 62.4663   2
  -2  -2  -5 624.250 60.4496   8
  -2  -2  -5 572.388 58.2025   5
   2  -2  -5 576.606 59.6470   4
   2   2  -5 559.429 59.1605   8
  -2   2  -5 635.568 59.8084   6
  -2  -2  -5 575.573 57.7520   4
  -2  -2  -5 615.233 57.6604   4
   2  -2  -5 584.037 61.7340   8
  -2  -2  -5 543.483 61.3533   6
   2  -2  -4 1198.12 113.753   5
   2   2  -4 1178.24 113.563   8
  -2   2  -4 1201.48 113.932   6
  -2   2  -4 1229.55 112.976   8
   2  -2  -4 1169.62 113.613   7
  -2  -2  -4 1177.68 114.920   6
   2  -2  -4 1127.15 113.973   4
   2   2  -4 1135.41 114.439   2
  -2  -2  -4 1196.15 112.513   4
  -2   2  -4 1299.96 112.532   4
  -2  -2  -4 1161.82 112.776   5
  -2  -2  -4 1197.78 114.367   8
   2   2  -4 1332.32 113.676   6
   2   2  -4 1177.41 114.130   1
   2   2  -3 185.846 21.2902   6
  -2   2  -3 238.166 22.1758   6
   2   2  -3 202.895 22.3863   4
  -2   2  -3 215.386 20.7023   4
   2  -2  -3 177.587 21.6828   7
   2  -2  -3 186.852 22.2630   4
   2  -2  -3 224.115 22.2918   3
  -2  -2  -3 207.488 20.7376   5
   2  -2  -3 165.175 22.5076   8
   2  -2  -3 305.732 24.1674   1
   2  -2  -3 179.870 21.9331   5
   2   2  -3 235.937 23.0998   2
  -2  -2  -3 209.918 20.7820   4
  -2   2  -3 202.222 22.3795   5
   2   2  -3 340.606 23.1611   1
   2   2  -3 291.834 22.8016   2
   2  -2  -3 281.160 22.7949   2
   2  -2  -3 166.904 22.0383   4
  -2  -2  -3 184.917 21.5050   7
   2   2  -3 194.028 21.5933   8
  -2  -2  -3 157.935 22.4592   8
   2   2  -3 314.263 22.8999   1
  -2   2  -3 208.396 20.9299   8
   2   2  -3 244.992 23.6168   3
   2   2  -2 323616. 29867.3   6
  -2  -2  -2 328258. 29867.6   7
   2   2  -2 322177. 29867.8   1
  -2   2  -2 321743. 29868.0   5
   2   2  -2 329078. 29868.3   3
   2   2  -2 329359. 29868.1   4
   2  -2  -2 302503. 29867.4   7
  -2  -2  -2 327243. 29867.2   5
  -2   2  -2 330579. 29868.3   2
  -2  -2  -2 290462. 29868.0   8
   2  -2  -2 323275. 29867.7   2
   2  -2  -2 333660. 29868.2   4
  -2   2  -2 325936. 29867.3   4
  -2   2  -2 328596. 29868.3   3
   2   2  -2 323976. 29868.0   2
   2  -2  -2 326971. 29867.7   5
   2  -2  -2 329115. 29867.8   5
   2   2  -2 322106. 29867.6   8
  -2   2  -2 324044. 29867.9   6
  -2  -2  -2 321807. 29867.4   4
  -2   2  -2 316249. 29868.5   2
  -2  -2  -2 327050. 29868.4   1
   2  -2  -2 330775. 29867.7   3
   2  -2  -2 319204. 29868.1   1
   2  -2  -2 320334. 29868.2   4
  -2   2  -2 324992. 29867.3   8
  -2  -2  -1 361.598 42.5718   6
  -2  -2  -1 592.378 43.1875   2
  -2   2  -1 358.734 41.8508   8
   2   2  -1 419.736 42.9664   5
   2   2  -1 345.550 42.0154   8
  -2   2  -1 664.023 43.3862   1
  -2   2  -1 373.859 42.2755   7
   2  -2  -1 348.356 42.7205   8
  -2   2  -1 403.491 41.9538   4
   2  -2  -1 558.231 42.1543   2
  -2  -2  -1 406.991 41.8759   5
   2   2  -1 560.032 42.1997   2
   2  -2  -1 681.286 42.7904   1
  -2   2  -1 561.668 43.0947   2
  -2   2  -1 397.577 42.3076   6
   2   2  -1 642.776 42.2072   1
  -2  -2  -1 366.635 42.1376   7
   2   2  -1 430.123 42.3740   3
  -2  -2  -1 737.409 43.1515   1
   2  -2  -1 373.730 41.7919   7
   2  -2  -1 382.120 42.1265   5
  -2   2  -1 527.918 42.5426   3
  -2  -2  -1 395.187 42.0860   4
   2  -2   0 431.062 43.4874   4
   2  -2   0 400.846 43.4799   8
   2   2   0 440.544 43.4554   2
  -2  -2   0 433.393 43.2263   6
  -2  -2   0 447.717 43.4635   8
   2   2   0 593.020 43.8485   5
   2  -2   0 521.160 43.3314   7
  -2  -2   0 448.602 43.5914   5
   2  -2   0 389.515 43.2881   2
  -2  -2   0 507.581 43.7191   3
   2   2   0 455.018 43.4456   8
  -2   2   0 438.788 43.3676   5
  -2  -2   0 494.167 43.4169   2
  -2   2   0 430.546 43.4715   1
  -2   2   0 423.847 43.5629   8
   2   2   0 414.816 43.6023   7
  -2   2   0 423.297 43.2584   2
   2  -2   0 426.274 43.4523   6
   2   2   0 459.848 43.2803   6
  -2   2   0 448.127 43.2129   7
  -2   2   1 349.239 40.5945   5
   2   2   1 372.245 40.2242   5
  -2  -2   1 378.167 41.1042   4
   2  -2   1 368.635 40.2795   8
   2   2   1 678.376 41.5682   1
  -2  -2   1 615.407 40.5520   1
   2  -2   1 388.878 40.4275   4
   2  -2   1 514.387 41.3917   2
  -2  -2   1 405.207 40.7933   3
   2   2   1 386.026 41.0157   6
  -2   2   1 354.861 40.2572   7
   2  -2   1 374.094 40.6687   6
  -2  -2   1 343.127 40.5269   8
  -2   2   1 632.318 41.3720   1
  -2  -2   1 561.035 40.7972   2
   2   2   1 370.567 40.6824   7
   2   2   1 406.499 40.5565   4
  -2   2   1 574.763 40.7936   2
   2  -2   1 511.958 40.9373   3
  -2   2   2 318006. 25100.3   2
  -2  -2   2 333455. 25100.8   4
  -2   2   2 326941. 25100.3   3
   2  -2   2 329893. 25100.8   5
  -2  -2   2 320249. 25100.3   1
   2  -2   2 323717. 25100.3   6
  -2  -2   2 309099. 25101.2   5
  -2   2   2 324414. 25101.0   8
  -2  -2   2 329458. 25100.3   8
  -2  -2   2 303595. 25099.8   6
   2  -2   2 320664. 25099.7   8
   2   2   2 318808. 25100.2   7
  -2  -2   2 334612. 25100.5   2
   2   2   2 325248. 25100.7   8
   2  -2   2 324123. 25100.8   3
   2   2   2 328704. 25101.0   1
   2  -2   2 313156. 25099.7   4
   2   2   2 322801. 25099.8   4
  -2   2   2 326718. 25100.9   6
  -2   2   2 318336. 25100.9   1
  -2  -2   2 311019. 25101.0   7
   2  -2   3 237.271 20.7937   3
   2  -2   3 193.193 20.8583   7
  -2   2   3 172.849 20.1893   8
  -2   2   3 335.263 20.6218   2
  -2  -2   3 191.802 21.4734   5
   2  -2   3 73.8462 17.0544   4
  -2   2   3 298.359 21.7526   1
  -2   2   3 249.960 20.2857   3
  -2  -2   3 163.995 18.5224   6
   2   2   3 345.951 22.9865   1
   2  -2   3 216.416 20.6413   5
   2  -2   3 197.447 18.2974   8
   2   2   3 207.098 17.8151   4
  -2  -2   3 167.198 18.8537   8
   2   2   3 211.918 20.3699   8
  -2   2   3 209.106 19.0428   7
  -2  -2   3 180.177 21.1996   7
  -2   2   3 183.006 20.6385   6
   2  -2   3 193.967 19.3339   6
   2   2   3 234.959 21.5312   3
   2   2   3 191.861 18.1078   5
   2   2   3 203.228 19.1920   7
  -2  -2   3 190.478 19.6377   4
  -2   2   4 1142.59 74.3383   2
   2   2   4 1145.65 73.6859   7
  -2  -2   4 1192.12 75.5264   7
   2   2   4 1142.11 72.7450   5
   2   2   4 1132.57 75.5176   3
   2  -2   4 1198.85 75.3129   7
  -2   2   4 1107.89 75.2312   6
  -2  -2   4 1104.33 74.6428   3
   2   2   4 1144.70 75.6695   2
  -2  -2   4 1170.44 73.1563   8
  -2   2   4 1194.47 74.7768   3
   2  -2   4 1187.95 74.7875   5
  -2  -2   4 1085.57 73.7997   4
   2  -2   4 1144.06 75.0408   2
  -2  -2   4 1236.60 75.9557   5
  -2   2   4 1128.16 74.7887   8
   2  -2   4 1178.40 72.6448   8
  -2   2   4 1168.99 73.7320   7
  -2   2   4 1145.88 73.4647   5
  -2   2   4 1040.13 75.0674   1
   2   2   5 1014.92 60.4458   2
  -2   2   5 792.321 58.5687   3
   2  -2   5 597.427 58.3329   7
  -2  -2   5 797.411 58.7983   3
  -2  -2   5 596.983 58.3711   7
  -2   2   5 955.281 59.9149   1
  -2  -2   5 644.977 58.5509   5
  -2   2   5 1013.92 58.9628   2
  -2   2   5 615.967 56.0797   5
   2  -2   5 605.776 57.5204   5
  -2  -2   5 559.760 55.4007   8
   2   2   5 778.249 59.6522   3
   2   2   5 611.701 56.6908   7
   2  -2   5 280.694 53.3763   4
  -2   2   5 570.647 57.9879   6
  -2  -2   5 603.177 56.4963   4
   2  -2   5 891.995 59.4165   2
   2  -2   5 528.304 54.9516   8
   2   2   5 590.406 55.5831   5
  -2   2   5 621.910 56.2983   7
  -2   2   6 1182.45 112.587   1
   2   2   6 1144.99 113.161   3
   2  -2   6 1302.03 112.822   5
  -2   2   6 1203.10 112.352   3
  -2   2   6 1189.29 111.867   2
   2  -2   6 1221.87 112.821   7
  -2  -2   6 1230.70 112.790   7
  -2   2   6 1293.63 111.385   7
  -2   2   6 1256.38 110.794   5
  -2  -2   6 1270.66 113.069   5
   2  -2   6 968.555 108.811   4
   2   2   6 1273.64 110.882   5
   2   2   6 1131.52 112.691   2
   2  -2   6 1062.60 112.118   2
  -2  -2   6 1155.08 112.193   3
  -2  -2   6 1147.13 110.958   4
   2   2   6 1213.66 111.569   7
  -2   2   7 410.816 38.7227   1
   2  -2   7 312.616 37.8059   5
  -2  -2   7 266.082 34.0405   4
   2  -2   7 308.246 31.1232   4
   2   2   7 349.120 39.2672   3
  -2  -2   7 317.811 38.6534   7
  -2   2   7 286.404 34.7568   5
   2   2   7 301.179 35.8953   7
   2   2   7 399.319 38.8229   2
  -2  -2   7 367.086 37.9286   3
  -2   2   7 369.046 37.9128   3
  -2  -2   7 265.714 37.9340   5
  -2   2   7 222.125 35.1877   7
  -2   2   7 421.313 37.8371   2
   2  -2   7 243.077 36.5201   7
   2   2   7 303.178 34.2885   5
   2   2   8 113.839 22.8812   7
   2  -2   8 62.6257 24.8079   3
  -2   2   8 127.655 26.0056   1
  -2  -2   8 73.4229 18.8706   4
   2   2   8 83.4631 25.8288   3
   2  -2   8 105.626 24.1880   5
  -2  -2   8 67.8925 23.9422   3
  -2   2   8 177.320 25.7372   3
  -2  -2   8 126.515 25.7188   5
   2   2   8 92.0416 24.8236   1
  -2  -2   8 74.4483 24.8411   7
   2   2   8 130.112 20.4192   5
  -2   2   8 81.3024 20.1673   5
   2   2   8 75.4242 24.3105   2
   2  -2   8 117.217 13.5669   4
  -2   2   8 95.0529 22.5037   2
   2  -2   8 103.264 25.6518   7
  -2   2   8 101.465 23.1101   7
  -2  -2   9 356.471 43.5194   4
  -2   2   9 329.658 44.2250   5
  -2   2   9 491.428 50.2128   3
  -2  -2   9 263.316 48.8969   7
  -2   2   9 362.431 46.6824   7
   2   2   9 326.063 44.5645   5
  -2  -2   9 342.631 48.0218   5
   2   2   9 363.051 46.5350   7
  -2   2   9 571.354 52.3383   1
  -2  -2   9 412.753 49.8343   3
  -2   2   9 513.745 48.5514   2
   2   2   9 524.111 51.3507   2
   2  -2   9 404.706 52.8366   3
   2  -2   9 354.638 47.7172   5
   2  -2   9 301.567 49.9922   7
   2   2   9 417.726 52.3026   3
   2  -2  10 86.3993 30.6506   7
   2   2  10 8.28072 29.6473   3
  -2  -2  10 27.8143 28.3746   5
  -2  -2  10 17.2152 27.6079   3
   2   2  10 12.8173 27.7478   2
  -2   2  10 37.3644 21.5040   5
  -2   2  10 62.5605 26.3955   2
  -2   2  10 69.3472 28.2703   3
   2  -2  10 56.9800 27.9117   5
   2  -2  10 37.5669 30.3535   3
  -2   2  10 16.3805 26.2365   7
   2   2  10 68.5609 24.8125   7
  -2  -2  10 104.184 31.3294   7
   2   2  11-9.12117 29.5723   3
   2  -2  11 2.81903 27.4241   7
   2   2  11-2.81264 26.7314   2
  -2  -2  11 49.4981 28.0751   7
   2   2  11-4.82985 25.2241   7
  -2  -2  11-2.49727 24.6685   5
  -2   2  11-16.0652 26.7614   7
   2  -2  11 70.1978 27.8557   5
  -2   2  11 52.5510 28.3023   3
  -2   2  11 34.7308 25.5084   2
  -2  -2  11 38.8108 28.6900   3
   2  -2  11-11.9525 31.4003   3
   2  -2  12 9.86602 31.7954   3
   2   2  12 6.66018 31.1043   3
  -2   2  12-36.7260 30.5602   3
   2   2  12 21.3876 26.5037   7
  -2  -2  12-12.3127 28.1135   3
  -2  -2  12-18.1238 31.0903   7
  -2   2  12-8.20522 26.2410   2
   2  -2  12-52.8847 32.9466   7
   2  -2  12-5.47404 29.4188   5
   2   2  12 3.07286 26.5743   2
  -2  -2  12-10.7380 26.4178   5
  -2   2  12 22.9186 24.8739   7
   2   2  13-3.34205 31.3406   2
   2  -2  13-13.5990 32.9061   7
   2   2  13-21.5719 34.2560   3
  -2   2  13-3.32392 30.4842   3
  -2  -2  13 3.29719 35.1771   7
   2  -2  13-7.17362 36.5293   3
  -2  -2  13-74.2636 36.5389   3
   2  -2  14-7.37472 35.2842   7
   2  -2  14 19.4274 36.7879   3
   2   2  14 23.3147 33.9260   3
  -2  -2  14-39.3318 37.2993   7
  -2   2  14 46.7629 36.4340   3
   2  -2  15 3.92366 38.8897   7
   2  -2  15-33.3944 40.1447   3
   2   2  15 37.4411 38.9581   3
  -2   2  15 19.3324 37.5679   3
  -2  -3 -15 60.1884 40.0376   1
   3  -2 -15 32.9749 34.9543   1
  -2  -3 -15-39.7178 38.8903   6
   2   3 -15 12.9679 36.2879   1
  -3   2 -15 39.6467 36.2183   2
  -3   2 -15 4.84476 41.0818   1
   2   3 -15 23.4135 33.7479   2
  -2  -3 -15-36.5188 36.9528   2
   2   3 -15 4.29876 37.8832   3
   3  -2 -14-19.4454 33.2805   6
  -3   2 -14-49.3619 34.9950   2
   2   3 -14 11.9502 35.4244   1
   3  -2 -14-16.1295 31.1081   2
   3  -2 -14 26.8147 34.7814   1
   2   3 -14-28.5748 36.5213   3
   2   3 -14 40.7611 32.5524   2
  -2  -3 -14-27.2049 33.4615   6
  -2  -3 -14-12.8577 37.1785   1
  -3   2 -14 35.4268 38.0454   1
  -3   2 -13-8.05844 34.1615   1
   3  -2 -13 5.91597 27.5496   2
   3  -2 -13-39.8021 30.8606   6
  -2  -3 -13-3.94239 33.9778   1
   2   3 -13-18.1025 33.1558   1
  -3   2 -13 31.7190 26.8934   6
  -2  -3 -13 31.7594 32.7583   6
  -3   2 -13-27.1081 35.5653   2
   2   3 -13-24.3223 31.5460   2
   3  -2 -13 10.6339 31.9941   1
  -3   2 -12 14.4385 24.6618   6
  -2  -3 -12-5.85751 30.1475   6
   3  -2 -12 48.7900 27.6093   6
   3  -2 -12 7.41738 24.2752   8
   2   3 -12 3.21225 29.0863   2
  -2  -3 -12 3.60383 29.3145   1
  -3   2 -12 28.8576 31.6916   2
   2   3 -12-3.27978 28.9057   1
  -3   2 -12 32.4112 32.3195   1
   3  -2 -12-16.2601 29.0128   1
  -2  -3 -12-11.4057 24.2685   8
  -3   2 -11 26.1172 22.6290   6
  -3   2 -11 42.9592 31.3866   2
   2   3 -11 26.0808 22.4235   6
  -3   2 -11 22.4168 28.2395   1
   2   3 -11 2.94997 27.7995   2
   3  -2 -11 28.1895 25.0612   8
   2   3 -11-20.4786 27.8654   1
   3  -2 -11 44.4640 26.3038   1
   3  -2 -11-37.3450 28.0890   6
  -2  -3 -11 42.4370 28.1573   1
  -2  -3 -11-2.12881 22.7161   8
  -2  -3 -11 2.67863 25.8528   6
   2   3 -10 7.75278 25.6810   1
  -2  -3 -10 20.5213 28.0513   1
  -3   2 -10 27.3887 22.0516   6
   2   3 -10 27.0138 21.1995   6
  -3   2 -10 5.67535 28.1298   1
   3  -2 -10-9.63207 18.8333   4
  -2  -3 -10-3.93274 23.8944   8
  -2  -3 -10 24.3996 25.9525   6
   3  -2 -10 17.6902 23.7195   8
  -3   2 -10 5.97674 29.5509   2
  -3   2 -10-21.1980 17.0542   8
   2   3 -10 10.1751 18.0353   8
   3  -2 -10-4.83239 25.2607   6
   2   3 -10 10.5731 26.9593   2
   2   3  -9 269.211 39.2782   1
   3  -2  -9 252.267 37.4400   8
   3  -2  -9 213.158 37.0449   6
  -2  -3  -9 218.191 39.4849   6
  -3   2  -9 251.136 41.7845   2
   2   3  -9 204.991 37.0663   2
   2   3  -9 239.927 31.1276   8
  -3   2  -9 251.397 30.1689   8
  -3   2  -9 209.949 33.8048   6
  -2  -3  -9 264.115 36.1370   8
   3  -2  -9 217.565 32.2616   4
  -3   2  -9 221.071 39.2085   1
   2   3  -9 294.157 33.7644   6
  -2  -3  -8 529.170 59.3819   8
  -3   2  -8 540.623 58.5175   6
  -2  -3  -8 530.441 53.9089   4
   2   3  -8 724.090 62.6067   2
   2   3  -8 546.379 57.6582   6
  -3   2  -8 513.006 55.4758   8
   3  -2  -8 515.072 60.3363   6
  -3   2  -8 1059.36 66.5871   1
   2   3  -8 946.058 63.8076   1
   2   3  -8 490.424 56.1039   8
   3  -2  -8 515.422 60.5378   8
  -3   2  -8 498.162 52.7488   4
  -2  -3  -8 653.038 61.7839   6
   3  -2  -8 519.868 57.1162   4
  -2  -3  -7 155.034 19.1534   4
  -2  -3  -7 155.577 19.3906   4
  -2  -3  -7 212.589 25.7168   8
   2   3  -7 169.817 26.3056   2
   3  -2  -7 209.121 27.2109   8
   3  -2  -7 215.141 23.8149   4
  -2  -3  -7 214.038 28.1597   6
   2   3  -7 209.722 22.3217   8
   2   3  -7 211.032 26.3557   1
   2   3  -7 181.163 23.2431   6
  -3   2  -7 166.616 17.9901   4
   3  -2  -7 209.213 27.4462   6
  -3   2  -7 149.666 21.1435   8
  -3   2  -7 189.047 24.4484   6
   2   3  -6 61.7391 13.1150   8
  -3   2  -6 60.7980 12.3184   8
  -2  -3  -6 54.6138 20.2403   6
  -3   2  -6 59.0803 8.02535   4
  -3   2  -6 88.2961 15.5669   6
  -2  -3  -6 67.7543 10.4709   4
   3  -2  -6 44.8052 14.8354   4
   2   3  -6 71.2857 14.8889   6
   2   3  -6 104.102 17.8189   1
   2   3  -6 72.9402 18.2773   2
  -2  -3  -6 50.2673 9.94903   4
   3  -2  -6 79.9245 19.0295   8
  -2  -3  -6 70.9126 18.2214   8
  -2  -3  -6 48.9944 10.6333   5
   2   3  -5 2160.40 187.357   2
   2   3  -5 2121.75 185.574   6
   2   3  -5 1992.00 185.239   8
  -3   2  -5 2029.02 186.103   6
  -2  -3  -5 1984.86 186.741   8
  -2  -3  -5 2035.84 184.531   4
   2   3  -5 2052.00 186.648   1
  -3   2  -5 1973.89 184.927   8
  -3   2  -5 1925.20 183.844   4
   3  -2  -5 1911.65 186.087   4
  -2  -3  -5 2027.83 187.386   6
   2   3  -5 2124.97 185.611   6
  -2  -3  -5 2001.88 184.386   5
  -2  -3  -5 1773.55 184.462   4
  -2  -3  -4 1461.41 147.936   5
  -3   2  -4 1415.18 147.662   4
   3  -2  -4 2548.95 150.618   2
   2   3  -4 1553.09 148.896   6
   2   3  -4 1582.60 148.701   6
   3  -2  -4 1606.75 149.924   4
   2   3  -4 1438.53 148.546   8
   2   3  -4 2582.34 151.458   1
  -2  -3  -4 1590.93 150.306   8
  -3   2  -4 1508.72 148.535   8
  -2  -3  -4 1605.19 148.356   4
  -3   2  -4 1596.23 149.746   6
  -2  -3  -4 1505.59 148.795   7
   3  -2  -4 1505.49 149.276   7
   3  -2  -4 1669.29 149.637   5
   2   3  -4 1725.54 151.028   3
   2   3  -4 2207.98 151.187   2
   2   3  -3 10529.9 969.730   4
   3  -2  -3 9859.87 969.148   7
   3  -2  -3 9945.67 969.886   4
   3  -2  -3 10461.8 969.531   5
   2   3  -3 10191.7 969.632   1
  -2  -3  -3 10721.2 968.346   5
   2   3  -3 10931.5 968.783   6
  -2  -3  -3 10503.9 968.918   4
   3  -2  -3 10408.4 969.271   2
   3  -2  -3 10296.3 969.792   1
  -2  -3  -3 10648.2 970.109   8
   3  -2  -3 10399.1 969.754   5
  -3   2  -3 10071.4 970.242   1
   2   3  -3 10028.1 969.905   2
  -3   2  -3 10502.8 968.390   4
   2   3  -3 10457.6 968.930   8
  -3   2  -3 10731.1 969.710   6
  -2  -3  -3 10830.6 969.049   7
   2   3  -3 10058.5 970.234   3
   3  -2  -3 10135.5 969.319   3
  -3   2  -3 10747.7 968.950   8
  -3   2  -2 691.790 56.6160   3
   2   3  -2 778.986 56.6172   2
   3  -2  -2 801.890 55.8398   2
  -3   2  -2 479.121 56.0490   7
  -2  -3  -2 967.181 57.5406   1
  -2  -3  -2 523.980 55.4074   7
  -3   2  -2 781.155 57.6564   2
  -3   2  -2 531.665 55.9647   5
   2   3  -2 481.560 54.7405   6
  -3   2  -2 896.912 57.2289   2
   3  -2  -2 643.970 55.5625   3
   2   3  -2 497.124 55.2741   8
  -2  -3  -2 584.197 55.5939   4
  -3   2  -2 907.132 57.7788   1
   3  -2  -2 566.197 56.0215   5
  -2  -3  -2 501.582 56.5943   6
  -3   2  -2 513.587 55.4039   8
  -3   2  -2 552.018 55.0560   4
   2   3  -2 846.436 56.4732   1
   3  -2  -2 525.780 56.4559   4
   3  -2  -2 912.687 56.7468   1
   2   3  -2 593.185 56.4224   4
   3  -2  -2 471.017 55.2249   7
   3  -2  -2 554.385 56.3942   4
  -3   2  -2 498.803 56.0463   6
   2   3  -1 180452. 16723.6   8
  -2  -3  -1 171647. 16724.0   6
  -2  -3  -1 187329. 16723.9   1
  -3   2  -1 182100. 16723.8   8
  -3   2  -1 182526. 16723.7   3
  -3   2  -1 180306. 16724.1   2
  -2  -3  -1 176704. 16723.8   4
   3  -2  -1 178865. 16723.8   5
  -3   2  -1 180605. 16724.2   1
   3  -2  -1 179644. 16723.6   7
   2   3  -1 178041. 16723.5   1
   3  -2  -1 179126. 16723.2   2
   2   3  -1 181017. 16724.1   7
  -3   2  -1 182431. 16723.6   4
  -2  -3  -1 184184. 16723.6   7
   2   3  -1 178375. 16723.6   2
  -3   2  -1 181541. 16724.1   6
   3  -2  -1 191851. 16723.7   1
   2   3  -1 183130. 16724.3   5
  -2  -3  -1 182661. 16724.1   2
   3  -2  -1 182382. 16724.3   8
  -2  -3  -1 173778. 16724.0   8
  -3   2  -1 185724. 16723.9   7
  -2  -3   0 769.578 48.5766   1
  -3   2   0 622.206 48.5870   2
  -3   2   0 430.254 48.6585   5
  -3   2   0 439.417 48.6975   4
  -2  -3   0 421.565 48.5240   8
   3  -2   0 416.439 48.6763   8
   2   3   0 433.540 48.5602   8
   3  -2   0 421.484 48.4155   7
   3  -2   0 732.670 49.0588   1
  -3   2   0 731.188 49.0774   1
   3  -2   0 643.894 48.7475   2
  -2  -3   0 443.938 48.3111   6
  -2  -3   0 465.863 48.7038   5
  -3   2   0 415.909 48.4671   7
   2   3   0 682.395 49.1348   2
   3  -2   0 428.263 48.7811   6
  -2  -3   0 694.099 48.8742   2
   2   3   0 481.448 48.8814   4
   2   3   0 744.287 48.6490   1
   3  -2   0 466.506 48.7920   4
   2   3   0 397.977 48.3330   6
   2   3   0 445.275 48.7896   5
  -3   2   0 415.580 48.7743   8
  -3   2   1 178111. 16370.8   2
   2   3   1 183408. 16371.1   7
  -2  -3   1 182861. 16371.1   8
  -2  -3   1 178355. 16371.2   2
   3  -2   1 185330. 16371.1   4
   2   3   1 184310. 16371.5   1
  -2  -3   1 176558. 16371.4   3
  -2  -3   1 172192. 16371.5   7
   3  -2   1 182734. 16371.6   2
   3  -2   1 185601. 16371.5   6
  -3   2   1 174197. 16371.1   7
  -2  -3   1 175404. 16371.8   5
   2   3   1 172010. 16371.5   6
  -2  -3   1 170743. 16371.6   4
   2   3   1 189941. 16370.9   5
   3  -2   1 183457. 16371.2   8
   3  -2   1 179881. 16371.6   1
  -3   2   1 179705. 16371.3   5
  -3   2   1 178416. 16371.2   1
  -2  -3   1 177141. 16371.1   1
   2   3   1 144437. 16370.8   5
   3  -2   1 176646. 16371.4   7
   3  -2   1 178250. 16371.2   3
   2   3   1 182069. 16371.2   4
  -3   2   2 899.393 59.3289   2
   2   3   2 573.048 58.7356   4
   3  -2   2 560.281 59.2044   6
   3  -2   2 562.631 58.3541   4
   3  -2   2 557.038 59.4591   5
   3  -2   2 717.019 59.9025   3
  -3   2   2 541.953 59.7042   6
  -3   2   2 969.997 60.6400   1
   2   3   2 532.197 59.7803   8
   3  -2   2 521.906 58.5229   8
  -3   2   2 685.326 58.9135   3
  -2  -3   2 799.137 60.0002   2
  -2  -3   2 516.385 58.6198   8
  -2  -3   2 594.636 59.7827   3
   2   3   2 915.323 60.8429   1
   2   3   2 569.102 60.0224   6
   2   3   2 556.109 58.7133   7
  -3   2   2 478.952 59.8643   8
   3  -2   2 855.897 60.3996   1
  -2  -3   2 589.275 59.7576   4
   2   3   2 633.472 59.9733   3
  -2  -3   2 902.401 59.5787   1
  -3   2   2 537.256 59.4742   5
  -2  -3   3 10655.9 959.111   4
  -3   2   3 10084.3 958.545   2
   2   3   3 10000.5 959.306   3
  -3   2   3 9834.33 959.203   1
   3  -2   3 10625.6 958.786   6
  -2  -3   3 10489.0 959.670   7
   3  -2   3 10104.5 959.105   5
   3  -2   3 9407.32 959.169   3
  -3   2   3 9984.24 958.626   3
  -2  -3   3 10403.2 958.334   8
   2   3   3 10377.1 958.395   7
   3  -2   3 10855.8 958.146   8
  -2  -3   3 10220.6 959.030   2
  -2  -3   3 10932.9 959.873   5
   3  -2   3 9839.26 959.208   7
  -3   2   3 12172.5 958.673   7
   2   3   3 10157.6 958.035   4
  -2  -3   3 10320.4 958.734   1
   2   3   3 9820.52 959.462   1
  -3   2   3 10718.3 959.475   6
  -3   2   3 9904.71 959.396   8
  -3   2   4 1460.69 160.458   8
   3  -2   4 1616.01 160.686   7
  -3   2   4 1646.18 160.822   6
  -2  -3   4 1456.77 159.021   8
   3  -2   4 1578.38 160.358   5
   2   3   4 1582.65 158.716   4
   2   3   4 2735.31 162.946   2
  -2  -3   4 1646.75 160.152   4
  -3   2   4 2026.65 160.570   3
  -2  -3   4 1667.92 161.335   5
   2   3   4 1855.06 161.282   3
  -2  -3   4 1707.71 161.226   7
   2   3   4 1457.93 158.544   5
  -3   2   4 1718.50 159.908   5
  -3   2   4 2649.93 161.051   2
   2   3   4 1592.40 159.558   7
   3  -2   4 1476.81 158.968   8
  -3   2   4 1687.99 159.736   7
  -3   2   4 2813.99 162.512   1
   3  -2   4 2013.36 161.610   3
  -3   2   5 2131.30 199.931   2
  -2  -3   5 2064.78 199.794   4
  -2  -3   5 2115.10 200.626   3
   3  -2   5 2069.45 200.806   7
  -2  -3   5 2286.16 201.331   7
   2   3   5 1906.20 200.754   3
  -3   2   5 2205.47 200.929   6
  -3   2   5 2296.76 199.768   5
   2   3   5 2100.87 201.141   2
   3  -2   5 1922.30 200.438   2
  -3   2   5 2462.99 200.001   7
  -2  -3   5 2107.86 198.767   8
   3  -2   5 2028.07 198.857   8
  -3   2   5 2172.99 200.194   3
  -3   2   5 2169.33 200.959   1
   3  -2   5 2108.37 200.359   5
   3  -2   5 1904.51 200.632   3
  -2  -3   5 2300.67 201.489   5
  -3   2   5 2052.11 200.374   8
   2   3   5 2217.64 198.754   5
   2   3   5 2119.02 199.547   7
   2   3   6 84.7601 19.7365   3
  -3   2   6 52.5161 17.8912   6
   3  -2   6 89.6422 17.6417   5
  -2  -3   6 77.6579 18.8327   3
  -3   2   6 87.6195 17.7282   3
  -2  -3   6 67.1011 20.8207   7
   2   3   6 64.5480 13.3483   5
  -2  -3   6 80.0747 20.5604   5
  -3   2   6 39.7468 15.3235   5
  -3   2   6 47.1970 15.1884   2
  -2  -3   6 50.7964 14.4412   4
  -3   2   6 66.4463 15.7959   7
   2   3   6 21.9937 14.7102   7
   3  -2   6 88.0721 19.7508   2
  -3   2   6 97.8839 19.2146   1
   2   3   6 106.275 19.3488   2
   3  -2   6 51.0222 18.2600   7
   3  -2   7 217.717 29.3612   5
  -3   2   7 208.919 26.4820   5
   2   3   7 205.514 30.2764   3
   2   3   7 214.687 29.9388   2
  -3   2   7 231.783 27.3246   2
  -3   2   7 206.727 28.4569   3
  -3   2   7 231.790 27.9559   7
  -2  -3   7 189.550 29.4480   3
  -2  -3   7 206.641 30.9609   5
  -2  -3   7 288.490 31.7020   7
   3  -2   7 188.239 29.2703   7
  -3   2   7 186.718 29.2654   1
  -2  -3   7 169.948 25.1209   4
   3  -2   7 193.354 29.0882   2
   2   3   7 285.169 25.6790   5
   2   3   7 192.278 26.7087   7
   2   3   8 1029.66 73.1159   1
   2   3   8 737.815 71.5483   3
  -2  -3   8 820.348 70.3233   3
  -2  -3   8 522.006 65.1039   4
  -2  -3   8 561.609 69.6177   7
  -3   2   8 970.959 69.4136   2
   2   3   8 551.381 64.7913   5
  -3   2   8 433.348 65.7151   7
  -3   2   8 915.597 71.0818   1
   2   3   8 599.261 66.8407   7
   3  -2   8 567.683 69.2939   7
  -3   2   8 717.605 68.7699   3
   3  -2   8 597.822 68.1972   5
  -3   2   8 514.339 65.7855   5
  -2  -3   8 615.333 69.7946   5
   2   3   8 921.578 71.8077   2
   2   3   9 185.524 29.1172   5
  -3   2   9 241.873 34.5727   7
   3  -2   9 167.275 35.5130   5
   2   3   9 169.010 38.2057   1
   2   3   9 262.882 39.4729   3
  -2  -3   9 218.880 37.6704   5
   3  -2   9 213.391 38.2396   7
   2   3   9 244.634 34.2409   7
  -2  -3   9 258.128 38.1528   3
  -2  -3   9 141.190 36.9496   7
   2   3   9 219.644 36.8078   2
  -3   2   9 231.898 35.1294   3
  -3   2   9 228.397 31.2484   5
  -2  -3   9 220.799 30.6507   4
  -3   2   9 254.028 34.1780   2
  -3   2   9 260.933 37.9470   1
  -3   2  10-10.1928 26.1365   7
  -3   2  10-7.83630 26.2046   1
  -3   2  10 43.7064 20.9283   5
   2   3  10-4.09349 21.4891   7
   2   3  10 41.7209 28.6242   3
   3  -2  10-40.7482 26.2704   5
   3  -2  10-17.9187 27.6809   7
  -3   2  10-21.5489 23.5402   2
  -2  -3  10-9.89294 27.0715   5
   3  -2  10-10.9489 30.6127   3
  -2  -3  10 2.48626 27.1050   3
  -2  -3  10-18.1091 28.5986   7
   2   3  10-13.0606 24.9914   2
  -3   2  10 24.1010 27.4660   3
  -2  -3  11 2.86055 29.7315   7
   3  -2  11 9.93564 25.9962   5
   3  -2  11 21.3305 27.8557   3
   2   3  11-16.1675 23.8042   7
  -3   2  11 4.59065 24.8033   7
  -2  -3  11 61.0988 29.1221   3
   2   3  11 22.9352 26.1358   2
  -2  -3  11 18.7432 26.5061   5
   2   3  11 45.9119 30.1422   3
  -3   2  11 11.9265 23.5044   2
   3  -2  11 11.4488 27.5566   7
  -3   2  11 2.70083 26.6045   3
   3  -2  12-16.7757 31.2476   3
  -3   2  12-27.3934 28.5883   7
  -2  -3  12-15.6858 31.8435   7
  -3   2  12 5.93408 28.1625   3
   3  -2  12 9.42849 30.6140   7
  -2  -3  12-5.69694 28.2330   5
   2   3  12-10.0472 31.0182   3
  -3   2  12-2.64822 25.6002   2
   2   3  12 5.11776 25.6092   7
   2   3  12 31.1138 29.2959   2
   3  -2  13 20.6042 34.1196   7
   2   3  13-7.21742 33.9784   3
   3  -2  13-3.65601 34.5166   3
  -3   2  13-3.24437 31.1206   3
   2   3  13-3.36746 29.8534   2
  -2  -3  13 17.0958 34.1363   7
  -2  -3  14-74.0905 39.8518   7
   2   3  14-7.78483 33.7031   3
  -3   2  14-59.9262 35.7431   3
   3  -2  14-19.7267 35.6557   3
   2   3  14 10.8796 33.3540   2
   3  -2  14 40.8711 35.3129   7
  -2  -3  15 30.9661 38.8803   7
   3  -2  15-12.6955 38.2467   3
  -3   2  15 3.79500 33.7013   3
   2   3  15 41.6993 37.6889   3
   3  -2  15 51.8616 39.2026   7
  -3   1 -15 21.4687 37.5970   2
  -3   1 -15-4.80097 38.4715   1
   1   3 -15-17.2925 35.4095   3
   1   3 -15-32.0511 37.4151   2
   1   3 -15 8.88753 37.6751   1
  -1  -3 -15 32.2822 35.4645   6
   3  -1 -15 4.09114 35.3725   1
  -1  -3 -15 3.92471 34.7927   2
  -1  -3 -15-27.2784 38.2874   1
  -1  -3 -14 42.1492 35.8671   1
  -3   1 -14-23.8829 30.9455   6
   3  -1 -14-9.83414 28.6303   2
   1   3 -14-41.0992 34.3908   1
   3  -1 -14-9.41415 32.2351   6
   3  -1 -14-11.4289 33.9920   1
  -3   1 -14-17.5227 36.5290   1
  -1  -3 -14-20.3418 33.8617   6
   1   3 -14-22.7818 34.2843   2
  -3   1 -14 24.5929 37.7613   2
   3  -1 -13 6.05338 29.2580   2
   3  -1 -13-3.50198 31.4215   1
  -3   1 -13 47.6098 36.4359   1
   3  -1 -13-2.95518 29.8561   6
  -3   1 -13 5.48329 28.1502   6
  -3   1 -13 3.81701 34.6533   2
   1   3 -13-3.73786 30.0642   1
   1   3 -13-17.7471 32.4109   2
  -1  -3 -13-19.4188 36.5676   1
  -1  -3 -13-22.1334 31.4915   6
  -3   1 -12 75.0871 24.8791   6
  -3   1 -12 42.8074 31.4395   1
  -1  -3 -12 9.31667 25.3512   8
   1   3 -12-42.8866 30.7329   2
   1   3 -12-3.35359 29.4660   1
   3  -1 -12 2.33113 22.6620   8
  -1  -3 -12-23.4267 28.4619   6
   3  -1 -12 33.1286 26.7657   2
   3  -1 -12-12.8190 29.8558   1
  -3   1 -12 7.02823 30.0991   2
   3  -1 -12 38.7044 27.0076   6
  -1  -3 -12-35.5694 33.6792   1
  -1  -3 -11-41.4415 24.7770   8
  -3   1 -11-38.4633 30.1902   2
   3  -1 -11-2.21018 21.9211   8
   3  -1 -11-14.5339 27.7481   1
   1   3 -11-11.9561 28.5324   1
  -1  -3 -11 5.39144 26.7307   6
   1   3 -11 17.9884 27.7786   2
  -3   1 -11 9.56579 30.4360   1
   1   3 -11-1.99851 21.6698   6
  -3   1 -11-6.80495 24.4909   6
  -1  -3 -11-22.6327 29.0215   1
   3  -1 -11 7.68275 25.9462   6
   1   3 -10 139.869 31.8041   1
   1   3 -10 65.7203 31.1977   2
   3  -1 -10 88.8817 28.8641   1
   1   3 -10 37.3033 22.1581   6
  -1  -3 -10 76.1460 29.4374   6
  -1  -3 -10 89.9398 25.3706   8
   3  -1 -10 65.3849 27.1370   6
  -3   1 -10 92.1103 20.3591   8
  -3   1 -10 92.7915 30.9637   1
   3  -1 -10 69.5121 21.0111   4
  -3   1 -10 92.0079 25.4948   6
   3  -1 -10 107.903 26.7823   8
   3  -1  -9 16.7776 24.9807   6
  -1  -3  -9 35.6415 24.5047   8
  -3   1  -9 2.50929 16.9804   8
   1   3  -9 4.69626 20.6222   6
   3  -1  -9-7.71242 23.8425   8
   1   3  -9 12.2249 27.8140   2
  -3   1  -9 21.8117 23.5434   6
   3  -1  -9-16.5527 19.3810   4
  -1  -3  -9-2.22437 26.2252   6
   1   3  -9 18.4836 17.5282   8
  -3   1  -9 14.8113 26.5865   1
  -1  -3  -9-5.90738 13.3157   4
   1   3  -9 2.31162 25.8554   1
   3  -1  -8 488.405 49.8312   6
  -3   1  -8 380.166 41.3620   4
   3  -1  -8 428.262 48.5705   8
   1   3  -8 448.806 51.0752   2
  -3   1  -8 477.466 45.7837   8
  -1  -3  -8 415.706 43.3058   4
  -1  -3  -8 432.676 48.7313   8
  -1  -3  -8 512.255 50.9177   6
  -3   1  -8 423.853 47.4842   6
   1   3  -8 493.352 45.2437   8
   1   3  -8 509.424 46.4895   6
   3  -1  -8 452.460 46.4326   4
   1   3  -8 427.616 50.1340   1
  -1  -3  -7 165.905 28.6814   6
   3  -1  -7 129.526 25.0294   8
  -1  -3  -7 175.081 20.9949   4
  -3   1  -7 177.031 18.6404   4
   3  -1  -7 149.112 26.9262   6
  -3   1  -7 199.164 23.1649   8
   1   3  -7 212.003 24.1279   6
   1   3  -7 176.588 22.4837   8
  -3   1  -7 184.889 18.5470   4
  -3   1  -7 170.184 25.6264   6
  -1  -3  -7 187.921 26.0500   8
   1   3  -7 276.405 30.2954   2
  -1  -3  -6 64.3721 16.7459   8
   1   3  -6 32.5341 16.1587   1
  -1  -3  -6 34.1933 9.74145   4
  -1  -3  -6 41.5102 17.4391   6
  -3   1  -6 30.7391 6.20956   4
  -3   1  -6 32.7020 14.8567   6
  -3   1  -6 49.0427 12.0706   8
   1   3  -6 30.1166 11.5259   8
  -1  -3  -6 52.9110 10.6364   5
   1   3  -6 68.7822 18.8675   2
   1   3  -6 9.51354 12.4867   6
  -3   1  -6 49.4287 6.23720   4
  -1  -3  -5 727.293 75.0174   8
   1   3  -5 795.984 72.9420   8
  -3   1  -5 766.165 73.2786   8
   1   3  -5 770.406 72.9024   8
  -1  -3  -5 817.700 72.5732   4
   1   3  -5 1120.17 77.2722   2
  -1  -3  -5 767.356 72.3539   5
  -1  -3  -5 705.174 72.4547   4
  -3   1  -5 686.003 71.0642   4
  -1  -3  -5 772.348 76.0967   6
   1   3  -5 770.654 73.3210   6
  -3   1  -5 791.353 74.7154   6
   1   3  -4 787.059 75.7382   1
  -1  -3  -4 798.522 73.7345   5
  -1  -3  -4 752.165 76.0046   8
   3  -1  -4 709.353 74.8138   2
  -3   1  -4 781.402 75.5236   6
   1   3  -4 852.931 74.6054   6
  -3   1  -4 744.160 76.2259   1
  -3   1  -4 755.172 74.5366   8
  -1  -3  -4 723.898 74.0366   4
   1   3  -4 876.414 74.7936   6
   1   3  -4 845.886 76.3945   2
   1   3  -4 828.867 74.2039   8
   1   3  -4 946.649 75.1352   4
  -1  -3  -4 672.472 74.1125   7
  -1  -3  -3 18.3862 3.81839   5
   3  -1  -3 23.0181 7.68628   4
   1   3  -3 18.5598 5.57023   6
   3  -1  -3 21.7527 7.86515   5
  -1  -3  -3 28.0457 5.25011   4
   3  -1  -3 17.2609 8.62599   8
  -3   1  -3 24.7209 5.95788   8
  -3   1  -3 35.6055 8.40204   1
   1   3  -3 40.0120 7.62428   1
   1   3  -3 49.0920 8.82959   2
   3  -1  -3 49.3453 6.64921   2
   3  -1  -3 32.7263 7.52929   7
  -1  -3  -3 35.9048 9.52732   8
   3  -1  -3 50.7993 8.12794   1
  -1  -3  -3 26.5558 5.12643   7
   1   3  -3 28.1604 4.88548   8
   1   3  -3 29.0986 5.62244   6
   3  -1  -3 20.2184 7.81855   6
   3  -1  -3 22.1879 7.19111   3
  -3   1  -3 21.4494 8.10493   6
  -3   1  -3 20.7374 6.44651   5
   1   3  -3 37.9729 7.00419   4
  -3   1  -2 3015.23 278.646   5
  -1  -3  -2 2928.03 278.096   7
  -1  -3  -2 2935.81 278.513   4
  -1  -3  -2 2942.58 279.324   6
  -3   1  -2 2921.20 278.946   6
  -3   1  -2 2935.80 279.183   1
   3  -1  -2 3132.54 278.292   2
   1   3  -2 3414.36 279.028   4
  -1  -3  -2 3127.54 279.268   1
   3  -1  -2 2978.79 279.242   8
   3  -1  -2 3079.91 278.769   1
  -3   1  -2 2972.47 279.078   2
  -3   1  -2 2940.42 278.497   8
   3  -1  -2 3083.37 278.827   6
   1   3  -2 2950.51 278.999   1
   3  -1  -2 3109.19 278.993   5
   3  -1  -2 3118.43 279.247   5
  -1  -3  -2 2942.75 279.282   6
   1   3  -2 2964.60 279.145   2
   1   3  -2 2987.38 279.255   7
  -1  -3  -2 2903.41 278.883   3
   3  -1  -2 2875.30 278.445   7
  -3   1  -2 2980.95 279.061   3
   3  -1  -2 2906.68 278.452   3
   1   3  -2 3016.68 278.019   8
   3  -1  -2 3057.05 279.213   4
   3  -1  -1 1129.35 125.724   5
   1   3  -1 1762.91 125.998   2
   1   3  -1 1116.48 125.048   8
   1   3  -1 1173.17 125.886   5
  -1  -3  -1 1170.19 125.856   8
   1   3  -1 1099.90 125.759   7
  -3   1  -1 2009.39 126.208   2
  -1  -3  -1 1131.01 125.792   6
   1   3  -1 1992.67 126.055   1
  -1  -3  -1 1188.91 125.846   6
  -3   1  -1 1133.18 125.531   8
  -3   1  -1 1999.48 126.494   1
   3  -1  -1 1128.78 125.504   7
  -3   1  -1 1527.37 125.740   3
  -3   1  -1 1122.02 125.512   7
  -1  -3  -1 1246.23 125.655   4
   3  -1  -1 2074.11 125.675   1
  -1  -3  -1 2090.64 126.361   1
  -1  -3  -1 1162.39 125.101   7
  -3   1   0 19300.7 1816.49   2
  -3   1   0 19816.7 1816.76   7
   1   3   0 19574.9 1816.62   7
   3  -1   0 18914.9 1816.58   1
  -1  -3   0 19435.3 1816.65   2
   3  -1   0 20282.3 1816.98   8
  -1  -3   0 19591.1 1816.54   1
   1   3   0 19331.0 1816.83   4
   1   3   0 18572.2 1816.84   3
  -3   1   0 19386.9 1816.53   1
  -1  -3   0 19638.7 1816.53   6
  -1  -3   0 19965.2 1816.55   6
  -1  -3   0 19892.2 1816.69   8
   3  -1   0 19485.4 1816.75   7
   1   3   0 19377.8 1816.69   8
   1   3   0 20638.5 1816.65   1
  -3   1   0 20561.0 1817.05   4
   3  -1   0 20660.3 1817.02   4
   3  -1   0 19647.0 1816.46   2
  -1  -3   0 19324.0 1816.76   5
   1   3   0 20000.7 1816.73   5
  -3   1   1 1102.18 124.074   7
   1   3   1 2096.41 125.278   1
   1   3   1 1164.24 123.701   7
   1   3   1 1460.21 124.883   3
  -1  -3   1 1217.54 124.576   7
   3  -1   1 1194.38 124.143   5
   3  -1   1 1891.20 124.893   1
   3  -1   1 1115.22 124.041   8
   3  -1   1 1937.19 124.803   2
   3  -1   1 1171.24 124.337   6
  -1  -3   1 1074.57 123.640   8
   3  -1   1 1561.64 124.376   3
  -1  -3   1 1213.21 124.434   4
  -3   1   1 1181.28 124.421   5
  -3   1   1 1954.99 124.370   1
   1   3   1 1254.17 124.178   4
  -1  -3   1 1941.12 124.698   1
  -3   1   1 1089.32 124.170   6
   3  -1   1 1329.03 123.973   4
   3  -1   1 1231.53 123.858   4
  -1  -3   1 1707.61 124.645   2
   3  -1   2 2951.94 278.129   1
  -1  -3   2 2973.16 278.241   2
   3  -1   2 2942.32 277.489   8
  -1  -3   2 3077.56 278.084   4
   3  -1   2 2808.78 278.117   2
  -3   1   2 3153.53 278.054   1
   3  -1   2 2976.77 277.937   6
   1   3   2 2941.43 277.509   4
  -3   1   2 3138.31 277.590   3
   1   3   2 2880.76 278.343   2
  -3   1   2 3116.62 277.398   2
  -1  -3   2 2940.59 277.888   1
  -3   1   2 2902.26 278.417   8
   1   3   2 2917.00 277.240   7
   3  -1   2 3033.86 278.265   3
  -3   1   2 3116.12 278.579   4
   1   3   2 2960.10 278.130   3
  -3   1   2 3064.80 278.117   6
   3  -1   2 2958.52 277.846   5
  -3   1   3 18.8602 8.41103   6
  -3   1   3 36.6165 8.13852   1
  -1  -3   3 20.1580 7.31036   4
  -1  -3   3 36.4452 8.68552   2
   1   3   3 44.2938 10.0866   2
  -3   1   3 30.2174 9.23343   4
  -3   1   3 40.0067 7.35293   3
  -1  -3   3 23.4745 10.9828   5
  -1  -3   3 26.6976 4.57120   8
  -3   1   3 18.2635 8.77786   8
   3  -1   3 24.4170 6.43614   8
   1   3   3 34.5869 8.97510   3
  -3   1   3 45.7906 6.48770   2
  -3   1   3 29.0428 8.17143   7
   3  -1   3 36.1122 9.82418   3
  -1  -3   3 30.5965 7.24654   1
   3  -1   3 25.4276 8.83044   7
   3  -1   3 34.0074 7.81771   5
  -3   1   3 23.5223 8.25855   5
   3  -1   3 11.5557 8.14848   6
   1   3   3 17.9636 5.74116   4
   1   3   3 32.3709 6.35783   7
  -1  -3   4 747.835 68.3790   8
   3  -1   4 730.510 69.9357   5
  -3   1   4 733.132 69.4550   2
  -3   1   4 893.792 70.9217   1
  -3   1   4 624.843 69.4563   3
  -3   1   4 742.314 69.9224   7
  -1  -3   4 814.916 71.4940   5
  -1  -3   4 792.967 69.5511   4
  -3   1   4 756.183 70.1787   8
  -1  -3   4 701.506 70.4161   3
  -3   1   4 688.350 70.3432   4
   3  -1   4 747.683 69.1266   8
   1   3   4 659.227 68.1348   5
   1   3   4 673.419 68.9538   7
   1   3   4 616.087 68.4562   4
  -3   1   4 705.602 69.6711   5
   1   3   4 591.448 70.0767   2
   1   3   4 646.216 70.2420   3
  -1  -3   4 798.214 71.2141   7
   3  -1   4 728.614 70.4524   7
   3  -1   4 665.370 70.5337   3
  -3   1   5 840.082 93.7713   6
  -3   1   5 908.904 93.0951   7
  -1  -3   5 1045.94 94.5627   3
   3  -1   5 853.342 93.7730   7
   1   3   5 1055.22 94.8333   3
  -1  -3   5 880.545 92.4636   4
  -3   1   5 1089.53 93.6816   3
  -3   1   5 1465.15 95.7807   1
   1   3   5 868.642 91.5317   5
   3  -1   5 1435.15 95.8612   2
  -3   1   5 859.098 92.8186   5
   3  -1   5 838.658 93.1413   5
   1   3   5 784.016 92.1795   7
  -1  -3   5 800.520 94.0479   7
  -3   1   5 903.928 93.6389   4
  -3   1   5 1454.31 94.0201   2
  -3   1   5 864.671 93.2285   8
  -1  -3   5 983.581 95.0059   5
   1   3   5 1392.64 95.9986   2
   3  -1   6 50.5363 16.4236   5
  -3   1   6 53.3291 16.2190   1
   3  -1   6 58.6463 17.9479   2
  -1  -3   6 23.3826 19.4455   5
  -3   1   6 89.3632 16.3652   4
  -3   1   6 47.7674 14.3008   5
  -3   1   6 31.3045 16.8856   6
   1   3   6 62.3503 12.6944   5
  -1  -3   6 55.4068 19.6528   7
  -3   1   6 68.9175 16.8591   3
   1   3   6 59.6927 17.5863   2
   1   3   6 83.8854 19.6428   1
  -1  -3   6 37.2749 13.2348   4
   1   3   6 55.3385 18.2866   3
  -3   1   6 47.7836 14.3435   2
  -1  -3   6 65.2643 17.6246   3
   1   3   6 34.9717 13.5836   7
   3  -1   6 45.8857 17.5191   7
  -3   1   6 60.0020 17.4446   7
  -1  -3   7 201.026 27.3583   4
  -1  -3   7 288.343 32.7050   3
   1   3   7 332.265 32.6916   2
   1   3   7 202.570 27.5115   5
   3  -1   7 219.517 32.3255   7
  -3   1   7 396.912 33.8750   1
  -3   1   7 223.111 31.1790   7
  -1  -3   7 227.076 32.4686   5
  -3   1   7 275.645 31.6235   3
   1   3   7 195.592 29.1600   7
   3  -1   7 295.207 33.1845   2
   1   3   7 324.727 33.8580   1
  -1  -3   7 222.824 33.2759   7
  -3   1   7 208.195 29.6708   5
   1   3   7 221.134 32.7438   3
  -3   1   7 380.804 31.2541   2
   3  -1   7 157.508 30.2859   5
  -1  -3   8 461.265 52.7848   3
   3  -1   8 409.391 51.2165   2
  -3   1   8 495.429 50.1938   2
   1   3   8 446.742 53.3414   3
   1   3   8 437.931 53.2977   1
  -1  -3   8 533.234 53.2370   7
   3  -1   8 397.136 50.5489   5
  -3   1   8 483.140 50.8816   7
  -3   1   8 471.892 51.5606   3
   1   3   8 489.757 50.0885   7
  -3   1   8 444.659 49.4995   5
  -1  -3   8 511.004 52.8857   5
   1   3   8 453.177 47.4455   5
  -1  -3   8 436.246 47.3489   4
   3  -1   8 433.592 52.0924   7
   1   3   8 465.351 52.2199   2
  -3   1   8 440.268 51.3777   1
   1   3   9 6.51815 18.3306   5
  -3   1   9-1.69397 21.1190   5
   1   3   9 24.8695 28.5574   1
  -3   1   9-29.8283 23.3828   2
   1   3   9-9.05462 24.9343   2
   3  -1   9-9.83860 29.5484   3
   3  -1   9 13.3926 22.7197   5
   1   3   9-8.86167 23.5460   7
  -1  -3   9-26.0712 18.1735   4
   1   3   9-2.43166 27.7192   3
  -3   1   9-44.4415 26.9420   3
  -1  -3   9 26.6548 26.9504   3
   3  -1   9-37.2519 27.6064   7
  -1  -3   9 13.9246 27.3671   7
   3  -1   9 9.06603 26.2162   2
  -1  -3   9-9.15875 27.2324   5
  -3   1   9-18.9772 25.0042   7
  -3   1  10 57.5981 28.5612   3
   1   3  10 70.9798 28.7930   2
  -1  -3  10 46.8723 28.7944   7
  -3   1  10 96.7211 29.0469   7
  -3   1  10 77.5126 23.5698   5
   1   3  10 122.066 31.1763   3
   3  -1  10 91.4407 28.5897   7
   1   3  10 76.9117 25.7861   7
  -1  -3  10 171.243 31.6359   5
   3  -1  10 118.049 31.7000   3
   3  -1  10 100.011 27.8978   5
  -3   1  10 67.4642 26.5612   2
  -1  -3  10 47.9816 29.7377   3
  -1  -3  11-5.76617 29.3475   7
   1   3  11-22.1577 26.8593   2
   1   3  11 31.7364 23.1891   7
  -3   1  11 77.2197 27.6674   7
  -3   1  11-16.0988 26.1530   3
   3  -1  11-24.9048 28.1039   7
   3  -1  11-7.00010 24.4084   5
  -1  -3  11-28.2727 28.2425   3
   1   3  11-11.9958 29.0796   3
  -3   1  11-33.1896 24.1752   5
   3  -1  11-67.0417 31.0895   3
  -1  -3  11-8.05133 26.4218   5
  -3   1  12 5.93226 28.7678   3
  -3   1  12-88.2583 29.7013   7
   1   3  12-27.2548 27.6751   2
  -1  -3  12 37.0900 29.2491   5
   3  -1  12-3.35475 32.8614   3
   1   3  12-16.3747 29.8395   3
   3  -1  12 42.5423 30.1390   7
  -1  -3  12-34.6831 32.8314   3
   1   3  12 35.3614 26.5407   7
  -1  -3  12-53.6662 33.3759   7
  -1  -3  13-6.91437 34.0269   3
   3  -1  13-7.31282 34.9934   3
  -3   1  13-19.5362 31.0011   3
   1   3  13-35.4827 36.2784   3
  -1  -3  13 30.8147 35.1674   7
   1   3  13-35.9029 30.9113   2
   3  -1  13 19.9330 32.6181   7
   1   3  14 3.81936 35.0761   3
  -3   1  14-21.2597 35.4603   3
  -1  -3  14-3.69783 36.1108   7
   3  -1  14-17.9790 36.9206   7
   1   3  14-31.8212 32.9290   2
   3  -1  14 82.8612 39.0130   3
  -1  -3  15-39.6765 41.3313   7
  -3   1  15 30.4745 35.6225   3
   1   3  15-32.7300 39.0819   3
   3  -1  15-41.9258 39.6248   3
   0  -3 -15-49.0289 39.1497   1
   3   0 -15-41.0503 34.8032   1
  -3   0 -15-14.2622 41.4973   1
   0   3 -15 17.3632 36.6793   3
   0   3 -15 36.8160 36.8770   1
   0  -3 -15-3.56753 33.3166   6
   0  -3 -15 7.59492 31.6545   2
   0   3 -15-4.12613 34.3941   2
  -3   0 -15 47.3135 34.0789   2
   0  -3 -14 28.9611 34.2680   1
  -3   0 -14-16.1130 35.1809   2
   0   3 -14-4.20928 35.9428   1
   0   3 -14 3.90583 34.2199   2
   3   0 -14-19.9294 28.1846   2
  -3   0 -14 13.0724 37.4505   1
   0  -3 -14-47.1523 35.1463   6
  -3   0 -14-21.6224 29.9582   6
   3   0 -14-34.0819 35.3839   1
   0  -3 -13-3.15590 29.8998   6
  -3   0 -13-2.84688 30.2997   6
   3   0 -13 43.4699 28.2977   2
  -3   0 -13 43.5595 35.3397   1
   3   0 -13 17.0768 28.3046   6
   0   3 -13 7.29727 30.9581   2
   0  -3 -13 3.82149 31.4362   1
   3   0 -13 27.8936 32.4055   1
  -3   0 -13-3.73196 33.1066   2
   0   3 -13 3.82183 31.2156   1
   0  -3 -12 23.5141 29.1347   6
   0  -3 -12-24.5115 30.7592   1
   3   0 -12 15.8912 26.0607   6
   0   3 -12 37.6901 31.3793   1
   0  -3 -12-4.79635 26.4608   8
   0   3 -12 22.1781 23.1852   6
  -3   0 -12-24.9239 34.1549   1
   3   0 -12 6.33944 28.4428   1
  -3   0 -12 2.60511 25.4425   6
   0   3 -12-20.1363 31.2577   2
   3   0 -12 5.70328 25.7410   2
   0   3 -11 13.9836 21.5926   6
   3   0 -11 25.7513 25.3183   1
  -3   0 -11 37.9212 23.0615   6
   3   0 -11 10.3470 25.1639   2
   3   0 -11-34.2263 25.9178   6
   0   3 -11 18.2989 28.3521   1
   0  -3 -11 18.1382 23.7835   8
  -3   0 -11 31.7572 20.6056   8
   0  -3 -11-27.1159 26.7072   6
   0  -3 -11 22.2883 31.1957   1
  -3   0 -11 25.4940 29.1256   1
   3   0 -11 24.8862 22.3675   8
   0   3 -11 3.10442 29.1771   2
   0   3 -10 19.6978 28.5302   2
   0   3 -10-8.91122 21.8719   6
   0   3 -10 37.8229 28.3355   1
  -3   0 -10 36.8224 18.6919   8
  -3   0 -10 2.14027 23.1378   6
   0  -3 -10-7.45875 27.6800   6
   3   0 -10 4.95727 19.1576   4
   3   0 -10 31.0735 23.1721   8
   3   0 -10 13.4060 24.2006   6
   3   0 -10 30.7582 25.6280   1
   0  -3 -10-6.36821 24.4522   8
  -3   0 -10 36.6182 27.1948   1
   3   0  -9 95.3453 24.9642   6
   0  -3  -9 27.7824 14.8035   4
   0   3  -9 44.8400 25.4129   1
   0   3  -9 40.6430 17.1825   8
  -3   0  -9 30.4768 19.0722   8
   3   0  -9 55.7314 22.6367   8
   3   0  -9 32.2452 18.7568   4
   0  -3  -9 6.77667 27.5024   6
   0   3  -9 40.6560 19.9024   6
  -3   0  -9-7.67046 22.7232   6
   3   0  -9 56.7473 26.3071   1
   0  -3  -9 29.3889 25.1102   8
   0   3  -9 15.2166 27.8383   2
  -3   0  -8 189.260 24.7493   8
   0  -3  -8 179.121 21.7519   4
  -3   0  -8 152.634 17.7493   4
   0   3  -8 238.881 32.1166   2
   3   0  -8 156.444 26.4909   8
   0   3  -8 182.312 25.8193   6
   0   3  -8 286.213 31.9796   1
   0   3  -8 169.458 22.5725   8
   0  -3  -8 245.265 30.6729   6
   3   0  -8 175.023 28.2544   6
  -3   0  -8 183.073 27.7462   6
   0  -3  -8 161.988 27.4896   8
   0   3  -7 160.790 22.4815   6
   3   0  -7 221.033 26.4525   6
   0  -3  -7 230.329 27.1524   8
   0   3  -7 195.617 25.8267   1
  -3   0  -7 215.385 23.4189   8
   3   0  -7 146.917 23.8795   8
   0   3  -7 214.381 28.8663   2
  -3   0  -7 204.646 25.8697   6
   0   3  -7 202.530 21.7864   8
  -3   0  -7 175.879 18.3403   4
   0  -3  -7 186.469 21.3512   4
   0  -3  -7 240.836 28.2984   6
  -3   0  -7 173.164 18.2664   4
   0   3  -6 834.128 80.3726   6
   0  -3  -6 946.144 82.9430   8
   0  -3  -6 1017.55 84.4511   6
   0  -3  -6 847.260 79.6773   5
   0  -3  -6 879.620 79.8313   4
  -3   0  -6 758.966 77.7328   4
  -3   0  -6 854.603 80.9687   8
  -3   0  -6 834.320 82.3452   6
   0   3  -6 854.279 79.9191   8
   0   3  -6 1205.77 85.6757   2
  -3   0  -6 784.410 77.7762   4
   0   3  -6 808.826 79.5397   8
   0   3  -5 9107.50 808.806   8
   0  -3  -5 8925.43 808.683   5
   0  -3  -5 8758.02 808.962   4
  -3   0  -5 9122.34 809.469   8
   0   3  -5 8967.56 811.165   2
   0   3  -5 9055.49 810.702   1
  -3   0  -5 8776.79 810.283   6
   0  -3  -5 7823.85 808.783   4
   0  -3  -5 8929.50 810.640   8
   0   3  -5 8443.65 808.860   4
   0  -3  -5 9360.51 811.137   6
  -3   0  -5 8618.76 810.793   1
   0   3  -5 8567.69 809.197   6
   0   3  -5 8626.26 808.614   8
   0   3  -4 1418.86 133.657   4
   0  -3  -4 1306.48 135.276   8
   0   3  -4 1883.25 136.304   2
  -3   0  -4 1428.98 134.905   6
   0   3  -4 1213.29 132.948   8
   3   0  -4 2256.44 135.176   2
   0  -3  -4 1467.63 133.751   4
   0   3  -4 1259.67 133.580   6
  -3   0  -4 2226.68 136.868   1
   0  -3  -4 1359.11 135.588   6
   0  -3  -4 1274.64 133.371   7
   0  -3  -4 1406.00 133.143   5
  -3   0  -4 1314.06 133.620   5
  -3   0  -4 1271.25 133.879   8
   0   3  -4 1319.89 133.075   8
   0   3  -4 2197.23 136.477   1
   0  -3  -3 1565.50 150.913   7
   0  -3  -3 1600.43 152.523   8
   0   3  -3 1610.75 150.648   8
   0  -3  -3 1462.28 151.739   3
   3   0  -3 1602.83 151.348   2
   0   3  -3 1532.41 152.415   2
  -3   0  -3 1518.00 151.972   6
   0   3  -3 1582.48 152.228   1
   3   0  -3 1703.49 151.936   7
   3   0  -3 1637.24 151.926   1
   0  -3  -3 1582.74 151.352   4
   3   0  -3 1729.18 151.932   3
  -3   0  -3 1395.91 152.070   1
   3   0  -3 1711.84 151.654   6
   0   3  -3 1752.42 150.679   8
  -3   0  -3 1557.99 151.728   7
  -3   0  -3 1478.87 151.411   8
   0   3  -3 1704.15 151.438   4
  -3   0  -3 1550.63 151.217   5
   3   0  -3 1700.98 152.185   8
   0   3  -3 1802.10 151.190   6
   0  -3  -3 1470.20 151.968   2
   0  -3  -3 1619.65 150.726   5
   3   0  -3 1829.49 152.452   5
   3   0  -3 1740.18 152.204   4
   0   3  -2 2144.91 137.532   1
   0  -3  -2 1164.17 136.509   6
   3   0  -2 2081.97 135.962   2
   0   3  -2 1733.23 137.174   2
   0  -3  -2 1991.58 137.130   2
  -3   0  -2 2227.05 137.361   1
   0  -3  -2 1242.00 135.295   7
  -3   0  -2 2142.52 137.380   2
  -3   0  -2 1238.89 135.969   8
   3   0  -2 1687.02 136.285   3
   0  -3  -2 1334.53 136.021   4
   3   0  -2 1212.23 136.281   8
   3   0  -2 1190.48 136.022   7
   0   3  -2 1273.91 136.495   7
  -3   0  -2 1185.63 136.026   7
   0  -3  -2 1581.70 136.396   3
   3   0  -2 1226.46 135.912   6
   0   3  -2 1716.50 136.842   3
   3   0  -2 2247.21 136.690   1
   0   3  -2 1234.22 135.387   6
   3   0  -2 1356.34 136.555   4
  -3   0  -2 1567.17 136.667   3
   0   3  -2 1329.32 136.774   3
  -3   0  -2 1247.71 135.781   5
  -3   0  -2 2290.35 137.457   1
   0   3  -2 1378.74 136.027   4
   3   0  -2 1341.88 136.540   5
   0  -3  -1 46212.2 4477.81   3
   0   3  -1 49402.1 4477.37   4
   3   0  -1 49594.6 4477.33   6
  -3   0  -1 49380.2 4477.05   4
   0  -3  -1 48396.0 4477.39   4
  -3   0  -1 48485.8 4477.36   1
   3   0  -1 49022.9 4476.94   3
   0   3  -1 48789.9 4477.59   5
   0   3  -1 47040.5 4477.48   1
   3   0  -1 47633.9 4476.86   1
  -3   0  -1 48286.7 4477.33   3
   0  -3  -1 49166.3 4477.68   8
   0  -3  -1 48284.2 4477.52   6
   0   3  -1 49239.4 4477.52   7
  -3   0  -1 49049.1 4477.26   5
  -3   0  -1 47932.3 4477.42   8
   0   3  -1 49439.1 4477.51   3
   3   0  -1 46910.8 4477.47   7
   0  -3  -1 48906.7 4477.43   1
  -3   0  -1 46886.0 4477.42   2
  -3   0   0 48.4942 7.59856   7
  -3   0   0 42.8726 6.75236   6
   3   0   0 63.0201 6.87499   3
   0  -3   0 47.9381 6.69030   7
   0  -3   0 48.7411 7.17662   5
   0   3   0 45.0018 6.64819   6
  -3   0   0 88.1565 6.21796   1
   0  -3   0 45.8196 7.00866   8
   3   0   0 76.3679 6.34112   1
   0   3   0 52.2441 7.30833   3
   0  -3   0 91.9920 8.02291   1
   0  -3   0 45.6794 6.55315   6
   0   3   0 52.2457 7.23207   8
   0   3   0 57.3496 7.08298   5
   0   3   0 45.7579 6.55380   7
  -3   0   0 57.2367 6.95044   4
  -3   0   0 52.6852 7.13296   3
   3   0   0 53.2160 7.73022   5
   3   0   0 51.0341 6.92653   4
   0  -3   0 55.2299 7.07917   3
  -3   0   1 48827.5 4446.78   6
  -3   0   1 49530.0 4447.16   8
   0   3   1 48856.5 4446.81   4
   3   0   1 45328.4 4446.92   2
   0  -3   1 49087.3 4446.86   4
   0  -3   1 47557.0 4446.96   1
   0   3   1 48210.7 4447.05   2
   0  -3   1 46941.8 4447.01   2
   0   3   1 45927.1 4447.03   6
   3   0   1 46599.5 4446.77   1
   0  -3   1 48625.8 4447.06   7
   3   0   1 48029.4 4446.84   3
  -3   0   1 48909.1 4446.48   3
   3   0   1 47943.2 4446.70   5
   3   0   1 48824.8 4446.81   8
   0   3   1 51446.1 4447.07   3
  -3   0   1 47945.3 4447.21   5
  -3   0   1 46574.4 4446.41   1
   3   0   1 49275.7 4446.47   4
  -3   0   2 2002.76 135.922   2
  -3   0   2 1147.01 136.512   8
   3   0   2 1565.17 136.984   3
   0  -3   2 2141.60 137.224   1
   3   0   2 1241.37 136.328   6
  -3   0   2 1288.93 136.231   6
   0   3   2 1510.64 136.578   3
   3   0   2 2047.89 137.429   2
   0  -3   2 1855.42 137.382   2
   3   0   2 1240.31 136.026   8
   0   3   2 2023.97 137.478   2
  -3   0   2 1374.28 136.694   5
  -3   0   2 2228.45 136.830   1
   3   0   2 1218.22 136.324   7
   3   0   2 1218.98 135.956   5
  -3   0   2 1271.79 136.693   4
   0  -3   2 1334.11 136.209   4
   0   3   2 1366.21 136.094   4
   0  -3   2 1191.20 135.493   6
   3   0   3 1529.89 151.293   8
   3   0   3 1449.30 151.228   5
   0  -3   3 1730.32 151.071   6
   3   0   3 1491.35 151.688   7
   0   3   3 1628.84 150.939   7
   0  -3   3 1529.35 151.730   1
  -3   0   3 1983.30 152.175   7
   0   3   3 1509.38 151.959   2
   0  -3   3 1696.47 152.569   5
  -3   0   3 1648.25 152.010   8
   0   3   3 1530.86 151.866   3
  -3   0   3 1774.16 152.228   5
   0  -3   3 1688.33 151.378   4
  -3   0   3 1697.61 152.121   4
  -3   0   3 1619.87 151.774   1
   0   3   3 1499.30 151.184   4
   3   0   3 1439.08 152.176   3
  -3   0   3 1609.41 151.127   2
  -3   0   3 1982.05 152.114   6
  -3   0   3 1600.55 151.638   3
   0   3   4 2203.10 140.485   2
  -3   0   4 1424.08 138.761   4
  -3   0   4 1372.04 138.718   5
  -3   0   4 1732.32 139.102   3
   0  -3   4 1378.64 139.581   5
  -3   0   4 1231.80 138.448   8
   0   3   4 1342.73 137.139   5
  -3   0   4 2311.83 140.220   1
  -3   0   4 1401.78 138.961   7
   3   0   4 1374.93 138.252   5
  -3   0   4 1301.63 138.671   6
  -3   0   4 2130.43 138.917   2
   0  -3   4 1159.04 139.083   7
   0  -3   4 1321.95 137.757   6
   0   3   4 1379.37 137.701   7
   3   0   4 1266.76 137.934   8
   0  -3   4 1394.42 137.695   4
   0   3   4 1632.48 139.673   3
   0   3   4 2208.69 141.397   1
   3   0   4 1328.26 138.679   7
  -3   0   5 8942.14 810.559   6
   0   3   5 8769.04 811.181   3
   3   0   5 8418.64 810.615   7
  -3   0   5 8350.83 810.371   3
   0   3   5 8761.83 811.536   1
   0  -3   5 9729.87 811.599   5
   3   0   5 8470.70 811.077   2
  -3   0   5 9242.92 810.773   7
  -3   0   5 8782.98 810.751   1
   0   3   5 8774.77 811.094   2
  -3   0   5 8494.23 810.451   4
   0  -3   5 8326.09 810.785   3
   3   0   5 8969.14 810.102   5
  -3   0   5 8565.74 810.486   5
   0   3   5 9063.68 809.236   5
  -3   0   5 8484.23 810.238   8
   0   3   5 8847.37 809.785   7
  -3   0   5 8491.28 809.971   2
   0  -3   5 8650.32 809.502   4
   0  -3   5 8690.24 811.172   7
   3   0   6 874.778 97.6130   7
  -3   0   6 1552.63 100.021   1
   0   3   6 1088.63 99.1105   3
   0   3   6 1369.47 100.715   1
  -3   0   6 947.575 96.9082   4
  -3   0   6 1374.08 97.7361   2
  -3   0   6 919.422 97.1903   5
   0  -3   6 1087.17 98.8820   3
   0  -3   6 927.133 98.5505   5
   0   3   6 1405.30 99.8921   2
   0   3   6 874.720 96.3636   7
   0  -3   6 877.372 98.5010   7
   3   0   6 1386.22 100.281   2
  -3   0   6 847.442 97.1854   7
  -3   0   6 902.445 96.8423   8
   3   0   6 853.346 96.5358   5
   0  -3   6 872.017 95.4308   4
  -3   0   6 1183.15 98.1753   3
   0   3   6 825.666 95.2842   5
   0   3   7 202.590 28.7689   3
   3   0   7 220.552 27.6641   7
  -3   0   7 189.384 25.2122   4
   0  -3   7 223.838 28.3490   3
  -3   0   7 211.299 27.2912   3
   0  -3   7 208.452 28.7907   5
  -3   0   7 140.267 26.2872   5
   0   3   7 191.866 23.3620   5
  -3   0   7 195.212 25.6652   2
  -3   0   7 187.375 27.2341   1
   0   3   7 236.487 25.9574   7
   0   3   7 256.933 29.5877   1
   0  -3   7 206.076 29.2155   7
  -3   0   7 224.996 27.7309   7
   0   3   7 248.218 28.0723   2
   3   0   7 189.422 28.1262   2
   3   0   7 211.586 26.3125   5
   0  -3   7 175.480 23.0829   4
   3   0   8 279.163 32.4390   2
  -3   0   8 283.259 28.8170   2
  -3   0   8 214.252 30.3011   3
   0   3   8 273.003 31.1953   2
   0  -3   8 194.845 24.3738   4
   0   3   8 128.868 26.6026   7
   0   3   8 227.327 32.4889   1
   3   0   8 195.724 28.7982   5
   0   3   8 264.878 32.8065   3
   0  -3   8 174.397 31.5867   7
  -3   0   8 189.476 30.9810   7
  -3   0   8 142.285 25.7539   4
  -3   0   8 189.377 28.5320   5
   3   0   8 193.670 32.1808   3
   0  -3   8 217.414 31.8505   5
   0  -3   8 194.659 31.7015   3
   0   3   8 167.362 24.9219   5
   3   0   8 150.223 29.8124   7
   0   3   9 31.8609 26.2464   1
  -3   0   9 8.47550 26.4066   3
   3   0   9 42.2955 28.7810   3
   0  -3   9 35.7720 16.2044   4
   3   0   9 13.7253 25.9079   2
   0   3   9-14.2107 27.5078   3
   3   0   9 29.5453 25.0124   7
   0  -3   9-9.04945 28.6956   3
  -3   0   9 16.3777 23.5071   5
   3   0   9 5.32552 23.9055   5
   0  -3   9 34.8404 28.0153   7
   0  -3   9 62.7694 26.4170   5
  -3   0   9 26.0213 25.0368   7
   0   3   9 48.8481 23.9288   7
  -3   0   9 42.3177 22.4299   2
   0   3   9 58.5359 18.5258   5
   0   3   9 4.39993 23.8806   2
   0   3  10 3.98849 23.8227   7
   0   3  10 22.1060 27.0117   1
   0  -3  10 52.1908 29.3766   7
   3   0  10 40.8055 26.6274   2
   3   0  10 17.8412 23.9184   5
   0  -3  10 30.8408 27.2426   3
   0  -3  10-2.47751 27.3067   5
   3   0  10 19.0668 25.6419   7
   0   3  10 31.7106 27.2218   3
  -3   0  10 8.10823 23.7207   5
   3   0  10-55.6137 32.5760   3
  -3   0  10 35.9967 26.9172   3
  -3   0  10-22.5868 26.9736   7
   0   3  10 22.1210 25.0940   2
   3   0  11 21.3733 28.3897   3
   0  -3  11 13.4020 27.8032   5
  -3   0  11 5.04435 27.7492   7
   0   3  11 5.85646 28.5550   3
   0  -3  11 2.89326 30.5361   7
  -3   0  11 6.65788 23.5396   5
  -3   0  11-2.68516 26.5831   3
   0   3  11 37.6613 25.5689   2
   3   0  11 5.68194 25.9024   2
   3   0  11 5.28296 26.7210   7
   0   3  11 49.2861 24.4597   7
   0  -3  11 20.1145 28.4430   3
   0  -3  12 9.55489 30.8265   3
  -3   0  12 11.9176 27.4827   3
   0  -3  12 25.8019 29.6761   5
   3   0  12-2.93405 30.3017   7
   0   3  12-28.6999 29.0757   3
  -3   0  12 11.1827 30.6384   7
   0   3  12 58.9059 29.2328   2
   3   0  12 13.4152 30.2207   3
   0  -3  12 57.3424 31.9945   7
  -3   0  13 6.55386 31.1087   3
   3   0  13-28.8732 32.0343   7
  -3   0  13-47.8196 33.6848   7
   0  -3  13-49.2154 32.1975   3
   0  -3  13 3.45537 32.7148   7
   3   0  13 29.2477 33.9595   3
   0   3  13 47.6565 31.2638   2
   0   3  13-3.47632 30.6349   3
   0   3  14-15.0506 35.9048   3
   3   0  14-19.7451 36.9825   3
  -3   0  14 28.4725 33.5126   3
   3   0  14 3.47201 34.9972   7
   0  -3  14 26.0444 37.9425   7
   3   0  15 37.6661 38.5526   3
   0   3  15 44.0296 37.2870   3
   0  -3  15-55.5878 41.8735   7
  -3  -1 -15-61.7494 35.4765   6
   3   1 -15-25.1955 37.8027   3
   1  -3 -15-11.0328 29.7055   2
   3   1 -15 24.7105 35.9627   1
  -1   3 -15 9.42793 38.0681   1
  -1   3 -15-4.23664 35.5720   2
  -3  -1 -15-61.4872 42.1961   1
   1  -3 -15-7.06857 32.4728   6
  -3  -1 -15-21.2870 35.7461   2
   1  -3 -15 91.6459 39.1692   1
  -1   3 -14-28.1468 35.4284   2
   1  -3 -14 36.4440 32.2060   1
   3   1 -14 15.2270 32.8085   1
   3   1 -14 30.6675 32.8550   2
  -1   3 -14 55.9555 36.4929   1
  -3  -1 -14-9.59077 28.7703   6
  -3  -1 -14-60.9223 39.9638   1
  -3  -1 -14 3.96425 35.9906   2
   1  -3 -14-6.69636 31.5254   6
   3   1 -13 37.7308 27.3644   2
   3   1 -13-48.6012 31.6128   1
   1  -3 -13-3.75008 31.7985   1
   1  -3 -13-15.8039 31.5607   6
  -1   3 -13-7.80570 34.4974   1
  -3  -1 -13-3.95722 35.5101   1
   1  -3 -13 2.57039 26.2771   8
  -3  -1 -13-11.8228 29.9362   6
  -1   3 -13-11.2580 37.1981   2
   1  -3 -12 7.43110 24.5506   8
  -3  -1 -12-39.4174 33.0948   1
   1  -3 -12 20.7011 32.3970   1
   1  -3 -12-5.89492 27.6765   6
   3   1 -12 3.15989 30.1511   1
   3   1 -12-12.6019 23.8583   6
  -1   3 -12-17.2438 28.3483   2
  -1   3 -12 2.23789 24.2480   6
   3   1 -12 23.3837 27.2969   2
  -3  -1 -12 29.8738 27.0481   6
  -1   3 -12-10.4800 33.2447   1
   3   1 -11 37.5891 25.9850   2
   3   1 -11 5.67310 26.7374   1
  -1   3 -11 12.0908 20.7292   6
  -3  -1 -11 3.20453 28.6946   1
   1  -3 -11-30.5310 26.4456   8
   3   1 -11 40.5894 22.0216   8
  -1   3 -11 25.5179 28.9018   2
  -3  -1 -11-1.80788 21.4957   8
   3   1 -11-11.5980 25.4709   6
   1  -3 -11 24.6309 27.4176   6
  -3  -1 -11 39.6155 25.1634   6
  -1   3 -11 40.6227 27.8146   1
  -1   3 -10 104.988 31.7412   2
  -3  -1 -10 19.9779 21.6172   8
   3   1 -10 2.41895 26.6167   2
   1  -3 -10 75.5243 28.7573   6
  -1   3 -10 32.1670 22.6266   6
   3   1 -10 56.0969 22.5246   8
   1  -3 -10 28.7416 24.4674   8
   3   1 -10 65.5266 25.3483   6
  -3  -1 -10 29.1471 24.8051   6
  -1   3 -10 8.26140 29.8744   1
   3   1 -10 35.3415 26.9748   1
   3   1  -9 12.8571 25.7359   2
   3   1  -9-15.1288 23.0497   6
  -1   3  -9-2.60890 27.6267   2
  -3  -1  -9 10.0217 22.5873   6
  -1   3  -9-9.66535 27.6378   1
   3   1  -9 3.33934 21.3128   8
   1  -3  -9 25.0790 27.2908   6
  -1   3  -9 4.73536 20.2667   6
   3   1  -9 22.2396 23.9992   1
   1  -3  -9 14.2353 24.2613   8
   1  -3  -9 2.33698 15.9134   4
  -3  -1  -9 3.02131 19.9522   8
  -1   3  -9-13.6706 14.8840   8
  -1   3  -8 497.767 57.0339   2
  -1   3  -8 514.654 49.4632   8
   1  -3  -8 580.387 55.8918   6
  -3  -1  -8 452.755 46.8179   4
   3   1  -8 494.171 51.9690   8
   3   1  -8 552.097 54.5799   2
  -1   3  -8 459.507 51.5909   6
   1  -3  -8 572.001 54.4701   8
   3   1  -8 505.686 54.2844   1
  -1   3  -8 566.651 56.3948   1
  -3  -1  -8 474.596 54.2880   6
   1  -3  -8 461.458 49.9543   4
  -3  -1  -8 508.597 52.0177   8
   3   1  -8 549.805 53.4919   6
  -1   3  -7 11.9953 18.4288   2
   1  -3  -7-1.80342 17.3160   6
  -1   3  -7 8.96779 15.9675   1
   3   1  -7-5.77211 15.0707   6
  -1   3  -7 15.5851 9.65136   8
   1  -3  -7 13.7961 10.9001   4
   1  -3  -7 8.32415 15.6099   8
  -3  -1  -7 2.93024 4.76781   4
   3   1  -7 6.61833 12.7866   8
  -1   3  -7 12.9145 12.4834   6
  -3  -1  -7 10.7601 4.69193   4
  -3  -1  -7 9.60063 13.6730   8
  -3  -1  -7 10.9000 14.7217   6
   3   1  -7 31.2986 15.6964   1
  -3  -1  -6 3281.74 287.358   8
   3   1  -6 3235.75 287.836   6
  -1   3  -6 3160.93 287.016   6
  -3  -1  -6 3008.72 284.778   4
  -3  -1  -6 3045.92 284.675   4
  -1   3  -6 3104.59 285.805   8
   1  -3  -6 3157.64 288.497   8
  -3  -1  -6 3030.57 288.304   6
  -1   3  -6 3165.52 286.073   8
  -1   3  -6 2967.78 285.657   4
   1  -3  -6 3088.46 286.643   4
   1  -3  -6 3336.82 289.223   6
  -1   3  -6 2805.99 288.364   1
  -3  -1  -6 2904.67 288.604   1
  -1   3  -6 3138.03 289.282   2
  -3  -1  -5 1295.32 120.780   6
   1  -3  -5 1289.33 118.718   5
   1  -3  -5 1296.90 121.669   6
  -3  -1  -5 1198.47 117.074   4
  -1   3  -5 1247.75 118.260   8
  -3  -1  -5 1221.76 119.784   8
  -1   3  -5 1837.28 123.565   2
  -1   3  -5 1187.46 118.050   8
  -1   3  -5 1260.43 119.074   6
  -1   3  -5 1317.19 118.287   4
   1  -3  -5 1309.29 121.589   8
   1  -3  -5 1267.98 119.254   4
  -3  -1  -5 1182.57 116.964   4
  -1   3  -4 19449.2 1793.31   4
   1  -3  -4 17178.8 1793.72   4
   1  -3  -4 19065.6 1793.93   4
  -1   3  -4 19855.6 1793.11   8
   1  -3  -4 19930.0 1795.15   8
  -3  -1  -4 19547.3 1794.17   8
   1  -3  -4 19833.8 1793.53   7
  -1   3  -4 18590.6 1794.91   1
  -1   3  -4 19598.4 1793.76   6
   3   1  -4 20206.8 1793.93   6
   1  -3  -4 20506.7 1793.54   5
  -1   3  -4 19391.2 1792.97   8
   3   1  -4 19581.8 1794.27   8
  -1   3  -4 19406.2 1795.27   2
  -3  -1  -4 18996.6 1793.35   5
   3   1  -4 19103.8 1793.98   2
  -3  -1  -4 18891.0 1794.70   6
   3   1  -3 1448.15 134.943   4
   1  -3  -3 1352.94 134.530   4
  -1   3  -3 1278.08 133.302   8
   1  -3  -3 1427.13 133.877   5
   1  -3  -3 2140.61 135.732   2
  -1   3  -3 1437.50 133.979   4
   1  -3  -3 1748.98 135.039   3
   1  -3  -3 1322.18 133.734   7
  -3  -1  -3 1283.67 134.548   8
   3   1  -3 2222.58 135.012   2
  -3  -1  -3 1336.02 134.421   7
   3   1  -3 1366.75 134.565   8
  -3  -1  -3 1314.30 133.823   5
   3   1  -3 1308.78 134.849   7
   3   1  -3 1370.74 134.181   6
   3   1  -3 1874.72 135.445   3
   1  -3  -3 1344.34 133.860   5
   1  -3  -3 1347.24 135.492   8
  -1   3  -3 2219.06 136.682   1
  -1   3  -3 1352.05 134.068   6
   3   1  -3 1995.70 135.176   2
   3   1  -3 2468.78 135.877   1
  -1   3  -3 1170.51 133.196   8
   3   1  -2 118122. 10684.9   6
   1  -3  -2 115060. 10685.3   2
   1  -3  -2 115765. 10684.6   5
  -3  -1  -2 118600. 10685.6   1
   3   1  -2 114384. 10685.3   3
  -1   3  -2 115326. 10685.0   4
   3   1  -2 110205. 10685.7   5
  -3  -1  -2 118077. 10685.6   2
   3   1  -2 114839. 10684.9   2
  -1   3  -2 115902. 10684.9   6
  -3  -1  -2 115948. 10685.2   7
   1  -3  -2 113311. 10685.1   3
   3   1  -2 113702. 10685.2   3
   3   1  -2 109228. 10685.3   7
  -3  -1  -2 117275. 10684.8   5
   3   1  -2 115155. 10685.6   4
   1  -3  -2 115072. 10685.3   4
   3   1  -2 114681. 10685.0   1
   3   1  -2 116593. 10684.8   2
  -1   3  -2 117551. 10685.6   3
  -3  -1  -2 116065. 10685.3   8
  -1   3  -2 117613. 10685.6   7
  -3  -1  -2 116931. 10685.5   3
   3   1  -2 117846. 10685.4   8
   1  -3  -1 79.5821 9.71592   8
  -3  -1  -1 73.9992 9.52275   6
   1  -3  -1 68.4641 9.79968   6
  -1   3  -1 68.8583 8.19498   6
  -1   3  -1 66.7903 9.24907   7
   3   1  -1 63.2019 8.54812   6
   3   1  -1 79.7334 8.71507   3
  -3  -1  -1 109.557 10.0064   2
  -3  -1  -1 61.4515 9.89343   7
  -3  -1  -1 120.212 9.68426   1
  -1   3  -1 79.3207 9.38886   3
  -1   3  -1 72.2375 9.14848   4
   1  -3  -1 68.7430 9.56595   3
   1  -3  -1 112.923 9.58605   2
   3   1  -1 71.5735 9.10741   8
  -3  -1  -1 65.3943 8.95881   5
  -3  -1  -1 87.7150 8.46822   4
  -1   3  -1 75.8758 9.90334   5
  -3  -1  -1 84.7456 10.2088   3
   1  -3  -1 75.7609 8.03521   5
   1  -3   0 256.187 27.1172   4
  -3  -1   0 251.909 27.3713   5
   3   1   0 268.201 26.9970   4
   1  -3   0 354.337 26.8541   3
  -3  -1   0 271.576 27.2826   3
  -1   3   0 287.608 26.8726   6
  -1   3   0 268.595 26.7297   3
  -1   3   0 270.842 26.7215   5
  -3  -1   0 279.989 27.0551   6
  -1   3   0 270.429 26.5506   7
   3   1   0 297.047 27.3590   5
   3   1   0 290.865 26.7187   2
  -1   3   0 387.147 27.3283   8
  -3  -1   0 260.281 27.0558   4
  -3  -1   0 280.916 26.6570   2
   1  -3   0 254.580 26.6958   6
  -1   3   0 315.028 27.0164   2
   1  -3   0 266.559 26.8595   5
   3   1   0 259.035 27.6329   3
   1  -3   0 267.255 26.9373   8
   1  -3   0 261.882 26.6257   7
   3   1   0 276.601 27.0247   6
   3   1   1 78.8305 10.0193   7
  -1   3   1 109.276 10.6103   2
   1  -3   1 73.5508 9.87549   3
  -3  -1   1 79.1947 8.96126   3
   1  -3   1 112.482 10.7207   1
   3   1   1 85.5066 10.1281   3
   3   1   1 79.2169 9.39883   8
  -3  -1   1 57.7520 8.78541   6
  -1   3   1 84.1760 9.65753   4
   1  -3   1 68.3501 8.63461   6
   3   1   1 79.8443 8.73799   4
  -1   3   1 90.3182 10.0227   3
  -1   3   1 69.8609 10.5236   6
   3   1   1 108.993 10.2571   2
  -3  -1   1 63.3240 9.43164   8
  -1   3   1 79.8889 8.60900   5
   3   1   1 78.8921 9.37292   5
   1  -3   1 74.6226 9.84890   4
   1  -3   1 72.8447 9.89298   7
   3   1   2 119182. 10646.8   1
  -3  -1   2 115199. 10646.8   5
  -1   3   2 112884. 10645.8   5
   3   1   2 112916. 10646.4   8
   1  -3   2 115059. 10646.7   3
   1  -3   2 112966. 10646.7   1
  -1   3   2 116089. 10646.4   4
  -3  -1   2 114472. 10646.1   1
   3   1   2 108491. 10646.6   3
  -3  -1   2 127174. 10646.8   7
  -1   3   2 116226. 10646.5   2
  -3  -1   2 116879. 10646.5   8
   1  -3   2 113956. 10646.0   4
   3   1   2 114279. 10646.8   2
  -3  -1   2 117842. 10646.1   6
   1  -3   2 115456. 10645.8   6
  -3  -1   2 116132. 10646.8   4
   3   1   2 115739. 10646.4   7
  -1   3   2 114900. 10646.9   1
  -1   3   2 113339. 10646.3   3
   3   1   2 114520. 10645.9   5
   3   1   3 2449.44 142.345   1
   3   1   3 1303.89 139.872   8
  -1   3   3 1749.85 140.643   3
  -3  -1   3 1414.87 140.580   5
  -1   3   3 1376.46 139.801   4
  -1   3   3 2315.96 142.311   1
   1  -3   3 1414.06 140.741   5
  -3  -1   3 1365.95 139.800   6
  -3  -1   3 1311.08 140.140   8
   1  -3   3 1270.97 139.327   6
  -3  -1   3 2550.35 141.064   1
   1  -3   3 1398.22 139.368   4
  -1   3   3 2285.43 141.387   2
  -1   3   3 1357.93 139.145   7
   3   1   3 1297.77 139.902   7
   3   1   3 1375.97 139.373   5
  -3  -1   3 1418.26 140.503   7
  -1   3   3 1268.06 140.673   6
  -3  -1   3 1482.28 140.409   4
  -3  -1   4 20059.6 1780.96   6
   1  -3   4 19195.4 1780.18   4
  -3  -1   4 18901.0 1781.50   5
  -1   3   4 19888.9 1780.18   5
  -1   3   4 19325.1 1780.38   7
   1  -3   4 18910.0 1781.72   7
  -1   3   4 18102.3 1781.78   1
  -3  -1   4 19392.2 1781.00   8
  -3  -1   4 19027.2 1781.20   4
  -1   3   4 18607.8 1781.35   3
  -1   3   4 18757.5 1781.69   6
   3   1   4 18954.3 1781.08   7
   3   1   4 18259.0 1781.77   1
  -3  -1   4 19168.2 1781.17   1
   1  -3   4 20394.9 1781.82   5
  -3  -1   4 20563.6 1781.76   7
   3   1   4 19315.1 1780.49   5
  -1   3   4 18364.1 1781.25   2
  -3  -1   4 19206.8 1781.18   3
   1  -3   4 19698.8 1780.65   6
  -3  -1   5 1418.86 139.949   5
  -1   3   5 2169.44 142.646   1
  -1   3   5 2096.79 141.641   2
   1  -3   5 1409.76 140.732   5
   3   1   5 2209.50 142.671   2
  -3  -1   5 1363.78 139.595   4
  -1   3   5 1235.42 138.646   7
  -3  -1   5 2266.88 141.605   1
  -3  -1   5 1236.26 138.901   8
  -3  -1   5 1369.62 140.134   7
   1  -3   5 1432.51 138.011   4
  -1   3   5 1677.81 140.902   3
   1  -3   5 1246.16 140.337   7
  -3  -1   5 1724.12 140.477   3
  -3  -1   5 1320.31 139.032   6
   3   1   5 1376.84 138.629   5
   3   1   5 1248.67 139.509   7
  -1   3   5 1292.86 138.074   5
  -3  -1   6 3141.52 290.344   7
   1  -3   6 3411.12 291.114   5
  -3  -1   6 2995.94 290.011   3
   1  -3   6 2914.15 287.998   4
  -1   3   6 3053.82 288.984   7
  -3  -1   6 3123.75 290.320   5
   1  -3   6 3216.39 291.013   7
  -1   3   6 3246.15 291.016   3
  -1   3   6 3078.45 288.488   5
  -1   3   6 2886.72 290.776   1
  -1   3   6 3163.23 290.378   2
  -3  -1   6 3036.45 289.413   4
   3   1   6 3389.77 289.323   5
   3   1   6 2909.92 290.714   2
   3   1   6 3083.02 290.020   7
  -3  -1   6 3108.35 289.144   8
   3   1   7 15.8837 12.7966   5
  -1   3   7 9.82260 11.3046   5
   1  -3   7 5.36141 17.6012   7
  -3  -1   7 7.86978 14.9211   5
  -3  -1   7 19.9140 12.7597   4
   3   1   7-5.47874 16.5511   2
  -1   3   7 27.7627 15.8474   2
  -3  -1   7 6.28952 14.9459   3
  -3  -1   7 6.46321 16.6475   7
  -1   3   7-25.9947 13.4910   7
  -1   3   7 24.6132 16.7505   3
  -1   3   7 22.4583 16.5091   1
   3   1   7 6.11819 15.9025   7
   1  -3   7 13.9836 16.6981   3
   1  -3   7 19.0725 18.1412   5
   1  -3   7 11.1844 8.86767   4
   3   1   7 1.94848 18.6095   3
  -1   3   8 419.969 53.4114   2
   3   1   8 510.727 54.0501   7
   3   1   8 446.148 55.1887   2
  -3  -1   8 507.736 53.9955   3
   1  -3   8 469.894 55.3429   7
   1  -3   8 453.980 49.0502   4
  -1   3   8 391.828 55.1339   1
   1  -3   8 563.783 55.8537   5
  -1   3   8 493.787 55.0709   3
   3   1   8 496.464 56.3486   3
  -1   3   8 549.836 53.0107   7
  -3  -1   8 588.727 55.6437   7
  -1   3   8 482.592 50.6814   5
  -3  -1   8 469.694 51.9496   4
   1  -3   8 562.927 55.4841   3
  -3  -1   8 500.417 54.0891   5
   3   1   8 546.852 52.4116   5
  -3  -1   9-30.7986 20.0768   4
   3   1   9 1.63869 21.6162   5
  -3  -1   9 10.5264 27.1112   7
   3   1   9 67.4356 28.4814   2
   3   1   9 8.11624 23.7987   7
  -3  -1   9 16.8783 25.8002   3
   3   1   9 50.1703 29.6758   3
  -1   3   9-2.42731 25.3191   1
   1  -3   9 11.5710 27.8883   3
   1  -3   9-16.3903 27.2218   7
  -1   3   9-36.8115 27.1714   3
  -1   3   9 32.6626 22.8630   7
   1  -3   9-8.85010 26.6193   5
  -1   3   9 6.63958 17.5666   5
  -3  -1   9-13.7390 24.3837   5
  -1   3   9 23.3936 23.2340   2
  -1   3  10 55.1274 24.3005   7
   1  -3  10 57.7661 28.2103   3
   3   1  10 31.0951 27.3211   2
  -1   3  10 15.4391 28.6690   3
  -3  -1  10 40.2309 27.0566   7
   1  -3  10 24.3713 26.4342   5
  -3  -1  10 31.1034 25.9070   3
   3   1  10 34.4059 26.8094   7
  -3  -1  10 36.6302 23.9474   5
   3   1  10 78.7657 23.8905   5
   3   1  10 13.9887 28.9484   3
  -1   3  10 49.6687 24.9266   2
  -1   3  10-5.45259 29.2737   1
   1  -3  10 65.3729 29.8490   7
  -1   3  11 19.8633 25.4908   7
   1  -3  11 38.0311 28.6550   3
  -1   3  11 14.2768 29.0651   3
  -1   3  11 49.5922 26.2003   2
  -3  -1  11 8.10209 27.1083   3
  -3  -1  11-34.2490 30.4221   7
   1  -3  11 16.0898 26.1378   5
   3   1  11-2.85709 27.2782   2
   3   1  11 3.09219 29.9057   3
   1  -3  11-8.69358 30.3047   7
   3   1  11-12.7253 27.3666   7
  -3  -1  11 26.0265 25.2853   5
   1  -3  12-35.1554 31.9075   7
   1  -3  12-16.1758 29.5415   3
  -3  -1  12 2.91454 29.5148   7
   3   1  12-25.0654 30.0537   2
  -1   3  12 28.1636 30.4817   3
   3   1  12-3.36050 33.3075   3
   1  -3  12 28.7025 29.4709   5
  -1   3  12-5.69166 25.6861   2
  -3  -1  12-3.00091 29.3050   3
  -3  -1  12-2.55577 25.1456   5
   3   1  12 8.48521 29.4996   7
  -3  -1  13 32.9365 31.5433   3
  -1   3  13 20.4395 30.5086   3
  -1   3  13 43.2296 29.9602   2
   1  -3  13 34.9675 34.2628   7
   1  -3  13 10.6420 32.1436   3
   3   1  13 7.31394 32.8438   3
   3   1  13-27.8351 29.4688   7
   1  -3  14-26.2997 35.9120   7
  -1   3  14-36.8489 35.2241   3
   1  -3  14-38.4506 36.5565   3
   3   1  14 7.89997 37.3512   3
  -3  -1  14-16.6237 34.9681   7
  -1   3  15-31.5779 34.8957   3
   3   1  15-4.19554 37.0896   3
   1  -3  15 12.0212 39.6275   7
   2  -3 -15 4.24817 33.4438   1
  -3  -2 -15-42.4275 35.1693   6
  -2   3 -15-4.81933 39.6507   1
  -3  -2 -15-33.0332 43.6163   1
  -2   3 -15-4.36657 35.5494   2
   3   2 -15-12.7059 36.5405   3
   3   2 -15-16.6353 35.4173   1
   2  -3 -15 17.5046 32.7386   6
  -3  -2 -15-71.7271 37.8951   2
  -2   3 -14 4.39430 36.7563   1
   2  -3 -14-3.34056 32.9485   6
  -3  -2 -14 73.8796 38.6440   1
  -2   3 -14-28.8177 37.4842   2
   3   2 -14 53.6203 32.0366   1
   3   2 -14-20.0425 36.4981   3
  -3  -2 -14-13.2259 31.7164   6
   2  -3 -14-7.92641 34.1570   1
   3   2 -14-17.5545 30.9347   2
   2  -3 -13 12.6292 29.4202   6
  -3  -2 -13 21.4949 27.9754   6
   3   2 -13 48.9825 32.4182   1
  -3  -2 -13 47.8076 35.9710   1
   3   2 -13-13.0863 30.9845   2
   2  -3 -13 7.34610 31.8737   1
  -2   3 -13 61.1940 31.8954   2
  -2   3 -13-12.0015 33.0141   1
   2  -3 -13-36.9675 28.8018   8
  -2   3 -12 13.5687 22.9623   6
   3   2 -12-19.0109 30.0798   1
   3   2 -12-27.0111 28.9436   2
  -3  -2 -12-25.1498 22.8095   8
   2  -3 -12-23.6908 29.7332   1
  -2   3 -12 3.57603 32.7530   2
   2  -3 -12 20.7494 29.1698   6
  -3  -2 -12 22.6248 25.9055   6
   2  -3 -12-27.9667 25.6328   8
  -2   3 -12-3.58923 31.4339   1
  -3  -2 -12 7.20669 30.0425   1
   3   2 -12-2.38703 25.2301   6
  -3  -2 -11 38.7973 27.0582   6
  -3  -2 -11-3.90773 21.5421   8
  -2   3 -11 41.3644 30.3812   1
   3   2 -11 15.2740 21.5494   6
  -2   3 -11 36.0895 30.3210   2
   2  -3 -11-14.5890 25.3838   8
   3   2 -11 5.66812 26.7070   1
  -3  -2 -11-6.48329 29.8749   1
  -2   3 -11 14.2663 19.9329   6
   3   2 -11 5.48949 26.0753   2
   2  -3 -11 27.5865 27.2977   6
  -2   3 -10 90.2436 32.5789   1
   3   2 -10 66.9206 22.6617   8
   2  -3 -10 71.8120 20.6816   4
   2  -3 -10 91.0481 29.8408   6
   3   2 -10 124.829 30.4803   2
  -2   3 -10 110.969 35.6340   2
   3   2 -10 130.903 29.4039   1
   3   2 -10 77.2207 25.4393   6
  -3  -2 -10 70.0784 24.4587   8
  -3  -2 -10 112.180 30.1378   6
   2  -3 -10 84.3740 27.9383   8
  -2   3 -10 65.5833 24.5685   6
   3   2  -9 43.2290 21.4328   8
   3   2  -9 65.6503 24.1070   6
  -2   3  -9 27.1190 27.7174   1
   3   2  -9 72.5671 27.4425   1
  -2   3  -9 8.06731 31.7554   2
  -2   3  -9 37.3152 16.3806   8
   2  -3  -9 61.5578 29.2117   6
   2  -3  -9 22.6636 19.2329   4
   2  -3  -9 56.9959 27.4360   8
   3   2  -9 91.6730 28.2362   2
  -2   3  -9 20.8665 21.2355   6
  -3  -2  -9 16.7560 26.8764   6
  -3  -2  -9 31.1063 23.5507   8
  -2   3  -8 239.801 35.4969   2
  -3  -2  -8 160.267 29.9787   6
   2  -3  -8 200.802 25.1039   4
  -3  -2  -8 179.102 20.0906   4
  -2   3  -8 146.213 23.0264   8
  -2   3  -8 339.071 34.0561   1
   3   2  -8 163.552 26.4981   8
  -3  -2  -8 184.207 27.7746   8
   2  -3  -8 201.339 31.3699   6
   2  -3  -8 240.223 31.5341   8
   3   2  -8 177.216 28.0506   6
  -2   3  -8 198.797 26.5927   6
   3   2  -8 185.286 31.7949   2
   3   2  -8 322.626 31.8637   1
  -3  -2  -7 494.812 54.1788   6
   2  -3  -7 509.407 54.8515   8
  -3  -2  -7 492.728 48.7880   4
   2  -3  -7 528.153 55.2523   6
  -2   3  -7 523.756 50.2590   8
  -3  -2  -7 484.253 48.5117   4
   2  -3  -7 521.818 51.6781   4
  -2   3  -7 515.947 49.1973   4
  -2   3  -7 563.875 55.4711   1
  -3  -2  -7 531.825 53.0362   8
  -2   3  -7 518.726 51.9596   6
   3   2  -7 546.077 54.5537   2
  -2   3  -7 563.646 56.6706   2
   3   2  -7 485.370 52.2220   6
   3   2  -7 503.208 52.1192   8
   3   2  -7 567.882 54.0737   1
   3   2  -6 119.870 19.2029   1
  -3  -2  -6 113.151 11.6636   4
  -2   3  -6 99.1791 16.0568   6
  -2   3  -6 135.877 23.4741   2
  -2   3  -6 88.0761 13.8359   8
  -3  -2  -6 98.9029 11.3905   4
  -2   3  -6 152.611 21.4197   1
   3   2  -6 61.7719 16.1396   6
  -3  -2  -6 87.6393 17.7923   8
   2  -3  -6 90.9260 15.4448   4
  -3  -2  -6 92.8863 19.8048   6
   3   2  -6 102.407 19.3148   2
  -2   3  -6 97.9126 13.6861   8
   2  -3  -6 81.8557 20.4668   8
  -2   3  -6 94.2489 12.6013   4
   2  -3  -5 2850.01 248.641   8
  -3  -2  -5 2314.14 244.992   4
  -3  -2  -5 2627.95 245.642   5
  -3  -2  -5 2618.33 247.247   8
  -3  -2  -5 2655.53 244.985   4
  -2   3  -5 2567.03 248.248   1
  -2   3  -5 2634.16 248.878   2
   2  -3  -5 2597.77 246.816   4
   3   2  -5 2920.24 247.927   2
   2  -3  -5 2921.10 246.593   5
  -2   3  -5 2668.47 245.600   8
   3   2  -5 3005.13 247.890   1
  -2   3  -5 2761.75 245.469   4
  -3  -2  -5 2653.32 248.065   6
  -2   3  -5 2598.92 246.675   6
  -2   3  -4 1036.02 98.6698   6
  -3  -2  -4 1039.11 99.5842   8
  -2   3  -4 957.981 97.4289   8
  -3  -2  -4 972.266 99.9754   6
   3   2  -4 1424.30 100.025   2
   3   2  -4 931.241 98.4814   8
  -2   3  -4 1056.69 97.6421   4
   3   2  -4 954.197 98.2276   6
   2  -3  -4 1041.77 100.550   8
   2  -3  -4 1027.72 98.9870   4
  -3  -2  -4 1024.95 97.2055   4
   2  -3  -4 987.629 98.5489   5
   2  -3  -4 1052.11 98.4548   5
  -3  -2  -4 1031.45 97.6825   5
   2  -3  -4 1042.78 98.3308   7
   3   2  -3 50009.5 4650.60   1
   3   2  -3 49866.2 4651.20   3
   2  -3  -3 50102.4 4650.59   3
   3   2  -3 48979.5 4650.59   1
  -3  -2  -3 51044.8 4649.87   5
   2  -3  -3 49813.9 4650.34   5
   3   2  -3 49391.0 4650.74   2
  -3  -2  -3 51472.8 4649.69   4
  -3  -2  -3 50861.9 4650.47   7
   2  -3  -3 51249.0 4650.16   7
  -2   3  -3 50476.8 4650.53   6
  -2   3  -3 50121.4 4649.67   8
   3   2  -3 50102.1 4650.55   8
   2  -3  -3 49415.4 4650.25   5
  -2   3  -3 50452.1 4649.99   4
   2  -3  -3 49700.7 4650.74   2
   2  -3  -3 49583.7 4650.93   4
   3   2  -3 50234.2 4650.52   2
   3   2  -3 50075.2 4650.96   3
  -3  -2  -3 51007.0 4651.06   8
   3   2  -3 50131.1 4650.12   6
  -2   3  -2 105.702 13.7578   8
  -3  -2  -2 122.884 14.3282   5
   2  -3  -2 134.562 15.7527   4
   3   2  -2 133.857 15.2979   8
  -3  -2  -2 120.781 16.1026   8
   2  -3  -2 131.691 14.7588   5
  -3  -2  -2 112.993 15.1648   7
  -2   3  -2 117.398 14.4387   4
   3   2  -2 192.832 15.3906   2
  -3  -2  -2 195.637 16.9672   2
   3   2  -2 110.076 16.1127   4
  -2   3  -2 117.880 14.9270   6
   3   2  -2 130.994 14.3557   6
  -3  -2  -2 134.118 14.3647   4
   2  -3  -2 171.901 15.2123   3
   3   2  -2 144.403 15.9608   3
  -2   3  -2 106.992 15.8728   7
   3   2  -2 200.639 15.0990   1
   2  -3  -2 108.418 14.0673   7
  -2   3  -2 177.294 17.0731   2
   2  -3  -2 215.761 16.0601   2
  -3  -2  -2 119.429 16.5024   6
  -3  -2  -2 203.540 17.1529   1
   3   2  -2 221.548 15.0172   1
  -2   3  -2 174.647 16.5809   3
   2  -3  -2 245.750 17.1819   1
  -3  -2  -2 151.913 16.6427   3
   3   2  -1 112989. 10081.5   5
  -3  -2  -1 107584. 10081.0   1
  -3  -2  -1 108121. 10080.9   4
  -2   3  -1 111631. 10080.9   4
  -3  -2  -1 110304. 10081.3   6
  -2   3  -1 110681. 10081.1   5
  -3  -2  -1 109947. 10080.8   5
   2  -3  -1 98554.9 10080.9   3
   2  -3  -1 110946. 10080.8   2
   3   2  -1 109056. 10080.6   2
  -3  -2  -1 108814. 10081.0   7
   3   2  -1 109444. 10080.8   6
  -3  -2  -1 115142. 10081.5   3
  -2   3  -1 109356. 10081.4   2
  -2   3  -1 111254. 10081.1   7
   2  -3  -1 111156. 10081.1   1
  -2   3  -1 109098. 10081.0   6
  -3  -2  -1 105298. 10081.2   2
   2  -3  -1 106990. 10080.4   7
   2  -3  -1 107231. 10080.7   5
  -2   3  -1 110154. 10081.0   3
   3   2  -1 111576. 10081.1   8
   3   2  -1 107329. 10080.9   3
   2  -3  -1 110230. 10081.1   6
  -2   3  -1 109536. 10081.1   3
  -2   3  -1 109017. 10080.7   8
   2  -3  -1 113037. 10081.5   8
  -3  -2   0 279.166 25.1787   3
   2  -3   0 339.258 24.7407   2
  -3  -2   0 364.995 24.7130   2
   2  -3   0 262.488 24.7805   4
   3   2   0 360.110 24.8697   2
  -2   3   0 214.420 24.4759   6
   2  -3   0 229.423 24.3513   6
  -2   3   0 243.813 24.3021   5
  -3  -2   0 207.289 24.9341   7
   3   2   0 265.673 25.0887   5
   3   2   0 235.791 24.2953   6
  -3  -2   0 218.616 24.3362   6
  -2   3   0 397.403 25.4488   1
  -3  -2   0 242.581 24.7590   4
   2  -3   0 228.451 24.3015   5
  -2   3   0 216.047 23.9907   7
   3   2   0 260.609 24.9375   4
   3   2   0 224.938 25.0396   7
   2  -3   0 226.958 24.0509   7
   2  -3   0 238.570 24.6523   8
  -2   3   0 256.321 23.9970   3
   3   2   0 248.147 25.8549   3
  -2   3   0 218.719 24.5489   4
  -2   3   0 212.181 24.6025   8
   3   2   0 231.485 25.1975   5
  -3  -2   0 243.115 24.7043   8
   2  -3   0 234.091 23.9862   3
  -2   3   0 335.754 24.6747   2
  -3  -2   1 107198. 10039.5   6
  -3  -2   1 111651. 10040.0   8
   2  -3   1 109850. 10039.8   6
   3   2   1 108592. 10040.1   2
   3   2   1 108557. 10039.9   1
   2  -3   1 108761. 10040.0   7
  -2   3   1 107404. 10039.7   2
   2  -3   1 110701. 10040.3   2
   2  -3   1 112627. 10039.4   8
  -2   3   1 111234. 10039.4   3
  -3  -2   1 107608. 10039.8   3
  -3  -2   1 108757. 10039.4   2
   3   2   1 104012. 10040.0   3
  -2   3   1 108615. 10040.0   1
  -2   3   1 106847. 10039.2   7
   3   2   1 108887. 10039.6   5
   3   2   1 106470. 10040.0   6
   2  -3   1 109940. 10039.8   4
   3   2   1 111126. 10039.9   7
  -2   3   1 105863. 10039.6   5
   3   2   1 107113. 10039.6   4
   3   2   2 114.430 14.3012   7
   3   2   2 184.527 16.5807   2
   3   2   2 106.900 15.2409   8
  -2   3   2 283.496 17.5432   1
   2  -3   2 103.493 12.7416   8
  -3  -2   2 111.208 14.4135   8
   3   2   2 117.554 13.3228   5
  -3  -2   2 138.736 16.0842   4
   3   2   2 220.893 16.3553   1
  -3  -2   2 125.255 13.6904   6
  -3  -2   2 141.773 15.5334   3
   2  -3   2 109.266 13.7339   4
   3   2   2 126.115 13.4634   4
  -2   3   2 150.522 15.2988   4
   2  -3   2 110.148 16.0092   5
  -2   3   2 124.205 14.2367   5
  -3  -2   2 111.714 15.6376   7
   2  -3   2 105.373 13.9038   6
   2  -3   2 184.427 15.9039   3
  -3  -2   2 188.390 14.5680   2
  -2   3   2 212.305 15.6482   2
  -2   3   2 157.152 14.3439   3
  -3  -2   3 51582.6 4705.91   8
   3   2   3 50393.6 4704.78   4
  -2   3   3 51779.1 4706.01   3
   2  -3   3 47417.9 4706.25   3
   2  -3   3 50271.8 4705.17   4
   2  -3   3 49864.9 4704.87   8
   3   2   3 49076.5 4706.52   1
   3   2   3 50272.6 4705.78   7
   2  -3   3 51427.7 4706.52   5
  -3  -2   3 51807.5 4705.51   6
  -2   3   3 49603.8 4706.62   1
  -3  -2   3 50927.9 4706.66   5
  -3  -2   3 56362.3 4706.81   7
  -2   3   3 50448.7 4705.98   2
  -2   3   3 51872.0 4706.54   8
  -2   3   3 53503.4 4705.28   7
   3   2   3 50360.0 4705.14   5
  -2   3   3 52667.5 4706.68   6
   2  -3   3 52066.6 4705.59   6
  -3  -2   3 48861.3 4706.33   4
   3   2   4 1999.31 107.694   1
   2  -3   4 1040.64 103.706   6
  -3  -2   4 1158.78 105.439   5
   2  -3   4 1092.18 104.971   5
  -2   3   4 1388.66 105.070   3
   2  -3   4 1064.85 102.708   4
  -2   3   4 1612.44 105.451   2
  -2   3   4 1814.68 107.257   1
  -3  -2   4 986.895 103.543   6
   3   2   4 1038.93 103.113   5
   2  -3   4 968.589 102.533   8
   2  -3   4 950.316 104.839   7
  -3  -2   4 1059.14 103.745   8
   3   2   4 985.776 102.143   4
   2  -3   4 1275.34 105.479   3
  -2   3   4 1099.72 103.399   7
   3   2   4 1037.15 103.957   7
  -3  -2   4 1129.11 105.482   7
  -2   3   4 930.126 104.887   6
  -3  -2   4 1064.04 104.319   4
  -2   3   5 2745.86 267.090   6
   3   2   5 2840.45 267.363   2
  -2   3   5 2931.67 265.695   7
   3   2   5 2769.81 266.092   7
   2  -3   5 2755.28 266.900   5
  -2   3   5 2789.71 265.334   5
  -3  -2   5 2833.82 266.320   4
  -3  -2   5 2984.69 266.818   3
  -2   3   5 2902.90 266.831   3
   2  -3   5 2799.26 264.607   4
  -3  -2   5 2906.30 265.776   8
   3   2   5 2711.31 265.232   5
   3   2   5 2651.02 267.195   1
  -3  -2   5 3012.31 267.383   7
   2  -3   5 2827.08 267.271   7
  -3  -2   5 3130.43 267.516   5
  -3  -2   5 2857.50 265.868   6
  -2   3   5 3056.27 266.640   2
  -2   3   5 2797.44 267.449   1
   2  -3   6 100.733 21.1825   5
   3   2   6 161.156 22.4358   2
   2  -3   6 93.4563 13.8318   4
  -3  -2   6 111.705 16.7470   8
  -2   3   6 94.3600 16.5507   5
  -2   3   6 152.781 23.3999   1
  -3  -2   6 90.5828 21.2401   5
   3   2   6 100.936 16.7054   5
   3   2   6 127.452 19.6673   7
  -2   3   6 138.450 20.9560   3
  -3  -2   6 96.2047 21.8205   7
   2  -3   6 111.301 21.9753   7
  -2   3   6 76.4747 17.6761   7
  -2   3   6 150.101 19.8263   2
  -3  -2   6 101.106 17.6447   4
   3   2   6 100.349 22.5580   3
  -3  -2   6 136.201 20.7762   3
  -2   3   7 587.298 54.0904   7
   3   2   7 523.564 56.4628   2
  -2   3   7 503.335 56.2040   1
  -3  -2   7 563.188 56.3281   7
  -3  -2   7 531.164 55.8434   3
   2  -3   7 522.293 51.2973   4
  -2   3   7 503.162 52.9394   5
   3   2   7 490.148 56.7274   3
  -3  -2   7 492.923 53.7938   4
  -3  -2   7 590.518 56.7513   5
   2  -3   7 472.952 56.0942   7
  -2   3   7 524.563 54.9608   2
   3   2   7 592.720 53.6180   5
   3   2   7 490.981 54.9972   7
   2  -3   7 568.975 56.8784   5
  -2   3   7 536.997 56.1190   3
  -2   3   8 213.577 28.7393   5
  -3  -2   8 194.904 33.6491   5
   2  -3   8 240.033 35.1798   7
   3   2   8 206.354 29.2094   5
  -2   3   8 319.616 33.8796   2
   3   2   8 192.317 31.2336   7
   3   2   8 213.119 35.6590   3
  -2   3   8 310.981 35.4549   1
  -3  -2   8 270.834 34.0404   3
   3   2   8 347.860 35.9141   2
   2  -3   8 246.374 34.7117   5
  -2   3   8 229.091 31.1908   7
   2  -3   8 208.565 25.0556   4
  -2   3   8 295.249 34.3396   3
  -3  -2   8 158.471 34.2987   7
  -3  -2   8 181.290 28.8184   4
  -3  -2   9 80.6703 28.2108   3
  -3  -2   9 12.8061 25.9893   5
  -2   3   9 63.6104 24.8958   2
   3   2   9 37.9950 30.9066   3
  -2   3   9 64.6675 27.3370   3
   3   2   9 52.5738 26.4588   7
   2  -3   9 46.0373 29.2667   5
   3   2   9 133.358 31.2156   2
  -3  -2   9 59.5026 22.1977   4
  -2   3   9 38.9441 23.7903   7
  -3  -2   9 55.1997 29.3128   7
  -2   3   9 19.2495 28.3362   1
  -2   3   9 49.6265 19.6397   5
   3   2   9 19.4301 21.3599   5
   2  -3   9 4.73800 29.3651   3
   2  -3   9 84.7570 31.2110   7
  -2   3  10 110.633 30.5931   1
  -3  -2  10 89.0857 31.3009   7
   3   2  10 109.935 33.6076   3
  -3  -2  10 57.2692 22.2985   4
  -2   3  10 48.2882 26.3902   7
   3   2  10 80.7442 26.8720   7
  -3  -2  10 74.3633 29.3089   5
  -3  -2  10 120.861 29.6028   3
  -2   3  10 132.521 30.3476   3
   3   2  10 89.7478 30.3077   2
   2  -3  10 55.3331 31.0711   7
  -2   3  10 137.167 28.7836   2
   2  -3  10 89.4997 29.2886   5
   2  -3  10 90.5336 33.0639   3
   3   2  11-2.89057 26.1104   2
  -2   3  11 19.3997 27.6882   3
   2  -3  11 2.98601 28.2856   3
   3   2  11 19.5686 25.1370   7
  -2   3  11 17.4144 22.9758   7
  -2   3  11 2.51850 23.9907   2
   2  -3  11 5.86734 25.9487   7
  -3  -2  11-13.7385 28.4867   7
  -3  -2  11 51.7973 28.7015   3
  -3  -2  11 7.57630 25.6550   5
   2  -3  11-5.29065 28.6818   5
   3   2  11 43.5310 30.8357   3
   3   2  12-3.38975 31.2185   3
   2  -3  12 5.75592 28.8704   5
   3   2  12-15.7719 30.2568   2
   2  -3  12 26.3224 31.2301   3
  -3  -2  12-16.2625 26.0661   5
   3   2  12-19.0366 28.9206   7
  -2   3  12-15.2919 29.2594   3
   2  -3  12-45.0507 32.4339   7
  -3  -2  12 24.2714 29.8497   7
  -2   3  12 33.1239 26.6832   2
  -3  -2  12 24.1731 29.7288   3
  -2   3  13 69.9359 31.6954   3
  -3  -2  13 29.1042 34.8976   7
   3   2  13 3.66491 32.4914   3
   3   2  13-17.8468 32.2312   7
  -2   3  13-3.00741 27.9334   2
   2  -3  13-45.6940 35.1778   7
   3   2  13-30.7415 31.7251   2
   2  -3  13 46.8096 34.8087   3
   3   2  14 39.5385 37.7313   3
  -2   3  14-39.6080 35.8662   3
   2  -3  14-23.4501 34.0125   3
  -3  -2  14-44.8597 37.0875   7
   2  -3  14 60.9546 37.7631   7
  -2   3  15-3.85706 35.3726   3
   3   2  15 50.5585 38.4089   3
   2  -3  15 28.3712 38.5168   7
   2  -3  15 12.5722 38.0942   3
   3  -3 -15-34.8136 35.9558   6
  -3  -3 -15-7.27826 36.6404   6
  -3  -3 -15-32.9431 43.2598   1
  -3   3 -15 19.6775 40.4798   1
   3   3 -15-29.8732 38.2224   3
   3  -3 -15-33.1803 36.5908   1
  -3   3 -15 4.50570 36.2880   2
   3   3 -15-42.0011 36.5942   1
   3  -3 -14 36.6025 32.3416   6
   3   3 -14-32.5053 40.1823   3
  -3   3 -14 94.9410 40.2098   1
   3  -3 -14 15.4907 33.0625   1
   3   3 -14 21.6828 31.7537   2
   3   3 -14-34.9087 34.8125   1
  -3   3 -14-76.3959 40.1859   2
   3  -3 -14 44.6034 29.7656   2
  -3  -3 -14 26.2049 34.7463   1
  -3  -3 -14 23.9443 33.4980   6
   3  -3 -13-9.47275 30.6056   6
   3   3 -13 14.1203 32.3307   1
  -3   3 -13-61.1219 33.8527   1
  -3   3 -13 19.6966 33.2906   2
   3   3 -13-6.78945 30.4634   2
  -3  -3 -13 8.00302 36.6473   1
   3  -3 -13-26.9283 28.1518   8
  -3  -3 -13-19.1100 32.6319   6
   3  -3 -13 28.7661 30.8937   1
   3   3 -13 26.7968 34.4535   3
  -3  -3 -12 13.4963 23.8189   8
  -3   3 -12 18.2612 32.6106   1
  -3  -3 -12 50.0394 30.2622   6
   3  -3 -12-7.84713 25.6540   8
   3   3 -12-3.18766 28.0418   1
   3  -3 -12 33.1369 29.3272   1
  -3   3 -12 58.8953 33.1615   2
  -3   3 -12 4.63463 22.6822   6
  -3  -3 -12 3.64598 33.8969   1
   3  -3 -12 35.6725 27.0327   6
   3   3 -12 18.8771 28.7704   2
   3   3 -12 3.56766 30.5874   3
   3  -3 -11 9.96301 25.5193   8
  -3   3 -11 17.0210 30.2729   2
  -3  -3 -11 2.09352 21.5972   8
   3  -3 -11-2.75660 27.5902   6
  -3  -3 -11-5.37469 27.2170   6
   3   3 -11-10.1965 20.4619   6
  -3   3 -11-13.0579 29.1185   1
  -3   3 -11 12.5618 20.3979   6
   3   3 -11 22.8745 24.4066   1
   3   3 -11 14.3548 25.5321   2
  -3  -3 -10 26.7743 26.4947   6
  -3   3 -10 52.4500 32.6821   2
  -3  -3 -10-1.92764 22.8961   8
   3  -3 -10-3.18932 18.6882   4
  -3   3 -10 60.3191 28.8951   1
  -3   3 -10-27.9851 20.7623   6
   3   3 -10 36.3383 27.0847   2
   3   3 -10 1.54204 18.2923   8
   3  -3 -10-2.51342 26.6857   6
   3   3 -10 20.2174 25.7847   1
   3  -3 -10 23.4305 24.8259   8
   3   3 -10 12.8561 21.4424   6
  -3  -3  -9 38.7654 25.4062   8
   3   3  -9 20.5752 28.7265   2
   3   3  -9-12.7676 19.9158   8
  -3   3  -9-2.76829 32.7089   2
  -3   3  -9 40.4585 29.8296   1
   3  -3  -9 2.29315 28.7707   6
  -3  -3  -9 46.1012 27.2922   6
   3   3  -9 57.1993 22.3119   6
   3  -3  -9 13.1215 26.1134   8
   3  -3  -9 14.8911 19.9397   4
  -3   3  -9 13.2262 22.4253   6
   3   3  -9 6.60055 26.0052   1
  -3   3  -9-15.8327 15.4643   8
   3   3  -8 37.2696 18.8944   6
  -3  -3  -8 32.4846 9.65107   4
   3  -3  -8 26.1601 23.9820   8
  -3   3  -8 46.7029 13.7963   8
  -3   3  -8 34.2524 28.2385   2
  -3   3  -8 31.9987 18.5148   6
   3   3  -8 39.9287 23.3109   2
   3  -3  -8 72.3564 24.9929   6
   3   3  -8 58.7916 22.2533   1
  -3  -3  -8 30.2820 19.7295   8
   3   3  -8 52.0183 16.7701   8
  -3   3  -8 33.1124 23.7788   1
  -3  -3  -8 74.5248 24.3530   6
   3  -3  -8 42.6402 17.0015   4
   3   3  -7 136.469 21.5138   2
   3  -3  -7 87.8092 16.8409   4
  -3   3  -7 115.096 24.1219   2
   3   3  -7 129.941 19.9851   1
  -3  -3  -7 58.3143 10.8042   4
  -3  -3  -7 97.2007 22.0777   6
   3  -3  -7 65.2179 20.0894   8
  -3  -3  -7 88.3362 11.0401   4
  -3   3  -7 76.1735 17.2991   6
  -3   3  -7 81.0646 10.5768   4
  -3   3  -7 51.1068 12.7270   8
  -3  -3  -7 96.9223 19.5179   8
   3   3  -7 37.5375 15.9319   6
  -3   3  -7 177.680 23.5930   1
   3   3  -7 70.3175 15.4643   8
  -3   3  -6 907.713 86.3309   4
  -3  -3  -6 1026.52 90.1852   8
  -3   3  -6 891.730 92.0883   2
  -3  -3  -6 868.073 86.5782   4
  -3   3  -6 947.958 88.9195   6
   3  -3  -6 927.642 91.0916   8
  -3  -3  -6 937.781 91.0256   6
  -3   3  -6 940.693 87.2250   8
  -3  -3  -6 911.131 86.8917   5
   3   3  -6 962.054 88.8864   6
   3   3  -6 885.447 89.9995   1
   3  -3  -6 912.510 89.1922   4
   3   3  -6 948.413 90.7307   2
  -3  -3  -6 932.175 86.5636   4
  -3   3  -5 129.697 16.3518   8
  -3  -3  -5 129.232 15.7912   5
   3  -3  -5 123.127 20.0012   4
   3   3  -5 134.898 17.5105   6
   3   3  -5 179.275 23.8421   3
  -3  -3  -5 137.356 15.9308   4
   3  -3  -5 157.649 20.1826   5
  -3   3  -5 151.059 15.5740   4
  -3   3  -5 140.459 19.2144   6
   3   3  -5 266.582 21.6672   1
  -3  -3  -5 130.616 21.1022   8
   3   3  -5 125.956 18.5320   6
   3   3  -5 234.055 22.6378   2
  -3  -3  -5 131.362 22.6114   6
   3   3  -4 16015.5 1467.22   8
  -3   3  -4 15383.7 1466.43   4
  -3   3  -4 15959.1 1467.74   6
   3   3  -4 15591.5 1468.10   2
  -3  -3  -4 16146.2 1466.61   4
   3  -3  -4 15467.9 1468.04   4
  -3  -3  -4 15914.5 1466.42   5
   3  -3  -4 15776.4 1467.69   5
   3   3  -4 15642.6 1467.79   1
   3  -3  -4 15786.5 1467.41   5
  -3   3  -4 15943.3 1466.65   8
   3  -3  -4 15925.1 1467.24   7
   3   3  -4 16508.1 1466.94   6
   3   3  -4 15646.1 1468.63   3
  -3  -3  -4 15821.3 1468.27   8
  -3   3  -3 895.611 66.0529   2
   3   3  -3 610.308 62.4815   6
   3  -3  -3 702.381 63.3735   3
   3   3  -3 889.332 64.4504   2
   3  -3  -3 925.869 64.0747   2
   3  -3  -3 511.591 62.6843   7
  -3  -3  -3 617.342 62.6302   4
  -3   3  -3 614.296 62.5346   8
  -3   3  -3 694.130 62.5421   4
  -3   3  -3 603.549 63.6347   6
   3  -3  -3 631.332 63.2937   5
   3  -3  -3 575.722 64.0399   4
   3  -3  -3 612.216 63.2977   5
   3   3  -3 989.963 64.1296   1
   3   3  -3 587.744 63.0281   8
   3   3  -3 1037.56 64.4017   1
   3   3  -3 700.551 64.5768   3
  -3  -3  -3 609.871 62.2541   5
  -3  -3  -3 644.526 63.1186   7
  -3  -3  -3 641.989 64.2525   8
   3   3  -2 6507.53 588.338   6
  -3  -3  -2 6308.61 589.567   2
   3  -3  -2 6164.49 588.510   7
  -3   3  -2 6384.65 589.921   2
  -3   3  -2 6467.28 589.285   6
   3   3  -2 6085.86 588.793   1
  -3   3  -2 6456.59 588.590   8
  -3   3  -2 6436.25 588.583   4
  -3   3  -2 6323.56 589.910   1
  -3  -3  -2 6447.57 589.470   1
   3   3  -2 6397.91 589.528   4
   3  -3  -2 6246.14 588.906   5
   3  -3  -2 6375.92 588.776   2
  -3  -3  -2 6202.12 588.812   7
  -3   3  -2 6510.53 589.427   3
   3  -3  -2 5969.70 589.503   4
   3  -3  -2 6135.96 588.525   3
  -3  -3  -2 6816.68 588.787   4
  -3  -3  -2 6317.85 589.586   6
   3   3  -2 6361.10 588.893   8
   3  -3  -2 6433.62 589.169   1
   3   3  -2 6369.71 588.951   2
  -3  -3  -2 6397.25 588.356   5
  -3   3  -2 6461.12 589.365   7
   3   3  -2 6350.40 589.378   3
   3   3  -1 108.150 10.1681   2
  -3   3  -1 131.504 12.2687   1
  -3  -3  -1 79.4377 10.5855   7
  -3   3  -1 124.552 12.2410   2
  -3  -3  -1 85.1452 10.8272   4
   3   3  -1 74.8734 11.9489   5
  -3  -3  -1 149.561 11.2843   1
  -3  -3  -1 86.5525 11.2188   6
   3   3  -1 69.3734 10.1725   8
  -3  -3  -1 127.244 11.9853   2
  -3   3  -1 95.1488 10.4454   4
   3  -3  -1 62.7109 10.3890   5
   3  -3  -1 71.0304 11.4890   8
   3   3  -1 77.5451 11.2500   7
   3   3  -1 112.799 9.40626   1
  -3   3  -1 103.633 10.3629   3
  -3   3  -1 81.1758 10.7213   7
   3  -3  -1 129.311 11.1105   1
  -3   3  -1 76.0946 10.8600   6
   3   3  -1 91.6431 11.2872   3
  -3   3  -1 86.5176 11.8000   8
   3   3  -1 67.3305 9.28684   6
   3  -3  -1 79.7640 10.6797   6
   3  -3  -1 112.954 9.90864   2
   3  -3  -1 67.8692 9.42217   3
   3  -3  -1 72.8409 9.67123   7
  -3  -3  -1 64.9432 10.8987   8
  -3  -3  -1 100.971 14.2026   3
  -3   3   0 124978. 10531.4   4
  -3   3   0 122086. 10531.5   8
   3  -3   0 125104. 10530.6   3
   3  -3   0 126274. 10531.4   8
  -3   3   0 123193. 10531.2   1
  -3   3   0 53502.5 10530.2   3
   3   3   0 123223. 10531.2   8
   3  -3   0 121477. 10531.2   1
   3  -3   0 127597. 10531.4   4
   3   3   0 126622. 10531.4   5
  -3  -3   0 124256. 10531.0   6
  -3  -3   0 126438. 10531.4   5
   3  -3   0 128657. 10531.4   6
  -3  -3   0 128399. 10531.1   2
   3   3   0 122749. 10531.4   4
   3   3   0 125191. 10531.2   2
  -3  -3   0 121014. 10531.5   4
   3   3   0 123020. 10530.7   1
  -3   3   0 122970. 10531.3   6
   3   3   0 100911. 10531.6   3
  -3  -3   0 131019. 10531.4   3
   3   3   0 126133. 10531.0   6
  -3  -3   0 123751. 10531.3   8
   3  -3   0 123745. 10531.0   7
   3   3   0 125018. 10531.4   7
   3  -3   0 118521. 10531.2   5
  -3   3   0 123733. 10531.1   5
  -3   3   0 123845. 10531.0   2
   3  -3   0 121239. 10531.2   2
  -3   3   0 124890. 10530.9   7
  -3  -3   0 133738. 10530.6   1
   3  -3   1 78.2832 10.0624   6
  -3   3   1 115.851 10.8564   1
  -3  -3   1 81.4264 11.9909   5
   3  -3   1 124.088 11.3653   2
   3   3   1 83.6104 9.84321   4
   3   3   1 103.582 11.2387   2
   3  -3   1 109.292 11.6499   1
   3   3   1 68.8086 10.1977   7
   3  -3   1 74.2666 9.63756   4
  -3  -3   1 85.5302 9.31058   2
  -3  -3   1 55.2778 9.66327   8
  -3  -3   1 97.2753 8.88129   1
  -3   3   1 69.4092 11.5570   8
  -3  -3   1 67.3086 8.59508   6
  -3  -3   1 61.4532 9.90970   3
  -3   3   1 59.0965 9.06356   7
   3  -3   1 74.5717 9.22327   8
   3   3   1 122.084 10.5971   1
   3  -3   1 79.2087 10.2353   7
  -3   3   1 68.1955 9.88557   5
   3   3   1 87.0001 9.82674   5
   3  -3   1 100.564 9.96777   3
   3   3   1 73.9379 10.6024   6
   3   3   1 65.3200 9.33050   5
  -3   3   1 96.8956 9.69194   2
   3   3   2 6157.20 580.988   8
   3  -3   2 6095.05 581.096   7
  -3   3   2 6326.41 580.289   3
   3   3   2 5610.48 581.165   2
   3  -3   2 6490.17 580.024   8
  -3  -3   2 6361.81 580.582   8
  -3   3   2 6293.75 580.654   5
   3  -3   2 6348.21 581.281   2
  -3  -3   2 6405.19 580.733   2
  -3  -3   2 6081.01 579.869   6
  -3   3   2 6319.43 580.517   2
   3   3   2 6117.55 581.168   1
   3  -3   2 6526.22 580.251   4
   3   3   2 6254.15 580.423   7
   3  -3   2 6408.78 580.655   6
  -3   3   2 6423.71 581.178   4
   3  -3   2 6210.57 580.907   3
  -3  -3   2 6374.67 581.043   3
   3   3   2 6259.69 581.215   6
   3  -3   2 6480.86 581.101   5
   3   3   2 6309.95 580.249   4
   3   3   2 5961.88 579.805   5
  -3   3   2 6253.47 581.114   1
  -3  -3   2 6522.11 581.327   4
  -3  -3   2 6375.34 580.269   1
  -3  -3   3 610.097 61.6764   8
  -3  -3   3 637.537 63.5305   5
  -3  -3   3 868.366 62.8076   2
  -3  -3   3 588.840 63.2273   7
   3  -3   3 610.963 61.8538   6
   3  -3   3 785.300 63.1413   3
  -3   3   3 1006.22 62.8522   2
   3  -3   3 628.011 60.8884   8
   3   3   3 426.905 60.4573   5
  -3   3   3 651.987 63.2465   8
   3   3   3 604.500 61.7136   7
   3   3   3 1088.28 64.8658   1
  -3   3   3 1055.30 64.5204   1
  -3   3   3 815.651 62.3343   3
  -3   3   3 615.347 63.0150   6
   3  -3   3 682.498 61.0062   4
   3   3   3 656.826 60.9906   4
   3  -3   3 704.442 63.2493   5
  -3  -3   3 646.060 62.8439   4
  -3  -3   3 603.931 61.1449   6
  -3   3   4 15228.6 1422.83   8
  -3  -3   4 16438.3 1421.51   6
   3   3   4 15457.3 1421.80   7
  -3  -3   4 16500.1 1421.77   8
  -3   3   4 15158.9 1422.90   1
   3  -3   4 15173.2 1422.84   7
  -3   3   4 15053.1 1422.01   2
   3  -3   4 12342.1 1420.56   4
  -3  -3   4 17073.7 1423.37   7
  -3  -3   4 15954.7 1423.24   5
  -3   3   4 17904.0 1421.68   7
  -3  -3   4 16012.4 1422.58   4
  -3   3   4 15860.3 1423.08   6
   3  -3   4 16058.0 1422.82   5
   3   3   4 14046.9 1422.64   3
   3   3   4 15731.9 1420.98   5
   3  -3   4 15684.7 1421.01   8
  -3   3   4 15832.5 1422.23   3
   3   3   4 15369.7 1420.79   4
   3  -3   5 122.009 22.0735   5
  -3   3   5 158.247 22.3067   8
  -3   3   5 289.978 24.3085   1
  -3   3   5 234.732 21.3404   2
  -3   3   5 141.512 23.5224   6
   3  -3   5 123.895 17.0525   8
   3  -3   5 164.780 22.4615   3
   3   3   5 107.000 16.8393   5
   3   3   5 214.369 24.2942   2
  -3  -3   5 163.385 24.0507   7
   3   3   5 238.913 24.7033   1
  -3  -3   5 140.848 18.0713   8
  -3  -3   5 150.126 24.2542   5
   3   3   5 118.288 15.7634   4
  -3   3   5 204.176 21.1298   3
   3   3   5 148.384 23.5477   3
   3  -3   5 125.739 22.3007   7
  -3   3   5 110.821 18.7293   7
  -3  -3   5 141.849 20.6563   4
   3   3   5 148.696 19.4640   7
   3  -3   6 908.956 92.2106   7
   3   3   6 923.730 92.2926   2
   3   3   6 983.356 90.3467   7
  -3   3   6 964.236 89.5491   5
  -3  -3   6 851.273 90.0134   4
  -3   3   6 861.566 91.8791   6
   3  -3   6 896.646 91.9599   3
   3  -3   6 1061.60 92.1085   5
  -3   3   6 1030.49 90.1918   7
   3   3   6 899.317 88.7392   5
  -3  -3   6 983.857 92.3771   7
   3  -3   6 888.447 88.4724   8
  -3  -3   6 871.429 88.9897   8
  -3   3   6 944.248 91.1629   3
   3   3   6 954.272 92.6195   3
  -3   3   6 955.177 90.8373   2
  -3   3   6 928.469 91.7094   1
  -3  -3   6 974.866 92.5230   5
  -3  -3   7 102.772 21.3585   5
  -3  -3   7 112.135 21.2774   7
   3  -3   7 88.8068 21.1443   7
   3   3   7 56.4487 14.9497   7
   3  -3   7-6.62320 5.41077   4
   3   3   7 77.6447 13.6903   5
  -3   3   7 82.1790 17.1641   7
   3   3   7 169.410 22.9460   2
  -3  -3   7 83.1859 15.6680   4
   3  -3   7 91.0949 20.3793   5
  -3   3   7 106.705 19.5225   3
   3   3   7 78.7913 21.0760   3
  -3   3   7 143.504 20.5605   1
  -3   3   7 99.7635 16.8611   2
  -3  -3   7 130.879 21.0081   3
  -3   3   7 74.7106 14.3648   5
   3   3   8 21.4617 23.8968   2
  -3   3   8 69.6010 20.9242   7
  -3  -3   8 39.5670 23.4926   3
  -3   3   8 29.2613 20.2174   2
  -3   3   8 37.8293 23.5921   1
   3   3   8 11.3691 25.1402   3
  -3  -3   8 63.5311 23.3232   5
   3  -3   8 40.1349 23.6007   5
   3   3   8 38.0993 17.0438   5
  -3   3   8 41.4507 22.3038   3
  -3  -3   8 33.7503 17.5722   4
   3   3   8 37.0904 19.6595   7
  -3   3   8 29.2557 17.2390   5
  -3  -3   8 32.9049 25.2363   7
   3  -3   8 57.1232 25.3199   7
   3   3   9 20.3165 23.2373   7
  -3  -3   9 40.4946 21.5515   4
   3   3   9-5.37189 18.7464   5
  -3  -3   9 53.1735 31.1646   7
   3  -3   9 34.9051 28.7025   5
  -3   3   9 13.7944 23.7175   2
  -3   3   9-21.4904 27.9600   3
  -3  -3   9-13.6815 28.4659   5
  -3   3   9 11.7855 23.6105   7
   3  -3   9 33.2763 30.0791   7
   3   3   9-16.8700 29.2875   2
  -3   3   9-9.51267 27.7040   1
  -3  -3   9 2.15503 27.9583   3
   3   3   9 17.9284 30.7173   3
  -3   3   9-11.4936 20.0774   5
   3   3  10-10.4565 22.7545   7
   3  -3  10 16.9022 26.2716   5
  -3   3  10-18.6640 25.9080   1
  -3  -3  10-7.74534 28.3731   7
  -3  -3  10 19.9547 26.1885   5
  -3  -3  10-28.1005 20.3465   4
  -3   3  10 14.5049 25.3818   3
   3  -3  10-18.7104 27.2586   7
  -3   3  10 6.62055 22.9684   2
  -3   3  10 4.81493 19.9706   5
   3   3  10-8.54015 28.0789   3
  -3   3  10 11.5768 25.5198   7
   3   3  10-18.8226 27.1682   2
  -3   3  11-37.8124 27.4161   3
  -3  -3  11 5.36214 24.5535   5
   3   3  11-56.3903 30.4397   3
   3  -3  11-14.7963 26.6323   7
   3  -3  11 63.5264 29.9107   3
  -3  -3  11 8.58278 29.0405   7
   3  -3  11 13.2207 25.4958   5
  -3   3  11 26.8122 26.6520   1
   3   3  11 2.94667 27.2159   2
  -3   3  11 9.74207 23.4240   2
   3   3  11-2.34613 23.9811   7
  -3   3  11 38.2405 24.1669   7
   3  -3  12-19.9573 31.1598   3
   3   3  12-15.9735 29.3513   2
  -3  -3  12 18.9092 32.1485   7
   3   3  12-10.2723 29.7119   3
   3  -3  12 5.73438 28.9114   5
   3  -3  12-16.3092 33.1193   7
  -3   3  12-5.31812 25.2529   2
  -3   3  12 32.8731 27.5359   3
  -3  -3  12 8.53883 28.2920   5
   3   3  12 83.4647 26.4267   7
   3  -3  13 3.63476 31.8275   3
   3   3  13-3.69923 32.9937   3
  -3   3  13-12.9950 30.8362   3
  -3  -3  13-6.87063 34.5440   7
  -3  -3  13-18.2951 30.1485   5
   3   3  13 31.0872 31.4506   2
  -3   3  13 40.8176 28.7566   2
   3  -3  13-56.7073 36.1421   7
   3   3  14-31.7426 36.6729   3
  -3   3  14 10.5423 34.5174   3
   3  -3  14 39.6236 36.9293   3
  -3  -3  14 10.8713 36.8095   7
   3  -3  14 30.6743 35.6387   7
   3   3  14 29.7278 33.3717   2
   3  -3  15 21.2756 42.0780   3
   3   3  15-25.3803 41.4183   3
  -3   3  15-3.77797 35.0959   3
   3  -3  15 4.11533 38.0155   7
  -3  -3  15-30.6046 38.6571   7
  -3  -4 -15-7.44044 36.2379   6
   3   4 -15-21.4795 38.0835   3
   4  -3 -15 16.1759 33.1234   1
  -4   3 -15 18.5961 39.6776   2
   3   4 -15 4.29713 36.0661   1
   4  -3 -14-3.77934 32.7913   1
  -3  -4 -14 3.51157 34.8989   6
  -4   3 -14-4.37854 37.9871   2
   3   4 -14 3.69118 32.4321   2
  -3  -4 -14 17.4984 35.5837   1
   3   4 -14-31.7551 36.6690   1
  -4   3 -14 69.0303 37.7027   1
   3   4 -14 61.5980 35.5149   3
   4  -3 -14-9.95174 31.3286   6
   3   4 -13-10.8215 33.5061   1
   4  -3 -13 15.7583 28.9495   6
  -3  -4 -13 8.06580 34.1965   1
   3   4 -13-10.4511 32.0889   2
  -4   3 -13-28.4093 36.7427   2
   4  -3 -13-46.7934 29.1533   8
  -3  -4 -13 3.28277 30.8307   6
  -4   3 -13-16.5715 33.9380   1
  -3  -4 -13 17.7051 27.1309   8
   3   4 -13 7.77277 34.8752   3
   4  -3 -13-3.51251 29.1838   1
   3   4 -12 26.0259 28.8525   2
   4  -3 -12 84.8614 27.9447   8
  -3  -4 -12 35.8800 26.3437   8
   4  -3 -12 32.3688 29.8236   1
  -4   3 -12 7.46735 31.9559   1
   3   4 -12-3.25367 30.1461   1
   4  -3 -12 11.8798 27.9917   6
  -4   3 -12 34.1152 33.3816   2
   3   4 -12 58.1294 33.8276   3
  -4   3 -12-2.39095 23.1786   6
   4  -3 -11 10.9060 26.8912   6
  -4   3 -11 23.6447 20.5643   6
   3   4 -11-17.3556 26.1077   1
  -4   3 -11 9.96076 28.0556   1
   3   4 -11 3.35268 31.0509   3
  -3  -4 -11 8.92282 23.4696   8
  -3  -4 -11 2.79119 26.9121   6
  -4   3 -11-7.00784 31.9031   2
   3   4 -11-20.8696 28.2223   2
   4  -3 -11-12.6978 24.4860   8
  -3  -4 -10-22.6843 22.9754   8
   3   4 -10 25.2909 19.1087   6
   3   4 -10 35.1020 27.5987   2
   4  -3 -10 5.02939 25.4664   6
  -3  -4 -10-27.9122 24.0856   6
   4  -3 -10-7.06802 18.1032   4
   3   4 -10 18.2966 30.8813   3
   4  -3 -10-21.6640 25.6534   8
  -4   3 -10-22.2265 29.3260   2
   3   4 -10-2.56264 25.8303   1
  -4   3 -10 8.84721 28.4352   1
  -4   3 -10-5.77592 20.5624   6
  -3  -4  -9 326.445 43.1561   8
   3   4  -9 302.350 38.7390   8
  -4   3  -9 391.891 43.1459   6
   3   4  -9 258.577 44.5999   1
   4  -3  -9 333.067 41.4919   4
   3   4  -9 315.946 46.9813   2
  -3  -4  -9 356.089 47.6788   6
   4  -3  -9 346.817 45.1356   8
  -4   3  -9 319.384 36.9432   8
   3   4  -9 357.253 50.9308   3
  -4   3  -9 390.387 53.2315   2
  -4   3  -9 392.300 50.6015   1
   3   4  -9 337.509 41.0081   6
   4  -3  -9 369.280 47.1292   6
   3   4  -8 182.558 31.0012   2
  -4   3  -8 131.009 25.8835   6
   3   4  -8 112.517 33.9646   3
   4  -3  -8 174.804 25.6243   4
  -4   3  -8 257.183 36.2383   2
   4  -3  -8 123.882 29.5329   8
   3   4  -8 191.029 24.9990   6
  -3  -4  -8 144.300 30.0454   6
   3   4  -8 126.587 23.1261   8
   3   4  -8 290.118 31.5252   1
  -3  -4  -8 164.369 19.4761   4
  -3  -4  -8 155.866 28.3407   8
  -4   3  -8 142.631 21.3190   8
  -4   3  -7 615.329 62.7511   8
   3   4  -7 693.527 64.2734   6
   4  -3  -7 652.348 65.2830   4
  -3  -4  -7 616.854 66.1150   8
   4  -3  -7 654.657 65.3524   5
   4  -3  -7 730.621 67.8916   8
  -4   3  -7 660.112 65.2762   6
   3   4  -7 720.436 68.9068   3
  -3  -4  -7 618.475 62.0459   4
  -3  -4  -7 560.851 67.1133   6
   3   4  -7 703.541 66.9815   2
   3   4  -7 685.385 66.3163   1
  -3  -4  -6 148.994 17.3492   4
   4  -3  -6 125.239 21.5951   4
   3   4  -6 228.816 24.7127   2
  -3  -4  -6 130.831 16.9438   4
   3   4  -6 245.921 23.8612   1
  -3  -4  -6 146.467 16.3468   5
  -4   3  -6 154.906 22.1979   6
  -3  -4  -6 165.532 24.4347   8
   3   4  -6 166.699 20.1427   6
   4  -3  -6 163.605 22.2603   5
  -4   3  -6 134.806 17.6882   8
   3   4  -6 150.404 26.2659   3
  -3  -4  -6 158.545 25.5777   6
  -4   3  -6 135.610 15.1174   4
  -3  -4  -5 1037.43 90.1185   5
  -3  -4  -5 1057.08 90.8841   4
   3   4  -5 983.573 92.8127   1
   3   4  -5 897.031 91.1249   8
   4  -3  -5 914.313 92.9606   4
   3   4  -5 953.487 91.0134   6
  -4   3  -5 995.852 90.9750   8
  -3  -4  -5 995.648 93.7777   8
  -4   3  -5 1106.16 92.9123   6
   3   4  -5 916.760 94.2846   3
  -4   3  -5 873.527 89.7887   4
   3   4  -5 902.136 93.3256   2
   3   4  -5 943.991 91.3644   6
   4  -3  -5 1002.80 92.6616   5
  -3  -4  -4 159.814 21.9801   8
   4  -3  -4 152.428 19.2975   7
  -4   3  -4 150.020 16.9979   4
   4  -3  -4 173.922 20.4099   5
   3   4  -4 156.936 18.3390   8
  -4   3  -4 268.315 24.1021   1
   4  -3  -4 272.888 20.6219   2
  -4   3  -4 152.269 20.0880   6
   3   4  -4 163.405 22.4649   3
   4  -3  -4 201.452 19.7036   3
  -4   3  -4 164.680 18.1028   8
   3   4  -4 259.993 21.6459   2
   3   4  -4 276.085 21.2576   1
   4  -3  -4 167.483 20.8042   4
   3   4  -4 158.741 17.6407   6
  -3  -4  -4 162.964 18.3678   4
  -4   3  -4 214.721 23.5006   2
  -3  -4  -4 149.413 16.8477   5
  -4   3  -3 17635.5 1598.10   8
   3   4  -3 17769.1 1598.13   8
  -3  -4  -3 17595.3 1598.13   4
  -3  -4  -3 16829.9 1597.34   5
  -4   3  -3 17305.0 1599.08   6
   3   4  -3 17837.6 1597.46   6
   4  -3  -3 17482.2 1598.19   2
   4  -3  -3 17632.1 1598.71   5
   4  -3  -3 17187.6 1599.29   4
  -4   3  -3 18021.1 1599.85   1
  -3  -4  -3 17525.1 1599.58   6
  -3  -4  -3 17592.0 1598.12   7
  -4   3  -3 17796.2 1599.85   2
   3   4  -3 17659.1 1599.30   3
  -4   3  -3 17447.6 1597.66   4
   4  -3  -3 16929.4 1598.09   3
   3   4  -3 17468.8 1598.69   1
   4  -3  -3 14941.5 1597.88   7
   4  -3  -3 17061.7 1598.52   5
   3   4  -3 17608.6 1598.89   2
  -3  -4  -2 206.286 24.3062   4
   4  -3  -2 352.867 25.2761   1
  -4   3  -2 387.627 26.7306   2
   3   4  -2 227.151 25.5455   3
  -4   3  -2 293.901 25.4349   3
  -4   3  -2 330.809 26.6713   2
   3   4  -2 283.957 24.7074   2
  -4   3  -2 210.947 23.6842   4
   4  -3  -2 248.335 23.4221   3
   3   4  -2 187.578 22.9126   6
  -3  -4  -2 366.640 26.2899   1
  -4   3  -2 203.803 24.0085   8
   3   4  -2 317.943 24.7009   1
   4  -3  -2 225.544 24.7942   5
  -3  -4  -2 205.301 24.2066   7
  -4   3  -2 211.898 25.2284   6
  -4   3  -2 338.286 27.1687   1
  -3  -4  -2 197.620 25.5996   6
   4  -3  -2 307.785 23.9010   2
   3   4  -2 215.764 23.8933   8
   4  -3  -2 203.689 23.9209   7
  -4   3  -1 89946.1 8169.50   2
   3   4  -1 86318.3 8169.33   7
  -4   3  -1 86318.6 8169.13   8
  -4   3  -1 88950.1 8169.46   6
   4  -3  -1 86259.3 8168.91   1
  -4   3  -1 89666.4 8168.87   3
   4  -3  -1 91005.1 8169.70   8
   4  -3  -1 84220.5 8169.25   6
   3   4  -1 86247.2 8168.85   2
  -3  -4  -1 90630.5 8169.40   8
  -4   3  -1 87710.8 8169.07   4
  -3  -4  -1 90271.0 8169.36   2
  -4   3  -1 89256.1 8169.11   7
   4  -3  -1 87659.6 8169.16   5
   3   4  -1 85554.1 8168.49   1
  -3  -4  -1 89325.5 8168.98   7
  -3  -4  -1 88361.1 8169.30   6
  -4   3  -1 88457.1 8169.48   1
   3   4  -1 90146.8 8168.92   8
   3   4  -1 91070.7 8168.38   6
   4  -3  -1 88396.3 8168.76   7
   4  -3  -1 87524.4 8168.51   2
  -3  -4  -1 90219.5 8168.99   1
  -3  -4  -1 88265.7 8169.26   4
   3   4  -1 88347.4 8169.66   5
   4  -3  -1 89405.6 8169.68   4
  -3  -4   0 2420.35 239.628   4
  -4   3   0 2129.53 239.137   5
   4  -3   0 2250.51 239.401   6
  -3  -4   0 2669.93 239.477   3
   4  -3   0 2283.44 239.462   4
   3   4   0 2081.90 239.234   7
   3   4   0 2133.93 238.849   6
  -4   3   0 3385.11 239.321   2
   3   4   0 2314.92 239.331   5
  -3  -4   0 3558.33 239.508   2
  -3  -4   0 2182.33 239.151   8
  -4   3   0 2883.80 238.490   3
  -4   3   0 3761.75 239.805   1
  -3  -4   0 2150.04 238.811   6
  -4   3   0 2078.07 239.276   6
  -4   3   0 2082.34 239.398   8
  -3  -4   0 2203.23 239.263   5
   4  -3   0 2099.98 238.904   7
   3   4   0 3759.93 239.282   1
   4  -3   0 3820.76 239.935   1
   3   4   0 2126.24 239.070   8
   3   4   0 3343.41 239.855   2
   3   4   0 2283.44 239.358   4
  -4   3   0 2184.00 238.905   7
   4  -3   0 2061.21 239.154   5
  -4   3   0 2340.30 239.406   4
  -3  -4   0 3928.07 239.089   1
   4  -3   0 3328.34 239.553   2
   4  -3   0 2240.58 239.356   8
   3   4   1 89328.2 6938.81   5
   4  -3   1 87740.2 6939.26   7
   3   4   1 89750.3 6939.08   4
  -3  -4   1 89003.1 6939.00   8
  -4   3   1 86183.4 6939.91   8
   3   4   1 89877.0 6939.28   1
   3   4   1 90619.2 6939.73   2
  -4   3   1 89091.6 6938.70   7
  -3  -4   1 85614.1 6939.13   3
  -3  -4   1 82645.5 6938.55   1
  -3  -4   1 87348.9 6938.78   2
   3   4   1 87939.5 6939.32   6
   4  -3   1 89062.4 6938.77   3
  -4   3   1 88916.6 6939.15   5
   4  -3   1 87437.9 6939.60   1
   4  -3   1 88434.5 6939.42   2
  -3  -4   1 86192.6 6939.72   5
   3   4   1 90801.4 6939.03   7
   3   4   1 87247.5 6939.36   8
   4  -3   1 90293.8 6939.45   6
   4  -3   1 90648.3 6938.96   4
   4  -3   1 90825.1 6939.04   8
   3   4   1 89697.0 6938.74   5
  -4   3   1 88417.1 6939.04   1
  -4   3   1 88559.1 6938.39   2
   4  -3   2 213.865 25.9201   7
   3   4   2 225.219 23.8989   5
  -4   3   2 216.366 26.3194   6
   4  -3   2 234.023 24.3600   8
  -3  -4   2 243.219 26.2577   4
   4  -3   2 229.478 25.3973   6
   3   4   2 202.854 24.6200   7
   3   4   2 242.242 24.7921   4
  -4   3   2 343.950 25.0406   2
  -3  -4   2 271.763 25.5307   2
   3   4   2 374.621 27.1721   1
   4  -3   2 288.226 25.7161   3
  -4   3   2 220.053 25.6438   5
  -3  -4   2 215.261 24.7415   8
   4  -3   2 213.195 25.6647   5
  -4   3   2 227.588 23.9147   3
   4  -3   2 219.776 24.3273   4
  -3  -4   2 347.698 25.1649   1
  -4   3   2 376.908 26.8245   1
  -3  -4   3 17592.8 85.5047   2
  -4   3   3 17402.5 91.6511   1
   3   4   3 17217.9 64.5473   4
   3   4   3 16979.6 69.9737   7
   4  -3   3 16862.0 87.1897   3
  -4   3   3 17004.1 96.5893   8
  -3  -4   3 17447.3 70.2260   8
   4  -3   3 17576.5 89.8680   5
   3   4   3 15655.9 88.9726   3
   3   4   3 16463.1 94.5903   1
   4  -3   3 17743.4 57.8557   4
   4  -3   3 17992.8 61.0935   8
  -4   3   3 17842.3 95.3219   6
  -3  -4   3 17597.2 91.4886   4
  -4   3   3 17320.3 72.1949   2
  -3  -4   3 17346.3 73.9325   1
  -4   3   3 17008.3 70.9487   3
   4  -3   4 213.086 15.0899   3
   4  -3   4-3.08614 1.91626   4
  -4   3   4 208.906 12.2203   3
  -3  -4   4 162.532 10.5718   8
  -4   3   4 160.873 16.2032   6
   3   4   4 150.572 8.29909   4
  -4   3   4 334.845 17.6614   1
   3   4   4 284.675 17.9932   1
   4  -3   4 132.654 14.8486   5
   4  -3   4 155.673 9.02499   8
  -3  -4   4 147.594 17.4287   5
   3   4   4 174.392 15.2597   3
  -4   3   4 169.019 15.4377   8
  -4   3   4 285.261 13.4876   2
  -3  -4   4 152.796 13.9354   4
  -3  -4   4 157.918 16.8015   7
   3   4   4 144.469 10.8605   7
   3   4   5 1019.77 36.3415   7
   4  -3   5 861.988 40.3824   3
   3   4   5 884.162 41.1738   3
   4  -3   5 916.654 33.5323   8
  -3  -4   5 992.924 42.7557   7
  -3  -4   5 899.213 38.0590   4
  -4   3   5 950.596 41.2777   6
  -3  -4   5 859.152 34.0263   8
  -4   3   5 970.380 36.6059   2
   3   4   5 1043.09 43.0516   2
  -4   3   5 950.531 37.4333   3
  -3  -4   5 868.998 42.1837   5
   3   4   5 906.219 41.7713   1
  -4   3   5 882.663 40.4177   1
  -4   3   5 843.355 39.5628   8
   4  -3   5 904.955 40.5868   7
  -4   3   5 1027.13 36.4146   7
   3   4   5 928.586 32.6932   4
   4  -3   5 932.518 39.6878   5
  -4   3   6 184.317 23.3510   3
  -4   3   6 231.660 23.3094   2
  -3  -4   6 133.548 19.7463   8
   3   4   6 134.165 21.3407   7
  -3  -4   6 165.266 27.3243   7
  -4   3   6 125.791 24.3953   8
   4  -3   6 156.681 25.4567   5
  -3  -4   6 140.861 23.0878   4
   4  -3   6 250.304 27.5002   3
   3   4   6 256.876 27.9109   2
  -4   3   6 140.608 26.3426   6
   3   4   6 149.608 19.3403   5
  -3  -4   6 173.075 27.7260   5
   4  -3   6 139.328 26.0362   7
   3   4   6 219.718 28.0350   1
  -4   3   6 145.915 21.5342   7
   3   4   6 221.416 28.0787   3
  -4   3   6 202.721 26.2126   1
  -3  -4   7 653.380 64.5724   4
  -4   3   7 643.991 64.8742   2
   3   4   7 723.754 67.9600   3
  -4   3   7 627.426 66.6740   6
  -3  -4   7 758.862 68.5606   7
   4  -3   7 665.979 66.5343   5
   3   4   7 632.838 67.2227   2
   4  -3   7 677.130 67.2556   7
  -4   3   7 670.651 64.1800   7
  -4   3   7 620.295 65.2588   3
  -4   3   7 647.920 66.6652   1
   3   4   7 585.965 64.2451   7
  -3  -4   7 581.825 67.0063   5
   4  -3   7 602.556 66.5865   3
   3   4   7 627.965 62.3250   5
  -3  -4   8 157.727 27.0322   4
  -3  -4   8 146.709 33.2577   7
  -4   3   8 275.786 34.1917   1
  -4   3   8 266.779 28.8894   2
  -3  -4   8 168.887 33.3502   5
  -4   3   8 248.960 30.7259   3
   3   4   8 232.729 35.1225   3
   4  -3   8 156.160 30.7015   5
   3   4   8 158.306 27.7391   7
   4  -3   8 201.658 33.6820   3
   3   4   8 150.614 23.7058   5
  -4   3   8 171.774 28.3943   7
   3   4   8 271.779 34.2207   2
   4  -3   8 144.469 32.0497   7
  -4   3   9 340.941 41.6587   7
  -4   3   9 325.494 45.3059   1
   4  -3   9 349.493 45.5877   5
  -3  -4   9 300.527 40.6710   4
   3   4   9 357.693 49.0236   3
   3   4   9 304.421 47.0291   2
  -3  -4   9 338.307 48.0436   7
   3   4   9 327.940 42.6898   7
   4  -3   9 345.198 48.1601   7
  -4   3   9 274.343 42.4064   2
  -4   3   9 324.609 43.9613   3
  -3  -4   9 359.446 47.9071   5
   3   4  10 46.4066 23.1154   7
  -3  -4  10 1.77828 19.1955   4
  -4   3  10 1.86684 21.0787   7
  -4   3  10-2.34536 24.6579   3
   3   4  10 27.2323 26.6925   2
  -4   3  10 48.5312 21.7546   2
  -3  -4  10-8.06942 26.8865   7
   4  -3  10 16.1916 25.9186   7
  -3  -4  10 15.7786 26.9722   5
  -4   3  10 2.64505 24.8722   1
   4  -3  10 38.5687 25.2862   5
   3   4  10-17.2890 28.5901   3
   3   4  11 29.4645 24.1156   7
  -3  -4  11 11.2738 26.9753   5
   4  -3  11-3.00279 28.7382   7
  -4   3  11-7.89154 26.5873   3
  -4   3  11-5.88902 27.2057   1
  -3  -4  11 32.7054 27.8536   7
  -4   3  11-8.29197 23.3734   7
   3   4  11 63.1127 29.4321   2
   4  -3  11 10.5387 26.5041   5
  -4   3  11 14.0197 23.0592   2
   3   4  11-22.1296 27.0806   3
   3   4  12 3.24180 28.8452   2
  -4   3  12-37.5979 29.5788   3
   4  -3  12 2.85100 27.6502   5
  -3  -4  12-3.01712 29.6293   5
  -3  -4  12-29.4282 32.5041   7
   4  -3  12 19.7557 30.2563   7
  -4   3  12-17.9773 24.2688   2
   3   4  12-17.2658 33.7373   3
  -4   3  13 15.8136 29.7212   3
   4  -3  13-3.59600 32.8571   7
  -3  -4  13-25.5197 29.8954   5
   3   4  13-35.0246 32.4594   2
   3   4  13 3.72795 33.2699   3
  -3  -4  13-46.2574 37.1300   7
   4  -3  13 3.69295 34.8845   3
   4  -3  14-3.99429 38.1324   3
  -3  -4  14-14.9990 37.6355   7
   3   4  14 19.8873 36.0253   3
   3   4  14 55.9836 33.8070   2
  -4   3  14 10.3089 34.4927   3
   4  -3  14 3.87194 38.5822   7
  -3  -4  15-3.95593 38.2569   7
  -4   3  15-22.2017 33.8070   3
   3   4  15-7.99215 34.6792   2
   4  -3  15-12.4831 40.6491   7
   3   4  15-12.7436 36.5084   3
  -4   2 -15-49.8114 43.2378   1
  -2  -4 -15-23.2161 41.0709   1
  -2  -4 -15-3.69544 33.1012   6
   4  -2 -15 32.0987 36.1467   1
   2   4 -15 31.7743 34.3816   2
   2   4 -15-34.6871 41.5153   3
   2   4 -15 57.4861 36.2584   1
  -4   2 -14-4.52971 38.1517   1
   4  -2 -14 3.22880 31.2176   6
   2   4 -14-4.14003 38.2406   3
  -4   2 -14-34.2662 38.6644   2
   2   4 -14 44.8350 35.9172   1
   4  -2 -14-26.1273 33.7926   1
  -2  -4 -14-62.9224 34.2274   6
  -2  -4 -14 38.7859 38.2090   1
   2   4 -14 18.9651 34.7399   2
   2   4 -13 39.3292 34.2104   2
   4  -2 -13 25.8944 27.1692   2
  -4   2 -13-32.7612 36.6386   1
  -4   2 -13 13.5192 25.8741   6
   4  -2 -13-10.3734 30.0931   1
   2   4 -13-3.91135 34.6790   3
  -2  -4 -13 27.8950 34.6795   1
   4  -2 -13-6.12756 29.4698   6
  -2  -4 -13 9.83134 32.0071   6
   2   4 -13-29.5946 35.1170   1
  -2  -4 -13 23.0940 28.5374   8
  -4   2 -13 12.0956 36.0725   2
   4  -2 -12-20.1329 23.1144   8
  -4   2 -12-14.8022 24.5733   6
   2   4 -12-23.3544 32.2531   2
  -4   2 -12-36.5743 33.4947   1
  -4   2 -12-33.4914 35.9737   2
   2   4 -12 14.6293 33.3019   3
   4  -2 -12 19.0590 28.5879   1
  -2  -4 -12 51.5503 30.5658   6
   4  -2 -12 8.63734 27.0372   6
  -2  -4 -12 10.9604 33.3627   1
   2   4 -12-33.3123 30.3329   1
  -2  -4 -12 26.7137 25.9919   8
   2   4 -11 17.9071 26.3036   1
  -2  -4 -11-13.6262 24.2107   8
   4  -2 -11 11.5810 25.5175   1
   2   4 -11 21.4114 28.1774   2
  -4   2 -11-13.6332 30.9492   2
  -2  -4 -11 23.2607 29.3749   1
  -2  -4 -11 5.58612 27.8921   6
   4  -2 -11 39.9262 26.7724   6
  -4   2 -11-16.3423 30.1930   1
   4  -2 -11-14.3773 24.3870   8
  -4   2 -11 19.9737 22.0592   6
   4  -2 -10-10.6513 20.2670   4
   2   4 -10-11.0991 27.9672   2
  -4   2 -10-31.7193 27.6590   1
  -4   2 -10 3.08173 29.6366   2
  -4   2 -10 8.75220 16.1923   8
   2   4 -10-9.93533 19.1808   6
  -2  -4 -10-10.2133 25.3069   6
   4  -2 -10 15.8641 23.1633   8
  -2  -4 -10-10.5131 24.1808   8
   4  -2 -10 41.2239 25.8966   6
  -4   2 -10-4.01042 21.5488   6
   2   4 -10 13.1114 24.0820   1
   2   4  -9 37.9468 16.7809   8
   2   4  -9 24.7051 21.0760   6
  -4   2  -9 14.3077 23.0153   6
   4  -2  -9 31.6979 25.1188   8
   2   4  -9 34.6566 29.0482   2
  -2  -4  -9-5.81097 23.7301   8
   2   4  -9 4.59160 26.4775   1
  -4   2  -9 10.1195 15.9048   8
  -2  -4  -9 36.9550 27.8105   6
   4  -2  -9 18.1678 20.5808   4
   4  -2  -9 41.7629 27.0358   6
  -4   2  -8 61.9512 15.4321   8
   4  -2  -8 117.636 25.8914   6
   2   4  -8 59.4316 16.2632   8
   2   4  -8 36.8911 26.0741   2
  -2  -4  -8 60.1671 25.6033   6
   4  -2  -8 60.8364 19.9520   4
   2   4  -8 71.3407 18.3572   6
  -2  -4  -8 57.9229 23.4310   8
  -4   2  -8 63.4911 20.6272   6
   2   4  -8 78.9274 22.9248   1
   4  -2  -8 78.9922 23.3166   8
  -2  -4  -8 62.2860 13.3790   4
  -2  -4  -7 131.344 21.4723   8
  -4   2  -7 105.012 19.2181   6
   2   4  -7 157.054 17.3709   6
   2   4  -7 160.504 23.5064   2
  -2  -4  -7 97.6724 23.7399   6
  -4   2  -7 95.2979 9.81810   4
   4  -2  -7 127.993 21.4887   8
  -4   2  -7 113.137 16.1897   8
   4  -2  -7 122.391 19.2149   4
  -2  -4  -7 114.389 14.0073   4
  -2  -4  -7 117.966 13.6213   5
   2   4  -7 121.629 15.6919   8
   2   4  -7 189.758 22.4984   1
  -4   2  -7 79.0263 9.83004   4
   2   4  -6 5095.98 472.425   1
  -2  -4  -6 4412.62 469.711   4
   2   4  -6 5402.64 473.698   3
  -4   2  -6 5266.28 471.772   6
  -2  -4  -6 5198.65 473.137   6
   2   4  -6 5122.70 472.906   2
  -2  -4  -6 4970.51 469.324   5
  -4   2  -6 5154.80 470.293   8
   4  -2  -6 5022.65 471.802   4
   2   4  -6 5162.41 470.593   6
  -2  -4  -6 5224.63 469.877   4
  -2  -4  -6 5134.06 472.343   8
   2   4  -6 5247.04 470.265   8
   2   4  -6 5202.28 470.324   8
  -2  -4  -5 211.355 27.2087   8
   2   4  -5 240.842 28.1616   2
   2   4  -5 303.961 27.2073   1
  -4   2  -5 345.260 29.9124   1
  -4   2  -5 214.256 26.3842   6
  -2  -4  -5 207.451 21.5695   5
   2   4  -5 230.350 29.2937   3
   2   4  -5 179.500 23.4731   6
   2   4  -5 200.954 23.4837   6
  -4   2  -5 200.945 23.5131   8
  -2  -4  -5 246.145 23.2223   4
   2   4  -5 203.001 22.8971   8
  -4   2  -4 8438.74 770.896   8
   2   4  -4 8643.11 772.692   3
  -2  -4  -4 8606.64 770.824   4
   2   4  -4 8510.62 772.298   2
  -4   2  -4 7669.08 769.709   4
   4  -2  -4 8442.22 772.097   5
   2   4  -4 8783.54 770.589   6
  -4   2  -4 8037.86 772.491   1
  -2  -4  -4 8617.04 770.763   7
  -4   2  -4 8492.80 771.921   6
   4  -2  -4 8723.49 771.245   2
   2   4  -4 8515.79 770.641   6
   2   4  -4 7945.97 771.918   1
   2   4  -4 8941.42 770.622   8
  -2  -4  -4 8305.92 769.838   5
   4  -2  -3 2204.57 179.758   3
   4  -2  -3 3040.87 181.068   1
  -4   2  -3 3021.77 182.513   1
   2   4  -3 2658.08 181.432   2
   2   4  -3 1713.91 178.581   6
   4  -2  -3 1619.71 179.345   7
   2   4  -3 1635.55 178.668   6
  -4   2  -3 1774.27 180.279   6
  -4   2  -3 1796.34 179.419   8
   4  -2  -3 2886.25 179.948   2
   2   4  -3 1705.43 178.919   8
   4  -2  -3 1829.80 180.352   5
   4  -2  -3 1778.67 179.957   5
  -4   2  -3 1814.96 178.590   4
  -2  -4  -3 1861.90 179.127   7
  -2  -4  -3 1975.14 181.243   6
   2   4  -3 2921.08 181.371   1
  -2  -4  -3 1904.33 179.489   4
  -4   2  -2 27430.6 2487.93   2
   2   4  -2 27133.3 2487.73   7
   4  -2  -2 27262.5 2487.44   5
  -2  -4  -2 27631.0 2487.59   1
  -4   2  -2 27021.6 2487.21   5
  -4   2  -2 27322.1 2487.91   1
   4  -2  -2 26485.9 2487.03   7
   2   4  -2 26990.6 2486.57   8
  -2  -4  -2 27202.3 2487.10   4
   2   4  -2 28027.6 2487.56   4
   4  -2  -2 26090.6 2486.46   2
   4  -2  -2 27150.3 2487.02   1
  -4   2  -2 26788.3 2487.57   2
  -4   2  -2 26655.0 2486.57   4
  -4   2  -2 26494.1 2487.33   7
   4  -2  -2 26572.0 2486.53   3
  -2  -4  -2 27472.9 2487.84   6
  -4   2  -2 26774.0 2487.07   8
  -4   2  -2 27168.3 2487.35   3
  -4   2  -2 27677.2 2487.68   6
   2   4  -2 26969.6 2487.37   2
  -2  -4  -2 26617.3 2486.64   7
   2   4  -2 26637.0 2487.28   1
   4  -2  -2 26760.6 2487.31   6
   2   4  -2 26531.4 2487.82   5
  -2  -4  -1 440.466 34.6715   2
  -4   2  -1 423.071 34.6225   2
   4  -2  -1 308.137 34.4841   4
  -4   2  -1 513.783 34.4996   2
  -2  -4  -1 280.359 34.0627   6
   2   4  -1 299.064 34.4443   5
  -2  -4  -1 301.672 33.1099   5
   4  -2  -1 475.274 33.8413   1
  -2  -4  -1 275.509 33.3103   7
  -2  -4  -1 511.997 34.4566   1
   4  -2  -1 273.622 34.4024   4
  -4   2  -1 303.273 33.8390   7
  -2  -4  -1 348.459 34.1876   4
  -4   2  -1 545.862 35.2516   1
   2   4  -1 289.067 34.3319   7
   2   4  -1 459.269 34.1134   2
  -2  -4  -1 264.818 34.0794   8
   4  -2  -1 306.999 34.2090   5
   2   4  -1 484.473 33.8162   1
   4  -2  -1 414.919 32.9833   2
  -4   2  -1 291.271 33.5226   4
  -4   2  -1 395.823 33.6602   3
  -4   2  -1 289.510 33.9248   8
   4  -2  -1 288.487 33.5866   7
   4  -2  -1 262.707 34.1027   8
   2   4  -1 288.775 33.2779   8
  -4   2  -1 287.529 34.2975   6
   4  -2   0 22833.5 2108.73   6
   2   4   0 22333.1 2108.39   8
   4  -2   0 23915.3 2108.76   8
   4  -2   0 22527.3 2108.34   7
   4  -2   0 23331.2 2108.83   4
   4  -2   0 21856.4 2108.33   1
  -2  -4   0 22851.2 2108.55   5
  -2  -4   0 23801.9 2108.35   2
   2   4   0 21690.5 2108.14   6
   2   4   0 23069.6 2108.61   4
  -4   2   0 22857.4 2108.16   2
  -4   2   0 22578.8 2108.53   5
   2   4   0 22821.5 2108.48   5
   2   4   0 23379.7 2108.37   7
  -2  -4   0 22369.7 2108.13   6
   4  -2   0 22847.5 2108.73   4
  -4   2   0 22834.5 2108.27   1
   2   4   0 22972.9 2108.19   1
  -4   2   0 22966.1 2108.41   7
   2   4   0 22463.7 2108.52   2
  -2  -4   0 23011.9 2108.40   8
  -2  -4   0 23091.6 2108.09   1
  -4   2   0 22506.1 2108.79   8
   4  -2   0 22988.1 2108.22   2
  -2  -4   1 301.165 31.2686   5
   4  -2   1 298.652 30.5280   7
  -2  -4   1 325.499 31.2733   4
   4  -2   1 397.690 30.1880   3
   4  -2   1 309.109 30.8403   6
  -4   2   1 488.064 30.6036   1
  -2  -4   1 436.715 30.6584   2
   2   4   1 278.890 30.5493   6
  -2  -4   1 283.010 29.7108   8
   2   4   1 276.286 30.5598   8
  -2  -4   1 489.177 30.6150   1
   2   4   1 277.451 29.8311   7
   4  -2   1 300.831 30.1848   8
   4  -2   1 249.782 30.2541   5
   2   4   1 294.368 30.3566   4
   4  -2   1 506.284 31.6675   1
   2   4   1 495.788 31.5255   1
   2   4   1 300.244 29.6090   5
  -4   2   1 273.057 30.1935   7
  -4   2   1 305.173 30.7656   5
  -4   2   1 210.102 28.9846   2
   4  -2   1 310.537 29.9893   4
   2   4   1 334.561 32.4926   3
  -2  -4   1 285.084 30.8005   7
  -4   2   2 24718.9 2405.55   3
  -2  -4   2 25779.8 2406.67   3
  -4   2   2 26346.5 2406.60   5
   4  -2   2 26987.7 2405.90   8
   4  -2   2 26255.4 2406.42   5
   4  -2   2 26006.6 2406.60   1
  -2  -4   2 26210.6 2405.70   8
  -4   2   2 26110.3 2406.39   1
   2   4   2 25447.6 2406.74   6
   2   4   2 25943.9 2406.63   3
   4  -2   2 26620.4 2406.43   6
   2   4   2 26475.5 2405.67   7
  -4   2   2 27148.4 2406.67   6
   4  -2   2 26308.2 2405.51   4
  -2  -4   2 26087.2 2406.17   1
   2   4   2 25747.1 2405.99   4
   2   4   2 24972.0 2406.83   1
  -2  -4   2 26233.3 2406.53   2
  -2  -4   2 26719.6 2406.76   4
  -4   2   2 25881.9 2405.62   2
  -4   2   2 24559.1 2406.96   8
   4  -2   2 25903.2 2406.44   3
  -2  -4   3 1758.17 195.410   8
   2   4   3 2143.14 197.123   3
  -2  -4   3 2973.01 197.100   1
  -4   2   3 3047.52 197.877   1
   2   4   3 1781.67 195.520   7
   2   4   3 3156.08 198.805   1
  -4   2   3 3050.83 196.444   2
  -4   2   3 2360.76 196.160   3
   2   4   3 1975.98 195.651   4
   4  -2   3 1797.81 196.408   5
   4  -2   3 1752.53 195.511   8
  -4   2   3 1745.63 196.755   6
  -2  -4   3 1874.39 196.695   4
  -4   2   3 1813.99 197.154   8
   4  -2   3 2356.71 197.233   3
  -2  -4   4 8491.25 781.517   4
   4  -2   4 8265.63 781.995   7
  -4   2   4 8701.56 781.015   2
   2   4   4 8035.54 782.313   1
   4  -2   4 8729.77 781.813   5
   2   4   4 8259.50 780.428   4
  -4   2   4 9057.73 782.224   6
  -2  -4   4 8602.42 782.717   5
  -4   2   4 8532.43 781.939   1
   4  -2   4 8373.43 780.562   8
   2   4   4 8611.80 780.747   7
   4  -2   4 8120.82 782.039   3
  -2  -4   4 8309.43 780.368   8
  -4   2   4 8359.12 782.175   8
   2   4   4 8244.20 782.196   2
   2   4   4 7806.60 781.912   3
  -2  -4   4 8814.30 782.604   7
  -4   2   4 8558.01 781.140   3
   2   4   5 194.635 24.7986   7
   2   4   5 315.935 30.2322   2
  -4   2   5 273.341 26.5825   3
  -4   2   5 239.830 25.6932   7
  -4   2   5 347.544 29.2244   1
  -4   2   5 204.055 27.3837   6
   4  -2   5 176.426 27.9769   7
  -2  -4   5 169.121 22.8760   8
   4  -2   5 270.202 28.9894   3
  -4   2   5 303.944 25.8598   2
   2   4   5 194.291 23.2552   4
  -2  -4   5 205.936 29.2338   7
   2   4   5 221.465 28.3844   3
   4  -2   5 217.655 27.4646   5
  -2  -4   5 227.732 29.6648   5
  -2  -4   5 190.519 25.7100   4
  -4   2   5 205.091 27.4273   8
  -4   2   6 5343.80 478.668   6
   4  -2   6 5242.29 478.020   5
   4  -2   6 4895.64 478.791   3
   2   4   6 5124.33 477.006   7
  -4   2   6 5697.89 477.706   7
   4  -2   6 4974.99 478.567   7
   2   4   6 5155.38 478.950   2
  -4   2   6 5131.30 478.184   8
  -4   2   6 4804.94 478.163   1
  -2  -4   6 5618.30 479.580   5
  -4   2   6 5038.73 477.284   5
  -4   2   6 5003.68 477.581   3
   2   4   6 5154.63 475.819   5
   2   4   6 5053.67 478.798   3
  -2  -4   6 4924.64 477.198   4
  -2  -4   6 5644.89 479.386   7
  -4   2   6 4740.88 477.093   2
  -4   2   7 91.2226 22.6437   6
  -4   2   7 107.234 21.9761   7
  -2  -4   7 154.643 27.5491   5
   4  -2   7 235.262 26.6352   2
   2   4   7 136.409 25.2369   3
   2   4   7 227.929 26.1507   2
  -4   2   7 93.7650 20.9163   5
  -4   2   7 205.657 22.7869   2
  -2  -4   7 121.531 26.0421   7
   2   4   7 118.987 21.4872   7
   4  -2   7 156.593 24.2776   5
   4  -2   7 168.314 25.7183   7
  -2  -4   7 149.673 20.8266   4
   4  -2   7 136.105 26.3246   3
  -4   2   7 267.138 26.9069   1
  -4   2   7 142.210 23.1259   3
   2   4   7 117.574 18.7144   5
  -4   2   8 110.937 21.9357   7
   4  -2   8 24.8722 22.9845   5
  -2  -4   8 97.0142 28.2298   7
   2   4   8 79.0989 26.5175   2
  -2  -4   8 79.6782 29.1507   5
   4  -2   8 74.2045 25.8535   7
  -4   2   8 80.3512 23.6483   1
  -2  -4   8 79.7836 18.6075   4
   2   4   8 36.8561 14.1496   5
  -4   2   8 62.2686 21.3698   2
   2   4   8 52.0466 20.2045   7
   2   4   8 93.5652 27.6644   3
  -4   2   8 56.7788 18.6834   5
  -4   2   8 55.1589 22.8189   3
  -2  -4   9-19.3354 29.3506   7
  -4   2   9 16.0037 25.3634   1
  -4   2   9 20.5451 24.6349   3
  -2  -4   9 19.3336 27.4763   5
   2   4   9 17.2170 21.3692   7
  -4   2   9 3.53626 24.9761   7
  -4   2   9 29.2733 21.7643   2
   4  -2   9-13.9870 27.0415   7
   2   4   9 38.0878 28.0994   2
   2   4   9-25.3550 30.4348   3
   4  -2   9 2.02929 25.2879   5
  -2  -4   9 32.6059 18.8897   4
   2   4   9 36.0509 29.9692   1
  -4   2   9 34.0929 22.3543   5
  -4   2  10-21.0022 25.3395   3
   4  -2  10 20.3293 23.7685   5
  -2  -4  10-5.26524 25.7756   5
  -2  -4  10 16.1647 28.7136   7
   2   4  10-37.4684 30.5877   1
   2   4  10 17.7211 22.8111   7
   4  -2  10 20.9126 26.4126   7
   2   4  10 11.2107 27.6451   3
  -4   2  10-15.4651 24.9188   1
  -4   2  10-5.93774 25.0427   7
  -4   2  10 39.6440 20.2719   5
  -4   2  10-6.17879 21.1026   2
   2   4  10 13.2268 26.9161   2
  -4   2  11-22.2085 25.1526   7
   4  -2  11 17.4450 24.7931   5
  -4   2  11-2.29911 21.9744   2
  -4   2  11 60.0786 27.6893   3
  -2  -4  11 5.94435 28.9787   7
   2   4  11 61.3819 26.7203   2
  -2  -4  11 5.68257 27.6351   5
   2   4  11 17.6082 21.3686   7
   4  -2  11-5.76962 26.2208   7
   2   4  11 15.4801 29.4912   3
  -4   2  12 23.1153 30.9969   3
   4  -2  12-27.1855 32.1781   3
   2   4  12-44.1901 31.2949   2
  -2  -4  12-3.03833 28.5413   5
   4  -2  12-3.19415 31.1235   7
  -2  -4  12 19.5205 33.5658   7
   2   4  13-36.4579 35.3454   3
   2   4  13 47.7889 31.4515   2
   4  -2  13 3.48881 34.4229   7
   4  -2  13 33.2558 35.1780   3
  -2  -4  13 7.08047 34.9299   7
  -4   2  13 6.34679 30.7693   3
  -4   2  14-3.45467 34.8453   3
   4  -2  14 30.0599 36.5319   7
   2   4  14-15.6404 38.1100   3
  -2  -4  14 7.66166 36.4810   7
   4  -2  14 39.8368 35.7680   3
   2   4  14 25.4759 32.6814   2
  -4   2  15-40.8404 39.1502   3
   2   4  15 8.33679 38.5011   3
  -2  -4  15-40.0144 42.3751   7
   4  -2  15 56.5243 35.1348   7
   2   4  15-11.7004 33.7247   2
  -4   1 -15-67.1076 41.4736   2
   4  -1 -15 11.9311 33.9897   1
   1   4 -15-9.08756 38.9478   1
   1   4 -15 20.4864 37.2413   2
  -4   1 -15-68.8059 44.1336   1
  -1  -4 -15-13.6465 39.3708   1
   1   4 -15-4.36981 37.9453   3
  -1  -4 -15-11.0139 33.8594   6
  -4   1 -14 21.1788 36.2759   2
   1   4 -14-29.1445 36.8036   3
   4  -1 -14 11.1230 32.6750   1
  -4   1 -14-15.2014 28.6347   6
  -1  -4 -14 3.48523 34.1269   6
   1   4 -14-39.0527 35.6671   2
   1   4 -14-4.18068 37.2938   1
  -4   1 -14 44.8959 38.5742   1
  -1  -4 -14-46.6571 39.3993   1
  -1  -4 -13 18.2543 27.2032   8
   1   4 -13-29.4300 34.9208   2
   4  -1 -13 30.7276 31.0006   1
  -4   1 -13-5.58782 28.0988   6
  -4   1 -13-11.8388 34.0143   2
  -1  -4 -13 68.4870 33.7171   6
   1   4 -13-23.5597 36.2685   3
   4  -1 -13-20.6026 27.1113   2
  -4   1 -13 8.09704 34.6696   1
   1   4 -13 18.9421 34.6963   1
  -1  -4 -13 19.6459 35.8823   1
   4  -1 -13 14.8249 27.9971   6
   4  -1 -12 37.6580 25.6135   2
   4  -1 -12-21.8957 29.0636   1
   1   4 -12-3.40825 29.1963   1
  -1  -4 -12-18.2343 31.8475   6
   4  -1 -12 16.6906 28.7694   6
  -4   1 -12 21.7822 31.2998   1
  -4   1 -12-3.63310 30.6084   2
   4  -1 -12 19.0248 23.2974   8
  -4   1 -12-5.10243 24.6771   6
  -1  -4 -12-25.3035 33.6763   1
   1   4 -12 51.2697 32.7967   2
  -1  -4 -12 37.1074 26.3778   8
  -1  -4 -11 8.42651 25.7304   6
  -1  -4 -11 30.3776 24.0563   8
   1   4 -11 50.3405 30.1076   2
  -4   1 -11 9.26891 24.3889   6
   4  -1 -11-4.53246 21.9729   8
   4  -1 -11-10.2709 26.0108   6
   1   4 -11 9.15413 27.3863   1
   4  -1 -11-2.84143 26.0288   1
  -4   1 -11-29.1039 30.8633   1
  -4   1 -11-9.93992 30.6076   2
   1   4 -11 22.3588 19.8256   6
   1   4 -10 32.1832 25.0402   1
  -1  -4 -10 23.9813 25.2705   8
   1   4 -10 8.51651 27.4993   2
   1   4 -10 39.7289 19.2228   6
  -1  -4 -10 20.5875 27.5975   6
   4  -1 -10 30.6742 26.6017   1
  -4   1 -10-2.07874 22.7306   6
   4  -1 -10 16.3397 25.9649   6
   4  -1 -10 42.7865 23.3892   8
   4  -1 -10 5.38539 19.8064   4
  -4   1 -10 6.88923 16.2558   8
   4  -1  -9 358.199 43.3095   4
   4  -1  -9 316.703 46.2472   6
   1   4  -9 375.449 50.8396   2
  -1  -4  -9 383.224 46.0548   8
   4  -1  -9 342.774 44.8712   8
   1   4  -9 381.093 39.9309   8
  -4   1  -9 320.500 40.4329   8
  -4   1  -9 328.684 44.3906   6
  -1  -4  -9 385.959 49.3034   6
   1   4  -9 378.302 41.9553   6
  -1  -4  -9 414.493 39.1784   4
   1   4  -9 305.538 47.8245   1
  -1  -4  -8 105.292 27.0141   6
   1   4  -8 173.031 27.9724   1
  -4   1  -8 91.3062 18.9252   8
   1   4  -8 82.9148 16.7381   8
  -1  -4  -8 80.4215 24.5884   8
   1   4  -8 93.6853 27.3768   2
   4  -1  -8 98.3871 21.3953   4
   4  -1  -8 82.6079 23.7973   8
  -4   1  -8 102.744 23.5774   6
  -1  -4  -8 87.3087 15.7635   4
   1   4  -8 103.883 19.6434   6
   4  -1  -8 120.116 26.0199   6
  -4   1  -7 166.412 23.7165   6
   1   4  -7 179.220 25.1982   1
   1   4  -7 159.976 18.8938   8
  -1  -4  -7 168.380 18.9551   4
   1   4  -7 121.511 19.6599   6
   1   4  -7 202.335 27.2294   2
  -4   1  -7 131.298 19.9436   8
  -1  -4  -7 171.326 25.8015   8
  -1  -4  -7 136.668 26.0004   6
  -1  -4  -6 442.436 50.4673   6
  -1  -4  -6 446.890 45.7098   4
  -1  -4  -6 448.005 49.9046   8
  -4   1  -6 425.705 46.6205   8
   1   4  -6 424.829 45.4098   8
   1   4  -6 713.200 51.3231   1
  -1  -4  -6 421.123 44.9223   5
   1   4  -6 444.138 46.5915   6
   1   4  -6 714.293 52.3200   2
  -4   1  -6 751.585 52.6557   1
   1   4  -6 427.966 45.5754   8
  -4   1  -6 436.754 48.2631   6
  -4   1  -5 9474.79 900.815   1
   1   4  -5 10145.8 899.089   6
  -1  -4  -5 9679.52 898.769   4
   1   4  -5 9738.54 898.434   8
   1   4  -5 9795.78 898.471   8
  -4   1  -5 9970.28 899.126   8
   1   4  -5 9668.88 898.858   6
  -4   1  -5 9743.43 900.154   6
   1   4  -5 9652.30 900.560   1
  -1  -4  -5 9612.11 900.624   8
   1   4  -5 9546.92 901.031   2
  -1  -4  -5 9441.33 898.063   5
   1   4  -4 93.0992 12.2889   6
   1   4  -4 161.155 17.6162   2
   1   4  -4 96.9756 11.3660   8
  -1  -4  -4 114.096 13.2101   4
  -4   1  -4 175.205 16.8595   1
   4  -1  -4 172.233 13.9256   2
   1   4  -4 99.4286 12.5778   6
  -4   1  -4 107.945 13.5120   8
   1   4  -4 185.051 16.6824   1
  -1  -4  -4 89.1461 11.7712   7
  -1  -4  -4 77.1702 10.5602   5
  -4   1  -4 101.580 15.0194   6
   1   4  -3 8040.70 705.588   4
   1   4  -3 7985.40 704.535   6
   1   4  -3 7651.72 704.334   8
   4  -1  -3 7336.95 705.194   3
  -1  -4  -3 7711.92 706.409   6
   4  -1  -3 7395.65 704.842   2
   4  -1  -3 7491.18 706.115   5
   4  -1  -3 6928.65 705.169   7
   1   4  -3 7284.73 706.099   2
   1   4  -3 7619.56 704.430   6
  -4   1  -3 7902.62 705.933   6
  -1  -4  -3 7691.81 705.159   4
  -4   1  -3 7708.71 705.222   8
   1   4  -3 7358.39 705.938   1
   4  -1  -3 7267.32 705.433   1
  -1  -4  -3 7872.30 704.590   7
  -4   1  -3 7693.76 706.148   1
  -4   1  -3 7638.52 705.239   5
   1   4  -2 1316.10 135.644   5
  -1  -4  -2 1149.20 135.544   6
   4  -1  -2 1226.63 134.984   6
  -4   1  -2 1327.96 134.962   5
   1   4  -2 1317.07 135.238   4
   4  -1  -2 2106.55 135.339   1
  -1  -4  -2 1287.26 134.943   4
   1   4  -2 1197.28 134.021   8
   1   4  -2 1830.45 136.021   2
  -4   1  -2 2144.56 136.286   2
  -1  -4  -2 1183.82 134.159   7
   4  -1  -2 1209.00 135.528   8
  -4   1  -2 1196.84 135.353   6
   4  -1  -2 1664.04 134.749   3
  -1  -4  -2 1267.83 135.649   6
  -4   1  -2 1620.39 135.592   3
  -1  -4  -2 2299.11 136.532   1
   4  -1  -2 1230.13 135.507   5
   4  -1  -2 1362.65 135.417   5
   1   4  -2 2171.96 136.333   1
  -4   1  -2 1197.65 134.904   8
   1   4  -2 1188.24 135.395   7
  -4   1  -2 2146.68 136.551   1
  -1  -4  -2 1480.35 135.552   3
   4  -1  -2 1995.00 134.437   2
   1   4  -1 42766.3 4038.72   2
  -1  -4  -1 42875.7 4038.16   5
  -4   1  -1 44903.5 4038.98   8
   1   4  -1 42684.3 4038.62   1
  -1  -4  -1 39508.6 4039.58   3
  -4   1  -1 43643.1 4038.75   5
   4  -1  -1 44732.9 4038.80   7
   4  -1  -1 43429.1 4038.87   6
   4  -1  -1 45576.1 4039.25   4
  -1  -4  -1 45433.2 4038.93   4
   1   4  -1 41668.4 4038.79   3
  -1  -4  -1 45981.6 4038.79   1
   4  -1  -1 42903.2 4038.24   1
   1   4  -1 43102.1 4039.00   5
  -4   1  -1 44055.7 4038.93   1
  -4   1  -1 42631.7 4038.70   2
  -1  -4  -1 43926.8 4038.97   6
  -1  -4  -1 43103.6 4038.99   6
  -4   1  -1 44783.4 4038.55   3
  -4   1  -1 44579.0 4038.78   7
   1   4  -1 44377.6 4038.23   8
   1   4  -1 44128.1 4038.97   7
  -1  -4  -1 44325.6 4039.08   8
   4  -1   0 1834.54 214.994   8
  -1  -4   0 1865.13 214.534   6
   4  -1   0 3266.36 215.099   1
  -1  -4   0 1914.35 214.493   6
   1   4   0 1906.44 214.689   7
  -1  -4   0 1878.94 214.688   8
  -1  -4   0 1706.08 214.462   7
  -4   1   0 3184.55 214.677   2
  -4   1   0 2257.22 215.316   4
  -4   1   0 2529.27 214.341   3
   1   4   0 3365.35 215.288   1
   4  -1   0 2325.78 215.221   4
  -4   1   0 2854.58 214.694   2
   1   4   0 2248.53 215.225   3
   1   4   0 1927.48 214.988   4
  -4   1   0 3313.46 214.939   1
   4  -1   0 1872.97 214.878   7
  -1  -4   0 2005.60 214.884   5
  -1  -4   0 2978.60 215.171   2
   4  -1   0 2359.03 214.284   3
   1   4   0 1973.94 214.736   5
  -4   1   0 1938.46 214.880   7
  -1  -4   0 3317.13 215.124   1
   1   4   0 1891.74 214.765   8
  -4   1   1 42742.2 4003.74   1
  -4   1   1 42606.3 4004.47   5
   4  -1   1 44858.3 4004.01   4
  -4   1   1 42645.0 4004.16   7
  -1  -4   1 43029.9 4004.48   7
  -1  -4   1 41390.6 4004.11   1
   1   4   1 44376.3 4003.58   7
   4  -1   1 44417.8 4004.23   8
   1   4   1 44922.7 4005.18   3
  -1  -4   1 42410.0 4004.59   5
   4  -1   1 43738.7 4004.49   6
  -1  -4   1 43493.1 4003.60   8
  -4   1   1 42799.4 4004.26   6
   4  -1   1 45337.3 4003.95   4
   1   4   1 43638.6 4004.19   4
  -1  -4   1 42911.7 4004.41   4
   1   4   1 44398.3 4003.52   5
   1   4   1 43226.2 4004.46   8
   1   4   1 42902.9 4004.39   1
   4  -1   1 41115.0 4004.20   1
  -1  -4   1 41891.0 4004.22   2
   4  -1   1 42330.7 4004.11   2
   4  -1   1 42801.8 4004.19   5
   4  -1   1 43124.1 4004.07   3
  -1  -4   2 1819.90 27.0783   2
   4  -1   2 1281.93 21.7792   6
   4  -1   2 1202.50 20.0534   5
   1   4   2 2137.20 31.2652   1
   1   4   2 1128.20 13.3391   7
   4  -1   2 2104.51 27.0980   1
   1   4   2 1338.41 19.5724   4
  -4   1   2 2270.54 25.7888   1
  -4   1   2 1230.47 25.0220   8
  -1  -4   2 1194.16 24.3810   7
   4  -1   2 1403.54 15.0820   4
   4  -1   2 2144.37 28.2879   2
   1   4   2 1445.47 24.1514   3
   1   4   2 1894.51 29.1297   2
   4  -1   2 1251.30 18.5467   8
  -4   1   2 1353.15 26.5147   4
  -4   1   2 1242.64 21.7357   6
   4  -1   2 1645.98 25.1252   3
  -1  -4   2 2029.05 26.0055   1
  -1  -4   2 1284.50 22.7752   4
  -1  -4   3 7764.49 735.234   1
  -4   1   3 7870.11 736.028   4
   4  -1   3 7947.08 735.845   3
  -4   1   3 7628.47 734.497   2
   4  -1   3 8164.75 735.613   7
   1   4   3 7746.56 735.533   3
  -4   1   3 7734.30 734.799   3
   1   4   3 8009.05 734.754   4
  -1  -4   3 8123.22 735.361   4
   4  -1   3 8404.16 734.802   8
  -4   1   3 7861.87 735.919   8
   1   4   3 7905.60 734.397   7
  -4   1   3 8135.48 735.586   6
  -4   1   3 7610.61 735.256   1
   4  -1   3 7865.01 735.729   2
   4  -1   3 8109.45 735.200   5
   1   4   3 7744.27 735.892   2
  -1  -4   3 8486.32 736.379   5
   4  -1   4 91.0018 13.7496   8
  -4   1   4 161.351 17.0393   1
   1   4   4 93.7374 13.3079   4
  -4   1   4 93.4634 16.2658   6
   1   4   4 132.222 16.9606   3
  -1  -4   4 83.0715 14.0902   4
  -4   1   4 110.745 15.2898   7
  -4   1   4 120.429 14.5633   3
  -4   1   4 106.613 16.5437   4
   4  -1   4 99.2050 15.2063   5
   1   4   4 153.248 17.9544   2
  -4   1   4 121.842 16.1924   5
  -4   1   4 185.115 14.3912   2
  -1  -4   4 74.6551 17.7009   5
   4  -1   4 90.1699 15.5115   7
   1   4   4 84.9414 13.0870   7
  -4   1   4 91.4194 15.8481   8
  -4   1   5 9845.79 290.884   8
  -4   1   5 10035.6 290.250   5
   1   4   5 9350.41 291.973   2
  -4   1   5 9865.59 288.158   2
   4  -1   5 9810.16 291.532   7
  -4   1   5 10110.6 291.494   6
  -4   1   5 9566.53 291.024   1
  -1  -4   5 11060.4 295.071   5
   4  -1   5 9702.16 292.999   3
   1   4   5 9927.00 287.502   7
   4  -1   5 10117.7 290.000   5
  -1  -4   5 10060.5 288.463   4
  -1  -4   5 9970.36 293.522   7
  -4   1   5 10194.4 292.171   4
  -4   1   5 11008.9 290.694   7
   1   4   5 9457.08 292.216   3
   1   4   5 9169.81 286.130   4
  -4   1   5 9749.91 289.343   3
  -4   1   6 689.456 52.9303   2
  -1  -4   6 400.248 54.4910   7
  -4   1   6 471.521 53.6836   6
   4  -1   6 531.630 55.5671   3
   4  -1   6 415.651 54.0287   7
  -1  -4   6 462.885 51.4428   4
  -4   1   6 524.176 52.9977   7
   1   4   6 528.639 54.5012   3
   4  -1   6 430.840 52.9180   5
  -4   1   6 596.987 53.9305   3
  -4   1   6 436.923 52.9917   5
  -1  -4   6 528.052 55.7649   5
  -4   1   6 544.609 53.4487   4
   1   4   6 451.749 49.9282   5
  -4   1   6 442.761 52.8106   8
  -4   1   6 851.040 55.9754   1
   1   4   6 460.292 51.6319   7
   1   4   6 713.766 56.0899   2
  -1  -4   6 658.475 55.4883   3
   1   4   7 164.302 18.9961   5
  -4   1   7 143.747 22.8552   4
   4  -1   7 148.162 25.1374   7
  -1  -4   7 148.914 26.7023   5
   1   4   7 141.936 21.8972   7
  -4   1   7 154.657 21.8574   2
   1   4   7 161.541 24.7934   2
  -4   1   7 171.815 24.2671   7
   4  -1   7 143.364 25.3878   2
  -1  -4   7 135.957 26.1681   7
   1   4   7 174.089 27.5046   1
  -1  -4   7 138.737 23.8588   3
  -4   1   7 156.679 23.6819   6
  -1  -4   7 132.149 20.6918   4
  -4   1   7 165.995 23.7024   3
   4  -1   7 132.954 22.2005   5
  -4   1   7 160.732 24.1877   1
   1   4   7 167.105 26.3210   3
  -4   1   7 171.757 23.0723   5
  -1  -4   8 113.653 19.2347   4
  -4   1   8 51.7109 21.3834   5
   4  -1   8 81.5491 25.2860   7
   4  -1   8 186.989 29.1925   2
  -1  -4   8 77.2720 27.3987   7
   1   4   8 115.707 25.9634   2
   1   4   8 77.3447 20.6525   7
   1   4   8 84.9262 27.1658   3
   1   4   8 157.617 28.8254   1
  -1  -4   8 107.352 28.7813   5
  -4   1   8 148.133 26.9982   1
  -4   1   8 157.655 23.5365   2
   4  -1   8 116.846 24.2174   5
   1   4   8 99.4129 17.6019   5
  -4   1   8 93.5094 25.0190   7
  -4   1   8 120.524 23.9036   3
  -1  -4   8 94.6281 27.2661   3
  -1  -4   9 328.931 48.4761   3
  -1  -4   9 387.843 50.0019   5
   4  -1   9 436.757 47.0426   5
  -1  -4   9 421.584 41.5612   4
  -4   1   9 304.281 46.3005   3
  -4   1   9 425.724 45.4319   2
   1   4   9 358.318 50.0538   1
   1   4   9 398.537 49.6746   3
  -4   1   9 363.787 44.4358   5
  -4   1   9 412.167 46.0151   7
   4  -1   9 306.488 47.3658   7
  -1  -4   9 375.134 49.9304   7
   4  -1   9 348.399 47.3519   2
   1   4   9 346.941 43.6860   7
  -4   1   9 321.385 47.3488   1
   1   4   9 329.841 47.3691   2
  -4   1  10 33.0338 20.4053   5
   4  -1  10-16.9912 23.6202   5
  -1  -4  10 45.3127 27.1217   5
  -1  -4  10 24.3769 28.5623   7
   1   4  10-25.6557 27.5598   1
   1   4  10 32.6348 22.8291   7
   4  -1  10 31.5162 27.3354   2
  -4   1  10-27.9920 24.9680   3
  -4   1  10 32.4912 22.2759   2
  -1  -4  10-12.6695 26.6058   3
   1   4  10-2.56802 25.8265   2
   1   4  10-13.6792 27.8376   3
  -4   1  10-31.7534 25.5543   7
   4  -1  10 2.50661 25.3876   7
  -4   1  11 4.67268 26.0655   7
  -4   1  11 65.3164 26.4941   3
   4  -1  11-19.5537 27.2452   7
  -1  -4  11 8.54567 28.4731   3
  -1  -4  11 32.8418 31.1701   7
   1   4  11 19.3901 23.3858   7
   1   4  11 51.3770 28.6427   3
   4  -1  11 46.6058 29.8353   3
  -1  -4  11-11.4124 28.1745   5
   1   4  11-17.0503 26.2822   2
  -4   1  11 2.11647 21.9722   5
   4  -1  11 25.6119 23.7293   5
   1   4  12-9.21433 27.6435   2
   4  -1  12 10.2072 30.1652   3
  -4   1  12-2.90184 28.3403   3
   4  -1  12-3.09437 30.5974   7
  -1  -4  12 3.02623 30.1430   5
  -1  -4  12 32.6481 32.4403   7
   1   4  12-36.2742 32.6071   3
  -4   1  12-20.6955 30.3934   7
   1   4  13 36.5631 30.8079   2
   4  -1  13 74.0073 34.4819   7
   4  -1  13-18.5100 32.9399   3
   1   4  13 21.4768 31.0705   3
  -1  -4  13-35.4459 36.4140   7
  -1  -4  13 25.6379 30.2793   5
  -4   1  13-12.7732 30.0089   3
   4  -1  14 55.8169 37.6509   3
  -1  -4  14-11.4713 38.0017   7
   4  -1  14-3.64161 37.4863   7
   1   4  14 26.8182 35.8882   3
  -4   1  14-55.4985 33.7991   3
   1   4  14-39.0041 34.4633   2
   4  -1  15-34.0561 37.1767   3
   1   4  15 32.8330 36.5120   3
  -1  -4  15 49.1849 40.7395   7
   4   0 -15-4.14755 36.0917   3
   0  -4 -15-3.65381 32.6887   6
   4   0 -15-47.6820 33.8028   1
   0   4 -15 8.41559 35.9140   2
  -4   0 -15-9.75298 42.2995   1
   0   4 -15 9.32376 39.1293   1
   0   4 -15 43.9706 37.7753   3
  -4   0 -15-17.7949 35.3844   2
   0  -4 -15-4.46657 36.7172   1
  -4   0 -14 66.7327 40.8562   1
  -4   0 -14-15.6798 30.1580   6
   0  -4 -14-34.5972 31.5006   6
   0   4 -14-16.0224 36.5762   2
   0   4 -14-29.2561 37.2758   3
  -4   0 -14-20.8522 37.5302   2
   0  -4 -14-4.16830 36.2695   1
   4   0 -14 44.1787 33.0325   1
   0   4 -14 34.2545 37.4923   1
  -4   0 -13 2.88870 27.0580   6
  -4   0 -13-12.0948 36.1785   1
  -4   0 -13 34.7645 32.7544   2
   4   0 -13 10.1918 27.8325   1
   4   0 -13-5.71151 28.0336   6
   0   4 -13-3.76642 33.1906   2
   0  -4 -13-3.26091 30.2914   6
   0  -4 -13 26.5536 27.7012   8
   0  -4 -13 42.5575 34.1981   1
   0   4 -13-7.74841 33.3947   1
   4   0 -13-3.00153 27.5716   2
   0  -4 -12-7.63239 25.5858   8
   0  -4 -12 15.2566 29.7999   6
   4   0 -12-10.6893 26.6830   6
   4   0 -12 24.9944 26.8491   2
   0  -4 -12 3.56112 33.4416   1
   4   0 -12-21.6459 30.5017   1
   0   4 -12-24.5775 32.7019   2
  -4   0 -12 3.62471 33.6667   1
  -4   0 -12 34.3661 25.9478   6
   0   4 -12 38.5137 32.1568   1
   4   0 -11 78.8828 23.3650   8
   4   0 -11 65.5718 26.5934   2
   4   0 -11 41.9839 25.9422   1
   0   4 -11 48.2030 32.1199   2
   0   4 -11-7.51051 22.3347   6
   0  -4 -11 14.4569 26.2888   8
   0   4 -11 96.5934 29.2299   1
   0  -4 -11 53.7284 30.3388   6
  -4   0 -11-14.4263 23.7980   6
   4   0 -11 66.8123 27.5244   6
  -4   0 -11 32.8476 20.9487   8
   0  -4 -10 10.4061 27.2778   6
   4   0 -10 38.3581 22.9331   2
   4   0 -10 45.1391 25.8338   1
   4   0 -10 40.1380 24.4840   6
   0   4 -10-32.0918 30.3836   2
   0   4 -10 6.62654 18.9849   6
   4   0 -10 32.0831 22.7122   8
   0   4 -10 16.5711 26.7921   1
  -4   0 -10 10.8028 21.9111   6
  -4   0 -10 21.0562 18.1317   8
   0  -4 -10 4.52030 24.0643   8
   4   0 -10-21.9284 21.0866   4
   0   4  -9 382.142 42.3623   8
   0  -4  -9 351.762 42.9159   4
  -4   0  -9 316.650 45.0261   8
   4   0  -9 698.140 53.9332   1
   4   0  -9 463.073 51.4573   6
  -4   0  -9 361.922 49.7405   6
   0  -4  -9 455.454 52.7028   6
   0  -4  -9 380.714 49.6053   8
   4   0  -9 338.562 47.4610   8
   0   4  -9 320.997 44.5044   6
   0   4  -9 613.238 54.6437   1
   0   4  -9 563.819 55.5844   2
   0   4  -8 572.879 59.1491   8
   0   4  -8 594.337 60.8650   6
   0  -4  -8 601.845 59.2832   4
   0  -4  -8 681.593 65.9750   6
  -4   0  -8 626.704 61.0262   8
   4   0  -8 622.713 63.7990   6
   0   4  -8 538.839 63.9745   1
   0   4  -8 551.651 65.8616   2
   4   0  -8 600.645 62.8569   8
   0  -4  -8 644.468 64.3775   8
  -4   0  -8 613.364 63.9042   6
   0   4  -7 138.187 20.7051   6
  -4   0  -7 172.185 22.1498   8
   0   4  -7 146.207 27.2715   2
   0   4  -7 297.698 27.9711   1
  -4   0  -7 256.374 27.6172   1
  -4   0  -7 164.366 24.8139   6
   0  -4  -7 134.956 25.2416   8
   0  -4  -7 133.273 25.9793   6
   0   4  -7 133.471 18.9255   8
   0  -4  -7 136.476 19.2680   4
   0  -4  -6 1072.42 113.689   6
  -4   0  -6 1224.68 113.769   1
  -4   0  -6 1160.13 112.635   6
   0  -4  -6 1164.48 113.491   8
   0  -4  -6 1124.59 110.555   4
   0  -4  -6 1099.03 109.920   5
   0   4  -6 1243.08 110.242   8
  -4   0  -6 1173.54 111.306   8
   0   4  -6 1143.12 113.999   2
   0   4  -6 1171.67 109.945   8
   0   4  -6 1215.06 113.498   1
   0   4  -6 1246.23 111.034   6
  -4   0  -5 104.437 20.0360   6
   0   4  -5 105.254 15.6101   6
   0  -4  -5 103.960 21.9187   8
  -4   0  -5 110.445 17.3730   8
   0   4  -5 94.4236 12.8835   8
   0  -4  -5 92.2896 22.9516   6
   0   4  -5 93.0687 15.4162   6
   0  -4  -5 95.9305 14.2773   7
   0  -4  -5 99.8743 13.5180   5
   0   4  -5 154.409 20.9661   1
   0  -4  -5 106.010 15.9105   4
   0   4  -5 89.0134 13.0539   8
   0   4  -5 135.437 22.3423   2
   0   4  -4 1457.38 139.180   8
   0  -4  -4 1454.18 141.861   8
   0   4  -4 1475.72 139.130   8
  -4   0  -4 1492.23 140.534   8
  -4   0  -4 1598.94 141.503   6
   0  -4  -4 1382.69 139.248   5
   0   4  -4 1508.67 141.788   1
   4   0  -4 1503.67 140.308   2
   0   4  -4 1565.40 139.867   6
   0   4  -4 1427.54 141.893   2
   0   4  -4 1532.90 140.253   4
   0  -4  -4 1598.62 139.722   7
   0  -4  -4 1538.37 140.305   4
  -4   0  -4 1639.12 141.944   1
   0   4  -3 296.653 29.8001   6
   0  -4  -3 262.114 29.3256   5
   0  -4  -3 334.084 31.0971   4
   0   4  -3 469.137 33.5034   1
   0   4  -3 301.972 32.6934   3
   4   0  -3 375.592 31.5638   3
   0  -4  -3 255.600 29.2415   5
   4   0  -3 467.315 30.9011   2
  -4   0  -3 279.112 31.0501   8
  -4   0  -3 328.689 31.9597   6
   0  -4  -3 284.524 29.6718   7
  -4   0  -3 513.414 33.3456   1
   4   0  -3 253.185 31.1892   7
   4   0  -3 282.134 30.8978   6
  -4   0  -3 301.974 30.6445   5
   0   4  -3 485.104 33.7635   2
   0   4  -3 340.425 31.0763   4
   4   0  -3 581.566 32.5515   1
   4   0  -2 35580.8 3193.32   8
  -4   0  -2 32813.7 3192.11   4
   0  -4  -2 33762.5 3193.18   1
   4   0  -2 35944.9 3192.86   6
   0   4  -2 33746.3 3193.31   5
  -4   0  -2 33715.7 3193.23   2
  -4   0  -2 34527.9 3193.19   1
  -4   0  -2 33303.5 3192.90   7
   0  -4  -2 36807.7 3193.10   3
   4   0  -2 34805.6 3193.64   5
   0  -4  -2 35308.8 3192.94   4
   4   0  -2 34064.8 3192.53   1
   4   0  -2 34731.9 3192.65   3
   4   0  -2 36229.7 3193.45   5
   0   4  -2 35810.1 3192.89   4
  -4   0  -2 34726.4 3192.69   5
  -4   0  -2 35179.7 3193.14   3
   0   4  -2 36483.9 3193.41   7
   0  -4  -2 36070.2 3193.46   6
  -4   0  -2 34695.8 3192.98   8
   4   0  -2 33043.7 3192.74   7
   0   4  -2 34537.4 3193.41   1
   4   0  -2 33873.0 3192.12   2
   4   0  -2 35969.8 3192.65   3
   4   0  -2 32814.3 3192.08   2
   0  -4  -2 34479.5 3193.17   2
   0   4  -2 35164.1 3192.06   6
   0   4  -2 35376.9 3193.44   3
   0   4  -1 33.3394 5.24163   6
  -4   0  -1 36.6751 7.78037   5
   0  -4  -1 43.1899 5.96243   5
   0  -4  -1 49.0137 7.55429   4
  -4   0  -1 74.3822 7.21205   1
   0   4  -1 38.8205 7.49532   4
   0  -4  -1 80.4282 7.90284   1
   4   0  -1 26.8252 8.11196   4
   4   0  -1 30.8427 6.94831   6
   4   0  -1 71.9291 5.64091   1
   0   4  -1 56.2863 7.29124   1
   0  -4  -1 39.5188 8.32030   8
   0  -4  -1 38.3160 9.24897   3
   0  -4  -1 39.9959 7.67139   6
   0   4  -1 45.2482 8.30584   5
  -4   0  -1 67.2266 7.58562   2
   4   0  -1 47.7229 5.89746   3
   0   4  -1 44.2773 7.68554   7
  -4   0  -1 58.0669 7.50103   3
   0   4  -1 57.8257 7.88622   3
   0   4  -1 43.0043 5.81432   8
  -4   0  -1 39.0940 7.45072   8
  -4   0  -1 45.9022 6.69086   4
   4   0  -1 36.1836 8.10371   7
   0  -4   0 921411. 81368.7   7
   0  -4   0 766681. 81368.7   8
   0   4   0 808439. 81368.8   8
  -4   0   0 924762. 81369.0   7
  -4   0   0 871023. 81368.4   1
   4   0   0 999999. 81368.6   3
  -4   0   0 993834. 81368.4   2
   0  -4   0 885076. 81368.7   3
   4   0   0 947478. 81369.1   5
   0  -4   0 726591. 81368.7   5
   0   4   0 879536. 81368.7   6
   4   0   0 925000. 81369.1   4
   0   4   0 834058. 81368.8   1
   0   4   0 904481. 81368.9   3
   0   4   0 826296. 81368.7   5
  -4   0   0 808895. 81368.8   3
   4   0   0 875892. 81369.1   8
  -4   0   0 946852. 81369.2   4
  -4   0   0 867855. 81369.1   6
   4   0   0 894718. 81368.4   2
   4   0   0 889975. 81368.5   1
   0   4   0 873820. 81368.6   7
   0  -4   0 902451. 81368.6   6
   0  -4   0 843423. 81368.7   1
   0   4   1 45.1847 5.03011   5
  -4   0   1 50.4539 5.48849   3
  -4   0   1 38.4542 7.19695   6
   0   4   1 53.7530 7.27278   4
   0   4   1 75.7793 9.27019   2
   4   0   1 64.6344 6.98248   2
   0  -4   1 36.2650 7.83076   7
   0  -4   1 11.4983 4.51719   8
   0  -4   1 40.1700 8.95941   5
   4   0   1 71.3973 6.78218   1
   0   4   1 35.2628 7.72365   6
   4   0   1 53.3467 6.88624   3
   0  -4   1 43.4472 4.76096   6
   4   0   1 37.4395 6.49924   8
   4   0   1 41.1991 6.79671   5
   0  -4   1 46.0947 7.98525   4
  -4   0   1 59.2830 5.20335   1
   0  -4   1 54.7006 8.17232   2
   0  -4   1 44.4977 7.68083   3
   0  -4   1 87.5718 8.24746   1
   0   4   1 42.9217 9.48138   3
  -4   0   1 28.2489 8.44823   5
   4   0   1 36.1272 6.08864   4
  -4   0   1 50.1701 8.22281   8
   0   4   1 34.6754 8.17592   8
   0   4   2 32121.4 3210.24   6
   0   4   2 34477.4 3210.26   2
  -4   0   2 36147.8 3209.80   6
   4   0   2 34044.9 3210.18   3
   4   0   2 35124.5 3209.59   5
   0  -4   2 34887.9 3209.84   4
   4   0   2 35773.6 3210.02   6
   4   0   2 34085.5 3210.14   2
   4   0   2 34575.1 3209.93   7
   0   4   2 33610.7 3209.86   3
   0  -4   2 35082.0 3210.35   2
   0  -4   2 35098.2 3210.34   7
   0   4   2 34540.5 3209.67   4
  -4   0   2 34074.4 3209.45   1
   4   0   2 34914.1 3208.88   4
  -4   0   2 35318.0 3210.35   8
   0  -4   2 34320.9 3210.08   1
   0  -4   2 34684.4 3208.83   6
   4   0   2 35707.5 3209.68   8
  -4   0   2 35156.9 3210.43   4
  -4   0   3 276.484 35.1837   8
   0   4   3 474.770 36.3278   2
   4   0   3 398.509 36.0529   3
   0   4   3 354.744 35.1124   3
   4   0   3 543.732 36.7917   2
   0   4   3 287.005 33.9142   4
  -4   0   3 329.606 35.5632   5
  -4   0   3 318.089 35.3907   4
   0  -4   3 332.406 34.3234   4
   0  -4   3 282.225 33.1301   6
   0   4   3 310.446 33.0416   7
  -4   0   3 444.522 34.7406   3
  -4   0   3 466.098 33.7836   2
  -4   0   3 531.739 35.3482   1
   4   0   3 272.939 34.5743   7
  -4   0   3 323.390 34.7081   6
   4   0   3 308.527 34.2114   8
   0  -4   3 317.991 36.1791   5
   4   0   3 313.918 33.9715   5
   0   4   4 1506.82 139.408   7
   0   4   4 1478.50 139.820   4
   0  -4   4 1602.06 141.843   5
   0  -4   4 1558.06 139.506   6
   0  -4   4 1503.52 139.938   4
   4   0   4 1533.43 140.852   7
  -4   0   4 1427.76 140.783   5
  -4   0   4 1523.71 140.921   8
  -4   0   4 1349.58 140.175   3
   4   0   4 1520.87 140.250   5
  -4   0   4 1402.03 140.446   1
  -4   0   4 1512.15 140.599   6
  -4   0   4 1669.27 140.969   7
  -4   0   4 1465.98 140.955   4
   0   4   4 1460.32 141.024   2
   0   4   4 1512.02 140.943   3
   4   0   4 1485.46 141.454   3
  -4   0   4 1407.55 139.541   2
   0  -4   5 113.193 22.3968   5
   0  -4   5 73.2746 21.6270   7
  -4   0   5 119.383 20.0801   5
   0  -4   5 105.535 16.6205   4
   0   4   5 202.096 24.8479   1
   4   0   5 72.3866 17.9109   5
  -4   0   5 150.451 20.2809   1
  -4   0   5 79.7799 19.6312   6
   0   4   5 157.701 21.7767   2
  -4   0   5 130.293 17.2458   2
   0   4   5 90.0396 16.7250   7
  -4   0   5 137.055 19.6597   4
   0   4   5 141.486 21.0947   3
  -4   0   5 118.107 19.7064   3
   4   0   5 109.818 20.9373   7
  -4   0   5 98.0117 19.8820   8
   4   0   5 147.495 23.2261   3
   0   4   5 129.109 14.4610   5
  -4   0   5 112.618 20.1833   7
   0   4   6 1146.84 110.683   2
   0   4   6 1092.34 107.462   5
  -4   0   6 1091.37 109.839   4
  -4   0   6 1139.46 110.034   1
   0  -4   6 1183.08 110.925   3
   0  -4   6 1186.13 108.479   4
  -4   0   6 1063.65 108.850   2
   0   4   6 1243.47 111.133   3
  -4   0   6 1152.26 109.531   8
   4   0   6 1043.39 110.182   7
   4   0   6 982.409 110.640   2
   0  -4   6 1194.61 111.674   5
   0  -4   6 1123.57 111.209   7
  -4   0   6 1204.81 110.059   5
  -4   0   6 1158.37 109.821   3
   0   4   6 1117.89 108.632   7
  -4   0   6 1337.69 110.862   7
   4   0   6 1205.56 109.347   5
   0   4   6 1073.99 111.106   1
  -4   0   6 1184.58 110.077   6
   0  -4   7 141.035 21.4036   4
   0   4   7 195.880 28.3781   3
   0   4   7 182.024 23.7321   7
   4   0   7 121.500 23.6649   5
  -4   0   7 151.627 24.6224   4
  -4   0   7 221.052 26.5603   1
   4   0   7 228.227 28.6041   2
   0  -4   7 146.825 27.7408   5
   0   4   7 267.267 29.3958   1
  -4   0   7 258.073 24.5511   2
  -4   0   7 190.753 25.8677   3
  -4   0   7 187.276 25.6108   5
   0  -4   7 125.848 27.1477   7
   4   0   7 168.852 27.4845   7
   0  -4   7 236.696 27.9305   3
  -4   0   7 164.411 27.3838   7
  -4   0   7 144.476 23.3069   8
   0   4   7 162.770 20.9836   5
   0   4   7 262.094 27.9538   2
  -4   0   8 549.848 63.5960   4
   0   4   8 590.989 66.6767   3
   0   4   8 607.276 60.6903   5
   0   4   8 640.988 62.5987   7
   4   0   8 640.098 65.5823   7
   0  -4   8 587.163 66.5443   7
  -4   0   8 651.963 65.3625   7
   4   0   8 651.267 66.2151   2
   0   4   8 662.524 65.6626   2
   0  -4   8 545.971 60.7302   4
   0   4   8 549.928 65.9391   1
  -4   0   8 632.428 64.8384   3
   0  -4   8 572.782 65.9543   3
  -4   0   8 673.391 63.3320   2
  -4   0   8 590.762 64.1501   5
   0  -4   8 672.396 67.2637   5
   4   0   8 687.120 63.8742   5
   0  -4   9 497.897 56.3851   3
   0  -4   9 357.776 46.8309   4
   4   0   9 339.169 51.7472   5
  -4   0   9 400.830 54.0478   7
   4   0   9 654.546 58.3913   2
   0  -4   9 444.814 57.6286   5
   4   0   9 358.557 54.0009   7
   0   4   9 683.230 59.7784   1
  -4   0   9 495.100 53.6788   3
  -4   0   9 360.068 51.7333   5
   0   4   9 527.717 57.5365   3
   0   4   9 652.085 56.3948   2
   0   4   9 438.384 51.2350   7
   0  -4   9 365.258 56.7566   7
   0   4  10 11.2687 26.8227   1
   4   0  10-7.91003 22.5084   5
   4   0  10 47.2327 26.2102   2
   0   4  10-16.0400 26.5736   3
   0   4  10 15.0810 22.1610   7
   0  -4  10 54.8090 29.1998   5
  -4   0  10-4.67794 24.0840   3
  -4   0  10 20.7053 23.0814   5
  -4   0  10 51.1952 25.5186   7
   0   4  10-22.5116 26.1003   2
   0  -4  10 43.3828 29.2100   7
   4   0  10-14.5369 27.0039   7
   0  -4  10 7.73118 28.7768   3
   4   0  10-34.0328 28.5294   3
   0   4  11 27.5994 26.6186   2
   0  -4  11 20.2810 30.1455   3
  -4   0  11-14.8943 26.6554   7
   4   0  11 55.4292 27.8288   2
  -4   0  11 18.1906 23.6165   5
   4   0  11 16.2149 26.9938   7
   0  -4  11 23.9979 29.5707   7
   0   4  11 64.8797 29.9234   3
   0  -4  11 37.3635 30.1044   5
  -4   0  11 70.9380 28.0188   3
   4   0  11 40.7097 32.3454   3
   0   4  11 25.5922 24.6392   7
   0   4  11 21.9865 29.3835   1
   4   0  12-17.9626 27.7331   7
   0   4  12 14.9285 27.5036   2
   0  -4  12 25.6155 29.2437   3
   0  -4  12-23.0996 34.6489   7
   0   4  12 22.5341 29.9033   3
   0  -4  12 15.2310 31.4951   5
  -4   0  12 26.3032 30.0135   3
   4   0  12-20.5002 32.9483   3
  -4   0  12 13.5302 30.1525   7
   0  -4  13-25.5835 29.7113   5
   0   4  13 3.21741 29.9750   2
  -4   0  13 11.6809 28.8131   7
   0   4  13 3.48826 32.8534   3
   4   0  13-11.1193 35.3753   3
   4   0  13-55.3166 35.1220   7
  -4   0  13-25.6773 31.7446   3
   0  -4  13 39.3212 34.3865   7
   0  -4  14-26.9153 40.8903   7
   4   0  14-17.6060 34.2129   7
   0   4  14 22.5997 34.2958   3
   4   0  14 39.9540 37.5175   3
   0   4  14-20.7208 31.8062   2
   0   4  15 4.01876 35.7680   3
   0  -4  15-36.9223 43.1902   7
   4   0  15-21.3265 38.9781   3
   4   1 -15 35.9807 33.6678   1
  -4  -1 -15-62.8159 40.2778   1
  -4  -1 -15-39.6532 34.6407   2
  -1   4 -15 22.1323 39.0004   3
   4   1 -15-50.1176 36.7978   3
  -1   4 -15-19.1064 39.9532   1
  -4  -1 -15 17.4007 31.7780   6
  -1   4 -15 65.0543 37.7371   2
   1  -4 -15 18.0963 34.1690   6
   1  -4 -15 4.38098 37.1426   1
   4   1 -14 25.8186 32.2968   1
   4   1 -14-23.6538 36.5122   3
  -4  -1 -14-29.1360 31.6932   6
  -1   4 -14 37.1124 36.3325   2
  -4  -1 -14 17.6654 38.9119   1
   1  -4 -14-20.6936 33.0825   6
  -4  -1 -14-8.21269 34.1114   2
  -1   4 -14-13.1367 33.6187   1
   1  -4 -14 12.2889 35.4174   1
   1  -4 -13 45.5928 33.3885   1
  -1   4 -13-11.9788 33.1851   1
   1  -4 -13-3.26247 30.7355   6
   4   1 -13 13.5203 30.2554   1
  -4  -1 -13 11.9575 30.1486   6
   4   1 -13 3.06661 26.6196   2
   1  -4 -13 10.8676 30.1689   8
  -1   4 -13 54.2425 34.0475   2
  -4  -1 -13-16.0448 37.0605   1
   4   1 -12 51.0311 27.5466   6
   1  -4 -12-13.9929 31.4921   1
  -1   4 -12 14.3466 32.6672   2
  -1   4 -12-14.2922 31.1015   1
   1  -4 -12 30.5987 30.9249   6
  -4  -1 -12-3.62671 36.4775   1
   4   1 -12 9.24561 29.1858   1
   1  -4 -12-7.86842 26.3242   8
   4   1 -12-8.55120 26.4861   2
  -4  -1 -12 30.1578 27.7111   6
  -1   4 -11 31.7950 28.5650   1
   1  -4 -11-12.4573 25.9686   8
   4   1 -11-7.79193 26.0955   2
  -4  -1 -11 7.50624 26.6479   6
   4   1 -11 16.6193 26.2608   1
  -4  -1 -11 10.6585 20.4814   8
  -1   4 -11 13.2866 19.2762   6
  -1   4 -11 19.8055 28.3937   2
   1  -4 -11 42.7231 28.7444   6
   4   1 -11 45.8488 23.1776   8
  -4  -1 -10 15.7785 23.9364   6
   4   1 -10 14.8163 25.3125   1
   1  -4 -10-15.7779 27.1371   6
   1  -4 -10-32.8995 25.9412   8
   4   1 -10-10.7072 23.6885   6
  -1   4 -10 62.0458 29.5569   1
   4   1 -10 63.5212 25.1404   2
  -4  -1 -10-1.63777 19.1938   8
   4   1 -10 5.62632 20.4231   8
  -1   4 -10 5.06123 19.4925   6
  -1   4 -10 53.4395 30.7029   2
  -1   4  -9 155.710 23.2672   8
   4   1  -9 206.479 31.6701   6
  -4  -1  -9 226.262 29.7996   8
   4   1  -9 182.875 33.7951   1
  -1   4  -9 153.703 36.7587   1
   1  -4  -9 191.205 25.6422   4
   4   1  -9 184.331 29.0851   8
   1  -4  -9 193.648 37.7537   6
  -1   4  -9 131.313 26.3758   6
   1  -4  -9 145.182 33.7062   8
   4   1  -9 162.522 33.6197   2
  -1   4  -9 140.995 38.1541   2
  -4  -1  -9 209.155 33.5270   6
  -1   4  -8 121.260 18.0190   8
   4   1  -8 168.150 26.8374   1
   1  -4  -8 116.690 26.4226   8
   1  -4  -8 117.141 20.4804   4
  -1   4  -8 101.387 21.7742   6
  -1   4  -8 207.331 28.7432   1
   1  -4  -8 147.852 30.2062   6
  -4  -1  -8 236.018 31.2509   1
   4   1  -8 128.504 25.3673   6
  -1   4  -8 157.358 30.1255   2
   4   1  -8 178.888 27.0942   2
  -4  -1  -8 117.410 25.9968   6
  -4  -1  -8 105.206 23.0574   8
   4   1  -8 94.3322 23.8883   8
   4   1  -7 888.575 86.9051   6
  -4  -1  -7 965.244 86.0562   8
   1  -4  -7 854.374 85.1194   4
   4   1  -7 939.729 87.8370   1
  -1   4  -7 872.311 85.3775   6
  -1   4  -7 896.308 89.3444   2
  -1   4  -7 817.061 83.7642   8
   4   1  -7 885.119 87.1800   2
  -4  -1  -7 941.529 88.9115   1
  -1   4  -7 890.669 88.2707   1
   1  -4  -7 923.621 88.5505   8
  -1   4  -7 864.868 84.2289   8
   1  -4  -7 951.557 89.1908   6
  -4  -1  -7 857.321 87.5623   6
  -4  -1  -6 708.298 74.5959   8
  -1   4  -6 713.912 72.5323   8
  -4  -1  -6 572.872 75.5188   6
   1  -4  -6 752.015 73.0682   5
  -1   4  -6 756.925 74.1098   6
  -1   4  -6 1187.72 78.9523   1
   1  -4  -6 653.040 76.7724   6
   1  -4  -6 695.724 73.6869   4
  -1   4  -6 680.003 72.0157   8
   4   1  -6 1042.57 76.1394   2
   1  -4  -6 712.416 76.9528   8
  -4  -1  -6 1202.86 79.1598   1
  -1   4  -6 1015.64 79.3414   2
  -4  -1  -5 7508.09 753.855   1
   1  -4  -5 7966.55 751.892   7
  -1   4  -5 7422.74 753.940   1
  -1   4  -5 8517.13 751.486   8
  -1   4  -5 8354.34 751.934   4
  -4  -1  -5 8025.33 752.817   8
  -1   4  -5 8160.42 751.214   8
  -1   4  -5 8216.70 752.298   6
   4   1  -5 8454.62 753.171   2
  -1   4  -5 7979.22 754.496   2
  -4  -1  -5 7753.17 753.628   6
   1  -4  -5 7672.72 752.420   4
   1  -4  -5 8341.42 751.881   5
   1  -4  -5 8258.95 754.326   8
  -4  -1  -4 57.8062 12.2385   1
  -4  -1  -4 16.3465 9.43800   8
  -1   4  -4 17.7415 4.09144   8
  -1   4  -4 18.5762 4.37438   8
   1  -4  -4 20.9338 6.22191   7
   4   1  -4 30.2753 8.75283   2
  -4  -1  -4 9.06522 10.4736   6
   1  -4  -4 19.3566 6.71375   5
   1  -4  -4 16.1469 6.82021   5
  -1   4  -4 35.4580 13.3607   2
   1  -4  -4 22.0441 9.57509   4
   4   1  -4 43.5786 8.42718   2
  -1   4  -4 16.0405 7.05314   6
   1  -4  -4 24.7847 13.2887   8
  -4  -1  -4 20.8258 7.30853   5
  -1   4  -4 18.4849 7.85634   4
   1  -4  -3 16328.4 1551.12   4
  -4  -1  -3 16321.8 1551.21   8
  -1   4  -3 17328.1 1550.75   4
  -1   4  -3 16555.4 1551.98   1
   1  -4  -3 17091.7 1551.15   3
   4   1  -3 17241.0 1551.07   1
   4   1  -3 16938.4 1551.34   8
   4   1  -3 16788.3 1550.60   2
   1  -4  -3 17037.6 1550.10   7
  -1   4  -3 17227.5 1550.58   6
   4   1  -3 16703.1 1551.35   3
   4   1  -3 16796.0 1550.75   2
   1  -4  -3 16579.7 1550.14   5
  -4  -1  -3 16652.2 1551.73   1
   4   1  -3 16780.6 1550.78   6
  -4  -1  -3 16891.3 1550.58   5
   4   1  -3 16936.9 1551.24   3
   1  -4  -3 15937.5 1550.15   5
   4   1  -2 1031.51 115.631   8
   1  -4  -2 1190.57 115.742   4
   1  -4  -2 1113.31 115.967   6
   4   1  -2 1079.49 115.216   6
   1  -4  -2 1052.40 114.566   5
   1  -4  -2 1697.36 116.385   2
  -1   4  -2 1179.31 116.221   3
  -1   4  -2 1425.17 116.245   3
   4   1  -2 1540.15 115.018   2
   4   1  -2 1864.72 115.534   1
   4   1  -2 1829.61 115.109   2
  -4  -1  -2 1047.97 115.667   8
  -4  -1  -2 1845.85 116.681   1
   4   1  -2 1132.73 115.461   3
   4   1  -2 978.819 115.456   7
  -1   4  -2 1046.73 115.815   7
  -4  -1  -2 1762.67 116.761   2
  -4  -1  -2 1001.73 115.416   7
  -4  -1  -2 1332.51 116.027   3
   1  -4  -2 1017.76 115.994   8
   1  -4  -2 1006.39 116.150   8
  -4  -1  -2 1026.25 115.076   5
  -1   4  -2 970.364 114.845   6
  -1   4  -2 1093.63 115.322   4
   1  -4  -2 1318.00 115.622   3
  -4  -1  -2 1829.45 116.733   1
  -1   4  -2 1749.89 117.222   1
  -4  -1  -2 1056.89 114.685   4
   1  -4  -1 63670.1 6383.13   3
   1  -4  -1 68580.1 6383.28   8
   1  -4  -1 70874.8 6383.18   8
  -4  -1  -1 69052.8 6382.69   1
   4   1  -1 70340.2 6383.12   8
  -4  -1  -1 66520.4 6382.89   2
  -1   4  -1 70106.1 6382.90   7
   4   1  -1 68371.4 6382.81   6
  -1   4  -1 69820.1 6383.02   5
  -4  -1  -1 67965.2 6382.74   5
   4   1  -1 69504.3 6383.22   4
  -4  -1  -1 70180.1 6382.65   4
  -1   4  -1 69031.7 6382.91   3
   1  -4  -1 69293.0 6382.73   2
  -4  -1  -1 68768.6 6383.15   6
  -4  -1  -1 69173.9 6382.65   1
   1  -4  -1 68715.8 6382.92   6
  -4  -1  -1 72352.3 6382.86   3
   1  -4  -1 68509.7 6382.32   5
  -1   4  -1 69220.0 6382.33   6
  -1   4  -1 69832.7 6382.86   4
   4   1  -1 69124.4 6382.44   3
   4   1   0 3369.49 311.174   3
   4   1   0 4946.89 310.677   2
  -1   4   0 4322.55 310.935   2
   4   1   0 2910.45 310.731   6
  -1   4   0 3032.75 310.239   7
  -4  -1   0 4889.95 310.564   2
  -4  -1   0 3162.83 310.889   4
   1  -4   0 4142.11 310.915   2
  -1   4   0 2869.48 310.440   6
   1  -4   0 2823.15 310.304   7
  -4  -1   0 3359.30 310.909   3
   1  -4   0 3025.93 310.585   5
   4   1   0 3311.78 310.856   4
   1  -4   0 2923.74 310.614   8
  -4  -1   0 2908.40 310.850   6
   1  -4   0 3247.69 310.439   3
  -1   4   0 3515.17 310.523   3
   1  -4   0 3200.05 310.894   4
  -4  -1   0 3026.56 310.910   5
   4   1   0 3123.81 310.927   5
   1  -4   0 2937.46 310.361   6
   1  -4   0 2800.21 310.507   8
  -1   4   0 3064.55 310.422   5
   1  -4   0 4886.94 311.219   1
   4   1   1 68185.5 5085.74   7
   1  -4   1 67981.6 5085.71   4
   4   1   1 65516.6 5085.58   3
   4   1   1 68051.5 5085.74   2
  -4  -1   1 69645.1 5086.10   8
  -4  -1   1 66492.4 5085.48   6
   4   1   1 67744.1 5085.31   4
   1  -4   1 66990.2 5085.02   6
   1  -4   1 65876.1 5085.92   1
   4   1   1 68148.7 5085.74   8
   4   1   1 67085.5 5085.47   5
  -4  -1   1 64989.4 5085.13   3
  -1   4   1 67923.1 5086.10   3
   1  -4   1 66926.3 5086.04   5
  -1   4   1 65558.9 5084.90   5
   1  -4   1 65493.1 5085.80   7
  -1   4   1 65614.9 5085.71   4
   1  -4   1 67197.5 5085.77   3
  -1   4   1 65536.2 5085.73   2
   1  -4   1 67896.4 5084.89   8
  -1   4   1 64709.1 5085.84   6
   1  -4   2 1765.82 113.125   1
  -4  -1   2 1959.14 111.642   1
  -4  -1   2 1206.11 112.548   5
  -1   4   2 1297.26 111.767   3
  -4  -1   2 1231.61 112.517   4
  -1   4   2 1727.07 112.939   2
   1  -4   2 1025.05 112.128   7
  -1   4   2 1083.35 110.720   5
  -1   4   2 1173.46 111.753   4
  -4  -1   2 1225.10 111.673   3
   4   1   2 983.049 111.518   7
   4   1   2 1163.39 110.685   4
   4   1   2 1050.81 111.112   5
  -4  -1   2 1055.16 111.314   6
   1  -4   2 1082.51 111.414   4
   4   1   2 1805.71 113.148   2
   4   1   2 1018.05 111.485   8
   1  -4   2 1021.62 110.760   6
  -4  -1   2 1050.04 111.941   8
   4   1   2 1218.42 112.189   3
   4   1   3 16777.4 175.651   3
  -4  -1   3 16524.9 174.954   4
  -4  -1   3 17078.2 173.100   8
  -1   4   3 15875.7 169.522   3
   1  -4   3 17632.2 177.393   5
  -4  -1   3 17873.0 168.818   6
   1  -4   3 17006.3 166.360   4
  -4  -1   3 17198.8 175.352   5
   4   1   3 16095.6 170.136   7
  -1   4   3 15847.0 172.397   2
  -4  -1   3 17124.3 167.289   1
   4   1   3 16851.9 175.770   2
   4   1   3 16654.4 164.621   5
  -1   4   3 16350.6 168.818   4
  -1   4   3 16801.0 177.612   1
   1  -4   3 17146.7 162.683   6
   4   1   4 32.5840 13.0772   3
  -4  -1   4 39.0834 9.96127   1
  -4  -1   4 15.8091 9.46400   6
   1  -4   4 22.6124 8.12300   4
  -4  -1   4 18.3093 11.6670   4
  -1   4   4 25.5392 11.2998   2
  -1   4   4 13.9843 11.1346   6
  -4  -1   4 42.2453 12.7986   7
   4   1   4 11.5290 8.61510   5
  -1   4   4 24.0595 10.4604   3
  -1   4   4 18.3814 7.03794   7
   1  -4   4 23.6342 8.44508   6
  -1   4   4 42.4700 14.3536   1
  -4  -1   4 12.9489 10.6818   8
   1  -4   4 20.4520 13.4368   5
   4   1   4 16.7215 10.2743   7
  -4  -1   4 26.9339 11.5682   5
  -1   4   5 7763.33 731.676   7
  -4  -1   5 7911.34 733.015   4
  -1   4   5 7156.43 733.563   1
  -1   4   5 7076.10 732.859   2
   1  -4   5 7776.63 733.622   7
  -4  -1   5 7678.10 732.842   3
   1  -4   5 8006.25 731.672   4
  -4  -1   5 8146.07 732.834   8
   4   1   5 7761.45 732.845   7
  -4  -1   5 7821.25 732.746   1
  -4  -1   5 8143.77 733.309   5
  -4  -1   5 9191.09 733.693   7
  -4  -1   5 8443.43 732.771   6
   4   1   5 8071.90 732.094   5
   1  -4   5 8177.81 733.927   5
  -1   4   5 7344.84 733.020   3
  -4  -1   6 750.985 78.1188   4
  -1   4   6 1198.13 80.5383   2
   1  -4   6 773.656 75.8724   4
  -4  -1   6 738.353 78.9032   7
  -4  -1   6 975.875 78.9806   3
  -4  -1   6 655.289 78.0360   5
   4   1   6 1092.51 81.3028   2
   4   1   6 727.802 78.0113   7
  -4  -1   6 708.619 77.3735   6
  -1   4   6 940.423 80.1211   3
  -1   4   6 1125.98 81.7609   1
  -1   4   6 671.394 76.1516   7
  -1   4   6 756.272 75.5882   5
  -4  -1   6 636.721 77.2166   8
   1  -4   6 762.265 79.5781   7
   1  -4   6 886.135 80.7395   5
   4   1   6 735.370 76.7059   5
  -1   4   7 906.533 88.1855   1
   1  -4   7 880.603 88.0457   7
   1  -4   7 800.284 83.5071   4
  -4  -1   7 815.979 86.1618   5
  -1   4   7 881.237 84.6533   7
  -1   4   7 885.908 87.3134   3
   4   1   7 913.301 85.2603   5
   4   1   7 932.162 87.9661   2
   1  -4   7 1005.98 88.4714   5
  -4  -1   7 831.803 85.5442   4
  -1   4   7 858.596 86.5962   2
  -4  -1   7 888.048 86.2814   3
  -1   4   7 848.944 83.6361   5
  -4  -1   7 864.325 85.3464   8
  -4  -1   7 987.091 87.4949   7
   4   1   7 858.246 86.0724   7
   1  -4   8 184.511 29.5346   3
   1  -4   8 124.086 19.8366   4
  -1   4   8 141.441 21.7451   5
   4   1   8 118.565 26.8086   7
   1  -4   8 142.326 30.9183   7
  -4  -1   8 159.533 27.8356   3
  -1   4   8 194.448 28.9507   2
   4   1   8 178.496 24.9918   5
  -1   4   8 291.038 32.9409   1
  -4  -1   8 111.081 28.3462   7
  -1   4   8 150.494 25.0968   7
  -1   4   8 141.803 29.0187   3
   1  -4   8 174.187 31.4618   5
  -4  -1   8 82.1576 27.2049   5
   4   1   8 245.737 32.0403   2
  -4  -1   8 165.218 25.7769   4
   4   1   9 191.848 36.8176   2
  -4  -1   9 143.989 32.7566   5
   1  -4   9 197.142 35.4434   7
  -4  -1   9 118.140 28.8015   4
  -4  -1   9 157.212 32.0632   3
  -4  -1   9 102.246 32.2807   7
   1  -4   9 131.292 35.1316   5
   4   1   9 131.220 36.6922   3
   4   1   9 160.929 29.5418   5
  -1   4   9 205.172 33.4465   2
  -1   4   9 161.938 29.6205   7
   4   1   9 162.486 33.1941   7
  -1   4   9 243.863 34.9722   3
   1  -4   9 143.984 34.5610   3
  -1   4   9 165.019 33.8498   1
  -1   4   9 172.766 24.8055   5
  -4  -1  10-9.55860 27.6151   7
  -1   4  10-11.1859 27.3424   1
  -4  -1  10 13.4945 20.9330   4
  -1   4  10-2.42337 25.5333   2
   1  -4  10 18.3233 26.9114   3
   1  -4  10 46.1178 28.4509   7
   4   1  10 14.0330 25.0671   7
   1  -4  10 23.2663 28.2149   5
   4   1  10 25.7865 27.8717   3
   4   1  10 40.3229 21.9086   5
  -4  -1  10 44.2694 24.7448   5
  -4  -1  10 49.3026 26.0899   3
   4   1  10-45.3204 29.0357   2
  -1   4  10 5.54917 21.0845   7
  -1   4  10 5.20383 26.5679   3
   1  -4  11 35.2913 30.5009   3
   4   1  11 20.5389 27.9575   2
  -1   4  11 47.8677 26.6493   2
  -4  -1  11 31.1320 27.4481   7
  -1   4  11 18.6361 28.2323   1
   4   1  11 22.0432 28.2883   3
  -1   4  11 5.74843 27.2431   3
   1  -4  11 8.46433 28.0665   5
  -4  -1  11 14.4900 25.7193   5
   4   1  11 5.21828 26.7643   7
   1  -4  11 12.0097 29.8626   7
  -4  -1  11-34.4772 26.7036   3
  -4  -1  12 19.7669 30.0598   7
   4   1  12 51.2615 29.8496   2
   4   1  12-24.0969 32.0587   3
  -1   4  12 15.7720 29.0657   3
   1  -4  12 81.4286 32.8374   3
   1  -4  12 33.1594 33.5059   7
  -1   4  12 23.1999 26.8130   2
   4   1  12 2.88994 29.7672   7
  -4  -1  12 26.0764 27.1804   5
  -4  -1  12 44.1307 29.6782   3
   1  -4  12 18.4529 31.6667   5
  -1   4  13 54.5852 32.4668   3
  -1   4  13-40.6695 30.7027   2
   1  -4  13-51.2613 34.2864   5
  -4  -1  13-18.5082 35.2817   7
   1  -4  13-7.12890 33.1042   3
   4   1  13 18.6185 33.1109   3
   1  -4  13 32.5273 34.3035   7
   4   1  13 56.5595 33.2732   7
  -1   4  14 3.69222 35.5078   3
   4   1  14 12.0067 37.4786   3
  -1   4  14-3.36823 29.7683   2
   1  -4  14-19.3987 39.5630   7
  -1   4  15-23.5668 40.3345   3
   4   1  15-17.1122 37.6989   3
   1  -4  15 20.6725 38.7231   7
   2  -4 -15 46.5793 36.2010   6
  -2   4 -15 19.5354 39.2831   1
  -4  -2 -15-17.4706 37.2776   2
  -4  -2 -15-25.0515 34.2402   6
  -2   4 -15-4.45404 38.1398   2
   4   2 -15 12.6130 37.8371   3
   2  -4 -15-38.5783 36.1004   1
   4   2 -15-8.07132 31.9771   1
  -4  -2 -14-4.40853 35.8551   1
  -2   4 -14-12.6855 38.1699   2
  -2   4 -14-31.4785 41.6528   1
   4   2 -14 14.8909 32.3983   1
   4   2 -14 3.98987 35.5903   3
  -4  -2 -14-16.7122 31.3060   6
   2  -4 -14-3.43605 30.9273   6
   2  -4 -14-4.01409 33.6955   1
   2  -4 -13-36.2272 29.6692   8
  -4  -2 -13-56.4525 39.3033   1
   2  -4 -13-67.2524 35.3968   1
  -4  -2 -13 27.8550 28.6198   6
   4   2 -13 3.74969 32.2431   3
  -2   4 -13-3.98475 32.7851   2
   2  -4 -13 9.77612 30.4658   6
   4   2 -13 3.40637 27.3333   1
  -2   4 -13-4.07431 34.4568   1
   4   2 -13-22.4389 28.0170   2
  -4  -2 -12 19.9412 26.3158   6
  -2   4 -12-51.6071 34.0490   2
   4   2 -12 18.5385 28.5411   1
   2  -4 -12-30.6736 27.9337   6
   4   2 -12-2.95278 27.8823   2
  -4  -2 -12 30.8714 23.5463   8
  -2   4 -12-47.3526 32.8808   1
   2  -4 -12-13.4421 27.7343   8
   2  -4 -11-12.8771 25.5327   8
  -4  -2 -11 26.8537 21.6638   8
  -2   4 -11-70.5136 34.4813   2
   4   2 -11 98.9353 27.0842   2
  -2   4 -11 29.3294 29.2455   1
   4   2 -11-27.6762 26.3452   1
   4   2 -11 22.2569 23.8261   6
  -4  -2 -11 2.60349 25.5579   6
  -2   4 -11 5.85299 20.0862   6
   2  -4 -11-5.72984 29.0855   6
  -2   4 -10-8.63417 27.5688   1
   2  -4 -10 5.26860 29.3233   6
   4   2 -10 16.2200 22.9323   6
  -4  -2 -10 18.8169 25.5231   6
   2  -4 -10 15.6141 17.1881   4
  -4  -2 -10 35.5006 20.6804   8
  -2   4 -10 6.91420 19.3065   6
   4   2 -10 50.6113 25.7208   2
   2  -4 -10-16.8914 26.7100   8
   4   2 -10 31.9829 25.4127   1
  -2   4 -10-15.2527 31.2807   2
   4   2 -10 19.2333 18.8018   8
   2  -4  -9 259.206 38.2963   4
  -2   4  -9 397.024 51.7638   2
   4   2  -9 319.242 41.7800   6
   2  -4  -9 231.284 44.1349   8
   4   2  -9 265.565 39.6157   8
   2  -4  -9 239.035 45.5592   6
  -4  -2  -9 214.388 43.4857   6
  -4  -2  -9 234.492 40.1387   8
  -4  -2  -9 391.816 48.9916   1
   4   2  -9 535.466 45.7749   1
   4   2  -9 473.599 46.0207   2
  -2   4  -9 420.843 46.9595   1
  -2   4  -9 369.317 40.7724   6
  -2   4  -8 31.0290 23.6381   1
  -4  -2  -8 32.3160 19.5244   8
  -2   4  -8 25.2326 11.7275   8
   4   2  -8 69.2019 23.1872   2
   4   2  -8 7.14174 17.5244   8
   2  -4  -8 18.5066 23.6017   8
  -2   4  -8 26.4891 17.5988   6
  -2   4  -8 7.31494 25.5864   2
  -4  -2  -8 49.2156 20.7029   6
   2  -4  -8 32.1513 16.1250   4
   2  -4  -8 73.5390 24.9437   6
  -4  -2  -8 6.76896 23.1804   1
   4   2  -8 42.7830 18.8271   6
   4   2  -8 37.0893 21.4741   1
   4   2  -7 185.709 23.2609   2
  -2   4  -7 117.791 15.8057   8
  -2   4  -7 210.352 27.1653   2
  -2   4  -7 245.900 25.7515   1
  -4  -2  -7 125.423 22.2296   6
   4   2  -7 161.854 22.4544   1
  -4  -2  -7 110.724 12.0263   4
  -2   4  -7 131.711 15.4264   8
  -4  -2  -7 119.615 21.0813   8
   2  -4  -7 116.695 18.3899   4
  -2   4  -7 152.961 19.3721   6
  -4  -2  -7 92.4111 11.9855   4
   2  -4  -7 132.641 24.7646   8
   2  -4  -7 134.972 25.7609   6
   4   2  -7 100.054 19.6891   6
  -4  -2  -6 3831.85 347.027   6
   4   2  -6 4054.86 346.681   2
  -4  -2  -6 3969.75 346.147   8
  -2   4  -6 3965.01 343.940   8
  -4  -2  -6 3551.24 343.069   4
  -4  -2  -6 3389.25 343.114   4
  -2   4  -6 3916.68 344.195   8
  -2   4  -6 3734.77 348.188   2
  -2   4  -6 3651.39 347.504   1
   2  -4  -6 4028.55 348.015   8
  -2   4  -6 3944.40 345.525   6
  -2   4  -6 3831.58 344.122   4
   4   2  -6 3814.92 346.370   1
   2  -4  -6 3755.95 345.611   4
  -4  -2  -5 1831.05 198.426   4
  -2   4  -5 2021.30 198.910   8
   2  -4  -5 2366.78 201.202   4
  -2   4  -5 2786.62 204.873   2
  -4  -2  -5 1947.09 198.398   4
   4   2  -5 3099.10 202.819   2
   2  -4  -5 2165.56 200.003   7
   4   2  -5 3742.86 203.316   1
  -4  -2  -5 2003.59 202.310   6
   2  -4  -5 2262.91 200.374   5
   2  -4  -5 2173.10 200.115   5
   2  -4  -5 2303.67 203.449   8
  -2   4  -5 3473.00 205.412   1
  -2   4  -5 2058.52 199.136   8
  -4  -2  -5 2014.75 201.301   8
  -4  -2  -5 2152.45 199.514   5
   4   2  -5 2504.65 203.369   3
  -2   4  -5 2213.82 199.493   4
  -2   4  -5 2250.52 200.532   6
   2  -4  -4 6673.32 614.562   5
  -2   4  -4 6795.35 614.465   4
   2  -4  -4 6684.05 614.430   7
   4   2  -4 6893.49 615.415   2
  -4  -2  -4 6710.50 614.315   5
   2  -4  -4 6768.72 614.640   5
   4   2  -4 6757.57 615.367   1
   2  -4  -4 6433.67 615.344   4
  -2   4  -4 6354.81 616.444   1
   4   2  -4 6628.88 615.016   2
   4   2  -4 6713.69 616.174   3
  -4  -2  -4 6513.67 615.509   8
  -2   4  -4 6684.19 613.759   8
  -4  -2  -4 6275.19 613.649   4
   2  -4  -4 7011.50 616.862   8
   4   2  -4 6818.78 614.717   6
  -2   4  -4 6713.94 614.980   6
   4   2  -3 392.333 25.3379   1
   2  -4  -3 233.718 25.5248   4
   4   2  -3 255.385 25.7729   3
   2  -4  -3 215.784 23.9605   5
  -4  -2  -3 220.926 25.7534   8
  -2   4  -3 202.099 24.0509   4
   4   2  -3 346.023 24.9293   2
   2  -4  -3 216.381 23.8837   5
   2  -4  -3 209.865 23.4974   7
   2  -4  -3 274.448 25.1703   3
   4   2  -3 342.360 25.1545   2
  -4  -2  -3 216.392 23.3057   4
   2  -4  -3 321.921 26.1264   2
  -4  -2  -3 193.556 23.7458   5
   4   2  -3 205.313 24.0263   6
   4   2  -3 411.048 25.6884   1
   4   2  -3 205.828 24.7721   8
  -2   4  -3 207.047 24.5617   6
  -2   4  -2 31900.4 2929.59   7
  -4  -2  -2 30934.9 2929.22   7
   2  -4  -2 31729.4 2929.98   8
   2  -4  -2 31522.2 2929.22   2
  -4  -2  -2 31855.2 2928.75   4
  -4  -2  -2 30907.1 2928.82   5
  -2   4  -2 31930.9 2929.03   4
  -2   4  -2 31563.2 2929.78   3
  -4  -2  -2 31160.1 2929.61   1
  -4  -2  -2 31715.1 2929.48   3
  -2   4  -2 31178.9 2930.03   2
  -4  -2  -2 33070.8 2929.77   2
   2  -4  -2 31285.4 2929.58   6
  -4  -2  -2 32688.3 2929.78   6
   4   2  -2 31527.3 2928.62   1
   2  -4  -2 31741.8 2929.44   1
   4   2  -2 32041.9 2928.72   1
   2  -4  -2 32150.3 2929.61   4
  -4  -2  -2 31540.0 2929.55   8
   4   2  -2 31424.9 2928.71   2
   2  -4  -2 32581.8 2928.99   3
   2  -4  -2 31540.4 2928.71   5
  -2   4  -2 31708.1 2929.62   3
   4   2  -2 31748.4 2929.40   8
  -2   4  -2 32029.4 2929.07   6
   4   2  -2 30882.9 2929.28   3
   4   2  -2 31605.5 2928.87   6
   4   2  -1 406.325 29.4339   2
   2  -4  -1 291.110 30.2782   6
   4   2  -1 296.964 29.9201   3
  -4  -2  -1 265.661 30.1666   7
   2  -4  -1 266.000 30.6596   8
   4   2  -1 254.726 30.1940   8
  -2   4  -1 254.055 29.5974   6
   4   2  -1 323.621 30.7520   4
  -2   4  -1 274.768 29.9607   5
   2  -4  -1 458.884 30.2728   2
   4   2  -1 264.670 29.7667   6
  -4  -2  -1 297.994 31.2034   3
  -4  -2  -1 264.168 29.9049   5
  -2   4  -1 279.111 29.9529   4
  -4  -2  -1 292.188 29.8833   4
  -2   4  -1 283.383 30.0066   7
   4   2  -1 285.237 30.7501   5
  -2   4  -1 308.661 30.1528   3
  -4  -2  -1 474.901 30.5038   1
  -4  -2  -1 259.098 30.2282   6
   2  -4  -1 317.789 30.1478   3
  -4  -2  -1 464.703 31.0121   2
  -2   4  -1 261.109 29.3998   8
   2  -4  -1 280.948 29.5471   5
  -2   4  -1 419.431 31.1521   2
   2  -4   0 26281.7 2408.39   4
  -4  -2   0 25857.6 2407.87   2
   2  -4   0 25240.4 2408.13   2
  -2   4   0 26565.2 2408.06   5
  -2   4   0 24948.3 2408.28   4
   2  -4   0 26328.6 2408.14   5
  -4  -2   0 26234.4 2408.32   6
   4   2   0 26533.1 2408.22   6
   4   2   0 23425.4 2408.99   3
  -2   4   0 26035.9 2408.08   2
   4   2   0 26265.7 2408.48   7
  -2   4   0 26176.6 2408.29   8
   2  -4   0 26787.2 2408.09   6
  -4  -2   0 26969.5 2408.38   3
   4   2   0 26049.1 2408.54   5
  -2   4   0 26435.7 2407.79   7
  -4  -2   0 25658.1 2408.43   4
  -2   4   0 26030.9 2408.14   6
   2  -4   0 26551.0 2407.90   7
  -2   4   0 26179.2 2407.77   3
   2  -4   0 26140.4 2408.27   8
  -4  -2   0 26032.5 2408.51   8
   4   2   0 26397.6 2408.40   4
  -4  -2   0 25110.0 2408.52   5
   4   2   0 26095.3 2407.99   2
   2  -4   0 25527.1 2407.82   3
  -2   4   1 320.089 30.5990   3
  -2   4   1 270.335 31.0974   8
   4   2   1 329.568 31.1912   3
   4   2   1 486.382 30.9277   1
  -4  -2   1 295.395 30.2442   3
  -2   4   1 290.935 31.0633   6
   2  -4   1 301.936 30.6835   3
  -4  -2   1 419.875 29.7796   2
   2  -4   1 287.844 30.6075   4
  -4  -2   1 275.623 30.1761   6
  -4  -2   1 282.104 30.8367   8
   4   2   1 275.847 30.5333   6
   4   2   1 275.736 30.2298   4
   4   2   1 415.165 31.4177   2
   2  -4   1 259.268 30.0639   6
   2  -4   1 268.261 30.7732   5
   4   2   1 246.267 30.6838   7
  -2   4   1 422.124 30.9924   2
   4   2   1 279.761 30.3238   5
  -2   4   1 492.314 31.6261   1
  -2   4   1 287.682 29.9237   5
   2  -4   1 259.797 30.5835   7
   2  -4   1 259.701 29.7308   8
   2  -4   1 375.627 31.6216   2
  -4  -2   2 32394.7 2979.43   4
  -2   4   2 32178.5 2979.36   1
  -2   4   2 32720.7 2979.08   4
   2  -4   2 30074.8 2979.20   1
   2  -4   2 32528.6 2978.54   4
  -2   4   2 32453.9 2978.95   2
   4   2   2 32188.7 2978.73   7
  -2   4   2 32359.3 2978.26   5
   4   2   2 33195.8 2979.14   1
   4   2   2 31889.4 2978.23   5
   4   2   2 32163.2 2978.07   4
   2  -4   2 32467.9 2978.39   6
   4   2   2 30721.4 2979.10   3
   2  -4   2 32644.6 2979.28   7
  -4  -2   2 32781.1 2979.02   8
  -4  -2   2 32549.0 2978.30   6
   4   2   2 31918.6 2978.88   8
   4   2   2 32200.6 2979.27   2
  -4  -2   2 32318.9 2978.34   2
  -4  -2   2 32075.3 2978.85   3
  -2   4   2 32307.1 2978.48   3
   4   2   3 216.938 13.7000   4
  -4  -2   3 191.348 16.6908   8
   4   2   3 352.682 20.8459   2
   2  -4   3 211.889 15.2170   4
  -4  -2   3 221.146 18.6242   7
   4   2   3 367.015 20.3255   1
  -2   4   3 433.290 21.7645   1
   2  -4   3 293.073 19.0191   3
   2  -4   3 211.211 15.2844   6
  -4  -2   3 193.094 15.7251   6
   4   2   3 211.333 14.8860   5
   2  -4   3 192.493 18.4429   5
   4   2   3 208.477 16.7672   7
  -2   4   3 6.97846 12.5628   7
  -4  -2   3 222.970 19.3257   5
  -2   4   3 258.778 17.0712   3
   4   2   3 255.954 18.8211   3
  -4  -2   3 218.398 18.1550   4
  -2   4   3 349.004 18.9434   2
  -2   4   4 7217.85 620.689   7
  -4  -2   4 7211.97 621.383   6
   2  -4   4 6769.36 619.986   8
   2  -4   4 6681.46 622.171   3
  -4  -2   4 7853.37 622.795   7
   4   2   4 6553.56 621.542   7
   4   2   4 6509.03 622.504   1
   2  -4   4 6859.12 622.494   5
   2  -4   4 6826.69 621.051   6
   4   2   4 6117.92 619.742   4
  -4  -2   4 6747.42 622.443   5
  -4  -2   4 6877.03 622.200   4
  -2   4   4 6464.46 621.744   2
   4   2   4 6694.22 620.743   5
  -4  -2   4 6931.92 621.757   8
   2  -4   4 6865.60 620.735   4
  -2   4   4 6532.49 621.728   3
  -2   4   4 6458.17 622.643   1
  -2   4   4 6843.74 622.673   6
  -4  -2   5 2144.07 223.920   5
   2  -4   5 2637.78 224.532   3
  -2   4   5 3600.84 226.558   1
  -2   4   5 2143.27 221.577   7
  -2   4   5 3583.04 224.990   2
  -4  -2   5 2150.43 222.681   8
   4   2   5 2245.35 221.683   5
   2  -4   5 2104.73 224.174   5
  -2   4   5 2797.17 224.074   3
   2  -4   5 2265.93 221.324   4
  -2   4   5 2341.00 224.509   6
   4   2   5 2078.47 222.665   7
  -4  -2   5 2290.37 224.128   7
   2  -4   5 1979.63 223.899   7
  -4  -2   5 2314.40 223.357   4
   4   2   5 3748.97 226.842   1
  -4  -2   5 2140.35 222.143   6
  -2   4   6 3627.29 360.591   1
  -4  -2   6 3807.98 358.951   6
  -2   4   6 4022.25 360.252   3
  -2   4   6 3888.77 359.826   2
   2  -4   6 3980.60 360.709   5
  -4  -2   6 3926.70 358.988   8
  -4  -2   6 4329.36 360.867   7
   4   2   6 3661.81 360.433   2
  -4  -2   6 3854.82 360.290   5
   4   2   6 4016.45 359.589   7
   4   2   6 3582.69 360.663   1
   2  -4   6 3680.18 357.588   4
  -2   4   6 3971.29 358.444   7
  -4  -2   6 3657.71 359.397   4
   2  -4   6 3854.45 360.686   7
   4   2   6 3885.34 358.345   5
   4   2   7 124.069 23.1681   7
  -4  -2   7 114.832 24.6119   5
  -2   4   7 190.412 24.3703   2
   2  -4   7 107.063 24.8385   5
  -2   4   7 139.899 20.7641   7
  -4  -2   7 111.709 19.6552   8
  -2   4   7 148.693 24.5678   3
  -4  -2   7 160.584 25.8368   7
   4   2   7 176.477 26.8306   2
   2  -4   7 123.902 17.1429   4
   4   2   7 108.492 19.4300   5
   2  -4   7 114.384 26.7349   7
  -4  -2   7 107.000 21.7145   4
  -2   4   7 145.572 19.0186   5
  -2   4   7 234.874 26.8827   1
  -4  -2   7 202.751 24.5212   3
  -2   4   8 31.5275 20.1600   2
  -2   4   8 62.1735 18.4788   7
  -4  -2   8 32.2849 19.0513   4
   2  -4   8 62.9028 25.6585   7
   2  -4   8 61.3166 12.9147   4
   2  -4   8 37.3719 23.6012   5
  -4  -2   8 53.5623 24.9610   7
  -2   4   8 48.9087 15.6186   5
  -2   4   8 30.8326 23.0102   1
  -4  -2   8-25.4708 23.0846   3
   4   2   8 35.1207 17.0730   5
  -4  -2   8 53.6767 23.2130   5
  -2   4   8 71.3723 22.8166   3
   4   2   8 23.2210 26.8555   3
   4   2   8 36.4117 20.5445   7
   4   2   8 35.0114 23.7047   2
   2  -4   9 304.658 47.0663   5
   4   2   9 286.888 40.3653   5
   4   2   9 434.493 48.3685   2
  -2   4   9 425.832 47.4622   1
   2  -4   9 332.045 47.8211   7
  -4  -2   9 313.179 40.7705   4
   4   2   9 282.879 43.7836   7
  -4  -2   9 400.889 46.3454   3
  -2   4   9 291.312 41.7352   7
  -2   4   9 433.827 45.3383   2
   4   2   9 411.720 49.5048   3
  -2   4   9 240.668 37.4870   5
  -4  -2   9 339.828 47.3027   7
  -2   4   9 290.566 44.6121   3
  -4  -2   9 297.142 45.7393   5
   2  -4  10-2.66380 29.0031   3
  -4  -2  10 44.9903 28.6703   7
   2  -4  10 24.7625 28.8409   7
  -2   4  10 70.7766 27.4746   3
   4   2  10 11.5466 30.0522   3
  -4  -2  10 28.5030 26.3973   3
  -2   4  10 2.76676 27.7736   1
  -4  -2  10 56.0696 27.3882   5
  -2   4  10 46.8920 24.2255   2
  -2   4  10 14.5244 22.7610   7
   2  -4  10-12.8407 27.0484   5
  -4  -2  10 1.90502 20.6293   4
   4   2  10 40.7252 26.6678   2
   4   2  10 18.0266 23.9087   7
  -4  -2  11-7.67167 24.9216   5
   2  -4  11-2.80317 27.7266   5
  -2   4  11 27.9661 26.9758   3
  -4  -2  11-43.3230 28.3133   7
  -2   4  11 21.5437 26.6214   1
   2  -4  11 2.97169 28.3664   3
   2  -4  11-3.03395 28.9602   7
  -2   4  11 30.9202 24.0761   2
   4   2  11-12.6788 28.6196   3
   4   2  11 32.6913 25.5371   7
   4   2  11 41.5488 26.9548   2
   4   2  12 27.8650 29.3294   7
   2  -4  12 3.02668 27.7297   5
   4   2  12-17.3157 32.8814   3
   2  -4  12-9.97606 31.6578   7
  -4  -2  12 17.8729 31.8898   7
  -2   4  12 27.5845 29.3343   3
  -2   4  12 5.60700 25.4661   2
   4   2  12-12.9420 30.1444   2
   2  -4  12 6.61176 31.8036   3
  -4  -2  12 41.3459 27.5979   5
  -4  -2  13 28.8636 31.5239   7
  -2   4  13 6.07356 28.4145   2
  -2   4  13 23.3626 31.2180   3
   4   2  13 35.0056 31.0822   2
   4   2  13 3.02631 29.6790   7
   4   2  13 15.0125 34.3159   3
   2  -4  13 3.62312 30.7677   3
   2  -4  13 47.3010 33.4611   7
   2  -4  14 35.3129 37.3845   3
   4   2  14-4.01121 36.8822   3
   2  -4  14 43.2312 38.7093   7
  -2   4  14 3.27142 29.4090   2
  -2   4  14 32.4819 32.1435   3
   2  -4  15 25.0793 39.5807   7
   4   2  15-12.8679 39.4042   3
  -2   4  15-34.7815 35.6061   3
   4   3 -15 44.8351 36.2431   1
  -3   4 -15-45.1966 46.2495   1
   3  -4 -15 50.3268 37.2922   1
  -4  -3 -15-25.5734 32.8771   6
   4   3 -15 25.3609 38.4852   3
  -3   4 -15-18.3744 38.5539   2
   3  -4 -15-10.6792 34.0560   6
  -3   4 -14 26.1365 38.2620   2
   3  -4 -14-13.6516 33.2442   6
   4   3 -14 8.06291 35.8477   3
  -3   4 -14 45.8506 37.2857   1
  -4  -3 -14 6.89686 33.9278   6
   4   3 -14-11.3147 32.2942   1
   3  -4 -14-11.7892 33.8679   1
  -4  -3 -14-22.1315 36.5125   1
   4   3 -13 34.2250 35.6152   3
   3  -4 -13-14.1882 27.7852   8
   4   3 -13-13.1938 31.3952   2
   3  -4 -13-14.6429 33.0452   1
  -4  -3 -13 19.2368 30.4361   6
   3  -4 -13-6.50212 30.7802   6
  -3   4 -13 37.3598 37.2495   1
   4   3 -13-6.87408 28.4571   1
  -3   4 -13 69.2988 36.6880   2
  -4  -3 -12-2.20752 23.5751   8
   4   3 -12 3.07108 27.5553   2
  -3   4 -12-8.88080 22.5358   6
   4   3 -12 7.09606 30.6767   3
   4   3 -12-3.10713 29.0171   1
  -4  -3 -12 26.4535 29.0612   6
   3  -4 -12-2.76142 26.2102   8
  -3   4 -12 53.0824 32.4658   2
   3  -4 -12-15.3424 27.7767   6
  -3   4 -12-22.4660 31.7452   1
   4   3 -11-4.15727 22.4554   6
  -4  -3 -11-6.19637 21.9904   8
  -3   4 -11-6.01304 18.9525   6
  -3   4 -11-34.4985 33.8740   2
   4   3 -11-16.6910 25.9292   1
  -4  -3 -11-35.0370 28.1294   6
   4   3 -11-2.80578 27.4882   2
  -3   4 -11-16.6025 29.0033   1
   3  -4 -11-34.1666 26.2603   8
   4   3 -11 13.0675 30.8603   3
   3  -4 -11 19.9715 28.9787   6
  -4  -3 -10 53.2381 22.6486   8
   4   3 -10 64.1678 26.7496   1
  -3   4 -10 53.7104 34.3861   2
   3  -4 -10 57.1316 26.5285   8
   3  -4 -10 91.6336 29.9460   6
  -3   4 -10 60.7003 21.8785   6
  -4  -3 -10 73.6519 29.4976   6
   4   3 -10 27.6090 19.9356   8
   4   3 -10 86.7097 24.0039   6
   4   3 -10 78.5270 28.8473   2
  -3   4 -10 73.7995 31.1316   1
   4   3 -10 59.2549 30.4922   3
   3  -4 -10 38.3139 20.2043   4
   3  -4  -9 729.758 74.9613   8
  -3   4  -9 697.189 77.7865   2
   4   3  -9 742.645 71.5375   6
   3  -4  -9 713.303 70.7174   5
  -4  -3  -9 596.378 75.9141   1
   4   3  -9 676.561 73.2414   1
   3  -4  -9 673.437 75.1422   6
  -3   4  -9 560.421 74.2887   1
  -4  -3  -9 668.926 71.7880   8
  -3   4  -9 705.501 70.3807   6
   3  -4  -9 626.037 68.9969   4
  -4  -3  -9 669.583 73.7346   6
   4   3  -9 651.492 69.6568   8
   4   3  -9 721.647 77.3978   3
   4   3  -9 698.970 73.7789   2
  -3   4  -8 250.913 38.3764   2
  -3   4  -8 297.277 37.1607   1
   4   3  -8 203.639 27.4292   8
   4   3  -8 267.908 33.3565   2
   4   3  -8 212.842 36.0498   3
  -4  -3  -8 180.435 31.3178   8
   3  -4  -8 222.201 29.4594   5
  -3   4  -8 175.849 27.7270   6
   3  -4  -8 227.212 35.7398   6
   3  -4  -8 138.938 32.5978   8
  -4  -3  -8 205.446 34.4349   6
   3  -4  -8 184.887 28.1877   4
   4   3  -8 224.417 30.2828   6
   4   3  -8 340.199 33.4243   1
  -3   4  -8 172.568 23.7370   8
   3  -4  -7 970.950 91.0389   8
   4   3  -7 997.040 91.4919   3
   4   3  -7 959.625 87.9724   6
  -4  -3  -7 905.566 88.8191   8
  -3   4  -7 863.609 87.3910   6
  -4  -3  -7 895.978 84.5405   4
   3  -4  -7 897.365 87.7024   5
  -4  -3  -7 868.489 89.8840   6
  -3   4  -7 962.063 92.2668   2
   4   3  -7 884.125 88.9420   1
  -3   4  -7 868.602 85.4795   8
   4   3  -7 902.415 89.5524   2
   3  -4  -7 891.216 87.8581   4
  -3   4  -7 910.630 90.7499   1
  -4  -3  -6 196.100 21.1840   4
  -4  -3  -6 188.535 27.5934   8
   3  -4  -6 189.683 25.4779   5
  -3   4  -6 219.369 22.2144   4
   4   3  -6 407.666 28.6013   1
  -3   4  -6 209.498 22.2696   8
  -3   4  -6 201.471 25.2219   6
   3  -4  -6 207.981 30.7826   8
  -4  -3  -6 167.620 21.0216   4
   3  -4  -6 209.434 26.4531   4
   4   3  -6 230.145 30.6903   3
  -4  -3  -6 243.542 29.3333   6
  -3   4  -6 309.716 31.5213   1
   4   3  -6 324.942 29.4304   2
   3  -4  -5 13022.4 1169.72   8
   3  -4  -5 11865.6 1167.52   5
  -4  -3  -5 12494.9 1166.21   4
  -4  -3  -5 12538.1 1168.49   8
   3  -4  -5 12202.7 1168.21   4
  -3   4  -5 12738.4 1166.54   4
  -3   4  -5 12649.3 1166.42   8
   3  -4  -5 12928.0 1167.32   7
   4   3  -5 12450.2 1168.40   2
  -3   4  -5 12977.6 1167.88   6
  -4  -3  -5 12877.4 1166.58   5
   4   3  -5 12330.4 1169.13   3
   4   3  -5 12622.7 1168.14   1
   4   3  -4 15.3288 9.22645   1
   3  -4  -4-1.60156 7.61781   7
   4   3  -4 0.70276 8.43557   8
  -3   4  -4 2.71567 4.92475   8
  -4  -3  -4 28.9411 12.5450   8
   4   3  -4 14.4239 10.1417   2
  -4  -3  -4 1.87885 5.63267   5
   3  -4  -4 5.74043 10.2153   4
  -4  -3  -4 5.80994 5.79560   4
   4   3  -4 16.8913 11.8233   3
  -3   4  -4 22.3008 6.85081   4
  -3   4  -4 6.95065 8.82342   6
   3  -4  -4-0.60215 8.19261   5
   4   3  -4 6.26933 6.60605   6
   3  -4  -4 7.73306 8.29784   5
   4   3  -3 2728.48 252.554   1
  -4  -3  -3 2747.50 252.025   5
   4   3  -3 2719.14 252.745   8
  -4  -3  -3 2751.28 252.117   4
  -4  -3  -3 2787.97 253.925   6
   3  -4  -3 2659.32 253.425   4
  -3   4  -3 2777.52 252.256   4
  -3   4  -3 2691.76 254.304   2
  -4  -3  -3 2801.64 253.534   8
   3  -4  -3 3103.60 252.663   5
  -3   4  -3 2807.34 253.061   6
   3  -4  -3 2520.84 251.965   7
   4   3  -3 2549.57 252.447   1
  -3   4  -3 2744.53 251.867   8
   4   3  -3 2661.05 253.381   3
   4   3  -3 2779.87 252.815   2
   4   3  -3 2737.86 252.089   6
   3  -4  -3 2579.99 252.720   2
   3  -4  -3 2583.11 252.480   3
  -3   4  -2 1078.56 109.643   4
   3  -4  -2 1551.21 110.169   2
  -3   4  -2 1367.53 110.877   3
  -4  -3  -2 1077.14 109.396   5
   3  -4  -2 1028.96 109.616   5
  -3   4  -2 1564.94 111.973   2
   3  -4  -2 1044.42 109.019   7
   4   3  -2 1641.07 109.834   1
  -4  -3  -2 1957.09 111.645   1
   4   3  -2 982.728 109.895   8
   3  -4  -2 1049.52 110.658   4
   4   3  -2 1201.25 110.341   3
   4   3  -2 1525.02 109.925   2
  -3   4  -2 1035.98 110.054   6
  -4  -3  -2 1145.52 109.726   4
  -4  -3  -2 1120.44 110.858   6
   4   3  -2 1029.17 109.337   6
   3  -4  -2 1278.31 109.580   3
  -4  -3  -2 1034.88 109.952   7
  -3   4  -2 954.166 109.146   8
   4   3  -1 74831.0 6689.78   5
   3  -4  -1 71539.4 6688.39   7
  -3   4  -1 73835.5 6689.06   4
  -4  -3  -1 73435.8 6689.19   4
   3  -4  -1 73966.5 6689.69   8
  -3   4  -1 73154.6 6688.99   3
  -3   4  -1 71927.3 6689.03   3
  -3   4  -1 73514.6 6689.18   5
  -3   4  -1 73690.7 6689.50   1
  -4  -3  -1 75241.3 6688.95   1
  -4  -3  -1 65541.0 6690.15   3
  -3   4  -1 71874.0 6689.12   6
  -4  -3  -1 73305.9 6689.34   6
  -3   4  -1 71433.7 6688.91   8
  -4  -3  -1 74297.0 6689.28   2
   3  -4  -1 71277.6 6688.91   5
   4   3  -1 73010.9 6688.79   6
  -3   4  -1 72321.4 6689.50   2
   4   3  -1 71940.7 6689.08   3
   3  -4  -1 72864.3 6688.44   3
   3  -4  -1 72991.6 6689.09   1
   4   3  -1 72595.6 6689.19   8
  -4  -3  -1 72617.6 6689.14   7
  -4  -3  -1 70302.4 6689.06   5
   3  -4  -1 71546.7 6688.71   2
  -3   4  -1 73270.2 6689.10   7
   4   3  -1 70736.8 6689.52   4
   3  -4  -1 73588.6 6689.24   6
   4   3  -1 71641.5 6688.62   2
  -4  -3  -1 67911.0 6689.34   8
   4   3   0 12.0661 5.65557   2
   3  -4   0 11.8150 5.77353   4
   4   3   0 9.70016 5.89696   8
  -4  -3   0 6.77142 3.16865   1
   3  -4   0 3.27845 4.23265   7
   4   3   0 7.46081 4.55179   6
  -4  -3   0 1.80582 5.69412   4
   3  -4   0 2.83147 4.94165   2
   4   3   0 6.22027 6.49104   4
   3  -4   0 6.01134 5.97125   1
  -3   4   0 2.88695 4.04062   7
   4   3   0 8.78138 7.24755   7
  -3   4   0 12.6584 6.01622   1
   4   3   0-1.86503 6.97414   5
  -3   4   0 4.66942 3.56864   3
   3  -4   0 10.0491 5.72199   8
   4   3   0 2.66617 8.63041   3
  -3   4   0-0.53829 5.96404   4
   3  -4   0 2.41259 5.07339   6
   3  -4   0 7.83741 5.22417   5
   3  -4   0 3.19916 3.75811   3
  -4  -3   0 1.51673 6.19635   3
  -3   4   0 6.07678 4.75411   5
  -4  -3   0 12.3995 5.13307   2
  -4  -3   0 5.61214 5.64320   8
   4   3   0 10.2533 6.56207   5
  -3   4   0 2.23112 5.93195   8
  -3   4   0 2.01269 4.99935   2
  -3   4   0 2.91023 5.28415   6
  -4  -3   0 6.73530 4.56955   6
   4   3   0 13.2540 3.63797   1
  -3   4   1 71642.6 6568.31   7
   4   3   1 71430.3 6569.30   2
  -3   4   1 71422.5 6569.29   6
  -4  -3   1 69083.1 6568.60   6
   3  -4   1 71089.6 6569.44   2
  -4  -3   1 69502.4 6568.86   3
  -3   4   1 70573.9 6568.43   3
   3  -4   1 72195.3 6568.67   8
   4   3   1 69628.7 6569.13   6
  -4  -3   1 69733.1 6569.19   8
   4   3   1 72345.6 6568.91   4
   3  -4   1 70463.3 6568.96   6
   4   3   1 71951.9 6568.90   1
  -4  -3   1 69701.0 6568.42   2
   4   3   1 71612.5 6569.13   7
   3  -4   1 72635.4 6568.96   4
  -4  -3   1 71484.1 6569.55   5
  -3   4   1 70423.9 6568.75   5
  -3   4   1 72145.3 6569.58   8
   4   3   1 73248.4 6568.83   5
  -3   4   1 70360.0 6569.09   1
   4   3   1 74611.0 6569.52   3
  -3   4   1 69451.7 6568.70   2
   3  -4   1 71747.4 6569.12   7
  -3   4   2 1258.12 110.971   3
  -4  -3   2 985.936 110.532   6
   4   3   2 1985.93 113.172   1
  -4  -3   2 1745.20 111.064   1
  -4  -3   2 1481.26 111.482   2
  -3   4   2 1614.74 112.032   2
  -4  -3   2 1174.08 111.807   3
   3  -4   2 999.076 111.119   6
  -3   4   2 1677.61 113.005   1
   3  -4   2 1094.34 111.119   4
   4   3   2 1008.45 110.603   5
   3  -4   2 1450.82 112.250   3
   4   3   2 1701.27 113.289   2
   4   3   2 1078.76 111.329   7
   3  -4   2 980.188 111.858   7
   4   3   2 1104.58 110.817   4
   3  -4   2 952.959 110.410   8
  -4  -3   2 1019.69 111.446   8
  -3   4   2 1058.02 111.062   5
  -4  -3   2 1077.46 112.254   4
  -4  -3   3 2781.40 255.710   8
   3  -4   3 2753.55 254.986   4
   3  -4   3 2721.84 254.408   8
   3  -4   3 2827.58 256.611   5
   4   3   3 2559.88 256.412   2
   4   3   3 2747.85 254.709   4
  -3   4   3 2678.99 256.532   1
   3  -4   3 2816.27 255.382   6
   3  -4   3 2727.31 256.152   3
  -4  -3   3 2601.21 256.625   5
   4   3   3 2683.10 254.697   5
  -3   4   3 2895.25 255.903   2
  -4  -3   3 2836.56 255.053   6
   4   3   3 2659.47 256.377   1
  -3   4   3 2799.80 255.556   3
   4   3   3 2700.59 255.527   7
  -4  -3   3 2654.31 256.388   4
  -4  -3   3 2684.05 255.479   2
  -4  -3   3 3096.53 256.879   7
   3  -4   4 12.5242 13.0530   5
  -4  -3   4-7.41340 9.07932   8
   4   3   4-4.80765 12.3478   1
   4   3   4 12.6297 10.4192   7
  -4  -3   4-2.45075 13.0653   5
  -3   4   4-1.21916 12.5248   1
  -3   4   4-6.95668 9.62165   3
  -4  -3   4 15.0069 11.6929   4
   4   3   4 0.31527 4.84431   4
   3  -4   4 17.6151 6.90212   4
  -3   4   4 11.5925 14.4284   8
  -4  -3   4 17.4637 14.2873   7
  -4  -3   4 3.06916 7.80013   6
   4   3   4 3.70400 6.65937   5
  -3   4   4 7.83572 10.2187   2
   3  -4   4 14.9984 11.9423   3
   3  -4   4 4.83498 5.65273   8
  -3   4   4 1.20700 13.1911   6
  -4  -3   5 12273.7 1180.26   4
   3  -4   5 13021.0 1180.77   5
   3  -4   5 12894.3 1178.34   4
  -4  -3   5 13975.7 1181.31   7
  -4  -3   5 12087.0 1180.89   5
  -4  -3   5 12303.7 1179.08   6
   4   3   5 13039.1 1178.62   5
  -3   4   5 12945.7 1179.96   2
  -3   4   5 13532.4 1180.29   3
  -3   4   5 12289.6 1180.93   1
   3  -4   5 12456.2 1180.89   7
   4   3   5 11947.4 1177.82   4
   3  -4   5 11833.7 1180.42   3
   3  -4   5 12808.0 1178.22   8
   4   3   5 13014.6 1179.70   7
  -3   4   5 14193.6 1179.05   7
  -4  -3   5 12581.4 1179.49   8
  -3   4   5 12748.6 1181.12   6
   4   3   5 12989.1 1181.09   1
   4   3   6 311.456 32.9636   1
   4   3   6 174.053 26.3099   5
  -3   4   6 370.985 30.8511   2
   4   3   6 256.504 33.5146   3
  -3   4   6 202.583 31.8590   6
   3  -4   6 209.540 31.5220   5
   4   3   6 326.767 33.0920   2
  -4  -3   6 336.465 34.0835   7
  -3   4   6 218.521 27.4120   7
  -3   4   6 302.993 30.9066   3
   3  -4   6 225.705 24.8993   4
   3  -4   6 293.006 32.2973   3
  -3   4   6 341.442 33.6611   1
  -4  -3   6 221.959 27.8043   8
   4   3   6 207.013 27.9843   7
   3  -4   6 219.516 32.3005   7
  -4  -3   6 169.775 31.5052   5
  -4  -3   6 237.144 30.2074   4
   3  -4   7 962.569 93.8519   3
   4   3   7 1035.16 95.1675   3
  -3   4   7 942.324 92.9539   3
   3  -4   7 897.215 94.0779   7
   4   3   7 926.881 94.5688   1
   4   3   7 924.645 90.3980   5
   4   3   7 958.710 94.5476   2
  -4  -3   7 999.571 94.4334   7
   3  -4   7 993.597 94.0101   5
   3  -4   7 887.319 88.6513   4
  -4  -3   7 980.033 92.2145   4
   4   3   7 935.182 91.8441   7
  -3   4   7 921.727 92.2350   2
  -4  -3   7 999.997 94.5894   5
  -3   4   7 987.663 94.2393   1
  -3   4   7 1002.45 91.4342   7
  -4  -3   7 856.332 90.4938   8
   3  -4   8 169.614 35.5971   5
   4   3   8 204.501 29.9925   5
   3  -4   8 252.279 38.4870   7
  -4  -3   8 198.491 31.6913   4
   4   3   8 341.431 38.0894   2
  -4  -3   8 184.305 35.5305   5
   4   3   8 183.160 32.1570   7
  -4  -3   8 237.765 37.1354   7
  -3   4   8 211.597 30.4834   7
  -3   4   8 314.706 35.9141   3
  -3   4   8 333.462 35.3991   2
   4   3   8 248.964 38.2198   3
  -3   4   8 351.023 38.2485   1
  -4  -3   9 828.761 77.8307   7
  -3   4   9 662.674 73.2674   2
  -3   4   9 745.381 72.4038   7
   4   3   9 709.681 78.2847   3
   4   3   9 601.011 74.9675   2
  -3   4   9 788.287 75.7368   3
  -4  -3   9 662.292 75.3873   5
  -3   4   9 633.287 75.5621   1
   4   3   9 616.590 73.3246   7
   3  -4   9 725.438 77.1329   7
  -4  -3   9 659.037 72.3528   4
   3  -4   9 717.905 76.0796   5
  -4  -3  10 91.3372 31.9738   7
   4   3  10 86.6685 27.1970   7
  -4  -3  10 51.9931 21.1415   4
  -4  -3  10 49.7480 28.9922   5
   3  -4  10 66.2988 29.8676   7
  -3   4  10 51.2734 24.2547   7
   4   3  10 61.0770 33.1971   3
   4   3  10 69.1551 28.3970   2
   3  -4  10 17.8894 28.2389   5
  -3   4  10 41.5174 26.7843   3
  -3   4  10 96.2385 29.4909   1
  -3   4  10 160.442 27.5582   2
   4   3  11-6.05492 27.8050   2
  -4  -3  11 16.1145 25.9643   5
  -4  -3  11 45.1136 29.4740   7
   4   3  11 9.67052 24.7124   7
  -3   4  11-9.96939 23.6586   2
   4   3  11 3.20602 29.1082   3
  -3   4  11 9.13548 26.9974   1
   3  -4  11 15.2755 29.8357   7
  -3   4  11-29.8015 27.5013   3
   3  -4  11 8.37779 28.2815   5
  -4  -3  12-21.6672 31.6390   7
   3  -4  12-16.6861 33.8758   3
   3  -4  12-3.01499 29.6658   5
   4   3  12-9.83506 28.9765   2
  -3   4  12 19.0021 25.4930   2
   4   3  12-8.03373 26.9303   7
   3  -4  12 10.0933 32.1898   7
   4   3  12-3.48769 31.7578   3
  -4  -3  12 34.8830 26.9255   5
  -3   4  12 32.8828 28.7509   3
  -4  -3  13 12.3858 30.0131   5
  -3   4  13-35.8112 31.7954   3
   4   3  13-17.6982 28.8929   2
  -4  -3  13 26.6240 32.2568   7
   3  -4  13-69.4412 37.4439   3
  -3   4  13 32.2120 27.7252   2
   3  -4  13 32.8852 33.6551   7
   4   3  13-18.8907 33.7006   3
  -3   4  14-38.7229 33.6116   3
   4   3  14 38.0725 34.5858   2
  -4  -3  14 14.1771 36.9039   7
   3  -4  14 7.92762 39.7813   7
   4   3  14 48.3500 35.7390   3
   3  -4  14 23.7223 37.9430   3
  -3   4  15 56.5282 34.5112   3
   4   3  15-34.4307 39.0737   3
  -4  -3  15-52.1468 42.3686   7
   3  -4  15 38.1571 41.9190   7
   4  -4 -15-24.7359 35.1092   6
  -4   4 -15-9.47232 42.6212   2
   4   4 -15 33.3655 34.6455   1
   4  -4 -15 4.09740 36.6543   1
  -4  -4 -15 41.3413 35.8613   6
   4   4 -15-59.5424 40.1524   3
  -4   4 -14 35.9153 39.5558   2
   4   4 -14 36.6269 36.1881   3
   4  -4 -14-61.5256 36.7890   1
   4   4 -14-19.2958 35.9417   1
   4  -4 -14 16.9817 31.5441   6
  -4  -4 -14-17.6638 36.7650   6
  -4   4 -14 14.0071 39.1877   1
  -4   4 -13 41.9621 36.6281   2
   4   4 -13 30.4687 29.9204   2
  -4  -4 -13-42.2329 29.2357   8
   4   4 -13 28.1106 30.3812   1
   4  -4 -13 50.1558 32.4303   1
   4   4 -13-19.2268 36.0098   3
   4  -4 -13-9.72249 30.1826   6
  -4  -4 -13-13.1897 31.1310   6
   4  -4 -13-28.9791 27.8693   8
  -4   4 -13 29.7260 34.2821   1
   4  -4 -12-5.59795 26.4308   8
  -4   4 -12 6.91775 21.4827   6
   4   4 -12 6.34465 28.3842   1
   4  -4 -12 42.6121 30.4655   6
  -4   4 -12-7.72196 32.9562   2
  -4  -4 -12-3.05305 28.2814   6
  -4  -4 -12 9.38344 25.1111   8
   4   4 -12 3.59329 33.2840   3
   4   4 -12 6.30139 28.2750   2
  -4   4 -12 3.81085 33.1641   1
  -4  -4 -11-2.19895 21.7988   8
  -4   4 -11-27.3113 28.4604   1
   4   4 -11 14.4811 27.3463   2
  -4  -4 -11 16.8369 27.1987   6
   4  -4 -11-2.68560 24.7372   8
   4   4 -11 25.3962 24.6347   1
   4  -4 -11 16.8741 25.3123   6
  -4   4 -11-21.2720 31.2400   2
  -4   4 -11 29.2860 21.6769   6
   4   4 -11-19.8751 28.5515   3
  -4   4 -10-15.0602 26.7954   1
  -4   4 -10 19.4735 32.4128   2
   4  -4 -10 19.3135 19.5017   4
   4   4 -10 32.8481 20.8482   6
   4   4 -10 34.9997 23.8684   1
  -4  -4 -10-4.07970 22.1174   8
   4   4 -10-21.0265 30.7119   3
  -4  -4 -10 21.2413 29.2690   1
  -4  -4 -10 12.7487 26.1923   6
   4  -4 -10 13.0128 25.6818   6
   4   4 -10-7.85197 25.9541   2
   4  -4 -10-15.3137 25.9191   8
  -4   4 -10-13.1329 20.0526   6
   4  -4 -10 35.8848 22.0481   5
   4  -4  -9 359.190 55.4863   8
   4   4  -9 624.360 57.1421   2
   4   4  -9 704.005 56.5270   1
  -4   4  -9 402.644 51.5662   6
   4  -4  -9 397.609 51.6810   5
   4  -4  -9 440.778 57.2732   6
  -4  -4  -9 465.164 56.9417   6
   4   4  -9 392.767 50.2154   6
   4   4  -9 387.049 48.8725   8
  -4   4  -9 629.379 60.6611   1
  -4  -4  -9 431.483 53.4235   8
   4  -4  -9 388.414 51.1413   4
  -4   4  -9 565.095 61.3956   2
   4   4  -9 465.808 59.4987   3
   4  -4  -8 1144.20 110.790   8
  -4   4  -8 1053.71 104.878   8
  -4   4  -8 1168.84 108.031   6
   4   4  -8 1091.02 109.039   1
   4   4  -8 969.147 106.142   8
   4  -4  -8 1084.81 107.748   4
  -4   4  -8 1185.15 113.571   2
   4   4  -8 1181.88 110.513   2
  -4   4  -8 1038.05 110.777   1
  -4  -4  -8 1216.79 109.060   8
  -4  -4  -8 1046.69 110.279   6
   4  -4  -8 1149.00 108.111   5
   4   4  -8 1118.08 107.260   6
   4   4  -8 1251.63 112.113   3
   4   4  -7 31.8061 13.8878   6
   4   4  -7 17.3371 16.1104   1
   4  -4  -7 41.7662 21.4299   8
  -4   4  -7 21.1313 14.5392   6
   4   4  -7 29.1208 18.1673   2
   4   4  -7 38.0164 20.8344   3
   4  -4  -7 15.7899 15.9056   5
   4  -4  -7 5.67127 14.5416   4
  -4   4  -7 21.9155 9.33604   8
  -4  -4  -7 3.06521 17.9781   8
  -4  -4  -7 8.43095 7.71186   4
  -4  -4  -7-1.83390 19.9317   6
  -4   4  -6 2971.86 271.162   8
   4   4  -6 2834.00 273.318   1
   4  -4  -6 2900.73 272.801   5
  -4  -4  -6 3018.64 273.948   8
   4   4  -6 2883.60 274.594   3
  -4   4  -6 2879.76 270.538   4
  -4   4  -6 3070.71 273.088   6
   4   4  -6 3013.17 273.806   2
  -4  -4  -6 2910.88 270.748   5
  -4  -4  -6 2870.83 270.825   4
   4   4  -6 3028.61 272.341   6
   4  -4  -6 2830.47 273.260   4
  -4  -4  -6 2724.76 274.318   6
  -4   4  -5 607.174 58.6196   4
  -4  -4  -5 630.683 59.1161   4
  -4   4  -5 544.135 59.0225   8
   4   4  -5 891.298 63.3047   2
  -4   4  -5 597.559 61.5778   6
   4   4  -5 970.094 62.8645   1
  -4  -4  -5 593.891 58.5535   5
  -4  -4  -5 615.591 62.7924   8
   4  -4  -5 563.932 61.9181   4
   4   4  -5 647.308 63.4869   3
   4   4  -5 557.904 59.2227   6
   4  -4  -5 609.576 60.6080   5
   4   4  -4 2395.16 214.529   3
   4   4  -4 2315.31 212.206   6
   4   4  -4 2264.64 213.463   1
   4  -4  -4 2252.26 214.198   4
  -4  -4  -4 2350.48 212.038   5
  -4   4  -4 2382.91 212.209   4
  -4  -4  -4 2285.94 212.405   4
  -4  -4  -4 2435.35 214.558   8
  -4   4  -4 2320.40 215.344   2
   4   4  -4 2350.49 213.776   2
  -4   4  -4 2273.78 212.361   8
   4  -4  -4 2032.60 212.535   7
  -4   4  -4 2407.74 213.906   6
  -4  -4  -4 2134.01 214.634   6
   4  -4  -4 2204.25 213.163   5
   4   4  -4 2173.88 212.875   8
   4  -4  -3 722.978 47.5232   2
   4  -4  -3 457.232 47.0884   5
  -4   4  -3 404.803 46.1229   8
   4   4  -3 438.571 45.7898   6
   4   4  -3 492.677 48.1680   3
   4  -4  -3 532.495 46.6396   3
  -4   4  -3 420.064 47.5187   6
  -4   4  -3 676.413 50.3132   2
   4   4  -3 712.784 48.0926   2
   4  -4  -3 355.351 45.8298   7
  -4  -4  -3 522.296 46.7674   4
   4   4  -3 742.331 47.7719   1
  -4   4  -3 470.298 46.1705   4
   4  -4  -3 462.666 48.3696   4
  -4  -4  -3 409.198 46.9884   7
   4  -4  -3 448.862 46.3085   7
  -4   4  -3 785.201 51.2912   1
  -4  -4  -3 468.240 48.5263   6
   4   4  -3 446.962 46.8314   8
  -4  -4  -3 477.403 45.9018   5
  -4   4  -2 72357.8 6644.67   1
  -4   4  -2 72306.7 6644.64   2
  -4   4  -2 71208.1 6644.02   6
  -4  -4  -2 73463.1 6644.33   6
  -4  -4  -2 73632.0 6643.98   1
   4  -4  -2 70951.4 6643.13   2
  -4  -4  -2 70572.8 6643.52   7
   4   4  -2 71073.4 6643.91   3
  -4  -4  -2 71010.9 6643.57   4
  -4   4  -2 72891.5 6643.38   4
   4  -4  -2 72065.9 6643.04   7
   4   4  -2 71364.4 6642.94   6
   4   4  -2 69454.6 6643.18   1
  -4  -4  -2 71709.3 6643.19   5
   4   4  -2 73331.6 6643.60   8
   4  -4  -2 72971.7 6643.61   5
  -4   4  -2 70594.8 6643.29   8
   4   4  -2 71339.6 6643.35   2
  -4   4  -2 72393.1 6643.98   3
   4  -4  -2 74145.5 6642.94   3
   4  -4  -1 1278.52 141.516   8
  -4  -4  -1 1247.93 140.945   7
   4   4  -1 1908.36 141.076   2
   4   4  -1 1278.61 140.814   8
   4  -4  -1 1425.58 139.867   3
  -4  -4  -1 1318.62 141.138   6
  -4  -4  -1 2037.33 141.938   2
  -4   4  -1 1143.14 140.738   8
   4   4  -1 1500.12 141.313   3
  -4  -4  -1 1388.19 141.248   4
  -4   4  -1 1285.75 140.875   4
  -4   4  -1 1290.20 140.835   7
  -4  -4  -1 2256.42 141.406   1
  -4   4  -1 1261.59 141.130   6
   4  -4  -1 1372.44 141.660   4
   4   4  -1 2101.82 140.304   1
   4  -4  -1 1242.04 140.281   7
  -4  -4  -1 1280.37 141.333   8
   4  -4  -1 1949.35 140.832   2
   4  -4  -1 1275.06 140.855   5
  -4   4  -1 1727.86 140.944   3
   4   4  -1 1301.19 141.660   5
  -4   4  -1 2161.62 142.406   1
   4   4  -1 1261.69 140.264   6
  -4   4  -1 1441.71 140.845   3
  -4   4  -1 1930.99 142.058   2
   4  -4  -1 2156.91 141.632   1
  -4  -4   0 4416.57 391.803   5
   4   4   0 4399.45 391.343   6
  -4  -4   0 4827.63 392.287   4
   4  -4   0 3940.05 391.543   1
  -4   4   0 4250.61 390.775   3
   4   4   0 4561.66 391.698   8
  -4   4   0 4317.50 391.978   8
  -4  -4   0 4356.27 391.355   6
  -4   4   0 4380.45 391.227   7
  -4  -4   0 4348.38 391.325   2
  -4   4   0 4404.66 391.577   5
   4   4   0 4192.85 391.654   2
   4   4   0 3712.93 392.577   3
   4   4   0 4192.56 390.992   1
   4   4   0 4580.02 391.964   4
  -4   4   0 4345.99 391.899   4
   4   4   0 4357.28 391.946   7
  -4   4   0 3111.90 390.485   3
  -4  -4   0 4615.09 390.832   1
  -4   4   0 4290.54 391.768   6
   4   4   0 4434.59 391.890   5
   4  -4   0 4540.95 391.920   4
   4  -4   0 4422.43 391.841   8
  -4   4   0 4158.39 391.554   1
   4  -4   0 4308.10 391.620   5
  -4  -4   0 4359.35 391.780   8
  -4  -4   0 4486.58 391.767   3
   4  -4   0 4304.53 391.765   6
   4  -4   0 4273.59 391.547   2
   4  -4   0 4382.01 391.339   7
  -4   4   0 4163.46 391.245   2
   4  -4   1 1278.56 139.786   8
  -4   4   1 1249.80 140.652   8
   4   4   1 1280.77 140.112   7
  -4  -4   1 1989.71 140.078   2
   4   4   1 2087.11 141.562   2
  -4   4   1 1183.92 140.356   6
  -4  -4   1 1237.39 139.429   6
   4   4   1 1387.42 140.069   4
  -4   4   1 1289.94 139.484   7
   4  -4   1 1312.07 140.182   6
  -4  -4   1 1270.31 140.134   8
  -4   4   1 1332.16 139.996   5
  -4   4   1 1975.72 139.972   2
   4  -4   1 1396.34 140.034   4
   4  -4   1 1855.01 141.129   2
  -4  -4   1 1418.16 140.194   3
   4   4   1 1444.32 139.999   5
   4   4   1 1170.76 140.122   6
  -4  -4   1 2208.48 139.674   1
   4   4   1 2285.22 140.886   1
  -4   4   1 2364.31 141.186   1
   4   4   1 1322.55 139.847   5
  -4  -4   1 1339.20 140.737   5
   4  -4   1 1252.65 140.167   7
   4   4   2 72770.4 6659.04   4
   4  -4   2 73707.9 6659.53   6
  -4   4   2 72314.2 6658.64   3
   4  -4   2 72512.2 6659.88   7
   4   4   2 73884.1 6659.23   7
   4   4   2 71856.9 6660.15   2
   4  -4   2 72755.7 6658.80   8
  -4  -4   2 72601.7 6659.21   2
   4   4   2 71452.8 6659.79   1
  -4  -4   2 73697.0 6660.19   4
   4  -4   2 70943.1 6659.47   3
  -4   4   2 70813.2 6659.14   2
   4  -4   2 74242.7 6659.03   4
  -4   4   2 69909.6 6659.71   1
  -4   4   2 72490.8 6659.33   5
  -4  -4   2 71732.1 6659.36   8
  -4  -4   2 68870.0 6658.38   6
  -4  -4   2 72745.8 6658.71   1
   4   4   2 72263.7 6658.60   5
  -4  -4   3 470.679 48.3470   6
  -4  -4   3 803.312 49.8592   1
   4   4   3 469.108 49.1792   7
  -4  -4   3 701.412 50.4739   2
   4   4   3 380.752 47.8434   5
  -4  -4   3 451.297 49.3710   8
  -4   4   3 438.489 49.7979   5
   4   4   3 495.398 48.7847   4
  -4   4   3 651.745 49.5344   3
  -4  -4   3 489.908 50.7877   4
   4   4   3 671.474 52.1744   2
   4  -4   3 426.975 48.1608   8
  -4   4   3 813.550 52.4451   1
   4  -4   3 440.296 48.7265   4
  -4   4   3 756.551 50.4288   2
   4   4   3 820.079 52.5753   1
   4  -4   3 456.699 50.7863   7
   4  -4   3 620.739 50.9023   3
  -4   4   3 495.333 51.4850   6
   4  -4   3 429.165 50.4909   5
  -4  -4   4 2649.99 202.349   7
  -4   4   4 2252.46 200.090   2
  -4   4   4 2262.09 201.562   6
   4   4   4 2395.23 198.906   4
   4   4   4 2360.66 201.722   1
   4  -4   4 2398.91 198.950   4
   4  -4   4 2122.50 200.796   3
  -4   4   4 2253.83 201.505   8
   4   4   4 2362.45 199.995   7
  -4  -4   4 2356.17 200.034   8
  -4   4   4 2406.91 200.217   3
  -4  -4   4 2309.50 201.082   4
  -4  -4   4 2335.70 199.195   6
   4  -4   4 2432.16 201.597   5
  -4  -4   4 2309.27 201.997   5
   4   4   4 1234.84 198.142   5
  -4   4   4 2419.66 201.755   1
   4  -4   4 2416.81 198.882   8
   4  -4   5 495.788 59.3615   4
   4   4   5 561.858 59.8147   4
  -4   4   5 613.989 64.0546   8
   4  -4   5 590.910 60.0504   8
  -4   4   5 621.078 64.9538   6
  -4  -4   5 578.895 65.0001   7
  -4  -4   5 649.951 63.5336   4
  -4   4   5 1012.83 64.0293   2
   4  -4   5 794.283 65.0396   3
   4   4   5 1019.68 67.1238   1
   4  -4   5 609.951 64.4561   5
  -4   4   5 750.043 63.0200   3
   4   4   5 639.776 62.2263   7
  -4  -4   5 571.992 60.8073   6
   4   4   5 775.917 65.5113   3
  -4  -4   5 516.043 64.6605   5
   4   4   5 655.703 59.9489   5
  -4   4   5 1031.68 66.7032   1
  -4  -4   5 552.601 61.3586   8
   4   4   6 2848.66 266.691   7
   4  -4   6 2874.00 268.600   7
   4  -4   6 2879.36 265.162   8
  -4   4   6 2896.97 268.515   6
   4   4   6 2743.11 268.560   2
  -4  -4   6 2838.77 265.948   8
  -4   4   6 2860.47 266.951   2
   4   4   6 2707.67 268.633   1
  -4  -4   6 3134.68 269.128   5
  -4   4   6 2994.02 266.006   7
   4   4   6 2887.32 268.732   3
   4  -4   6 3036.50 268.339   5
  -4   4   6 2824.14 267.311   3
   4  -4   6 2652.06 267.948   3
   4   4   6 2683.77 264.558   4
  -4   4   6 2698.83 268.229   1
  -4  -4   6 3270.39 269.312   7
   4   4   6 2935.41 265.224   5
  -4  -4   6 2660.74 267.249   4
   4   4   7 28.8020 11.9154   5
   4  -4   7-1.78010 18.5786   5
  -4  -4   7 51.5181 21.8214   5
   4  -4   7 46.8528 7.57872   4
  -4   4   7 25.0809 17.3328   3
  -4  -4   7 19.6509 12.4769   8
   4   4   7 30.7718 21.0516   1
  -4   4   7 73.3486 20.6727   1
   4   4   7 18.3022 19.9498   3
  -4   4   7 48.6720 15.7906   2
   4  -4   7 45.4384 21.4550   7
   4   4   7 16.1889 20.4868   2
  -4  -4   7 38.8788 22.4889   7
   4   4   7 14.9415 14.3479   7
  -4   4   7 30.3298 15.1469   7
   4  -4   7 52.4415 20.4462   3
  -4   4   7 40.7233 21.1536   6
  -4  -4   7 7.65909 16.0998   4
  -4  -4   8 1209.94 112.376   5
   4   4   8 1066.51 112.061   1
  -4  -4   8 1058.33 109.170   4
  -4  -4   8 1186.17 112.507   7
  -4   4   8 1156.99 109.560   2
   4   4   8 992.713 111.714   3
  -4   4   8 1063.01 111.221   1
   4  -4   8 1231.59 111.566   5
   4   4   8 1110.50 108.992   7
  -4   4   8 1121.21 108.329   7
   4   4   8 1043.11 111.880   2
   4  -4   8 1229.21 112.686   7
  -4   4   8 1155.06 110.230   3
   4  -4   8 1054.66 111.814   3
   4   4   8 1084.32 106.662   5
   4   4   9 540.918 62.0042   3
   4   4   9 675.549 62.4346   2
  -4  -4   9 401.483 60.1923   7
   4  -4   9 391.719 58.7807   7
  -4   4   9 574.011 59.9168   1
   4  -4   9 458.227 57.9172   5
  -4  -4   9 367.755 54.4875   4
  -4  -4   9 404.447 59.5867   5
   4   4   9 649.805 63.0936   1
   4   4   9 402.729 53.9525   7
  -4   4   9 483.020 57.6538   3
  -4   4   9 695.104 56.6179   2
  -4   4   9 416.266 53.4565   7
   4  -4   9 469.865 59.5277   3
   4  -4  10 42.1621 29.1928   7
   4   4  10 2.96576 28.0814   3
  -4   4  10-13.0607 21.2125   2
   4   4  10 27.0203 23.9114   7
  -4  -4  10 10.8792 29.1740   7
  -4   4  10-10.8906 26.0548   1
   4   4  10 25.2150 26.3864   2
  -4   4  10-11.7702 23.2832   3
  -4  -4  10 36.8916 26.3153   5
  -4  -4  10 25.2531 20.5355   4
  -4   4  10-3.45292 21.7851   7
   4  -4  10-25.6255 26.4972   5
  -4  -4  11 14.2368 26.4446   5
   4   4  11-19.4046 30.3683   3
  -4   4  11-7.89260 25.3009   3
   4  -4  11-6.18954 29.3741   7
   4  -4  11-8.38876 27.8496   5
   4   4  11 3.08757 27.5378   2
  -4   4  11 7.17300 21.6440   2
  -4  -4  11 49.8315 29.3350   7
   4   4  11-4.63763 22.1260   7
  -4   4  11-6.02631 25.8004   1
  -4  -4  12 86.7342 34.8367   7
   4   4  12 17.6119 31.7311   3
   4  -4  12-3.02320 30.7200   5
   4   4  12 33.2617 30.7530   2
  -4   4  12 5.21883 24.6774   2
  -4  -4  12-6.08037 28.9685   5
   4  -4  12-3.41950 31.9666   7
  -4   4  12-8.74239 28.7071   3
  -4   4  12 56.5994 29.6398   1
  -4  -4  13 24.1355 33.6734   7
  -4   4  13-28.5010 31.7714   3
  -4  -4  13 9.75683 31.5228   5
   4   4  13-11.4325 37.5891   3
   4   4  13-10.7757 33.8229   2
   4  -4  14 35.8535 36.3762   7
  -4  -4  14-44.0047 39.3258   7
   4   4  14 24.4590 36.7930   3
  -4   4  14-3.42630 31.8212   3
   4  -4  14-8.03140 39.6062   3
  -4  -4  15-15.4095 38.5000   7
   4   4  15-4.09104 34.9584   2
   4  -4  15-21.4061 40.7803   7
  -4   4  15-33.1452 33.7701   3
   5  -4 -15 8.00081 35.0310   1
   4   5 -15 33.9491 38.8633   1
   4   5 -15-8.54595 40.5592   3
  -4  -5 -15 73.3870 37.5304   6
   5  -4 -15-52.4989 35.5276   6
   5  -4 -14-13.4977 32.9725   6
  -5   4 -14 4.78058 39.3128   1
  -4  -5 -14 10.9431 35.3701   6
   5  -4 -14-7.51253 34.2203   1
   4   5 -14-31.3919 35.3314   1
   4   5 -14-12.2979 35.3479   3
  -5   4 -14-41.6238 41.8811   2
  -4  -5 -13-20.4762 30.7111   6
   4   5 -13 34.3314 31.0774   2
  -5   4 -13-56.1320 35.8676   2
  -4  -5 -13 18.4955 27.4356   8
   5  -4 -13-14.0079 28.4779   1
   4   5 -13 15.5261 34.8267   3
   5  -4 -13 29.2013 29.2932   8
   5  -4 -13-3.21800 31.6604   6
  -5   4 -13-47.5031 39.2056   1
   4   5 -13 28.7031 31.5142   1
   4   5 -12-3.25721 28.7927   1
  -4  -5 -12-15.8450 29.2733   6
   5  -4 -12 8.52853 26.5550   8
  -5   4 -12 19.4848 31.9239   1
   4   5 -12 32.1089 29.2407   2
  -4  -5 -12-22.5224 24.9304   8
  -5   4 -12 14.4779 24.4421   6
   5  -4 -12-5.98267 28.3225   6
  -5   4 -12 47.6320 34.7610   2
   4   5 -12 14.5176 32.9550   3
  -5   4 -11 41.7193 29.6724   1
   5  -4 -11 16.4510 24.8213   8
  -4  -5 -11 44.3148 24.2200   8
  -4  -5 -11-34.3712 31.3865   1
   4   5 -11 10.0163 29.1447   3
   5  -4 -11-8.38770 26.5389   6
  -5   4 -11-8.73006 20.4959   6
   4   5 -11-5.90713 27.2028   2
   4   5 -11 20.2534 25.6511   1
  -4  -5 -11-2.90592 27.9474   6
   5  -4 -11-22.4203 20.5455   4
  -5   4 -11 3.64388 30.0597   2
  -5   4 -10 21.7174 28.8191   1
  -4  -5 -10 39.7375 27.4748   6
   4   5 -10 51.4117 30.9891   3
  -4  -5 -10 10.8437 23.6984   8
   5  -4 -10 57.7644 20.0716   4
   5  -4 -10 31.2034 21.2040   5
  -5   4 -10 3.94418 20.8666   6
   4   5 -10 34.6434 26.7609   2
   5  -4 -10 7.80450 24.2625   8
   4   5 -10 12.8140 23.5731   1
  -5   4 -10-33.3465 31.2203   2
   5  -4 -10 41.3780 25.7276   6
   4   5  -9 37.8602 26.7074   1
   5  -4  -9 51.5700 28.8364   6
   5  -4  -9 3.55870 22.8743   5
  -4  -5  -9 37.8732 26.7523   8
   5  -4  -9 63.3990 30.8300   8
   4   5  -9 56.3734 19.8551   6
   4   5  -9 21.1810 17.9253   8
  -4  -5  -9 19.1640 27.9301   6
   4   5  -9 42.5143 28.1185   2
   5  -4  -9 12.6564 23.0009   4
  -5   4  -9 5.98621 32.2799   2
  -5   4  -9 12.4609 21.4100   6
   4   5  -9 40.3660 31.5660   3
   5  -4  -8 20.7400 21.1279   5
   4   5  -8 34.5532 17.1761   6
   4   5  -8 77.6219 27.6016   3
   5  -4  -8 55.5286 20.8165   4
  -5   4  -8 46.2278 14.0428   8
  -4  -5  -8 60.3919 27.1123   6
  -4  -5  -8 21.7926 23.7310   8
   4   5  -8 59.5146 24.7965   2
   4   5  -8 55.6075 22.1741   1
  -5   4  -8 62.6563 21.8716   6
   5  -4  -8 62.7696 25.8789   8
   5  -4  -7 280.599 33.2893   5
  -4  -5  -7 276.819 37.1749   6
   4   5  -7 287.853 36.9698   3
  -5   4  -7 285.526 29.2674   8
   4   5  -7 314.657 35.8510   2
   4   5  -7 275.940 34.3213   1
  -4  -5  -7 256.757 28.7717   4
  -5   4  -7 279.601 33.4813   6
   5  -4  -7 262.069 34.0762   4
   4   5  -7 267.256 30.5233   6
  -4  -5  -7 303.920 35.1219   8
   4   5  -6 391.520 44.5152   6
   4   5  -6 675.661 49.1908   1
  -5   4  -6 428.646 46.7798   6
  -4  -5  -6 435.098 48.5126   8
  -4  -5  -6 408.109 42.4195   5
  -5   4  -6 421.219 42.1937   4
   5  -4  -6 427.735 47.4180   4
   5  -4  -6 449.330 46.4044   5
   4   5  -6 600.878 48.5907   2
  -5   4  -6 399.335 43.7561   8
  -4  -5  -6 461.122 43.8226   4
  -5   4  -6 625.910 53.2080   2
   4   5  -6 451.252 49.4464   3
  -5   4  -6 659.888 52.0059   1
   4   5  -5 2095.50 193.807   3
  -4  -5  -5 2062.25 193.487   8
  -5   4  -5 2070.62 192.921   6
   4   5  -5 2084.34 192.903   2
   5  -4  -5 2202.09 192.585   5
   5  -4  -5 1963.67 193.183   4
   4   5  -5 2128.36 191.043   6
  -4  -5  -5 1927.05 190.837   4
   4   5  -5 1945.31 192.535   1
  -4  -5  -5 2049.17 189.986   5
   4   5  -5 2151.71 190.539   6
  -5   4  -5 2027.51 190.956   8
  -5   4  -5 2095.08 194.971   2
  -5   4  -5 1997.99 190.094   4
  -5   4  -5 1901.95 194.165   1
   5  -4  -4 29.2408 8.34565   3
   5  -4  -4 9.09831 7.90835   7
  -4  -5  -4 10.0885 13.4670   6
  -5   4  -4 13.2616 6.20987   4
  -5   4  -4 28.6952 15.5168   2
   4   5  -4 18.0150 5.45047   6
  -5   4  -4 13.6043 7.39446   8
   4   5  -4 20.8680 7.69327   8
   4   5  -4 31.4489 10.5164   1
   5  -4  -4 9.44650 10.2898   5
  -4  -5  -4 28.6697 8.45269   4
  -5   4  -4 13.7163 11.6105   6
  -4  -5  -4 15.0148 14.0032   8
  -5   4  -4 32.9096 15.3477   1
   4   5  -4 17.3352 12.7939   3
   5  -4  -4 34.2313 13.7351   4
   4   5  -4 20.6594 10.8813   2
  -4  -5  -4 19.1858 4.88494   5
   4   5  -3 4840.42 428.103   1
  -4  -5  -3 4561.20 427.012   5
  -5   4  -3 6988.35 431.308   2
  -4  -5  -3 4683.45 429.175   6
   4   5  -3 4895.20 427.781   8
   5  -4  -3 4611.48 427.597   7
  -5   4  -3 4614.78 427.705   8
   5  -4  -3 4617.81 427.289   3
   4   5  -3 4466.16 426.810   6
  -4  -5  -3 4637.43 427.839   4
   4   5  -3 4611.16 428.161   2
  -5   4  -3 4642.73 428.840   6
   5  -4  -3 4696.61 428.281   5
   5  -4  -3 3880.61 427.050   7
  -5   4  -3 4871.39 429.794   1
  -5   4  -3 4521.51 427.402   4
  -4  -5  -3 4644.18 427.759   7
   5  -4  -3 4659.66 429.192   4
   5  -4  -3 4806.66 427.516   2
  -5   4  -2 744.026 85.4474   8
  -4  -5  -2 760.815 86.6949   6
   4   5  -2 755.984 85.4235   8
  -5   4  -2 1101.16 87.8641   2
   4   5  -2 767.066 84.4930   6
  -5   4  -2 1342.43 88.5408   1
   4   5  -2 1367.23 85.8475   1
   5  -4  -2 805.034 85.2749   7
   5  -4  -2 795.759 85.9398   5
  -5   4  -2 1070.39 86.3871   3
   4   5  -2 1233.24 86.1749   2
  -4  -5  -2 841.014 86.8038   8
   5  -4  -2 950.995 84.7426   3
  -4  -5  -2 729.493 85.4786   7
   5  -4  -2 1229.87 85.2858   2
  -5   4  -2 842.080 85.5603   4
  -4  -5  -2 824.400 85.8270   4
  -5   4  -2 798.206 86.4343   6
   4   5  -2 880.427 86.5390   3
  -4  -5  -1 55775.3 5146.94   4
  -5   4  -1 54337.0 5147.01   6
  -5   4  -1 56368.6 5146.97   2
   4   5  -1 56778.0 5145.86   6
   4   5  -1 54670.3 5146.39   2
  -4  -5  -1 56174.3 5146.76   6
   4   5  -1 55458.6 5145.81   1
   4   5  -1 57232.5 5146.89   3
  -4  -5  -1 56185.9 5146.28   1
  -5   4  -1 55146.7 5146.74   8
  -5   4  -1 55620.6 5146.20   3
   5  -4  -1 54119.9 5146.64   5
  -5   4  -1 54879.5 5146.94   1
   4   5  -1 56829.7 5146.50   8
  -4  -5  -1 56572.8 5146.99   8
   5  -4  -1 56162.8 5146.16   7
   5  -4  -1 56527.8 5147.32   4
  -4  -5  -1 53947.0 5146.53   7
   5  -4  -1 55166.7 5146.08   2
  -5   4  -1 55275.3 5146.69   4
   5  -4   0 251.020 21.5776   2
   4   5   0 272.688 20.9843   1
  -4  -5   0 295.903 21.7098   2
   5  -4   0 195.196 21.7856   8
  -5   4   0 219.234 19.8061   3
  -5   4   0 170.099 20.8511   7
  -4  -5   0 162.647 21.3378   8
  -4  -5   0 303.341 20.5722   1
  -4  -5   0 177.389 22.4828   4
   5  -4   0 169.603 20.6493   7
  -5   4   0 158.203 21.6880   8
  -4  -5   0 166.411 20.4357   6
   4   5   0 152.449 20.5395   6
   5  -4   0 162.921 21.5340   4
   4   5   0 166.073 21.1579   8
   4   5   0 172.473 21.8640   7
  -5   4   0 264.161 22.0684   1
  -5   4   0 153.077 21.4882   6
   4   5   0 183.846 21.9255   5
   4   5   0 267.185 22.3101   2
  -4  -5   0 187.978 21.4622   5
   5  -4   0 164.318 21.1781   5
  -5   4   0 256.123 20.8652   2
  -5   4   1 57187.7 5221.31   7
  -5   4   1 55512.3 5220.98   2
  -4  -5   1 56201.3 5221.72   8
  -4  -5   1 55886.0 5221.32   2
   4   5   1 54970.7 5221.82   6
  -4  -5   1 53053.2 5222.19   5
   4   5   1 57454.9 5221.48   5
  -4  -5   1 56725.8 5221.04   1
   5  -4   1 56292.9 5221.67   4
  -5   4   1 55680.7 5222.55   8
   4   5   1 55227.7 5221.71   1
   4   5   1 54648.2 5222.28   2
  -4  -5   1 57688.7 5221.00   6
   4   5   1 56799.2 5221.73   7
   4   5   1 56719.5 5221.59   5
   5  -4   1 55337.6 5221.84   7
   5  -4   1 59610.0 5221.27   3
   5  -4   1 58032.4 5221.71   8
  -5   4   1 58240.3 5221.72   1
   5  -4   1 55035.2 5221.98   2
  -4  -5   2 1258.87 88.6190   1
  -5   4   2 1201.75 88.6703   2
   5  -4   2 807.034 89.3595   7
   4   5   2 880.281 87.8869   5
   5  -4   2 783.613 88.0866   8
   4   5   2 1256.83 91.0397   2
   4   5   2 816.555 88.5151   7
   5  -4   2 796.406 89.3047   5
  -5   4   2 1317.08 90.1571   1
   4   5   2 811.732 87.6311   5
   5  -4   2 1056.63 89.0285   3
   4   5   2 1364.06 90.5902   1
  -4  -5   2 891.063 90.0728   4
  -4  -5   2 1122.79 89.1456   2
  -4  -5   2 803.517 88.4073   8
  -4  -5   2 826.022 89.9525   5
   5  -4   2 814.857 88.1057   4
   4   5   2 839.580 88.5013   4
   4   5   3 4871.95 449.373   7
  -5   4   3 5008.01 450.894   6
  -5   4   3 4897.24 450.576   1
  -4  -5   3 4869.47 450.769   4
   5  -4   3 4764.35 450.606   7
  -5   4   3 4972.28 449.400   2
   5  -4   3 4615.87 450.043   3
   4   5   3 4712.92 450.691   1
   4   5   3 4777.29 449.217   4
   5  -4   3 4858.74 448.929   8
  -5   4   3 4957.87 449.109   3
   5  -4   3 4692.72 450.387   5
  -4  -5   3 4803.37 449.399   8
   5  -4   3 4931.57 449.000   4
   4   5   3 4577.23 450.926   2
  -4  -5   3 4922.91 449.339   1
  -5   4   4 23.4858 13.7778   1
   5  -4   4 20.9376 7.62659   8
  -5   4   4 39.0857 9.52905   3
  -5   4   4 3.87068 15.7930   6
  -4  -5   4 5.06074 9.28554   8
   4   5   4 26.4207 8.23020   4
  -5   4   4 14.8249 15.1617   8
   5  -4   4 14.3756 14.3093   5
   5  -4   4 17.8821 12.3518   3
   4   5   4 7.28629 9.28560   7
  -4  -5   4 30.7797 13.2120   4
   4   5   4 33.9833 14.5535   3
   4   5   4 78.0734 15.3100   1
  -5   4   4 48.6467 9.81876   2
   5  -4   4 26.8479 7.41258   4
   5  -4   5 1782.24 192.813   3
  -4  -5   5 2116.63 194.630   5
  -5   4   5 2274.41 194.268   8
  -5   4   5 1949.60 191.610   2
   5  -4   5 2095.05 190.612   8
  -4  -5   5 2369.33 194.577   7
  -4  -5   5 2171.97 191.468   8
  -5   4   5 2040.00 191.876   3
   4   5   5 1849.55 193.519   1
  -5   4   5 2014.82 193.477   1
   4   5   5 2092.53 191.596   7
  -5   4   5 2235.87 194.398   6
   4   5   5 1787.03 193.362   3
   4   5   5 1935.98 190.405   4
  -4  -5   5 2126.31 193.193   4
   5  -4   5 2073.82 193.492   5
   4   5   6 718.096 34.3424   1
  -5   4   6 493.747 30.6380   6
   4   5   6 420.090 23.9611   7
   5  -4   6 366.829 28.7675   7
  -4  -5   6 469.747 28.3356   4
   4   5   6 519.441 31.8641   3
   4   5   6 396.863 19.3802   4
  -4  -5   6 425.808 21.9166   8
  -5   4   6 780.043 34.0102   1
  -5   4   6 733.079 28.3336   2
   5  -4   6 478.820 29.3377   5
  -5   4   6 407.212 29.9861   8
  -4  -5   6 462.567 32.4688   7
  -5   4   6 525.777 26.5955   3
  -4  -5   6 534.657 33.3698   5
   5  -4   6 521.701 31.3747   3
   4   5   6 669.733 33.8916   2
   4   5   6-13.3841 14.3033   5
  -5   4   7 303.812 35.6796   1
  -5   4   7 251.054 35.2689   6
   4   5   7 253.856 36.5507   2
  -4  -5   7 310.943 37.4767   7
  -4  -5   7 292.146 38.0520   5
   4   5   7 220.074 35.3117   3
   4   5   7 270.179 32.2045   7
  -5   4   7 313.093 33.3559   3
   5  -4   7 303.835 35.0263   5
   4   5   7 216.306 35.2461   1
  -5   4   7 313.151 32.1811   2
  -4  -5   7 249.760 29.2108   8
   5  -4   7 216.555 34.9692   3
  -4  -5   7 241.838 32.9499   4
   5  -4   7 270.459 36.8324   7
  -5   4   8 56.6759 20.5478   2
  -4  -5   8 46.3416 19.4597   4
  -4  -5   8 2.29311 27.6761   7
  -4  -5   8-2.34024 26.1050   5
  -5   4   8 71.3907 27.2103   6
   5  -4   8 60.5216 24.6403   5
  -5   4   8 31.9520 19.2358   7
   4   5   8 56.5773 24.8857   3
   4   5   8 78.5123 20.4657   7
  -5   4   8 54.7382 24.6622   1
  -5   4   8 45.3410 21.9896   3
   5  -4   8 44.0871 26.1039   3
   5  -4   8 13.7226 24.5284   7
   4   5   8 71.7786 26.2576   1
   4   5   8 91.4273 27.1373   2
   4   5   9 8.01344 30.2246   3
   4   5   9-5.37200 32.3208   1
  -5   4   9 12.0189 23.8121   3
  -5   4   9 63.1436 23.1633   7
  -4  -5   9 30.7844 30.8288   5
  -4  -5   9 25.5589 32.7861   7
   4   5   9 43.7464 23.1136   7
   5  -4   9 46.2514 32.3298   7
   5  -4   9 31.9615 28.9681   5
  -4  -5   9 9.21200 22.8360   4
   4   5   9 62.6003 30.6576   2
   5  -4   9 17.5865 29.9452   3
  -5   4   9 38.9197 27.3406   1
  -4  -5  10-8.42313 29.9472   5
   4   5  10 2.99010 28.0955   3
   5  -4  10 79.3129 27.1326   5
   5  -4  10 22.5438 26.4895   3
  -5   4  10 56.0591 23.0223   2
   4   5  10 5.71451 26.7830   2
   5  -4  10 59.6306 28.7803   7
  -5   4  10 100.154 26.3262   3
  -5   4  10 62.1948 26.4408   1
   4   5  10-1.98609 21.8171   7
  -5   4  10 8.35043 19.9569   7
  -4  -5  10-19.6791 21.9181   4
  -4  -5  10 39.6366 31.9874   7
   5  -4  11-3.14827 27.8612   7
  -4  -5  11 54.0464 28.5352   5
  -4  -5  11-42.6289 32.7535   7
   5  -4  11-11.2068 28.8678   5
  -5   4  11 51.1121 24.0401   3
   4   5  11 12.5822 28.5934   2
   5  -4  11 18.7409 29.2051   3
   4   5  11 6.56490 28.5977   3
  -5   4  11 17.9533 27.0451   1
  -5   4  11 27.5059 21.5714   2
   4   5  12 17.0916 30.9462   2
  -5   4  12-33.7320 29.6420   3
   5  -4  12-24.1812 29.4458   5
  -4  -5  12-26.6431 35.4941   7
   4   5  12 10.6913 30.6175   3
  -5   4  12 36.2126 28.5576   1
   5  -4  12-3.43472 32.0790   7
  -4  -5  12-12.8339 32.0350   5
  -4  -5  13 17.8430 34.5033   7
  -4  -5  13 6.78486 33.2184   5
  -5   4  13-27.6797 31.2976   3
   4   5  13 3.84021 32.7817   3
   4   5  13 3.64857 32.4505   2
   5  -4  13 56.4443 34.3676   7
   4   5  14-7.80519 35.5427   2
  -4  -5  14 18.9575 38.2240   7
  -5   4  14-13.3662 31.8953   3
   5  -4  14-16.1541 37.9307   7
   4   5  14 82.4188 37.7464   3
  -4  -5  15 15.9072 39.5655   7
   5  -4  15 30.3956 41.8099   7
   5  -3 -15-27.5752 33.3983   1
   3   5 -15 8.74526 39.2332   1
   3   5 -15 8.65266 41.7135   3
  -3  -5 -15 15.3188 39.4110   6
  -5   3 -14 28.0573 41.0743   1
   5  -3 -14 66.3760 32.0874   1
  -3  -5 -14-43.9255 38.8217   1
  -5   3 -14-9.03228 41.8269   2
  -3  -5 -14 21.7487 33.3838   6
   3   5 -14 12.1093 36.1096   1
   5  -3 -14-39.6118 32.3973   6
   3   5 -14-37.4400 33.0900   2
   3   5 -14-24.8912 37.9907   3
  -5   3 -13-46.0343 39.9359   2
   5  -3 -13 27.7490 26.4139   8
  -3  -5 -13-8.02377 28.3879   8
   5  -3 -13 21.9842 28.8474   6
  -5   3 -13-40.6985 28.9810   6
  -3  -5 -13 13.6077 33.2254   6
   5  -3 -13-20.5672 32.0172   1
   3   5 -13-11.0517 31.2378   1
   3   5 -13-15.7132 36.3863   3
   3   5 -13 39.1220 34.1188   2
  -5   3 -13-29.7427 35.9075   1
  -5   3 -12-2.45945 24.0824   6
  -3  -5 -12-10.1361 27.9609   8
  -3  -5 -12-9.44861 29.4170   6
   3   5 -12 20.0455 30.2465   1
  -5   3 -12 64.5008 34.0464   1
   3   5 -12-3.32513 31.2267   2
   3   5 -12-58.8393 33.7757   3
   5  -3 -12 72.6760 28.6911   1
   5  -3 -12 17.6489 27.7745   6
   5  -3 -12-5.38835 25.7121   8
  -5   3 -12-11.7156 33.2226   2
  -5   3 -11-24.6504 22.3733   6
  -5   3 -11 16.9753 31.6189   1
   5  -3 -11 23.3192 22.8998   8
  -3  -5 -11 14.4690 27.8298   6
   3   5 -11 2.96643 24.8976   1
  -5   3 -11 3.60778 30.5877   2
  -3  -5 -11-14.2135 24.5437   8
   3   5 -11 9.18555 27.6357   2
   5  -3 -11-12.3568 20.3628   4
   3   5 -11-3.39741 27.0207   3
   5  -3 -11 35.2876 25.8329   6
   5  -3 -10 4.92337 23.8887   8
   3   5 -10-2.76400 25.3410   2
  -3  -5 -10 2.64856 27.0982   6
   5  -3 -10 45.6953 23.3190   5
  -5   3 -10 14.1431 21.2008   6
   5  -3 -10 9.70434 19.6009   4
  -5   3 -10 42.5672 30.3508   2
   3   5 -10 43.2170 30.3957   3
  -3  -5 -10 35.1037 22.8650   8
   3   5 -10-36.7988 24.7789   1
   5  -3 -10 14.9742 25.2438   6
   5  -3  -9 315.915 38.7569   4
   3   5  -9 308.732 48.2065   3
  -3  -5  -9 281.390 44.4341   6
   5  -3  -9 352.480 42.7545   5
  -5   3  -9 250.631 33.2863   8
   5  -3  -9 268.297 42.2572   8
  -5   3  -9 232.798 37.8012   6
   3   5  -9 257.679 34.5759   6
   5  -3  -9 185.386 40.9113   6
   3   5  -9 459.817 46.8874   2
  -3  -5  -9 209.521 40.3175   8
  -5   3  -9 404.867 50.1807   2
   3   5  -9 349.733 43.7022   1
   5  -3  -8 186.843 27.5767   4
   5  -3  -8 128.196 29.1126   8
  -3  -5  -8 146.860 30.3581   6
  -3  -5  -8 221.731 30.5989   8
  -3  -5  -8 160.930 20.4776   4
  -5   3  -8 183.034 26.8651   6
  -5   3  -8 158.793 22.5341   8
   3   5  -8 176.882 23.6408   6
   3   5  -8 236.724 34.2848   3
   3   5  -8 145.100 29.8638   1
   3   5  -8 161.183 22.7721   8
   3   5  -8 167.988 30.5516   2
   5  -3  -8 180.876 29.3886   5
   3   5  -7 109.479 17.0378   6
   5  -3  -7 95.7155 21.9039   5
  -5   3  -7 79.9810 20.1806   6
  -3  -5  -7 117.347 25.7757   6
   5  -3  -7 79.7571 19.9962   4
   3   5  -7 118.203 26.2198   3
  -5   3  -7 95.2472 16.1758   8
  -3  -5  -7 87.6271 22.3120   8
  -3  -5  -7 123.773 15.4744   4
   3   5  -7 121.617 24.2304   2
   5  -3  -6 527.967 46.8524   4
   3   5  -6 466.090 43.1718   8
   3   5  -6 441.660 43.4075   6
  -3  -5  -6 478.688 41.5059   5
  -5   3  -6 487.931 43.5181   8
  -5   3  -6 502.276 46.3526   6
  -5   3  -6 460.179 47.8202   1
   3   5  -6 454.038 47.8823   3
   3   5  -6 480.460 47.0628   2
  -5   3  -6 364.131 40.6992   4
  -3  -5  -6 652.406 48.4214   8
  -5   3  -6 565.976 50.6330   2
   5  -3  -6 472.749 46.1287   5
   3   5  -6 461.050 46.4268   1
  -3  -5  -6 476.582 43.1723   4
  -5   3  -5 591.014 60.1288   4
   5  -3  -5 704.326 65.3007   4
   5  -3  -5 704.396 64.4492   5
  -5   3  -5 609.559 64.3432   6
  -5   3  -5 988.932 69.3644   2
  -3  -5  -5 640.973 62.0416   4
   3   5  -5 574.028 61.6218   8
  -5   3  -5 1074.86 68.8973   1
   3   5  -5 680.192 65.9585   3
  -3  -5  -5 666.252 65.4744   8
  -3  -5  -5 576.591 60.1405   5
  -5   3  -5 640.655 62.0424   8
   3   5  -5 1063.06 66.5477   1
   3   5  -5 1006.80 66.7773   2
   3   5  -5 640.195 61.2777   6
   3   5  -5 614.852 61.6127   6
   5  -3  -4 3963.38 371.564   3
  -3  -5  -4 4153.89 371.338   7
  -5   3  -4 4145.67 373.977   2
  -3  -5  -4 4029.24 373.403   6
   5  -3  -4 4047.47 371.535   2
   5  -3  -4 3892.39 372.369   5
   5  -3  -4 4109.14 373.104   4
   3   5  -4 4105.20 372.484   1
   3   5  -4 3921.12 373.140   3
  -5   3  -4 4145.35 371.546   8
  -3  -5  -4 4067.52 373.083   8
   3   5  -4 3917.71 372.625   2
   3   5  -4 3959.81 370.518   6
  -3  -5  -4 4241.00 371.599   4
  -5   3  -4 3890.70 370.513   4
  -5   3  -4 4124.48 372.801   6
   3   5  -4 3959.93 371.123   8
  -5   3  -4 4160.57 373.761   1
   3   5  -4 3789.07 370.708   6
  -5   3  -3 134.664 16.0451   8
   3   5  -3 120.532 13.9947   6
  -3  -5  -3 107.007 15.9688   7
  -5   3  -3 185.923 20.5067   2
   5  -3  -3 144.143 19.1850   4
  -5   3  -3 200.345 20.3298   1
  -3  -5  -3 121.014 19.4606   6
  -5   3  -3 145.324 18.4150   6
   3   5  -3 235.869 18.2645   1
   5  -3  -3 136.479 16.8682   7
   5  -3  -3 153.576 18.1498   5
   5  -3  -3 235.692 16.2114   2
  -5   3  -3 139.433 15.1877   4
   3   5  -3 134.575 15.4287   8
   5  -3  -3 170.446 15.7990   3
  -3  -5  -3 137.508 16.7250   4
   3   5  -3 134.101 18.8237   3
   5  -3  -3 114.989 15.4896   7
   3   5  -3 221.448 18.6791   2
  -3  -5  -2 24544.7 2307.32   8
  -3  -5  -2 24448.5 2306.25   7
  -5   3  -2 24792.3 2306.73   8
  -3  -5  -2 24026.4 2307.36   6
   5  -3  -2 25451.4 2305.79   2
   3   5  -2 25439.9 2306.24   8
   5  -3  -2 26255.9 2306.61   1
  -5   3  -2 25313.9 2306.85   3
  -5   3  -2 24241.1 2307.53   2
  -5   3  -2 25056.7 2307.40   6
   3   5  -2 24797.9 2306.51   1
   5  -3  -2 24225.1 2305.64   3
  -5   3  -2 24925.7 2307.64   1
  -3  -5  -2 24668.3 2306.69   4
   3   5  -2 25366.6 2306.72   2
   5  -3  -2 25533.9 2306.49   7
  -5   3  -2 25402.7 2306.35   4
   5  -3  -2 24275.6 2306.91   5
   3   5  -1 399.381 46.2787   7
   5  -3  -1 583.771 45.1880   2
  -5   3  -1 583.461 46.7100   2
  -5   3  -1 481.547 45.3779   3
   3   5  -1 384.871 44.5794   6
   3   5  -1 675.473 45.5768   1
  -3  -5  -1 745.147 46.3416   1
  -3  -5  -1 421.038 46.2626   8
  -3  -5  -1 416.661 45.1800   5
  -5   3  -1 389.871 45.5478   4
   3   5  -1 424.759 46.7695   5
   3   5  -1 632.130 46.1842   2
  -3  -5  -1 441.525 46.2209   4
  -3  -5  -1 428.043 45.9562   6
  -5   3  -1 404.729 45.8399   7
  -5   3  -1 730.357 47.3482   1
   5  -3  -1 396.156 46.0665   5
  -5   3  -1 404.947 46.0266   8
   5  -3  -1 392.062 45.3660   7
   5  -3  -1 451.419 46.7735   4
   3   5  -1 415.870 45.3571   8
  -5   3  -1 379.113 46.2950   6
   5  -3  -1 644.157 46.0657   1
   3   5   0 35837.6 3441.20   1
   5  -3   0 36719.6 3441.54   1
  -3  -5   0 37205.9 3441.19   6
   3   5   0 37634.3 3441.57   8
  -3  -5   0 37759.7 3441.06   1
   5  -3   0 38760.7 3441.95   8
  -3  -5   0 37217.4 3442.06   4
   3   5   0 36447.7 3441.25   6
   5  -3   0 37175.8 3441.43   7
   3   5   0 37359.4 3441.77   4
  -5   3   0 36904.3 3441.40   1
  -3  -5   0 36773.0 3441.69   5
   3   5   0 37442.0 3441.69   5
  -3  -5   0 37823.5 3441.40   2
  -5   3   0 37462.7 3441.22   2
   5  -3   0 37180.9 3441.40   2
   5  -3   0 38202.2 3442.01   4
  -3  -5   0 37910.6 3441.60   8
  -5   3   0 36819.9 3441.46   7
   3   5   0 36775.5 3441.74   2
  -5   3   0 37356.9 3440.57   3
  -5   3   0 36592.0 3442.06   8
   3   5   1 446.844 11.7276   5
   5  -3   1 392.050 13.9472   7
  -5   3   1 588.224 9.97235   2
  -5   3   1 391.588 12.3289   7
   5  -3   1 661.535 17.7821   1
  -3  -5   1 430.241 16.4013   5
   3   5   1 393.185 13.7766   6
  -5   3   1 366.913 15.5865   8
  -3  -5   1-2.83423 2.65820   6
  -3  -5   1 419.606 12.2126   8
  -3  -5   1 617.613 14.4001   2
  -3  -5   1 692.666 13.6964   1
  -5   3   1 723.869 15.2335   1
   5  -3   1 533.904 11.9942   3
   3   5   1 636.270 19.0329   2
   5  -3   1 551.400 15.5412   2
   5  -3   1 425.083 13.4121   8
  -5   3   1 435.571 14.8979   5
   3   5   1 450.261 14.1131   4
   3   5   1 422.519 12.6228   7
   3   5   1 712.442 16.8200   1
   5  -3   1 430.916 13.0012   4
   3   5   2 25298.2 2301.19   7
  -3  -5   2 25281.8 2302.37   4
   5  -3   2 23857.4 2301.62   3
  -3  -5   2 24803.6 2302.67   5
   3   5   2 24590.1 2300.63   5
   3   5   2 24318.2 2302.23   1
   5  -3   2 25166.7 2301.30   8
   5  -3   2 25047.5 2301.07   4
  -5   3   2 25151.4 2301.76   1
   3   5   2 24265.3 2301.41   4
  -3  -5   2 27595.8 2302.55   7
  -5   3   2 24421.4 2302.09   6
  -3  -5   2 25028.7 2301.41   1
  -3  -5   2 25392.4 2301.26   8
   5  -3   2 25045.3 2301.90   5
  -3  -5   2 24473.3 2301.74   2
  -5   3   2 24984.0 2300.92   2
   3   5   2 24114.0 2302.17   3
   5  -3   2 24573.2 2302.03   7
   5  -3   3 187.779 20.7125   3
   5  -3   3 155.875 17.4439   4
  -3  -5   3 131.501 17.7106   8
  -5   3   3 268.758 21.6062   1
  -5   3   3 146.865 21.9460   8
   5  -3   3 129.938 17.7076   8
  -5   3   3 234.769 18.6506   2
   3   5   3 174.320 20.9457   3
  -3  -5   3 143.878 20.6208   4
  -3  -5   3 279.633 19.6336   1
   3   5   3 236.002 22.5153   1
   3   5   3 133.319 17.8881   7
   3   5   3 150.618 18.1050   4
  -5   3   3 158.754 21.1571   6
  -5   3   3 197.417 18.1680   3
   5  -3   3 119.918 19.7661   5
  -5   3   4 3909.68 356.749   3
  -3  -5   4 3841.82 356.351   8
   5  -3   4 3769.09 357.963   3
  -5   3   4 3879.34 358.309   6
  -3  -5   4 3690.60 357.704   4
   3   5   4 3916.69 356.547   7
   3   5   4 3658.50 358.083   3
  -5   3   4 3758.32 357.919   1
  -5   3   4 3658.99 358.333   8
   3   5   4 3795.15 358.639   1
   3   5   4 3925.66 356.343   4
  -3  -5   4 3784.14 358.889   5
  -5   3   4 3985.68 356.764   2
   5  -3   4 3848.25 356.279   8
   5  -3   4 3834.54 357.899   5
  -5   3   5 879.942 77.6415   3
  -3  -5   5 753.634 78.3108   4
   3   5   5 1115.21 81.7526   1
   5  -3   5 759.016 78.7427   5
   5  -3   5 865.860 80.0298   3
  -3  -5   5 774.324 80.5832   5
   5  -3   5 703.608 79.4398   7
   3   5   5 731.232 76.6872   7
   3   5   5 857.392 80.1688   3
  -5   3   5 689.972 79.1521   6
   3   5   5 618.031 75.5396   4
  -5   3   5 1208.10 78.2441   2
  -3  -5   5 684.395 79.7180   7
  -5   3   5 710.367 79.0856   8
  -5   3   5 1282.13 81.3352   1
  -3  -5   5 678.308 75.8303   8
   3   5   5 1039.69 81.0094   2
  -5   3   6 467.179 51.6949   1
  -3  -5   6 489.981 53.2141   7
  -5   3   6 582.051 50.5312   2
  -5   3   6 525.708 52.8898   8
  -5   3   6 521.381 53.1483   6
   3   5   6 510.606 47.3118   5
   3   5   6 451.598 49.3040   7
   5  -3   6 391.411 52.2132   3
   3   5   6 490.159 53.1151   2
  -3  -5   6 492.969 50.9888   4
   3   5   6 475.189 53.0780   3
  -3  -5   6 485.355 48.2491   8
  -5   3   6 466.608 50.3624   3
   5  -3   6 548.129 52.2394   5
   5  -3   6 491.766 52.8042   7
   3   5   6 464.981 52.9374   1
  -3  -5   6 524.019 54.3065   5
  -5   3   7 125.199 21.8728   3
  -3  -5   7 116.336 26.9840   7
  -3  -5   7 79.2585 20.4895   4
   5  -3   7 137.991 25.2901   3
  -5   3   7 110.952 24.4774   6
  -5   3   7 94.0261 20.6402   7
   5  -3   7 150.876 24.0814   5
  -5   3   7 95.7301 22.5152   8
   3   5   7 141.797 25.4454   2
  -5   3   7 207.061 26.0232   1
   3   5   7 181.058 26.7813   1
  -5   3   7 194.064 21.4095   2
   5  -3   7 120.624 25.1712   7
   3   5   7 132.290 25.9500   3
   3   5   7 130.295 20.8752   7
  -3  -5   7 63.8669 25.0370   5
  -5   3   8 188.122 31.2493   6
  -5   3   8 155.245 26.5107   7
   5  -3   8 151.125 31.9825   3
  -5   3   8 180.078 29.2794   1
  -3  -5   8 152.078 32.4316   5
  -3  -5   8 162.325 31.7745   7
   5  -3   8 148.750 30.2554   7
  -3  -5   8 146.899 25.2777   4
   3   5   8 143.082 24.6990   7
   5  -3   8 128.346 28.8206   5
   3   5   8 172.499 30.5593   2
   3   5   8 196.952 31.7733   3
  -5   3   8 178.747 27.1168   3
  -5   3   8 176.284 25.5004   2
   3   5   9 293.374 40.1235   7
  -3  -5   9 255.950 40.1889   4
   3   5   9 404.942 48.4613   2
  -5   3   9 260.817 41.3012   7
   5  -3   9 350.046 49.5225   3
  -3  -5   9 234.482 46.8427   7
  -5   3   9 382.007 42.9971   3
  -5   3   9 457.544 47.2651   1
   5  -3   9 269.925 43.7347   5
  -5   3   9 468.697 42.7258   2
   3   5   9 359.826 48.3824   3
   5  -3   9 249.981 47.3334   7
  -3  -5   9 253.868 46.4827   5
   3   5  10 42.2361 21.8325   7
   5  -3  10-14.1212 29.1513   3
  -3  -5  10 41.9975 28.5741   7
  -5   3  10 34.2710 19.7658   2
   3   5  10 87.7533 30.7248   3
   3   5  10 11.1084 24.9452   2
   5  -3  10 24.8267 27.6981   7
  -3  -5  10-11.1434 26.5379   5
   5  -3  10 38.4822 25.5682   5
  -3  -5  10 18.0946 19.3338   4
  -5   3  10 41.6857 23.4462   7
  -5   3  10 2.26337 22.7090   3
  -5   3  10 20.9243 23.9211   1
  -5   3  11 12.1922 23.8732   7
  -5   3  11-13.4761 22.3709   2
   5  -3  11 39.4148 28.8550   7
  -3  -5  11-58.6628 34.5301   7
   3   5  11 3.06133 26.8070   2
  -3  -5  11 18.0025 27.8672   5
  -5   3  11 2.90927 26.8702   1
   3   5  11 63.8793 30.8759   3
  -5   3  11 2.53633 23.4261   3
   5  -3  11-15.9548 27.5512   5
   3   5  12 26.6364 30.3157   2
  -3  -5  12-3.38904 34.3195   7
   3   5  12-38.3976 33.1320   3
   5  -3  12 40.0988 30.1601   7
   5  -3  12-8.60783 29.7936   5
  -5   3  12-7.44470 24.2334   2
  -5   3  12 8.42691 28.0439   3
  -3  -5  13 50.5408 30.5095   5
   3   5  13 3.76597 34.2972   3
  -5   3  13 24.6952 29.5416   3
  -3  -5  13 11.0462 36.5017   7
   3   5  13-17.7918 32.9643   2
   5  -3  13-32.9595 36.5692   7
   3   5  14 11.3667 33.5915   2
  -5   3  14 33.5948 33.6233   3
   5  -3  14 3.93166 37.1210   7
  -3  -5  14-38.7627 40.4305   7
   3   5  14 8.05625 36.3594   3
   3   5  15-59.8900 41.5623   3
  -3  -5  15-36.7470 44.7947   7
   3   5  15-80.3507 37.9547   2
   5  -3  15 16.8996 40.6342   7
   2   5 -15 4.49864 36.7343   1
   2   5 -15 16.0794 34.2149   2
   2   5 -15 34.9992 38.8015   3
   5  -2 -15 15.5986 31.8488   1
  -2  -5 -15 41.8056 33.8149   6
  -5   2 -15-37.2364 40.0023   2
   2   5 -14 37.6676 37.0201   3
  -5   2 -14-8.84739 37.7843   2
   2   5 -14-8.28773 37.1006   1
   5  -2 -14-19.3278 31.7291   6
  -2  -5 -14-26.0449 39.5520   1
  -5   2 -14 64.4307 41.0742   1
   5  -2 -14 39.9658 35.6007   1
   2   5 -14 11.6057 36.4557   2
  -2  -5 -14 79.4069 35.2791   6
  -2  -5 -13 4.02463 32.3819   1
   5  -2 -13-26.9365 30.6692   1
  -5   2 -13 66.7776 27.2526   6
  -5   2 -13 54.3124 36.2479   1
  -5   2 -13 29.1310 34.3395   2
   2   5 -13-3.77758 32.2512   1
   2   5 -13-33.0261 33.8063   2
   2   5 -13-15.8834 36.8887   3
  -2  -5 -13-10.1469 34.4214   6
   5  -2 -13 12.2468 30.1351   6
  -2  -5 -13 13.5811 29.5633   8
   5  -2 -12-6.19588 29.0916   1
   2   5 -12 6.84509 31.1640   2
   2   5 -12-6.84428 30.6152   1
  -5   2 -12-11.5462 35.3467   2
   5  -2 -12-40.7255 24.6071   2
  -2  -5 -12-6.28105 29.8893   6
   5  -2 -12 57.2240 28.3603   6
  -5   2 -12 14.9694 33.3792   1
  -2  -5 -12-30.8664 25.4962   8
   2   5 -12-14.8766 33.9621   3
   5  -2 -12 17.8545 24.5950   8
  -2  -5 -12 3.70787 32.4686   1
  -2  -5 -11-37.7682 30.3348   6
  -5   2 -11-17.5842 31.9605   2
   2   5 -11 6.31073 27.0562   2
  -2  -5 -11-24.1120 25.5188   8
  -5   2 -11-18.3755 22.5325   6
   2   5 -11-30.9448 29.7627   3
   5  -2 -11-18.6448 20.0775   4
   2   5 -11 21.2689 26.4774   1
   5  -2 -11-4.89236 22.7011   8
   5  -2 -11-26.3587 25.9090   6
   2   5 -10-3.13281 29.7482   3
   5  -2 -10 2.31571 22.5739   8
   5  -2 -10 29.0183 25.1251   6
  -2  -5 -10 2.23649 23.0845   8
   2   5 -10 40.0828 28.1822   2
  -5   2 -10 20.6932 19.5038   6
   5  -2 -10-5.83989 21.1967   4
  -5   2 -10 47.6932 28.7112   2
   2   5 -10-3.04395 17.9327   6
  -2  -5 -10-29.2763 27.4651   6
   2   5 -10 29.6272 24.5392   1
  -5   2  -9 250.935 36.4077   6
   2   5  -9 257.977 42.4644   2
   5  -2  -9 310.265 36.0612   4
  -2  -5  -9 293.084 42.6435   6
  -2  -5  -9 254.107 37.9531   8
   2   5  -9 266.626 45.1090   3
   2   5  -9 278.582 40.0075   1
   2   5  -9 235.922 32.5460   6
   5  -2  -9 208.522 37.2150   8
   5  -2  -9 277.214 38.5476   6
  -5   2  -9 234.652 31.1691   8
  -5   2  -8 84.9015 24.6042   6
   5  -2  -8 78.8765 23.2937   4
   2   5  -8 116.031 30.9181   3
  -2  -5  -8 129.527 27.3120   8
  -2  -5  -8 160.161 18.9270   4
  -2  -5  -8 144.128 30.6308   6
   2   5  -8 144.234 19.5479   8
   2   5  -8 204.635 28.9159   1
   5  -2  -8 157.043 27.4198   8
  -5   2  -8 120.232 19.9139   8
   2   5  -8 208.272 30.5111   2
   2   5  -8 97.3087 20.7320   6
   2   5  -7 986.412 90.4180   2
   2   5  -7 872.188 88.9104   1
   5  -2  -7 911.179 88.5191   4
   2   5  -7 936.384 86.3990   6
  -5   2  -7 928.060 86.4460   8
  -5   2  -7 892.407 88.3577   6
  -5   2  -7 890.243 90.5953   1
  -2  -5  -7 817.814 85.5137   4
  -2  -5  -7 913.002 90.4177   6
  -2  -5  -7 958.325 89.8507   8
   2   5  -7 891.736 91.1523   3
   2   5  -7 879.967 85.6671   8
   2   5  -6 239.826 28.1385   8
   5  -2  -6 287.414 33.0735   5
  -2  -5  -6 278.161 34.0457   8
   2   5  -6 428.490 34.8530   1
   2   5  -6 359.131 36.0184   3
  -5   2  -6 327.398 32.6173   6
   2   5  -6 264.084 29.0004   6
  -2  -5  -6 242.965 26.6434   5
   2   5  -6 259.127 28.0583   8
  -5   2  -6 448.792 36.2852   1
  -5   2  -6 278.262 29.1123   8
   2   5  -6 403.003 35.7597   2
  -2  -5  -6 241.176 28.5287   4
   2   5  -5 4282.74 407.464   1
   2   5  -5 4645.01 405.590   6
   5  -2  -5 4291.38 407.558   5
   2   5  -5 4268.20 408.363   3
  -5   2  -5 4637.18 406.223   8
   2   5  -5 4259.82 405.492   6
  -5   2  -5 4392.21 407.454   6
  -2  -5  -5 4282.45 404.483   5
  -2  -5  -5 4423.50 405.959   4
  -5   2  -5 4656.15 408.511   1
  -2  -5  -5 4581.59 408.050   8
   2   5  -5 4133.99 407.799   2
   2   5  -5 4283.95 405.272   8
   2   5  -4 866.728 52.6441   1
  -2  -5  -4 484.449 49.4208   4
   2   5  -4 456.568 48.0079   6
   2   5  -4 455.674 48.0179   6
   5  -2  -4 556.072 49.7207   3
  -5   2  -4 461.668 49.2600   8
   5  -2  -4 490.435 51.2763   5
   2   5  -4 446.308 48.1130   8
  -5   2  -4 469.580 50.7034   6
   5  -2  -4 756.381 49.8209   2
  -2  -5  -4 403.906 51.8099   6
  -2  -5  -4 454.321 48.5564   7
  -5   2  -4 802.766 53.8616   1
   2   5  -4 702.794 52.3035   2
  -2  -5  -4 488.542 51.9538   8
   5  -2  -3 545.763 49.0706   5
  -5   2  -3 463.046 49.2691   1
  -5   2  -3 441.667 47.5012   8
   2   5  -3 428.696 48.3260   1
   2   5  -3 483.079 46.6426   8
   2   5  -3 461.758 48.6552   2
  -2  -5  -3 541.832 48.0303   4
   5  -2  -3 536.047 47.9866   1
   5  -2  -3 541.971 47.3938   3
  -2  -5  -3 567.114 50.2060   6
   5  -2  -3 445.694 47.2680   7
  -2  -5  -3 529.789 46.9931   7
   5  -2  -3 494.325 46.9032   2
  -5   2  -3 443.516 48.6389   6
   5  -2  -2 567.585 65.0657   5
  -2  -5  -2 627.338 64.7103   4
  -5   2  -2 870.234 66.3029   1
  -5   2  -2 685.792 64.8883   3
  -2  -5  -2 576.068 63.6839   7
   5  -2  -2 591.488 63.4880   3
  -2  -5  -2 537.485 65.2947   6
  -5   2  -2 756.818 65.8319   2
   5  -2  -2 708.499 63.5201   3
  -5   2  -2 520.305 64.5050   8
   2   5  -2 964.374 65.4201   1
   5  -2  -2 1012.27 64.8735   1
  -5   2  -2 550.769 65.1601   6
   5  -2  -2 541.608 64.3402   7
  -2  -5  -2 574.547 65.4637   8
   2   5  -2 824.228 65.2581   2
   2   5  -2 521.622 63.4817   8
  -5   2  -2 929.315 65.7995   2
   5  -2  -2 864.131 63.3828   2
   2   5  -1 90772.0 8599.09   1
   5  -2  -1 92986.6 8598.60   2
  -5   2  -1 94095.9 8599.69   1
  -2  -5  -1 93057.6 8599.59   2
   5  -2  -1 93586.5 8599.41   7
   5  -2  -1 93644.8 8600.10   4
   5  -2  -1 90893.6 8598.96   1
  -5   2  -1 96100.3 8599.38   2
  -5   2  -1 90889.4 8599.55   2
  -2  -5  -1 91870.9 8599.60   4
  -5   2  -1 93849.7 8599.46   7
  -2  -5  -1 91261.7 8599.60   6
  -5   2  -1 95860.1 8599.08   3
   2   5  -1 92274.8 8599.81   5
   5  -2  -1 94399.1 8599.71   5
  -2  -5  -1 91297.5 8598.91   5
  -2  -5  -1 96647.4 8599.35   1
   2   5  -1 93375.1 8599.71   7
   2   5  -1 91934.7 8599.35   2
  -2  -5  -1 92482.3 8599.72   8
  -5   2  -1 92435.3 8599.70   8
   2   5  -1 93307.7 8599.01   8
   5  -2  -1 94629.1 8599.99   8
   5  -2   0 258.621 22.7058   2
   2   5   0 272.577 24.1065   2
   5  -2   0 239.686 21.7435   3
   2   5   0 186.438 23.7261   4
  -2  -5   0 292.591 23.5948   2
   2   5   0 160.120 22.9658   8
  -2  -5   0 176.711 22.6052   6
   5  -2   0 331.725 23.5059   1
  -2  -5   0 170.567 22.4383   6
  -5   2   0 194.884 23.5881   5
  -5   2   0 292.523 22.7912   2
  -5   2   0 231.817 21.6541   3
   2   5   0 182.133 23.1085   7
   5  -2   0 202.849 23.7282   8
  -5   2   0 332.681 23.3848   1
   5  -2   0 206.489 23.6243   4
   2   5   0 177.985 23.0407   5
  -2  -5   0 179.609 23.4041   5
  -2  -5   0 324.012 23.1493   1
  -5   2   0 218.954 24.3020   8
   5  -2   0 193.631 23.2096   7
   2   5   0 285.975 23.1345   1
  -2  -5   0 203.992 23.2114   8
   2   5   0 212.973 24.4959   3
  -5   2   0 190.130 23.4303   7
   5  -2   0 200.184 23.6505   4
   5  -2   1 91636.1 8521.24   1
  -2  -5   1 91451.3 8521.25   7
  -2  -5   1 91740.7 8521.62   5
   5  -2   1 92055.5 8521.13   5
  -5   2   1 92987.4 8520.96   7
   5  -2   1 94017.3 8521.00   4
  -5   2   1 90998.0 8521.28   6
   5  -2   1 100390. 8521.18   4
   2   5   1 92326.0 8520.61   7
   5  -2   1 95435.4 8521.17   8
  -5   2   1 90893.3 8521.28   5
  -2  -5   1 88404.2 8520.05   6
   5  -2   1 94340.0 8520.73   3
   2   5   1 90745.2 8522.56   3
  -5   2   1 93881.9 8520.70   1
   2   5   1 90184.0 8521.32   8
   2   5   1 92299.2 8521.12   4
   5  -2   1 90627.9 8521.13   7
  -2  -5   1 91631.2 8520.99   2
   2   5   1 92165.2 8521.26   1
  -2  -5   1 94463.4 8520.61   8
   5  -2   1 93288.1 8521.45   6
   2   5   1 93994.9 8520.48   5
  -2  -5   1 84957.6 8521.43   4
  -2  -5   1 92294.7 8520.83   1
  -5   2   2 940.417 18.7827   1
   5  -2   2 508.052 13.6138   8
  -2  -5   2 918.880 18.7770   1
   2   5   2 534.897 11.5547   7
  -2  -5   2 514.932 11.0810   8
   2   5   2 708.034 21.0155   3
  -2  -5   2 581.563 18.8776   4
   2   5   2 593.618 15.1083   4
   2   5   2 904.825 23.0446   1
  -2  -5   2 597.232 20.3568   7
  -2  -5   2 582.891 20.8706   5
   5  -2   2 629.963 13.4760   4
  -5   2   2 575.057 17.8904   6
   5  -2   2 695.044 17.7635   3
   5  -2   2 544.352 16.6759   5
   5  -2   2 542.922 11.2532   4
   2   5   3 521.705 55.7952   2
   2   5   3 605.467 53.5913   7
   2   5   3 568.599 54.0484   4
   2   5   3 559.654 56.0604   1
  -2  -5   3 498.160 53.1809   8
   5  -2   3 538.119 55.3838   2
  -2  -5   3 519.737 55.0842   4
   5  -2   3 568.645 54.8900   5
  -5   2   3 595.038 53.8368   3
  -5   2   3 640.946 55.7787   6
   5  -2   3 531.277 53.1541   4
  -5   2   3 575.813 55.1638   1
   5  -2   3 572.314 53.9665   8
  -5   2   3 546.003 56.0597   8
  -5   2   3 704.429 57.2231   4
  -5   2   3 651.780 53.7468   2
   2   5   3 537.334 55.3837   3
   5  -2   3 516.495 55.2278   3
  -5   2   4 526.529 54.2722   4
  -2  -5   4 396.434 50.2080   8
  -5   2   4 469.421 53.9217   8
   2   5   4 470.726 50.9874   7
   5  -2   4 443.358 51.3666   8
   5  -2   4 764.571 54.8861   2
   2   5   4 546.472 53.8332   3
  -5   2   4 789.939 52.1677   2
   5  -2   4 470.646 53.3048   7
  -2  -5   4 496.879 52.7469   4
  -5   2   4 571.122 51.9537   3
   5  -2   4 638.812 54.3661   3
   2   5   4 744.046 55.5158   2
   5  -2   4 501.553 52.9604   5
  -5   2   4 501.130 53.4417   6
  -2  -5   4 505.582 54.6896   5
   2   5   4 771.841 55.7885   1
  -5   2   4 817.961 54.4639   1
   2   5   4 476.152 51.1193   4
  -5   2   5 4409.28 411.861   6
  -5   2   5 4270.47 411.902   8
  -5   2   5 4316.49 410.594   3
  -5   2   5 4271.95 411.485   1
   2   5   5 4445.42 410.070   7
   5  -2   5 4623.79 412.146   7
  -2  -5   5 4320.64 411.009   4
  -5   2   5 4500.18 410.364   2
   2   5   5 4441.58 412.277   2
   5  -2   5 4435.52 412.213   3
  -2  -5   5 4756.14 413.009   5
   2   5   5 4422.30 412.077   3
  -2  -5   5 4296.95 409.238   8
  -2  -5   5 4714.44 412.676   7
   2   5   5 4192.19 412.376   1
   5  -2   5 4550.78 411.569   5
   2   5   6 331.518 36.8458   3
   5  -2   6 272.993 34.6036   5
   5  -2   6 275.961 36.2613   7
  -5   2   6 380.480 34.6154   3
   2   5   6 445.768 38.4143   2
   5  -2   6 359.639 38.0378   3
   2   5   6 297.671 32.5981   7
  -5   2   6 294.632 33.6905   7
  -5   2   6 288.561 36.4790   6
  -5   2   6 262.490 34.8379   8
  -2  -5   6 267.444 36.7710   7
   2   5   6 252.003 29.7120   5
  -5   2   6 450.011 36.6872   1
  -2  -5   6 268.300 33.7742   4
  -2  -5   6 317.863 38.4260   5
  -5   2   6 459.265 34.6936   2
   2   5   7 959.480 87.8010   7
  -5   2   7 882.015 89.6363   1
   5  -2   7 835.283 90.2348   7
  -5   2   7 915.363 88.8214   3
  -2  -5   7 820.148 87.7555   4
   5  -2   7 839.227 90.6952   3
   5  -2   7 840.026 89.5160   5
  -2  -5   7 1037.63 92.0946   5
  -5   2   7 1001.49 88.8295   7
  -5   2   7 914.792 89.4351   8
   2   5   7 850.256 90.4837   2
   2   5   7 901.545 90.9309   3
  -5   2   7 946.332 90.2938   6
  -5   2   7 843.429 87.8842   2
  -2  -5   7 1041.74 92.2615   7
   5  -2   8 142.301 30.2026   7
  -5   2   8 226.188 29.7514   1
  -5   2   8 219.810 25.6983   2
   2   5   8 197.677 31.1985   2
  -2  -5   8 139.604 31.6356   5
  -2  -5   8 101.231 31.9926   7
   2   5   8 133.191 24.1021   7
  -5   2   8 157.978 29.5148   6
  -2  -5   8 141.651 24.1048   4
   5  -2   8 171.844 30.9205   3
  -5   2   8 154.811 26.6965   3
  -5   2   8 130.012 26.5885   7
   5  -2   8 95.9002 27.1321   5
   2   5   8 118.625 30.2781   3
  -2  -5   9 347.354 45.0802   5
   2   5   9 198.742 39.7028   2
  -5   2   9 227.996 39.2376   1
  -2  -5   9 330.242 45.2594   7
  -5   2   9 246.212 36.3496   7
   2   5   9 260.152 42.6732   3
   2   5   9 275.126 35.5359   7
   5  -2   9 196.666 43.7263   3
  -5   2   9 330.358 38.1710   3
   5  -2   9 234.324 38.3158   5
  -2  -5   9 277.235 33.8364   4
  -5   2   9 279.947 36.3902   2
   5  -2   9 220.925 39.8440   7
   5  -2  10-9.10598 24.7204   5
  -5   2  10 9.71698 23.7284   7
  -2  -5  10 8.38234 27.6967   5
   2   5  10-17.6458 26.4695   1
  -2  -5  10 41.9370 28.1825   7
   5  -2  10 18.5799 26.1177   7
   2   5  10 1.86540 21.0252   7
  -5   2  10 17.8467 23.7479   1
   2   5  10 24.2782 24.0632   2
  -5   2  10-4.52387 23.0696   3
  -5   2  10-9.80908 19.4015   2
   2   5  10-2.84019 27.3878   3
  -5   2  11 8.85626 21.7839   2
   2   5  11-22.8983 32.0244   1
  -5   2  11 20.2873 25.1961   3
  -5   2  11-6.51957 24.1174   7
   2   5  11 11.9078 27.0271   2
   2   5  11-21.8723 29.0198   3
   5  -2  11 12.4721 26.3580   5
  -2  -5  11-6.16792 29.1939   7
  -2  -5  11-12.0348 28.5576   5
   5  -2  11 29.4514 28.2501   7
   5  -2  12 3.24836 30.3366   7
   2   5  12 37.4979 32.0102   3
  -5   2  12-50.7593 31.0506   3
  -2  -5  12 53.9303 34.6089   7
   2   5  12-6.48246 30.6008   2
  -2  -5  12 15.9376 31.9763   5
  -2  -5  13-21.9730 38.0290   7
   2   5  13 6.93399 31.8427   2
   2   5  13-29.4406 33.9908   3
  -5   2  13 3.10522 29.2407   3
   5  -2  13-3.53006 34.8196   7
  -2  -5  13 13.3918 33.5880   5
  -5   2  14-3.37454 35.2702   3
   2   5  14-29.5399 32.0081   2
   2   5  14-19.7829 36.0978   3
   5  -2  14-49.6819 38.1317   7
  -2  -5  14-19.7948 41.4451   7
   5  -2  14-28.3979 40.0780   3
   2   5  15 43.0976 33.0912   2
   5  -2  15 20.5336 37.0428   7
  -2  -5  15 24.7831 41.6102   7
   2   5  15 16.7672 36.3303   3
   1   5 -15-35.2641 41.1763   3
   1   5 -15-4.62164 38.0010   1
   5  -1 -15 49.1765 37.8596   3
   1   5 -15-4.15072 36.3568   2
   5  -1 -15 27.0306 31.9793   1
  -1  -5 -15 11.3292 35.0853   6
  -5   1 -15 27.7602 38.3113   2
   1   5 -14-11.9557 36.1916   2
   1   5 -14-12.7492 39.5883   1
   5  -1 -14 18.0240 33.4910   1
  -1  -5 -14-3.58272 33.1935   6
   1   5 -14-92.8626 42.1505   3
  -5   1 -14 9.11583 37.4762   1
  -5   1 -14 6.22258 29.2287   6
  -1  -5 -14-8.55506 38.9570   1
  -5   1 -14-4.38105 37.1540   2
  -5   1 -13-8.21131 34.2253   1
  -5   1 -13-28.5871 30.0791   6
   1   5 -13-19.4523 36.7312   1
  -1  -5 -13 35.8168 28.0326   8
   1   5 -13 16.0027 37.4658   3
  -1  -5 -13-31.7743 35.3189   1
   1   5 -13-3.76932 37.4518   2
  -5   1 -13-28.5646 38.2147   2
   5  -1 -13-11.8844 28.6489   6
   5  -1 -13 39.8414 31.4311   1
  -1  -5 -13-6.73244 33.2026   6
   5  -1 -12 12.0628 24.3798   8
   5  -1 -12 21.3364 27.3537   1
  -5   1 -12 10.4694 24.3141   6
  -1  -5 -12 18.3322 27.4393   8
   5  -1 -12-2.78799 28.1056   6
  -1  -5 -12 15.7614 30.4765   6
   1   5 -12-31.5080 33.9324   1
   5  -1 -12-7.87380 26.4591   2
  -5   1 -12 37.5587 33.5023   2
   1   5 -12 7.49468 32.8168   3
   1   5 -12-7.05251 31.5493   2
  -1  -5 -11 34.7027 25.9661   8
   5  -1 -11-29.2694 21.4660   4
   1   5 -11-20.8016 32.2878   3
   5  -1 -11-15.2772 25.7843   6
  -5   1 -11 33.0994 23.7168   6
  -1  -5 -11-2.91901 26.7306   6
   5  -1 -11 24.9451 26.3772   1
   1   5 -11 37.3001 27.5553   1
   1   5 -11-51.8370 29.3273   2
   5  -1 -11-7.09906 24.4068   2
   5  -1 -11 6.91911 22.0648   8
  -5   1 -10 23.6155 22.9878   6
   1   5 -10 67.7133 30.9569   2
   5  -1 -10 47.8719 23.3927   8
   5  -1 -10-4.66406 24.4166   6
   5  -1 -10 33.5281 21.2326   4
  -1  -5 -10 13.9052 23.8386   8
  -1  -5 -10 37.6338 26.1895   6
   1   5 -10 38.0197 18.4608   6
  -5   1 -10 15.3747 17.0271   8
   1   5 -10 41.3555 26.2363   1
   1   5  -9 38.3563 19.6921   6
   1   5  -9 97.4161 32.9958   2
  -1  -5  -9 57.7060 27.1534   8
   1   5  -9 106.566 30.0799   1
   5  -1  -9 60.2611 24.8428   8
   5  -1  -9 54.7373 26.6495   6
  -5   1  -9 90.5941 25.1026   6
  -1  -5  -9 61.3104 31.0976   6
   5  -1  -9 62.4251 23.4071   4
  -1  -5  -9 64.7165 17.0069   4
  -5   1  -9 85.1009 20.3470   8
  -5   1  -8 75.8376 22.1939   6
  -1  -5  -8 80.1635 15.3550   4
  -5   1  -8 101.920 18.0349   8
   1   5  -8 80.0047 24.5236   1
  -1  -5  -8 89.8416 25.2952   8
   1   5  -8 58.6920 17.1888   6
  -5   1  -8 37.7442 25.0055   1
  -1  -5  -8 93.1231 26.5293   6
   1   5  -8 73.3371 14.3941   8
   1   5  -8 92.6317 26.5332   2
   1   5  -7 23.8694 23.1152   3
  -5   1  -7 73.6791 17.3820   6
  -1  -5  -7 63.1000 23.3662   6
  -5   1  -7 20.4650 12.9278   8
   1   5  -7 47.6162 12.9318   6
  -5   1  -7 99.8044 22.6029   1
  -1  -5  -7 34.6079 12.1216   4
   1   5  -7 30.0351 21.4650   2
  -1  -5  -7 35.1093 20.4741   8
   1   5  -7 56.1459 20.2290   1
   1   5  -7 23.8367 10.2524   8
  -1  -5  -6 925.215 93.6740   6
  -5   1  -6 951.481 92.0939   6
   1   5  -6 909.165 89.0178   8
  -1  -5  -6 885.268 88.5416   5
  -5   1  -6 1089.02 93.7272   1
   1   5  -6 1039.20 94.0334   2
  -5   1  -6 954.280 90.4615   8
   1   5  -6 945.766 89.8378   6
  -1  -5  -6 990.944 90.0132   4
   1   5  -6 971.989 93.0732   1
   1   5  -6 947.858 89.1284   8
  -1  -5  -6 1027.29 93.5905   8
   1   5  -5 1003.58 94.2276   6
   1   5  -5 962.078 93.9080   6
   1   5  -5 1577.85 99.0028   1
   1   5  -5 962.770 93.2668   8
  -5   1  -5 1050.06 96.5580   6
   1   5  -5 936.169 93.1412   8
  -5   1  -5 1582.35 99.4689   1
   1   5  -5 1389.59 99.0450   2
  -5   1  -5 1006.66 94.8457   8
  -1  -5  -5 873.351 92.6618   5
  -1  -5  -5 1138.36 98.1519   8
  -1  -5  -5 1073.22 94.5400   4
  -1  -5  -5 938.892 93.8030   7
   1   5  -4 12917.0 1147.80   6
   1   5  -4 11804.4 1149.63   1
   1   5  -4 12065.1 1149.89   2
  -5   1  -4 12950.1 1149.64   6
  -5   1  -4 12401.5 1148.66   8
  -1  -5  -4 11672.7 1149.95   6
  -1  -5  -4 12088.7 1148.48   4
   5  -1  -4 12216.6 1149.95   5
  -5   1  -4 12244.6 1149.84   1
   1   5  -4 12293.7 1147.32   8
   1   5  -4 12831.0 1147.64   6
  -1  -5  -4 12749.4 1147.74   7
   5  -1  -4 11991.5 1148.14   2
  -1  -5  -4 12127.6 1149.94   8
  -1  -5  -3 160.171 20.4272   6
   1   5  -3 138.816 15.2293   8
   5  -1  -3 152.226 19.7839   5
   5  -1  -3 265.161 16.9548   2
  -1  -5  -3 147.612 15.9640   7
   1   5  -3 204.768 19.6631   2
   5  -1  -3 273.082 18.3232   1
  -5   1  -3 155.216 17.8344   8
   5  -1  -3 211.057 17.6278   3
  -5   1  -3 157.580 18.6718   6
  -1  -5  -3 166.084 17.7400   4
  -5   1  -3 264.443 20.5126   1
   1   5  -3 134.848 15.2468   6
   1   5  -3 122.074 15.3582   6
   1   5  -3 206.963 19.6608   1
  -5   1  -2 109459. 10002.8   2
  -1  -5  -2 106641. 10003.3   8
   5  -1  -2 107219. 10003.1   5
  -1  -5  -2 110075. 10002.7   4
   1   5  -2 106016. 10002.9   3
   5  -1  -2 107735. 10001.9   3
   5  -1  -2 106850. 10002.7   7
  -5   1  -2 110279. 10003.1   1
  -5   1  -2 105393. 10002.5   5
   1   5  -2 108163. 10002.8   1
  -1  -5  -2 108957. 10001.6   7
  -5   1  -2 111375. 10002.7   3
   1   5  -2 107744. 10001.6   8
   5  -1  -2 111823. 10001.9   3
   1   5  -2 107713. 10002.7   4
  -5   1  -2 103708. 10003.2   6
   1   5  -2 104733. 10002.9   2
  -5   1  -2 107695. 10002.7   8
  -1  -5  -2 108218. 10003.2   6
   5  -1  -2 109595. 10002.1   1
   1   5  -1 373.908 41.3453   4
  -5   1  -1 403.946 41.2237   5
   5  -1  -1 355.384 41.1253   6
   1   5  -1 372.117 41.0910   3
  -1  -5  -1 373.089 41.0942   6
   5  -1  -1 370.736 39.6112   3
   1   5  -1 375.370 41.1605   7
   5  -1  -1 593.639 40.3669   1
  -5   1  -1 490.629 40.5885   3
  -1  -5  -1 352.966 41.3082   8
  -1  -5  -1 334.150 40.0900   5
  -5   1  -1 396.647 41.4736   8
  -5   1  -1 613.016 41.7603   1
  -1  -5  -1 577.146 41.4112   1
  -1  -5  -1 390.215 42.2073   3
  -5   1  -1 412.303 40.8177   4
   5  -1  -1 406.775 41.8180   4
   1   5  -1 583.560 41.3308   1
   1   5  -1 543.183 41.5103   2
   5  -1  -1 361.620 41.1203   7
   1   5  -1 391.993 41.4864   5
  -5   1  -1 627.651 41.2543   2
   1   5  -1 378.735 40.2068   8
  -1  -5  -1 394.814 41.4147   4
  -5   1  -1 353.475 41.0009   7
  -1  -5  -1 359.876 41.1569   6
  -5   1   0 33730.5 3015.66   4
   5  -1   0 33442.4 3015.29   7
  -1  -5   0 33206.3 3015.06   3
   1   5   0 33937.1 3015.11   1
   5  -1   0 34834.1 3015.50   4
   5  -1   0 33151.5 3014.40   3
  -1  -5   0 32587.9 3015.04   8
   1   5   0 32537.4 3015.11   8
  -1  -5   0 29990.0 3014.74   7
  -1  -5   0 32652.6 3014.75   6
  -5   1   0 33545.9 3015.25   7
  -5   1   0 32756.9 3014.49   2
  -1  -5   0 32641.1 3015.00   2
  -5   1   0 32659.3 3014.61   2
   5  -1   0 31701.2 3014.82   1
  -5   1   0 31794.2 3014.61   3
  -5   1   0 31345.2 3015.56   8
   1   5   0 33360.0 3015.52   3
  -5   1   0 31940.4 3014.66   1
  -1  -5   0 32214.8 3015.16   5
  -5   1   0 30591.2 3015.43   6
  -1  -5   0 32275.4 3014.89   1
   1   5   0 30871.0 3015.27   4
   1   5   0 33665.9 3015.05   5
   1   5   0 34333.6 3014.96   7
   5  -1   0 33776.1 3015.54   8
  -1  -5   1 395.001 42.2239   7
   1   5   1 357.383 40.6046   7
   5  -1   1 421.305 41.3747   4
  -5   1   1 357.406 42.0907   5
   5  -1   1 323.618 41.6020   6
  -1  -5   1 644.924 42.4184   1
  -1  -5   1 438.171 42.3924   4
  -5   1   1 399.334 40.3218   3
  -5   1   1 364.671 41.8477   7
   5  -1   1 644.644 42.0847   2
   5  -1   1 512.957 41.5931   3
   1   5   1 430.080 43.9056   3
   5  -1   1 417.521 41.9452   5
   1   5   1 384.061 40.6822   7
   5  -1   1 621.327 42.0866   1
  -5   1   1 614.253 41.2426   1
   1   5   1 587.894 42.7741   1
  -5   1   1 418.267 42.0347   6
  -1  -5   1 375.523 40.7427   8
   1   5   1 356.503 41.9878   8
   1   5   1 432.224 41.9065   4
   5  -1   1 396.476 41.8117   8
  -1  -5   1 528.843 42.2720   2
  -1  -5   1 395.788 42.7220   5
   1   5   1 372.967 40.6606   5
   5  -1   2 106367. 648.223   2
  -1  -5   2 106631. 655.149   7
  -1  -5   2 106706. 648.739   4
   1   5   2 108786. 642.286   4
  -5   1   2 106934. 657.137   8
   1   5   2 105306. 655.198   1
  -1  -5   2 106216. 646.624   1
   5  -1   2 107118. 643.551   5
   5  -1   2 110485. 648.078   3
  -5   1   2 106403. 640.336   1
  -5   1   2 108252. 646.715   6
   5  -1   2 107803. 632.721   4
   1   5   2 107062. 648.827   3
  -1  -5   2 102568. 655.482   5
   5  -1   2 106918. 646.551   1
   1   5   2 108339. 655.012   2
   5  -1   2 109358. 633.473   4
   5  -1   2 108459. 641.500   8
   5  -1   3 146.026 17.3491   4
   1   5   3 189.448 21.2742   3
   5  -1   3 215.458 21.7006   3
   5  -1   3 154.387 19.7996   5
  -5   1   3 174.081 20.7304   6
  -5   1   3 200.608 22.1231   4
   5  -1   3 138.395 19.2402   8
   1   5   3 155.413 19.2185   4
  -5   1   3 153.470 21.3083   8
   5  -1   3 151.815 20.7770   7
  -5   1   3 273.646 20.9411   1
   1   5   3 296.922 23.1777   2
  -1  -5   3 141.335 22.1125   7
  -1  -5   3 173.785 20.7234   4
   1   5   3 164.473 18.0194   7
  -5   1   3 283.418 18.5839   2
   5  -1   3 248.600 21.7241   2
   1   5   3 303.529 23.3827   1
   5  -1   4 12567.5 1157.98   3
  -5   1   4 12178.6 1157.09   1
  -5   1   4 12667.3 1158.02   4
   5  -1   4 12666.5 1157.57   7
   1   5   4 12708.2 1155.97   7
  -5   1   4 13441.3 1157.65   6
   1   5   4 12245.1 1157.86   2
  -5   1   4 12177.0 1156.61   3
   5  -1   4 13008.0 1157.04   5
   5  -1   4 11671.3 1157.67   2
  -5   1   4 12635.5 1157.89   8
  -5   1   4 11974.8 1156.06   2
   1   5   4 12047.5 1157.49   3
  -1  -5   4 12541.8 1156.99   4
  -1  -5   4 13530.5 1158.60   5
  -5   1   5 1762.08 115.910   1
  -1  -5   5 1127.48 113.569   4
   1   5   5 1666.08 116.832   2
  -5   1   5 1066.39 114.760   6
  -1  -5   5 947.574 115.683   5
   1   5   5 1210.34 115.280   3
  -5   1   5 1088.23 114.968   4
   5  -1   5 1040.07 113.791   5
   5  -1   5 1037.09 114.600   7
  -5   1   5 1554.90 113.669   2
  -5   1   5 975.903 114.592   8
   5  -1   5 1444.02 116.633   3
  -5   1   5 1367.72 114.258   3
  -1  -5   5 976.670 115.118   7
   1   5   5 1031.33 112.426   7
   5  -1   6 929.736 100.600   3
  -5   1   6 1057.55 100.295   4
  -5   1   6 1076.73 99.3338   3
  -5   1   6 963.661 99.8702   8
  -1  -5   6 1128.50 102.204   5
  -5   1   6 1138.39 99.5850   7
  -5   1   6 1003.36 99.7007   1
  -1  -5   6 948.036 100.832   7
   1   5   6 1021.42 100.546   2
  -5   1   6 1059.56 99.5927   5
  -5   1   6 1103.65 100.432   6
   1   5   6 1045.29 100.760   3
  -1  -5   6 981.920 98.5704   4
  -5   1   6 1045.26 98.2992   2
   5  -1   6 992.305 100.165   7
   1   5   6 998.532 98.0865   7
   5  -1   6 1022.65 99.4667   5
   1   5   7 97.2861 10.8055   5
  -1  -5   7 38.7535 23.3330   5
   5  -1   7 24.4056 17.4544   5
  -1  -5   7 23.7739 22.7013   7
  -1  -5   7 26.2363 14.7714   4
  -5   1   7 82.1397 16.1198   2
   5  -1   7 47.5968 19.9851   7
  -5   1   7 42.1689 18.7870   7
   5  -1   7 70.3104 22.7893   3
  -5   1   7 55.6700 19.2266   4
  -5   1   7 61.1000 19.3885   5
  -5   1   7 48.6420 18.9542   8
  -5   1   7 29.0781 17.0418   3
   1   5   7 55.2897 15.3328   7
   1   5   7 96.2992 22.8505   3
  -5   1   7 49.9621 20.1550   6
  -5   1   7 66.0887 19.6111   1
   1   5   7 81.0203 21.9299   2
  -5   1   8 83.3723 23.6168   7
   1   5   8 115.976 25.7955   3
   5  -1   8 107.401 26.6062   2
   5  -1   8 138.271 23.4296   5
   1   5   8 89.3629 15.5048   5
   1   5   8 74.3173 24.4599   2
   1   5   8 78.4600 19.5557   7
  -5   1   8 41.4615 23.8350   6
   5  -1   8 68.8335 25.3895   7
  -1  -5   8 92.3654 18.6024   4
  -5   1   8 91.6941 21.1357   2
  -1  -5   8 107.248 28.6734   5
  -5   1   8 115.942 23.0743   5
   5  -1   8 43.5879 27.5611   3
  -1  -5   8 107.635 28.2633   7
  -5   1   8 103.095 22.8879   3
   1   5   8 98.1246 28.0210   1
  -5   1   8 94.0211 23.4360   1
  -1  -5   9 81.1169 31.7372   5
  -1  -5   9 78.1474 32.6619   7
  -5   1   9 93.2014 23.8837   2
   5  -1   9 85.2220 26.5925   5
  -1  -5   9 44.8647 18.5986   4
  -5   1   9 89.0165 27.4693   7
  -5   1   9 89.1100 26.5696   3
  -5   1   9 81.3738 25.1793   5
   1   5   9 140.322 31.3063   2
   1   5   9 70.7237 29.4600   1
   5  -1   9 41.4462 28.1073   7
   5  -1   9 127.738 32.0942   2
   1   5   9 92.1626 24.4261   7
  -5   1   9 79.1077 28.9862   1
   1   5   9 84.7587 28.7591   3
   1   5  10-2.77679 28.1479   3
   1   5  10 46.7342 29.1885   1
   1   5  10-5.23751 25.1509   2
  -5   1  10 27.9687 22.6751   5
  -1  -5  10-2.78617 28.8939   5
   1   5  10 12.6766 21.8583   7
   5  -1  10 18.0287 25.8674   7
   5  -1  10 16.2047 25.9368   2
  -1  -5  10-2.81492 28.9301   7
  -5   1  10 10.4319 23.4566   7
   5  -1  10 27.6068 23.6464   5
  -5   1  10 15.8772 24.6089   3
   1   5  11 22.6573 28.0747   1
   1   5  11 14.4649 26.5678   2
  -5   1  11-16.0201 25.2983   7
   5  -1  11 20.0157 28.3402   7
   1   5  11-64.0910 31.1932   3
  -1  -5  11-46.4340 30.3807   7
   5  -1  11 14.0286 25.0739   5
  -5   1  11 13.1263 22.3602   5
  -5   1  11 30.6245 27.0817   3
  -1  -5  11 15.0138 29.4695   5
   1   5  12-19.9653 31.5119   3
  -1  -5  12-16.0091 31.2006   5
   1   5  12-28.1886 29.0215   2
  -5   1  12-8.52137 28.0982   3
  -1  -5  12 20.2820 32.8556   7
   5  -1  12 3.12506 29.9105   7
  -5   1  12-10.1111 28.2833   7
  -1  -5  13-51.3086 38.6420   7
   5  -1  13 6.85429 33.2981   7
   5  -1  13 64.0533 35.9520   3
  -5   1  13-9.36094 30.5469   3
   1   5  13 16.8753 32.2889   2
   1   5  13 3.60781 34.6957   3
  -1  -5  13-20.1679 32.9884   5
   1   5  14-7.19764 34.6123   2
   1   5  14-15.4170 36.6702   3
   5  -1  14-14.8343 36.0300   7
  -1  -5  14-75.0204 41.6190   7
   5  -1  14-28.4321 36.8546   3
   1   5  15 8.24088 35.6418   3
   1   5  15 19.1003 35.4945   2
   5  -1  15 47.7942 39.8732   7
  -1  -5  15-29.6058 43.5374   7
   0  -5 -15 31.4444 38.8558   1
   0   5 -15 9.48213 37.7245   1
   0   5 -15 21.3907 37.2434   2
   5   0 -15-42.3998 37.3735   1
  -5   0 -15 9.20844 37.9977   2
   5   0 -15 65.8866 36.6346   3
   0  -5 -15 14.9437 34.0353   6
   0  -5 -14 16.8394 37.1086   1
  -5   0 -14-12.7873 31.7045   6
   0   5 -14 63.7678 37.8177   3
  -5   0 -14 18.0495 38.0170   1
   5   0 -14 23.2724 37.7023   3
  -5   0 -14-4.31758 37.9399   2
   0   5 -14-8.70436 37.7660   1
   0  -5 -14 14.2191 32.8493   6
   0   5 -14 12.3235 35.9863   2
   5   0 -14 14.3071 34.6816   1
   0  -5 -13-13.4740 30.3280   6
   0   5 -13 27.1513 35.2263   2
   0  -5 -13-8.40781 27.9959   8
   5   0 -13-23.1278 29.3939   1
   0  -5 -13-3.92057 34.8742   1
  -5   0 -13-4.00219 35.2748   2
  -5   0 -13-23.5653 30.8041   6
   0   5 -13-4.02434 35.4699   3
   0   5 -13-19.8915 37.3679   1
   5   0 -12-8.06169 25.2529   2
  -5   0 -12 8.09493 26.1694   6
   0  -5 -12 67.2383 26.4801   8
   5   0 -12 12.0347 28.2691   1
   0  -5 -12-12.6242 29.0012   6
   0   5 -12 42.9394 30.3538   1
   5   0 -12 2.69211 27.1526   6
   0   5 -12-21.6922 35.9343   2
   0  -5 -11 52.9338 30.3444   6
   5   0 -11 2.17254 21.7080   8
  -5   0 -11 4.95022 18.3687   8
   0  -5 -11 33.1719 27.2648   8
   0   5 -11 12.8245 28.4362   1
   5   0 -11-17.3599 26.8311   6
   5   0 -11 32.7595 25.9266   1
   5   0 -11 29.4727 25.6311   2
   0   5 -11-10.0016 32.1566   2
  -5   0 -11 7.32495 24.3927   6
   5   0 -11-10.6390 21.3636   4
   0   5 -10 15.4958 17.7553   6
   5   0 -10 24.5421 21.4841   8
   0   5 -10 42.2693 28.5843   2
  -5   0 -10 15.5280 22.6173   6
   0  -5 -10 38.0710 28.3174   6
   0  -5 -10 45.5678 26.0211   8
  -5   0 -10-15.1540 18.3850   8
   0   5 -10 47.9444 27.6233   1
   5   0 -10 68.5803 25.2959   1
   5   0 -10 22.0787 21.7644   4
   5   0 -10 17.5918 21.8995   2
   5   0 -10 15.7271 23.0627   6
   0   5  -9 265.594 39.7487   1
   0   5  -9 220.239 31.2027   6
  -5   0  -9 201.055 39.2771   1
  -5   0  -9 282.779 37.1722   6
   0   5  -9 246.139 42.2393   2
   0  -5  -9 196.908 29.1546   4
   5   0  -9 230.776 34.1113   8
   0  -5  -9 218.922 40.0701   6
  -5   0  -9 218.000 31.5146   8
   0  -5  -9 269.099 38.4865   8
   5   0  -9 306.434 37.2093   1
   5   0  -9 265.580 37.2112   6
   5   0  -9 284.228 35.0515   2
  -5   0  -8 84.7676 21.0489   8
   0   5  -8 155.073 30.5920   2
   0   5  -8 107.726 19.3822   6
  -5   0  -8 188.510 29.3880   1
   0   5  -8 140.744 26.9684   1
  -5   0  -8 92.5430 24.4262   6
   0  -5  -8 150.138 29.8979   6
   0  -5  -8 114.216 18.8715   4
   0   5  -8 112.149 16.2719   8
   0  -5  -8 60.9895 26.1496   8
   0   5  -7 423.310 44.4158   1
   0   5  -7 347.416 38.9575   6
  -5   0  -7 346.501 42.3037   6
   0   5  -7 388.946 37.2857   8
  -5   0  -7 295.108 42.8354   1
   0  -5  -7 447.805 46.0109   6
   0  -5  -7 360.413 39.1138   4
  -5   0  -7 365.657 40.1380   8
   0  -5  -7 391.291 44.4792   8
   0   5  -7 480.222 45.8976   2
   0  -5  -6 26.0348 15.9582   8
   0  -5  -6 22.7892 17.3161   6
   0  -5  -6 16.4476 10.3540   4
   0   5  -6 38.8475 15.3113   1
   0  -5  -6 15.1427 7.16504   5
  -5   0  -6 12.5794 14.2521   6
   0   5  -6 10.4625 6.13315   8
   0   5  -6 7.76276 9.07450   6
   0   5  -6-1.93944 6.06127   8
  -5   0  -6 4.96984 11.4915   8
  -5   0  -6 12.9511 15.0655   1
   0   5  -6 19.5173 16.8231   2
  -5   0  -5 8278.27 767.029   6
   0   5  -5 8042.81 767.463   1
  -5   0  -5 8051.61 767.230   1
   0  -5  -5 8565.55 765.715   4
   0   5  -5 8635.84 765.147   6
   0   5  -5 8041.30 764.248   8
   0  -5  -5 8211.11 764.408   5
   0  -5  -5 8583.18 767.647   8
   0  -5  -5 8422.92 764.572   5
  -5   0  -5 8769.81 766.072   8
   0   5  -5 8375.75 767.805   2
   0  -5  -5 8406.00 764.900   7
   0   5  -5 7900.63 764.180   8
   5   0  -4 3445.54 207.676   2
   0  -5  -4 2334.18 207.389   4
   0   5  -4 2454.05 209.558   3
   0  -5  -4 2146.62 206.073   7
   0  -5  -4 1930.97 205.551   5
  -5   0  -4 2266.19 208.613   6
   0  -5  -4 1940.78 205.621   5
  -5   0  -4 3643.09 210.663   1
   0   5  -4 3303.75 210.525   1
   0   5  -4 3074.00 210.235   2
   0   5  -4 2114.50 206.297   6
   0  -5  -4 2144.38 209.060   8
  -5   0  -4 2112.47 207.519   8
   0   5  -3 7284.76 669.483   6
   0   5  -3 7017.49 671.277   1
   5   0  -3 7625.20 669.763   2
   5   0  -3 7258.54 670.429   3
  -5   0  -3 7099.08 671.083   1
  -5   0  -3 7303.20 671.155   6
   0  -5  -3 7258.47 670.547   4
   0   5  -3 7174.83 671.428   3
   5   0  -3 7171.39 670.247   1
   5   0  -3 7198.69 671.622   5
  -5   0  -3 7024.97 670.578   8
   0  -5  -3 7183.53 669.191   7
   5   0  -3 7421.94 670.365   3
   0   5  -3 7263.27 671.413   2
   5   0  -3 7076.82 669.625   2
   5   0  -2 1767.10 107.653   1
   0  -5  -2 1116.70 108.922   8
   0   5  -2 1213.90 108.774   3
  -5   0  -2 1795.86 109.241   1
   0   5  -2 1895.54 109.839   1
   0  -5  -2 1082.52 108.176   4
   5   0  -2 1511.97 107.756   3
  -5   0  -2 957.311 107.971   8
  -5   0  -2 1407.00 108.490   3
  -5   0  -2 1073.10 107.733   5
   5   0  -2 1060.43 108.896   5
   5   0  -2 1013.40 107.806   6
   0   5  -2 1152.50 108.105   4
  -5   0  -2 1852.79 109.415   2
   0   5  -2 939.724 106.614   6
   0  -5  -2 1177.10 109.034   3
   0  -5  -2 895.267 106.592   5
   5   0  -2 1139.63 107.375   3
  -5   0  -2 1157.45 107.212   4
   0   5  -2 1089.10 108.456   7
   5   0  -1 72977.3 6591.20   6
   0  -5  -1 68914.9 6591.27   3
  -5   0  -1 70894.7 6591.36   8
   0  -5  -1 72008.3 6591.06   6
   0   5  -1 73276.0 6591.24   5
  -5   0  -1 73527.9 6590.69   3
   0  -5  -1 77038.6 6591.08   1
   5   0  -1 73948.4 6591.54   4
   5   0  -1 69908.0 6590.08   1
   5   0  -1 71666.7 6590.31   3
   0  -5  -1 71130.1 6591.37   8
   5   0  -1 72081.8 6591.27   7
  -5   0  -1 70197.6 6590.98   5
   0  -5  -1 68500.5 6591.18   4
   0   5  -1 69318.0 6591.00   1
  -5   0  -1 72483.4 6590.88   2
  -5   0  -1 72450.2 6590.91   4
   0   5  -1 72217.3 6591.13   4
  -5   0  -1 71151.7 6590.89   1
   0   5  -1 69924.5 6590.41   8
   0  -5  -1 70068.9 6590.44   5
   0   5  -1 72031.9 6591.07   7
   0   5  -1 70390.8 6591.04   3
   0   5  -1 70479.6 6590.19   6
   5   0   0 7806.76 673.990   3
   0   5   0 5901.45 674.005   6
   0   5   0 7147.44 674.502   3
   0   5   0 5859.14 674.218   8
   0  -5   0 6142.99 674.236   5
   5   0   0 6641.79 674.614   5
   5   0   0 5823.28 674.528   8
   0  -5   0 6009.14 673.993   7
   0  -5   0 6044.38 673.878   6
   5   0   0 9994.66 674.222   1
   5   0   0 6660.54 674.593   4
  -5   0   0 6282.74 674.588   6
  -5   0   0 10639.6 674.111   1
  -5   0   0 6182.13 674.433   7
   0   5   0 10388.3 674.998   1
   0   5   0 5944.80 673.923   7
  -5   0   0 10157.6 674.102   2
  -5   0   0 6706.47 674.396   3
   0  -5   0 10720.7 674.970   1
   5   0   0 6340.31 674.615   6
   5   0   0 10350.9 674.130   2
   0  -5   0 5931.29 674.183   8
   0  -5   0 6974.24 674.257   3
  -5   0   0 6534.88 674.735   4
   0   5   0 6491.51 674.166   5
  -5   0   1 71820.9 6194.10   6
   0  -5   1 72658.8 6193.05   6
   0   5   1 71407.2 6194.20   1
   0   5   1 73981.7 6193.03   7
   5   0   1 73696.3 6193.77   4
   5   0   1 73479.8 6193.91   2
   5   0   1 70193.8 6193.71   1
   0  -5   1 71442.0 6194.17   4
   0  -5   1 72886.0 6194.24   7
   0  -5   1 70250.8 6194.10   1
   5   0   1 71337.1 6193.80   3
  -5   0   1 73377.6 6194.61   8
   0   5   1 72344.2 6194.36   8
   5   0   1 71661.7 6194.14   8
  -5   0   1 70770.7 6194.21   7
  -5   0   1 35807.2 6192.78   1
   0   5   1 69637.9 6195.19   3
   0   5   1 73879.6 6194.10   4
   0  -5   1 70174.3 6194.08   3
   0   5   1 69907.3 6194.20   6
   0  -5   1 70203.2 6194.38   5
   0  -5   1 67903.7 6194.12   2
   0  -5   1 71093.9 6193.25   8
  -5   0   1 71514.4 6193.20   3
   0   5   1 72991.1 6193.20   5
   5   0   1 71198.7 6193.98   5
   0   5   1 72832.2 6194.35   2
   0  -5   2 1673.74 108.751   1
   5   0   2 1146.05 106.502   4
   0  -5   2 1175.68 107.688   4
   0  -5   2 958.487 106.021   6
   0   5   2 1608.09 109.194   2
  -5   0   2 1068.72 107.363   6
   5   0   2 1056.81 107.285   8
   0  -5   2 988.199 107.932   7
   5   0   2 1846.78 108.987   2
   0   5   2 970.479 105.963   5
   5   0   2 1349.03 108.134   3
   0   5   2 1056.03 108.097   6
   0   5   2 1275.27 108.005   3
   5   0   2 1846.50 108.526   1
   5   0   2 1120.29 107.214   5
  -5   0   2 951.766 107.911   8
  -5   0   2 1851.97 107.529   1
   0   5   2 1108.97 107.390   4
   5   0   2 979.027 107.507   7
   0  -5   3 7354.71 683.868   6
   0   5   3 7381.96 685.738   2
   0   5   3 7231.64 685.255   3
  -5   0   3 7845.44 685.236   6
   0  -5   3 7335.25 685.922   7
   5   0   3 7621.34 685.388   7
   5   0   3 7394.30 685.740   3
   5   0   3 7233.71 685.644   2
  -5   0   3 7552.40 685.881   8
  -5   0   3 7389.55 684.792   1
   0   5   3 6664.04 685.689   6
   0  -5   3 7473.43 685.079   4
   5   0   3 7541.18 684.794   5
  -5   0   3 7352.16 685.923   4
  -5   0   4 3325.73 224.776   2
   0  -5   4 2318.34 225.127   4
   5   0   4 3422.43 227.904   2
   0  -5   4 2016.58 223.910   6
  -5   0   4 2106.73 225.365   6
   0   5   4 2067.94 223.821   7
  -5   0   4 2499.78 226.162   5
   0   5   4 3410.56 227.608   2
   5   0   4 1950.61 225.535   7
  -5   0   4 2057.57 225.847   8
   5   0   4 2706.52 226.993   3
  -5   0   4 3604.13 226.445   1
   0   5   4 2458.21 226.056   3
   5   0   4 2089.56 224.848   5
   0  -5   4 2344.96 226.927   5
  -5   0   4 2140.86 226.104   4
  -5   0   5 9242.40 805.433   6
   0  -5   5 8636.78 804.474   4
  -5   0   5 8805.72 805.466   5
  -5   0   5 8751.46 805.805   4
  -5   0   5 9990.65 805.714   7
   0   5   5 8718.94 803.828   7
   0   5   5 8427.47 805.631   3
  -5   0   5 7960.39 803.976   2
  -5   0   5 8833.28 805.701   8
  -5   0   5 8753.47 804.944   3
   5   0   5 8248.71 806.068   3
   5   0   5 8751.52 804.818   5
   0  -5   5 9354.88 806.793   5
  -5   0   5 8496.24 805.048   1
   0   5   5 8276.21 805.673   2
   5   0   5 8330.78 805.352   7
   0   5   6 20.7395 10.2299   7
   0  -5   6 29.1812 17.2656   7
  -5   0   6 17.7654 13.9586   4
  -5   0   6 24.0094 13.4399   1
  -5   0   6 1.23300 12.2560   3
  -5   0   6 19.2780 14.5736   5
   0   5   6 4.67908 14.9747   3
   5   0   6 24.7316 17.2100   3
  -5   0   6 8.10694 13.0885   8
  -5   0   6 1.30463 13.8136   7
   5   0   6 17.2727 14.2873   7
  -5   0   6 8.03175 13.2304   6
   0  -5   6 8.82774 17.7559   5
   0   5   6 15.6864 15.7489   2
  -5   0   6 6.74157 10.4476   2
   0   5   6 14.4052 16.5844   1
   0  -5   6 32.0060 11.4635   4
   5   0   6 2.28387 12.5871   5
   0  -5   7 471.106 47.4287   5
   0  -5   7 432.667 46.7713   7
   0  -5   7 397.427 45.3346   3
   5   0   7 365.427 44.1224   7
  -5   0   7 364.576 43.0717   1
   0   5   7 355.990 44.8147   1
   0   5   7 342.525 40.3924   7
   0  -5   7 353.475 40.2796   4
  -5   0   7 429.829 43.3104   3
  -5   0   7 413.603 43.2495   4
  -5   0   7 496.034 44.6294   7
   0   5   7 387.722 44.6068   2
  -5   0   7 384.495 43.1252   8
   0   5   7 359.950 38.5110   5
  -5   0   7 402.440 42.9493   6
   5   0   7 327.580 41.8927   5
   5   0   7 371.849 46.5346   3
   0   5   7 409.403 45.0517   3
  -5   0   7 429.347 43.6081   5
   0  -5   8 109.488 29.9667   7
   5   0   8 107.158 24.3328   5
   0  -5   8 153.456 30.4666   5
   5   0   8 120.137 25.8341   7
   0   5   8 192.845 27.6371   2
  -5   0   8 131.631 26.8572   7
   0   5   8 153.765 28.0151   3
  -5   0   8 145.890 25.8229   5
  -5   0   8 138.299 25.0194   3
   0   5   8 129.585 21.4365   7
  -5   0   8 110.275 25.6802   1
   0   5   8 76.4601 16.6303   5
   5   0   8 163.362 29.5074   2
   0  -5   8 82.9931 19.3687   4
  -5   0   8 100.095 24.8596   4
   0  -5   8 141.523 27.7974   3
   0   5   8 159.940 30.0525   1
   5   0   9 237.075 40.5286   2
   0   5   9 270.436 40.6847   3
  -5   0   9 236.839 36.9450   7
   0   5   9 236.163 39.9408   1
   0   5   9 138.156 36.5817   2
   0  -5   9 223.262 29.9801   4
   5   0   9 233.065 33.6435   5
   0  -5   9 242.205 39.8149   5
  -5   0   9 262.209 36.4935   3
   0   5   9 268.563 33.4657   7
   0  -5   9 266.607 40.4667   7
   0  -5   9 289.962 40.7377   3
   5   0   9 281.845 38.4382   7
  -5   0   9 239.791 36.6623   5
  -5   0   9 229.901 35.0344   4
   5   0  10 43.6170 22.9682   5
   0  -5  10 91.0065 28.7999   5
  -5   0  10 63.6444 25.2624   7
   0   5  10 2.90299 27.8043   1
   0  -5  10-19.7010 30.7136   7
  -5   0  10 25.6350 23.6445   5
   0  -5  10 33.8185 26.5145   3
   5   0  10 16.1867 26.4543   2
   0   5  10 15.9824 20.7104   7
   0   5  10 33.0274 24.5507   2
   0   5  10 8.09262 25.2376   3
   5   0  10 7.48872 26.1459   7
  -5   0  10 22.7704 24.9393   3
   0  -5  11 6.00249 30.1364   5
  -5   0  11 15.4486 25.2415   3
   0   5  11-2.97547 29.1594   3
   5   0  11-5.49201 25.8892   7
  -5   0  11 9.76111 27.1661   7
   0   5  11 5.61934 24.7911   2
   0   5  11 22.4648 30.0823   1
  -5   0  11 27.8164 24.1597   5
   5   0  11 35.9289 28.8989   2
   0  -5  11 37.2988 32.3020   7
  -5   0  12 10.5871 28.6830   7
   0   5  12 12.1809 28.2081   2
   0  -5  12 54.4669 33.7857   5
   0  -5  12-13.6519 33.4160   7
   5   0  12-27.2626 31.1771   7
  -5   0  12 62.9168 29.3682   3
   0   5  12-42.3282 31.7998   3
   5   0  12 6.93959 32.7618   3
   0   5  13-32.8342 30.2655   2
   0   5  13 3.52414 31.2670   3
   5   0  13 41.4450 34.7224   3
   0  -5  13 30.4661 32.3251   5
   5   0  13 6.64303 32.0503   7
   0  -5  13 36.9338 35.6332   7
  -5   0  13 52.0439 32.5449   7
   0   5  14 21.0163 32.8978   2
   5   0  14-82.5836 39.0696   7
   0   5  14 22.6200 37.6447   3
   5   0  14 4.06596 37.2404   3
   0  -5  14 11.9090 39.9225   7
   0   5  15 68.6136 38.2529   3
   0   5  15 14.9200 32.7149   2
   0  -5  15-16.9193 40.4042   7
   5   1 -15-65.8919 38.7798   1
  -5  -1 -15-38.9276 35.6753   6
   1  -5 -15-44.1297 39.6765   1
  -1   5 -15-33.9861 42.1888   1
  -1   5 -15-4.41100 37.2339   2
   1  -5 -15 29.5568 35.0662   6
   5   1 -15-12.4170 37.5532   3
  -5  -1 -15-31.9359 40.0289   2
   1  -5 -14-63.7276 34.8472   6
  -1   5 -14-8.96781 39.2748   1
   5   1 -14 3.91922 35.2838   3
   5   1 -14-3.58076 31.2719   1
  -1   5 -14 46.3804 39.3889   2
  -1   5 -14-42.7906 35.9280   3
  -5  -1 -14 67.3511 40.5384   1
  -5  -1 -14-13.1613 34.3316   6
   1  -5 -14 24.8458 35.5870   1
  -5  -1 -14-46.8053 38.3045   2
   5   1 -13 3.28752 27.9670   1
  -1   5 -13-4.06441 34.4604   1
  -1   5 -13 23.8594 34.2729   2
   1  -5 -13 23.1440 33.4592   1
   1  -5 -13-13.4349 30.8471   6
  -5  -1 -13-6.07638 28.0617   6
   5   1 -13 7.34757 31.2524   3
  -1   5 -12 10.9586 31.1858   1
   5   1 -12-33.0977 27.6142   2
   5   1 -12 12.9118 25.3566   6
  -1   5 -12 63.1705 33.5484   2
  -5  -1 -12-2.78878 27.3134   6
   1  -5 -12 44.3189 28.7732   8
   5   1 -12 3.00201 27.2662   1
   1  -5 -12 6.32977 29.8902   6
   5   1 -11 2.16924 21.2972   4
   5   1 -11 2.04322 21.3648   8
   5   1 -11 26.1628 23.9796   6
   5   1 -11 5.06318 24.1629   2
  -1   5 -11 40.9636 32.3193   2
  -1   5 -11-19.6459 31.2483   1
  -5  -1 -11 10.1105 24.5654   6
   1  -5 -11-21.0797 25.9948   8
  -5  -1 -11 1.77655 19.8765   8
   5   1 -11 29.7224 26.5904   1
   1  -5 -11 2.96171 28.4144   6
  -1   5 -10 69.8376 30.1188   1
  -1   5 -10 15.5242 29.6762   2
  -1   5 -10 100.151 20.3913   6
  -5  -1 -10 69.6696 30.1159   1
  -5  -1 -10 19.6689 20.1329   8
   5   1 -10 74.9366 25.1228   2
   5   1 -10 58.1581 24.3559   6
   1  -5 -10 79.3778 28.2370   8
   5   1 -10 34.4888 21.2406   8
  -5  -1 -10 45.9356 25.3963   6
   1  -5 -10 104.157 31.4379   6
   5   1 -10 74.7162 25.4145   1
   5   1  -9 284.802 37.1548   2
  -5  -1  -9 225.797 33.3776   8
  -1   5  -9 216.226 32.4811   6
   5   1  -9 380.747 40.2992   1
   1  -5  -9 170.987 39.4224   6
  -5  -1  -9 357.719 43.5658   1
   1  -5  -9 253.438 31.3961   4
   5   1  -9 204.730 34.9235   8
  -5  -1  -9 218.776 37.2269   6
   1  -5  -9 188.673 38.1701   8
  -1   5  -9 310.611 41.4516   1
   5   1  -9 247.692 37.0706   6
  -1   5  -9 245.048 42.5604   2
   5   1  -8 522.235 56.1968   1
   1  -5  -8 519.825 58.8178   6
   1  -5  -8 491.008 52.6380   4
  -1   5  -8 593.329 59.2634   1
  -5  -1  -8 541.896 54.1139   8
   5   1  -8 529.197 55.3421   6
  -5  -1  -8 473.812 58.2802   1
  -5  -1  -8 463.141 55.9498   6
  -1   5  -8 465.334 58.8751   2
   5   1  -8 526.789 55.5915   2
  -1   5  -8 496.211 50.3227   8
  -1   5  -8 550.712 52.8860   6
   1  -5  -8 551.690 58.5971   8
   1  -5  -7 268.186 36.6954   8
  -1   5  -7 308.681 39.5785   2
  -1   5  -7 378.862 38.2921   1
   5   1  -7 397.126 35.1038   2
   1  -5  -7 230.080 38.7806   6
  -1   5  -7 204.623 27.9304   8
   1  -5  -7 297.427 30.3467   5
  -5  -1  -7 227.878 34.9505   6
   1  -5  -7 269.781 31.5254   4
   5   1  -7 446.840 36.4506   1
  -1   5  -7 253.514 31.1800   6
  -5  -1  -7 236.426 32.7509   8
  -5  -1  -7 489.048 39.9063   1
  -5  -1  -6 232.869 26.4108   8
  -1   5  -6 240.562 29.1221   1
  -1   5  -6 221.765 22.1625   8
   1  -5  -6 220.477 23.5193   5
[truncated: 3,480,495 more chars]
